# Supplementary material
Source: ML conference proceedings conference paper supplement (https://proceedings.mlr.press/v139/rahman21a.html)
Supplement: Supplementary file 3 [file rahman21a-supp.zip]

Archive with 4,370 entries (3,602 files):
- ICMLSupportingDoc 2/
- ICMLSupportingDoc 2/Visualization/
- ICMLSupportingDoc 2/Visualization/OpenShootingAccuracy/
- ICMLSupportingDoc 2/Visualization/OpenShootingAccuracy/QL-AM/
- ICMLSupportingDoc 2/Visualization/OpenShootingAccuracy/QL-AM/run-grvsjnkfrt-tag-Shooting_train_accuracy2.csv
- __MACOSX/
- __MACOSX/ICMLSupportingDoc 2/
- __MACOSX/ICMLSupportingDoc 2/Visualization/
- __MACOSX/ICMLSupportingDoc 2/Visualization/OpenShootingAccuracy/
- __MACOSX/ICMLSupportingDoc 2/Visualization/OpenShootingAccuracy/QL-AM/
- __MACOSX/ICMLSupportingDoc 2/Visualization/OpenShootingAccuracy/QL-AM/._run-grvsjnkfrt-tag-Shooting_train_accuracy2.csv
- ICMLSupportingDoc 2/Visualization/OpenShootingAccuracy/QL-AM/run-rxgenpnipo-tag-Shooting_train_accuracy2.csv
- __MACOSX/ICMLSupportingDoc 2/Visualization/OpenShootingAccuracy/QL-AM/._run-rxgenpnipo-tag-Shooting_train_accuracy2.csv
- ICMLSupportingDoc 2/Visualization/OpenShootingAccuracy/QL-AM/run-sbbrltrgix-tag-Shooting_train_accuracy2.csv
- __MACOSX/ICMLSupportingDoc 2/Visualization/OpenShootingAccuracy/QL-AM/._run-sbbrltrgix-tag-Shooting_train_accuracy2.csv
- ICMLSupportingDoc 2/Visualization/OpenShootingAccuracy/QL-AM/run-edaknggtca-tag-Shooting_train_accuracy2.csv
- __MACOSX/ICMLSupportingDoc 2/Visualization/OpenShootingAccuracy/QL-AM/._run-edaknggtca-tag-Shooting_train_accuracy2.csv
- ICMLSupportingDoc 2/Visualization/OpenShootingAccuracy/QL-AM/run-dhzkirtcio-tag-Shooting_train_accuracy2.csv
- __MACOSX/ICMLSupportingDoc 2/Visualization/OpenShootingAccuracy/QL-AM/._run-dhzkirtcio-tag-Shooting_train_accuracy2.csv
- ICMLSupportingDoc 2/Visualization/OpenShootingAccuracy/QL-AM/run-iodbrjkxfn-tag-Shooting_train_accuracy2.csv
- __MACOSX/ICMLSupportingDoc 2/Visualization/OpenShootingAccuracy/QL-AM/._run-iodbrjkxfn-tag-Shooting_train_accuracy2.csv
- ICMLSupportingDoc 2/Visualization/OpenShootingAccuracy/QL-AM/run-qtldaqxlkc-tag-Shooting_train_accuracy2.csv
- __MACOSX/ICMLSupportingDoc 2/Visualization/OpenShootingAccuracy/QL-AM/._run-qtldaqxlkc-tag-Shooting_train_accuracy2.csv
- ICMLSupportingDoc 2/Visualization/OpenShootingAccuracy/QL-AM/run-ofhfdedubf-tag-Shooting_train_accuracy2.csv
- __MACOSX/ICMLSupportingDoc 2/Visualization/OpenShootingAccuracy/QL-AM/._run-ofhfdedubf-tag-Shooting_train_accuracy2.csv
- __MACOSX/ICMLSupportingDoc 2/Visualization/OpenShootingAccuracy/._QL-AM
- ICMLSupportingDoc 2/Visualization/OpenShootingAccuracy/.DS_Store
- __MACOSX/ICMLSupportingDoc 2/Visualization/OpenShootingAccuracy/._.DS_Store
- ICMLSupportingDoc 2/Visualization/OpenShootingAccuracy/script_plot.py
- __MACOSX/ICMLSupportingDoc 2/Visualization/OpenShootingAccuracy/._script_plot.py
- ICMLSupportingDoc 2/Visualization/OpenShootingAccuracy/GNN/
- ICMLSupportingDoc 2/Visualization/OpenShootingAccuracy/GNN/run-mlgbmswohu-tag-Shooting_train_accuracy.csv
- __MACOSX/ICMLSupportingDoc 2/Visualization/OpenShootingAccuracy/GNN/
- __MACOSX/ICMLSupportingDoc 2/Visualization/OpenShootingAccuracy/GNN/._run-mlgbmswohu-tag-Shooting_train_accuracy.csv
- ICMLSupportingDoc 2/Visualization/OpenShootingAccuracy/GNN/run-vjjzntwsiz-tag-Shooting_train_accuracy.csv
- __MACOSX/ICMLSupportingDoc 2/Visualization/OpenShootingAccuracy/GNN/._run-vjjzntwsiz-tag-Shooting_train_accuracy.csv
- ICMLSupportingDoc 2/Visualization/OpenShootingAccuracy/GNN/run-ofsjzqgtwm-tag-Shooting_train_accuracy.csv
- __MACOSX/ICMLSupportingDoc 2/Visualization/OpenShootingAccuracy/GNN/._run-ofsjzqgtwm-tag-Shooting_train_accuracy.csv
- ICMLSupportingDoc 2/Visualization/OpenShootingAccuracy/GNN/run-mlxrkfjbxy-tag-Shooting_train_accuracy.csv
- __MACOSX/ICMLSupportingDoc 2/Visualization/OpenShootingAccuracy/GNN/._run-mlxrkfjbxy-tag-Shooting_train_accuracy.csv
- ICMLSupportingDoc 2/Visualization/OpenShootingAccuracy/GNN/run-xidnmtcxpe-tag-Shooting_train_accuracy.csv
- __MACOSX/ICMLSupportingDoc 2/Visualization/OpenShootingAccuracy/GNN/._run-xidnmtcxpe-tag-Shooting_train_accuracy.csv
- ICMLSupportingDoc 2/Visualization/OpenShootingAccuracy/GNN/run-zmsfzjkpje-tag-Shooting_train_accuracy.csv
- __MACOSX/ICMLSupportingDoc 2/Visualization/OpenShootingAccuracy/GNN/._run-zmsfzjkpje-tag-Shooting_train_accuracy.csv
- ICMLSupportingDoc 2/Visualization/OpenShootingAccuracy/GNN/run-naeudyfitb-tag-Shooting_train_accuracy.csv
- __MACOSX/ICMLSupportingDoc 2/Visualization/OpenShootingAccuracy/GNN/._run-naeudyfitb-tag-Shooting_train_accuracy.csv
- ICMLSupportingDoc 2/Visualization/OpenShootingAccuracy/GNN/run-rqjimwpcct-tag-Shooting_train_accuracy.csv
- __MACOSX/ICMLSupportingDoc 2/Visualization/OpenShootingAccuracy/GNN/._run-rqjimwpcct-tag-Shooting_train_accuracy.csv
- __MACOSX/ICMLSupportingDoc 2/Visualization/OpenShootingAccuracy/._GNN
- ICMLSupportingDoc 2/Visualization/OpenShootingAccuracy/GNN-AM/
- ICMLSupportingDoc 2/Visualization/OpenShootingAccuracy/GNN-AM/run-eccbjqemxa-tag-Shooting_train_accuracy.csv
- __MACOSX/ICMLSupportingDoc 2/Visualization/OpenShootingAccuracy/GNN-AM/
- __MACOSX/ICMLSupportingDoc 2/Visualization/OpenShootingAccuracy/GNN-AM/._run-eccbjqemxa-tag-Shooting_train_accuracy.csv
- ICMLSupportingDoc 2/Visualization/OpenShootingAccuracy/GNN-AM/run-tmnwxmdfwv-tag-Shooting_train_accuracy.csv
- __MACOSX/ICMLSupportingDoc 2/Visualization/OpenShootingAccuracy/GNN-AM/._run-tmnwxmdfwv-tag-Shooting_train_accuracy.csv
- ICMLSupportingDoc 2/Visualization/OpenShootingAccuracy/GNN-AM/run-jlgvzcuaci-tag-Shooting_train_accuracy.csv
- __MACOSX/ICMLSupportingDoc 2/Visualization/OpenShootingAccuracy/GNN-AM/._run-jlgvzcuaci-tag-Shooting_train_accuracy.csv
- ICMLSupportingDoc 2/Visualization/OpenShootingAccuracy/GNN-AM/run-rqudscjlys-tag-Shooting_train_accuracy.csv
- __MACOSX/ICMLSupportingDoc 2/Visualization/OpenShootingAccuracy/GNN-AM/._run-rqudscjlys-tag-Shooting_train_accuracy.csv
- ICMLSupportingDoc 2/Visualization/OpenShootingAccuracy/GNN-AM/run-ulcpziomis-tag-Shooting_train_accuracy.csv
- __MACOSX/ICMLSupportingDoc 2/Visualization/OpenShootingAccuracy/GNN-AM/._run-ulcpziomis-tag-Shooting_train_accuracy.csv
- ICMLSupportingDoc 2/Visualization/OpenShootingAccuracy/GNN-AM/run-xhnyxflvwp-tag-Shooting_train_accuracy.csv
- __MACOSX/ICMLSupportingDoc 2/Visualization/OpenShootingAccuracy/GNN-AM/._run-xhnyxflvwp-tag-Shooting_train_accuracy.csv
- ICMLSupportingDoc 2/Visualization/OpenShootingAccuracy/GNN-AM/run-xxaligvdjb-tag-Shooting_train_accuracy.csv
- __MACOSX/ICMLSupportingDoc 2/Visualization/OpenShootingAccuracy/GNN-AM/._run-xxaligvdjb-tag-Shooting_train_accuracy.csv
- ICMLSupportingDoc 2/Visualization/OpenShootingAccuracy/GNN-AM/run-mhlkouvlhp-tag-Shooting_train_accuracy.csv
- __MACOSX/ICMLSupportingDoc 2/Visualization/OpenShootingAccuracy/GNN-AM/._run-mhlkouvlhp-tag-Shooting_train_accuracy.csv
- __MACOSX/ICMLSupportingDoc 2/Visualization/OpenShootingAccuracy/._GNN-AM
- ICMLSupportingDoc 2/Visualization/OpenShootingAccuracy/GPL/
- ICMLSupportingDoc 2/Visualization/OpenShootingAccuracy/GPL/run-ebngkvwdyu-tag-Shooting_train_accuracy.csv
- __MACOSX/ICMLSupportingDoc 2/Visualization/OpenShootingAccuracy/GPL/
- __MACOSX/ICMLSupportingDoc 2/Visualization/OpenShootingAccuracy/GPL/._run-ebngkvwdyu-tag-Shooting_train_accuracy.csv
- ICMLSupportingDoc 2/Visualization/OpenShootingAccuracy/GPL/run-rldkcmzglx-tag-Shooting_train_accuracy.csv
- __MACOSX/ICMLSupportingDoc 2/Visualization/OpenShootingAccuracy/GPL/._run-rldkcmzglx-tag-Shooting_train_accuracy.csv
- ICMLSupportingDoc 2/Visualization/OpenShootingAccuracy/GPL/run-haasdoeuvi-tag-Shooting_train_accuracy.csv
- __MACOSX/ICMLSupportingDoc 2/Visualization/OpenShootingAccuracy/GPL/._run-haasdoeuvi-tag-Shooting_train_accuracy.csv
- ICMLSupportingDoc 2/Visualization/OpenShootingAccuracy/GPL/run-xnawgewlkx-tag-Shooting_train_accuracy.csv
- __MACOSX/ICMLSupportingDoc 2/Visualization/OpenShootingAccuracy/GPL/._run-xnawgewlkx-tag-Shooting_train_accuracy.csv
- ICMLSupportingDoc 2/Visualization/OpenShootingAccuracy/GPL/run-hdtfcdcwuv-tag-Shooting_train_accuracy.csv
- __MACOSX/ICMLSupportingDoc 2/Visualization/OpenShootingAccuracy/GPL/._run-hdtfcdcwuv-tag-Shooting_train_accuracy.csv
- ICMLSupportingDoc 2/Visualization/OpenShootingAccuracy/GPL/run-annltlptcl-tag-Shooting_train_accuracy.csv
- __MACOSX/ICMLSupportingDoc 2/Visualization/OpenShootingAccuracy/GPL/._run-annltlptcl-tag-Shooting_train_accuracy.csv
- ICMLSupportingDoc 2/Visualization/OpenShootingAccuracy/GPL/run-baowkcwvgy-tag-Shooting_train_accuracy.csv
- __MACOSX/ICMLSupportingDoc 2/Visualization/OpenShootingAccuracy/GPL/._run-baowkcwvgy-tag-Shooting_train_accuracy.csv
- ICMLSupportingDoc 2/Visualization/OpenShootingAccuracy/GPL/run-ccngnbeaox-tag-Shooting_train_accuracy.csv
- __MACOSX/ICMLSupportingDoc 2/Visualization/OpenShootingAccuracy/GPL/._run-ccngnbeaox-tag-Shooting_train_accuracy.csv
- __MACOSX/ICMLSupportingDoc 2/Visualization/OpenShootingAccuracy/._GPL
- ICMLSupportingDoc 2/Visualization/OpenShootingAccuracy/QL/
- ICMLSupportingDoc 2/Visualization/OpenShootingAccuracy/QL/run-ewywycsjuj-tag-Shooting_train_accuracy2.csv
- __MACOSX/ICMLSupportingDoc 2/Visualization/OpenShootingAccuracy/QL/
- __MACOSX/ICMLSupportingDoc 2/Visualization/OpenShootingAccuracy/QL/._run-ewywycsjuj-tag-Shooting_train_accuracy2.csv
- ICMLSupportingDoc 2/Visualization/OpenShootingAccuracy/QL/run-jkgwdlszub-tag-Shooting_train_accuracy2.csv
- __MACOSX/ICMLSupportingDoc 2/Visualization/OpenShootingAccuracy/QL/._run-jkgwdlszub-tag-Shooting_train_accuracy2.csv
- ICMLSupportingDoc 2/Visualization/OpenShootingAccuracy/QL/run-aiviwcbbvl-tag-Shooting_train_accuracy2.csv
- __MACOSX/ICMLSupportingDoc 2/Visualization/OpenShootingAccuracy/QL/._run-aiviwcbbvl-tag-Shooting_train_accuracy2.csv
- ICMLSupportingDoc 2/Visualization/OpenShootingAccuracy/QL/run-hbulgxtzpv-tag-Shooting_train_accuracy2.csv
- __MACOSX/ICMLSupportingDoc 2/Visualization/OpenShootingAccuracy/QL/._run-hbulgxtzpv-tag-Shooting_train_accuracy2.csv
- ICMLSupportingDoc 2/Visualization/OpenShootingAccuracy/QL/run-qqqvkconlw-tag-Shooting_train_accuracy2.csv
- __MACOSX/ICMLSupportingDoc 2/Visualization/OpenShootingAccuracy/QL/._run-qqqvkconlw-tag-Shooting_train_accuracy2.csv
- ICMLSupportingDoc 2/Visualization/OpenShootingAccuracy/QL/run-adwclsctqk-tag-Shooting_train_accuracy2.csv
- __MACOSX/ICMLSupportingDoc 2/Visualization/OpenShootingAccuracy/QL/._run-adwclsctqk-tag-Shooting_train_accuracy2.csv
- ICMLSupportingDoc 2/Visualization/OpenShootingAccuracy/QL/run-gqtstkdnvc-tag-Shooting_train_accuracy2.csv
- __MACOSX/ICMLSupportingDoc 2/Visualization/OpenShootingAccuracy/QL/._run-gqtstkdnvc-tag-Shooting_train_accuracy2.csv
- ICMLSupportingDoc 2/Visualization/OpenShootingAccuracy/QL/run-zkxtsvlqgb-tag-Shooting_train_accuracy2.csv
- __MACOSX/ICMLSupportingDoc 2/Visualization/OpenShootingAccuracy/QL/._run-zkxtsvlqgb-tag-Shooting_train_accuracy2.csv
- __MACOSX/ICMLSupportingDoc 2/Visualization/OpenShootingAccuracy/._QL
- __MACOSX/ICMLSupportingDoc 2/Visualization/._OpenShootingAccuracy
- ICMLSupportingDoc 2/Visualization/OpenFortAttackRes/
- ICMLSupportingDoc 2/Visualization/OpenFortAttackRes/.DS_Store
- __MACOSX/ICMLSupportingDoc 2/Visualization/OpenFortAttackRes/
- __MACOSX/ICMLSupportingDoc 2/Visualization/OpenFortAttackRes/._.DS_Store
- ICMLSupportingDoc 2/Visualization/OpenFortAttackRes/TRAIN/
- ICMLSupportingDoc 2/Visualization/OpenFortAttackRes/TRAIN/MADDPG/
- ICMLSupportingDoc 2/Visualization/OpenFortAttackRes/TRAIN/MADDPG/run-.-tag-Rewards_adhoc_train2.csv
- __MACOSX/ICMLSupportingDoc 2/Visualization/OpenFortAttackRes/TRAIN/
- __MACOSX/ICMLSupportingDoc 2/Visualization/OpenFortAttackRes/TRAIN/MADDPG/
- __MACOSX/ICMLSupportingDoc 2/Visualization/OpenFortAttackRes/TRAIN/MADDPG/._run-.-tag-Rewards_adhoc_train2.csv
- ICMLSupportingDoc 2/Visualization/OpenFortAttackRes/TRAIN/MADDPG/run-.-tag-Rewards_adhoc_train3.csv
- __MACOSX/ICMLSupportingDoc 2/Visualization/OpenFortAttackRes/TRAIN/MADDPG/._run-.-tag-Rewards_adhoc_train3.csv
- ICMLSupportingDoc 2/Visualization/OpenFortAttackRes/TRAIN/MADDPG/run-.-tag-Rewards_adhoc_train7.csv
- __MACOSX/ICMLSupportingDoc 2/Visualization/OpenFortAttackRes/TRAIN/MADDPG/._run-.-tag-Rewards_adhoc_train7.csv
- ICMLSupportingDoc 2/Visualization/OpenFortAttackRes/TRAIN/MADDPG/run-.-tag-Rewards_adhoc_train6.csv
- __MACOSX/ICMLSupportingDoc 2/Visualization/OpenFortAttackRes/TRAIN/MADDPG/._run-.-tag-Rewards_adhoc_train6.csv
- ICMLSupportingDoc 2/Visualization/OpenFortAttackRes/TRAIN/MADDPG/run-.-tag-Rewards_adhoc_train4.csv
- __MACOSX/ICMLSupportingDoc 2/Visualization/OpenFortAttackRes/TRAIN/MADDPG/._run-.-tag-Rewards_adhoc_train4.csv
- ICMLSupportingDoc 2/Visualization/OpenFortAttackRes/TRAIN/MADDPG/run-.-tag-Rewards_adhoc_train5.csv
- __MACOSX/ICMLSupportingDoc 2/Visualization/OpenFortAttackRes/TRAIN/MADDPG/._run-.-tag-Rewards_adhoc_train5.csv
- ICMLSupportingDoc 2/Visualization/OpenFortAttackRes/TRAIN/MADDPG/run-.-tag-Rewards_adhoc_train.csv
- __MACOSX/ICMLSupportingDoc 2/Visualization/OpenFortAttackRes/TRAIN/MADDPG/._run-.-tag-Rewards_adhoc_train.csv
- ICMLSupportingDoc 2/Visualization/OpenFortAttackRes/TRAIN/MADDPG/run-.-tag-Rewards_adhoc_train8.csv
- __MACOSX/ICMLSupportingDoc 2/Visualization/OpenFortAttackRes/TRAIN/MADDPG/._run-.-tag-Rewards_adhoc_train8.csv
- __MACOSX/ICMLSupportingDoc 2/Visualization/OpenFortAttackRes/TRAIN/._MADDPG
- ICMLSupportingDoc 2/Visualization/OpenFortAttackRes/TRAIN/DGN-Only/
- ICMLSupportingDoc 2/Visualization/OpenFortAttackRes/TRAIN/DGN-Only/run-mlxrkfjbxy-tag-Rewards_train_set.csv
- __MACOSX/ICMLSupportingDoc 2/Visualization/OpenFortAttackRes/TRAIN/DGN-Only/
- __MACOSX/ICMLSupportingDoc 2/Visualization/OpenFortAttackRes/TRAIN/DGN-Only/._run-mlxrkfjbxy-tag-Rewards_train_set.csv
- ICMLSupportingDoc 2/Visualization/OpenFortAttackRes/TRAIN/DGN-Only/run-vjjzntwsiz-tag-Rewards_train_set.csv
- __MACOSX/ICMLSupportingDoc 2/Visualization/OpenFortAttackRes/TRAIN/DGN-Only/._run-vjjzntwsiz-tag-Rewards_train_set.csv
- ICMLSupportingDoc 2/Visualization/OpenFortAttackRes/TRAIN/DGN-Only/run-naeudyfitb-tag-Rewards_train_set.csv
- __MACOSX/ICMLSupportingDoc 2/Visualization/OpenFortAttackRes/TRAIN/DGN-Only/._run-naeudyfitb-tag-Rewards_train_set.csv
- ICMLSupportingDoc 2/Visualization/OpenFortAttackRes/TRAIN/DGN-Only/.DS_Store
- __MACOSX/ICMLSupportingDoc 2/Visualization/OpenFortAttackRes/TRAIN/DGN-Only/._.DS_Store
- ICMLSupportingDoc 2/Visualization/OpenFortAttackRes/TRAIN/DGN-Only/run-ofsjzqgtwm-tag-Rewards_train_set.csv
- __MACOSX/ICMLSupportingDoc 2/Visualization/OpenFortAttackRes/TRAIN/DGN-Only/._run-ofsjzqgtwm-tag-Rewards_train_set.csv
- ICMLSupportingDoc 2/Visualization/OpenFortAttackRes/TRAIN/DGN-Only/run-zmsfzjkpje-tag-Rewards_train_set.csv
- __MACOSX/ICMLSupportingDoc 2/Visualization/OpenFortAttackRes/TRAIN/DGN-Only/._run-zmsfzjkpje-tag-Rewards_train_set.csv
- ICMLSupportingDoc 2/Visualization/OpenFortAttackRes/TRAIN/DGN-Only/run-xidnmtcxpe-tag-Rewards_train_set.csv
- __MACOSX/ICMLSupportingDoc 2/Visualization/OpenFortAttackRes/TRAIN/DGN-Only/._run-xidnmtcxpe-tag-Rewards_train_set.csv
- ICMLSupportingDoc 2/Visualization/OpenFortAttackRes/TRAIN/DGN-Only/run-rqjimwpcct-tag-Rewards_train_set.csv
- __MACOSX/ICMLSupportingDoc 2/Visualization/OpenFortAttackRes/TRAIN/DGN-Only/._run-rqjimwpcct-tag-Rewards_train_set.csv
- ICMLSupportingDoc 2/Visualization/OpenFortAttackRes/TRAIN/DGN-Only/run-mlgbmswohu-tag-Rewards_train_set.csv
- __MACOSX/ICMLSupportingDoc 2/Visualization/OpenFortAttackRes/TRAIN/DGN-Only/._run-mlgbmswohu-tag-Rewards_train_set.csv
- __MACOSX/ICMLSupportingDoc 2/Visualization/OpenFortAttackRes/TRAIN/._DGN-Only
- ICMLSupportingDoc 2/Visualization/OpenFortAttackRes/TRAIN/.DS_Store
- __MACOSX/ICMLSupportingDoc 2/Visualization/OpenFortAttackRes/TRAIN/._.DS_Store
- ICMLSupportingDoc 2/Visualization/OpenFortAttackRes/TRAIN/DGN-MARL_Test/
- ICMLSupportingDoc 2/Visualization/OpenFortAttackRes/TRAIN/DGN-MARL_Test/run-.-tag-Rewards_adhoc_test8.csv
- __MACOSX/ICMLSupportingDoc 2/Visualization/OpenFortAttackRes/TRAIN/DGN-MARL_Test/
- __MACOSX/ICMLSupportingDoc 2/Visualization/OpenFortAttackRes/TRAIN/DGN-MARL_Test/._run-.-tag-Rewards_adhoc_test8.csv
- ICMLSupportingDoc 2/Visualization/OpenFortAttackRes/TRAIN/DGN-MARL_Test/run-.-tag-Rewards_adhoc_test4.csv
- __MACOSX/ICMLSupportingDoc 2/Visualization/OpenFortAttackRes/TRAIN/DGN-MARL_Test/._run-.-tag-Rewards_adhoc_test4.csv
- ICMLSupportingDoc 2/Visualization/OpenFortAttackRes/TRAIN/DGN-MARL_Test/run-.-tag-Rewards_adhoc_test5.csv
- __MACOSX/ICMLSupportingDoc 2/Visualization/OpenFortAttackRes/TRAIN/DGN-MARL_Test/._run-.-tag-Rewards_adhoc_test5.csv
- ICMLSupportingDoc 2/Visualization/OpenFortAttackRes/TRAIN/DGN-MARL_Test/run-.-tag-Rewards_adhoc_test7.csv
- __MACOSX/ICMLSupportingDoc 2/Visualization/OpenFortAttackRes/TRAIN/DGN-MARL_Test/._run-.-tag-Rewards_adhoc_test7.csv
- ICMLSupportingDoc 2/Visualization/OpenFortAttackRes/TRAIN/DGN-MARL_Test/run-.-tag-Rewards_adhoc_test6.csv
- __MACOSX/ICMLSupportingDoc 2/Visualization/OpenFortAttackRes/TRAIN/DGN-MARL_Test/._run-.-tag-Rewards_adhoc_test6.csv
- ICMLSupportingDoc 2/Visualization/OpenFortAttackRes/TRAIN/DGN-MARL_Test/run-.-tag-Rewards_adhoc_test2.csv
- __MACOSX/ICMLSupportingDoc 2/Visualization/OpenFortAttackRes/TRAIN/DGN-MARL_Test/._run-.-tag-Rewards_adhoc_test2.csv
- ICMLSupportingDoc 2/Visualization/OpenFortAttackRes/TRAIN/DGN-MARL_Test/run-.-tag-Rewards_adhoc_test3.csv
- __MACOSX/ICMLSupportingDoc 2/Visualization/OpenFortAttackRes/TRAIN/DGN-MARL_Test/._run-.-tag-Rewards_adhoc_test3.csv
- ICMLSupportingDoc 2/Visualization/OpenFortAttackRes/TRAIN/DGN-MARL_Test/run-.-tag-Rewards_adhoc_test.csv
- __MACOSX/ICMLSupportingDoc 2/Visualization/OpenFortAttackRes/TRAIN/DGN-MARL_Test/._run-.-tag-Rewards_adhoc_test.csv
- __MACOSX/ICMLSupportingDoc 2/Visualization/OpenFortAttackRes/TRAIN/._DGN-MARL_Test
- ICMLSupportingDoc 2/Visualization/OpenFortAttackRes/TRAIN/LSTM_test/
- ICMLSupportingDoc 2/Visualization/OpenFortAttackRes/TRAIN/LSTM_test/run-zkxtsvlqgb-tag-Rewards_eval.csv
- __MACOSX/ICMLSupportingDoc 2/Visualization/OpenFortAttackRes/TRAIN/LSTM_test/
- __MACOSX/ICMLSupportingDoc 2/Visualization/OpenFortAttackRes/TRAIN/LSTM_test/._run-zkxtsvlqgb-tag-Rewards_eval.csv
- ICMLSupportingDoc 2/Visualization/OpenFortAttackRes/TRAIN/LSTM_test/run-qqqvkconlw-tag-Rewards_eval.csv
- __MACOSX/ICMLSupportingDoc 2/Visualization/OpenFortAttackRes/TRAIN/LSTM_test/._run-qqqvkconlw-tag-Rewards_eval.csv
- ICMLSupportingDoc 2/Visualization/OpenFortAttackRes/TRAIN/LSTM_test/run-gqtstkdnvc-tag-Rewards_eval.csv
- __MACOSX/ICMLSupportingDoc 2/Visualization/OpenFortAttackRes/TRAIN/LSTM_test/._run-gqtstkdnvc-tag-Rewards_eval.csv
- ICMLSupportingDoc 2/Visualization/OpenFortAttackRes/TRAIN/LSTM_test/run-adwclsctqk-tag-Rewards_eval.csv
- __MACOSX/ICMLSupportingDoc 2/Visualization/OpenFortAttackRes/TRAIN/LSTM_test/._run-adwclsctqk-tag-Rewards_eval.csv
- ICMLSupportingDoc 2/Visualization/OpenFortAttackRes/TRAIN/LSTM_test/run-aiviwcbbvl-tag-Rewards_eval.csv
- __MACOSX/ICMLSupportingDoc 2/Visualization/OpenFortAttackRes/TRAIN/LSTM_test/._run-aiviwcbbvl-tag-Rewards_eval.csv
- ICMLSupportingDoc 2/Visualization/OpenFortAttackRes/TRAIN/LSTM_test/run-ewywycsjuj-tag-Rewards_eval.csv
- __MACOSX/ICMLSupportingDoc 2/Visualization/OpenFortAttackRes/TRAIN/LSTM_test/._run-ewywycsjuj-tag-Rewards_eval.csv
- ICMLSupportingDoc 2/Visualization/OpenFortAttackRes/TRAIN/LSTM_test/run-jkgwdlszub-tag-Rewards_eval.csv
- __MACOSX/ICMLSupportingDoc 2/Visualization/OpenFortAttackRes/TRAIN/LSTM_test/._run-jkgwdlszub-tag-Rewards_eval.csv
- ICMLSupportingDoc 2/Visualization/OpenFortAttackRes/TRAIN/LSTM_test/run-hbulgxtzpv-tag-Rewards_eval.csv
- __MACOSX/ICMLSupportingDoc 2/Visualization/OpenFortAttackRes/TRAIN/LSTM_test/._run-hbulgxtzpv-tag-Rewards_eval.csv
- __MACOSX/ICMLSupportingDoc 2/Visualization/OpenFortAttackRes/TRAIN/._LSTM_test
- ICMLSupportingDoc 2/Visualization/OpenFortAttackRes/TRAIN/vis.py
- __MACOSX/ICMLSupportingDoc 2/Visualization/OpenFortAttackRes/TRAIN/._vis.py
- ICMLSupportingDoc 2/Visualization/OpenFortAttackRes/TRAIN/GNN/
- ICMLSupportingDoc 2/Visualization/OpenFortAttackRes/TRAIN/GNN/run-xnawgewlkx-tag-Rewards_train_set.csv
- __MACOSX/ICMLSupportingDoc 2/Visualization/OpenFortAttackRes/TRAIN/GNN/
- __MACOSX/ICMLSupportingDoc 2/Visualization/OpenFortAttackRes/TRAIN/GNN/._run-xnawgewlkx-tag-Rewards_train_set.csv
- ICMLSupportingDoc 2/Visualization/OpenFortAttackRes/TRAIN/GNN/.DS_Store
- __MACOSX/ICMLSupportingDoc 2/Visualization/OpenFortAttackRes/TRAIN/GNN/._.DS_Store
- ICMLSupportingDoc 2/Visualization/OpenFortAttackRes/TRAIN/GNN/run-annltlptcl-tag-Rewards_train_set.csv
- __MACOSX/ICMLSupportingDoc 2/Visualization/OpenFortAttackRes/TRAIN/GNN/._run-annltlptcl-tag-Rewards_train_set.csv
- ICMLSupportingDoc 2/Visualization/OpenFortAttackRes/TRAIN/GNN/run-ebngkvwdyu-tag-Rewards_train_set.csv
- __MACOSX/ICMLSupportingDoc 2/Visualization/OpenFortAttackRes/TRAIN/GNN/._run-ebngkvwdyu-tag-Rewards_train_set.csv
- ICMLSupportingDoc 2/Visualization/OpenFortAttackRes/TRAIN/GNN/run-hdtfcdcwuv-tag-Rewards_train_set.csv
- __MACOSX/ICMLSupportingDoc 2/Visualization/OpenFortAttackRes/TRAIN/GNN/._run-hdtfcdcwuv-tag-Rewards_train_set.csv
- ICMLSupportingDoc 2/Visualization/OpenFortAttackRes/TRAIN/GNN/run-baowkcwvgy-tag-Rewards_train_set.csv
- __MACOSX/ICMLSupportingDoc 2/Visualization/OpenFortAttackRes/TRAIN/GNN/._run-baowkcwvgy-tag-Rewards_train_set.csv
- ICMLSupportingDoc 2/Visualization/OpenFortAttackRes/TRAIN/GNN/run-rldkcmzglx-tag-Rewards_train_set.csv
- __MACOSX/ICMLSupportingDoc 2/Visualization/OpenFortAttackRes/TRAIN/GNN/._run-rldkcmzglx-tag-Rewards_train_set.csv
- ICMLSupportingDoc 2/Visualization/OpenFortAttackRes/TRAIN/GNN/run-ccngnbeaox-tag-Rewards_train_set.csv
- __MACOSX/ICMLSupportingDoc 2/Visualization/OpenFortAttackRes/TRAIN/GNN/._run-ccngnbeaox-tag-Rewards_train_set.csv
- ICMLSupportingDoc 2/Visualization/OpenFortAttackRes/TRAIN/GNN/run-haasdoeuvi-tag-Rewards_train_set.csv
- __MACOSX/ICMLSupportingDoc 2/Visualization/OpenFortAttackRes/TRAIN/GNN/._run-haasdoeuvi-tag-Rewards_train_set.csv
- __MACOSX/ICMLSupportingDoc 2/Visualization/OpenFortAttackRes/TRAIN/._GNN
- ICMLSupportingDoc 2/Visualization/OpenFortAttackRes/TRAIN/DGN_Test/
- ICMLSupportingDoc 2/Visualization/OpenFortAttackRes/TRAIN/DGN_Test/run-xxaligvdjb-tag-Rewards_eval.csv
- __MACOSX/ICMLSupportingDoc 2/Visualization/OpenFortAttackRes/TRAIN/DGN_Test/
- __MACOSX/ICMLSupportingDoc 2/Visualization/OpenFortAttackRes/TRAIN/DGN_Test/._run-xxaligvdjb-tag-Rewards_eval.csv
- ICMLSupportingDoc 2/Visualization/OpenFortAttackRes/TRAIN/DGN_Test/run-rqudscjlys-tag-Rewards_eval.csv
- __MACOSX/ICMLSupportingDoc 2/Visualization/OpenFortAttackRes/TRAIN/DGN_Test/._run-rqudscjlys-tag-Rewards_eval.csv
- ICMLSupportingDoc 2/Visualization/OpenFortAttackRes/TRAIN/DGN_Test/run-xhnyxflvwp-tag-Rewards_eval.csv
- __MACOSX/ICMLSupportingDoc 2/Visualization/OpenFortAttackRes/TRAIN/DGN_Test/._run-xhnyxflvwp-tag-Rewards_eval.csv
- ICMLSupportingDoc 2/Visualization/OpenFortAttackRes/TRAIN/DGN_Test/run-ulcpziomis-tag-Rewards_eval.csv
- __MACOSX/ICMLSupportingDoc 2/Visualization/OpenFortAttackRes/TRAIN/DGN_Test/._run-ulcpziomis-tag-Rewards_eval.csv
- ICMLSupportingDoc 2/Visualization/OpenFortAttackRes/TRAIN/DGN_Test/run-eccbjqemxa-tag-Rewards_eval.csv
- __MACOSX/ICMLSupportingDoc 2/Visualization/OpenFortAttackRes/TRAIN/DGN_Test/._run-eccbjqemxa-tag-Rewards_eval.csv
- ICMLSupportingDoc 2/Visualization/OpenFortAttackRes/TRAIN/DGN_Test/run-jlgvzcuaci-tag-Rewards_eval.csv
- __MACOSX/ICMLSupportingDoc 2/Visualization/OpenFortAttackRes/TRAIN/DGN_Test/._run-jlgvzcuaci-tag-Rewards_eval.csv
- ICMLSupportingDoc 2/Visualization/OpenFortAttackRes/TRAIN/DGN_Test/run-tmnwxmdfwv-tag-Rewards_eval.csv
- __MACOSX/ICMLSupportingDoc 2/Visualization/OpenFortAttackRes/TRAIN/DGN_Test/._run-tmnwxmdfwv-tag-Rewards_eval.csv
- ICMLSupportingDoc 2/Visualization/OpenFortAttackRes/TRAIN/DGN_Test/run-mhlkouvlhp-tag-Rewards_eval.csv
- __MACOSX/ICMLSupportingDoc 2/Visualization/OpenFortAttackRes/TRAIN/DGN_Test/._run-mhlkouvlhp-tag-Rewards_eval.csv
- __MACOSX/ICMLSupportingDoc 2/Visualization/OpenFortAttackRes/TRAIN/._DGN_Test
- ICMLSupportingDoc 2/Visualization/OpenFortAttackRes/TRAIN/LSTM-RFM/
- ICMLSupportingDoc 2/Visualization/OpenFortAttackRes/TRAIN/LSTM-RFM/run-sbbrltrgix-tag-Rewards_train_set.csv
- __MACOSX/ICMLSupportingDoc 2/Visualization/OpenFortAttackRes/TRAIN/LSTM-RFM/
- __MACOSX/ICMLSupportingDoc 2/Visualization/OpenFortAttackRes/TRAIN/LSTM-RFM/._run-sbbrltrgix-tag-Rewards_train_set.csv
- ICMLSupportingDoc 2/Visualization/OpenFortAttackRes/TRAIN/LSTM-RFM/run-dhzkirtcio-tag-Rewards_train_set.csv
- __MACOSX/ICMLSupportingDoc 2/Visualization/OpenFortAttackRes/TRAIN/LSTM-RFM/._run-dhzkirtcio-tag-Rewards_train_set.csv
- ICMLSupportingDoc 2/Visualization/OpenFortAttackRes/TRAIN/LSTM-RFM/run-ofhfdedubf-tag-Rewards_train_set.csv
- __MACOSX/ICMLSupportingDoc 2/Visualization/OpenFortAttackRes/TRAIN/LSTM-RFM/._run-ofhfdedubf-tag-Rewards_train_set.csv
- ICMLSupportingDoc 2/Visualization/OpenFortAttackRes/TRAIN/LSTM-RFM/.DS_Store
- __MACOSX/ICMLSupportingDoc 2/Visualization/OpenFortAttackRes/TRAIN/LSTM-RFM/._.DS_Store
- ICMLSupportingDoc 2/Visualization/OpenFortAttackRes/TRAIN/LSTM-RFM/run-qtldaqxlkc-tag-Rewards_train_set.csv
- __MACOSX/ICMLSupportingDoc 2/Visualization/OpenFortAttackRes/TRAIN/LSTM-RFM/._run-qtldaqxlkc-tag-Rewards_train_set.csv
- ICMLSupportingDoc 2/Visualization/OpenFortAttackRes/TRAIN/LSTM-RFM/run-edaknggtca-tag-Rewards_train_set.csv
- __MACOSX/ICMLSupportingDoc 2/Visualization/OpenFortAttackRes/TRAIN/LSTM-RFM/._run-edaknggtca-tag-Rewards_train_set.csv
- ICMLSupportingDoc 2/Visualization/OpenFortAttackRes/TRAIN/LSTM-RFM/run-grvsjnkfrt-tag-Rewards_train_set.csv
- __MACOSX/ICMLSupportingDoc 2/Visualization/OpenFortAttackRes/TRAIN/LSTM-RFM/._run-grvsjnkfrt-tag-Rewards_train_set.csv
- ICMLSupportingDoc 2/Visualization/OpenFortAttackRes/TRAIN/LSTM-RFM/run-iodbrjkxfn-tag-Rewards_train_set.csv
- __MACOSX/ICMLSupportingDoc 2/Visualization/OpenFortAttackRes/TRAIN/LSTM-RFM/._run-iodbrjkxfn-tag-Rewards_train_set.csv
- ICMLSupportingDoc 2/Visualization/OpenFortAttackRes/TRAIN/LSTM-RFM/run-rxgenpnipo-tag-Rewards_train_set.csv
- __MACOSX/ICMLSupportingDoc 2/Visualization/OpenFortAttackRes/TRAIN/LSTM-RFM/._run-rxgenpnipo-tag-Rewards_train_set.csv
- __MACOSX/ICMLSupportingDoc 2/Visualization/OpenFortAttackRes/TRAIN/._LSTM-RFM
- ICMLSupportingDoc 2/Visualization/OpenFortAttackRes/TRAIN/GNN_test/
- ICMLSupportingDoc 2/Visualization/OpenFortAttackRes/TRAIN/GNN_test/run-hdtfcdcwuv-tag-Rewards_eval.csv
- __MACOSX/ICMLSupportingDoc 2/Visualization/OpenFortAttackRes/TRAIN/GNN_test/
- __MACOSX/ICMLSupportingDoc 2/Visualization/OpenFortAttackRes/TRAIN/GNN_test/._run-hdtfcdcwuv-tag-Rewards_eval.csv
- ICMLSupportingDoc 2/Visualization/OpenFortAttackRes/TRAIN/GNN_test/run-rldkcmzglx-tag-Rewards_eval.csv
- __MACOSX/ICMLSupportingDoc 2/Visualization/OpenFortAttackRes/TRAIN/GNN_test/._run-rldkcmzglx-tag-Rewards_eval.csv
- ICMLSupportingDoc 2/Visualization/OpenFortAttackRes/TRAIN/GNN_test/.DS_Store
- __MACOSX/ICMLSupportingDoc 2/Visualization/OpenFortAttackRes/TRAIN/GNN_test/._.DS_Store
- ICMLSupportingDoc 2/Visualization/OpenFortAttackRes/TRAIN/GNN_test/run-ebngkvwdyu-tag-Rewards_eval.csv
- __MACOSX/ICMLSupportingDoc 2/Visualization/OpenFortAttackRes/TRAIN/GNN_test/._run-ebngkvwdyu-tag-Rewards_eval.csv
- ICMLSupportingDoc 2/Visualization/OpenFortAttackRes/TRAIN/GNN_test/run-baowkcwvgy-tag-Rewards_eval.csv
- __MACOSX/ICMLSupportingDoc 2/Visualization/OpenFortAttackRes/TRAIN/GNN_test/._run-baowkcwvgy-tag-Rewards_eval.csv
- ICMLSupportingDoc 2/Visualization/OpenFortAttackRes/TRAIN/GNN_test/run-xnawgewlkx-tag-Rewards_eval.csv
- __MACOSX/ICMLSupportingDoc 2/Visualization/OpenFortAttackRes/TRAIN/GNN_test/._run-xnawgewlkx-tag-Rewards_eval.csv
- ICMLSupportingDoc 2/Visualization/OpenFortAttackRes/TRAIN/GNN_test/run-haasdoeuvi-tag-Rewards_eval.csv
- __MACOSX/ICMLSupportingDoc 2/Visualization/OpenFortAttackRes/TRAIN/GNN_test/._run-haasdoeuvi-tag-Rewards_eval.csv
- ICMLSupportingDoc 2/Visualization/OpenFortAttackRes/TRAIN/GNN_test/run-annltlptcl-tag-Rewards_eval.csv
- __MACOSX/ICMLSupportingDoc 2/Visualization/OpenFortAttackRes/TRAIN/GNN_test/._run-annltlptcl-tag-Rewards_eval.csv
- ICMLSupportingDoc 2/Visualization/OpenFortAttackRes/TRAIN/GNN_test/run-ccngnbeaox-tag-Rewards_eval.csv
- __MACOSX/ICMLSupportingDoc 2/Visualization/OpenFortAttackRes/TRAIN/GNN_test/._run-ccngnbeaox-tag-Rewards_eval.csv
- __MACOSX/ICMLSupportingDoc 2/Visualization/OpenFortAttackRes/TRAIN/._GNN_test
- ICMLSupportingDoc 2/Visualization/OpenFortAttackRes/TRAIN/DGN-MARL/
- ICMLSupportingDoc 2/Visualization/OpenFortAttackRes/TRAIN/DGN-MARL/run-.-tag-Rewards_adhoc_train2.csv
- __MACOSX/ICMLSupportingDoc 2/Visualization/OpenFortAttackRes/TRAIN/DGN-MARL/
- __MACOSX/ICMLSupportingDoc 2/Visualization/OpenFortAttackRes/TRAIN/DGN-MARL/._run-.-tag-Rewards_adhoc_train2.csv
- ICMLSupportingDoc 2/Visualization/OpenFortAttackRes/TRAIN/DGN-MARL/run-.-tag-Rewards_adhoc_train3.csv
- __MACOSX/ICMLSupportingDoc 2/Visualization/OpenFortAttackRes/TRAIN/DGN-MARL/._run-.-tag-Rewards_adhoc_train3.csv
- ICMLSupportingDoc 2/Visualization/OpenFortAttackRes/TRAIN/DGN-MARL/run-.-tag-Rewards_adhoc_train7.csv
- __MACOSX/ICMLSupportingDoc 2/Visualization/OpenFortAttackRes/TRAIN/DGN-MARL/._run-.-tag-Rewards_adhoc_train7.csv
- ICMLSupportingDoc 2/Visualization/OpenFortAttackRes/TRAIN/DGN-MARL/run-.-tag-Rewards_adhoc_train6.csv
- __MACOSX/ICMLSupportingDoc 2/Visualization/OpenFortAttackRes/TRAIN/DGN-MARL/._run-.-tag-Rewards_adhoc_train6.csv
- ICMLSupportingDoc 2/Visualization/OpenFortAttackRes/TRAIN/DGN-MARL/run-.-tag-Rewards_adhoc_train4.csv
- __MACOSX/ICMLSupportingDoc 2/Visualization/OpenFortAttackRes/TRAIN/DGN-MARL/._run-.-tag-Rewards_adhoc_train4.csv
- ICMLSupportingDoc 2/Visualization/OpenFortAttackRes/TRAIN/DGN-MARL/run-.-tag-Rewards_adhoc_train5.csv
- __MACOSX/ICMLSupportingDoc 2/Visualization/OpenFortAttackRes/TRAIN/DGN-MARL/._run-.-tag-Rewards_adhoc_train5.csv
- ICMLSupportingDoc 2/Visualization/OpenFortAttackRes/TRAIN/DGN-MARL/run-.-tag-Rewards_adhoc_train.csv
- __MACOSX/ICMLSupportingDoc 2/Visualization/OpenFortAttackRes/TRAIN/DGN-MARL/._run-.-tag-Rewards_adhoc_train.csv
- ICMLSupportingDoc 2/Visualization/OpenFortAttackRes/TRAIN/DGN-MARL/run-.-tag-Rewards_adhoc_train8.csv
- __MACOSX/ICMLSupportingDoc 2/Visualization/OpenFortAttackRes/TRAIN/DGN-MARL/._run-.-tag-Rewards_adhoc_train8.csv
- __MACOSX/ICMLSupportingDoc 2/Visualization/OpenFortAttackRes/TRAIN/._DGN-MARL
- ICMLSupportingDoc 2/Visualization/OpenFortAttackRes/TRAIN/GPL/
- ICMLSupportingDoc 2/Visualization/OpenFortAttackRes/TRAIN/GPL/run-hskuwhhuur-tag-Rewards_train_set.csv
- __MACOSX/ICMLSupportingDoc 2/Visualization/OpenFortAttackRes/TRAIN/GPL/
- __MACOSX/ICMLSupportingDoc 2/Visualization/OpenFortAttackRes/TRAIN/GPL/._run-hskuwhhuur-tag-Rewards_train_set.csv
[truncated: 4,070 more entries]
