# Supplementary material
Source: ML conference proceedings conference paper supplement (https://proceedings.mlr.press/v139/rahman21a.html)
Supplement: Supplementary file 3 [file rahman21a-supp.zip › ICMLSupportingDoc 2/Visualization/OpenFortAttackRes/EVAL/GPL/run-bmzkntvgtr-tag-Rewards_eval.csv]

Wall time	Step	Value
1608145978.634824	0	-3.8465116024017334
1608147239.7987118	1	-6.039130210876465
1608148498.0886426	2	-2.5924999713897705
1608149729.609914	3	-5.758620738983154
1608150947.2828066	4	-5.884210586547852
1608152204.3748996	5	-2.4162790775299072
1608153459.8247476	6	-7.78000020980835
1608154712.6700087	7	-1.3529411554336548
1608155997.957953	8	-0.6380952596664429
1608157257.644948	9	-4.4282050132751465
1608158539.7678773	10	-1.962499976158142
1608159817.6312957	11	-3.1365854740142822
1608161097.7536616	12	-3.0299999713897705
1608162339.1608355	13	-6.809999942779541
1608163560.8769503	14	-3.4749999046325684
1608164754.9766965	15	-2.444117546081543
1608165952.6159515	16	-3.0406250953674316
1608167147.7720013	17	-4.3222222328186035
1608168362.3025258	18	-2.0808510780334473
1608169586.0380483	19	-1.3969696760177612
1608170777.8292081	20	2.6500000953674316
1608171958.7848084	21	0.47567567229270935
1608173121.7090998	22	-0.02666666731238365
1608174289.0471008	23	-2.683871030807495
1608175440.910189	24	0.7708333134651184
1608176596.264134	25	0.49714285135269165
1608177763.7409265	26	-0.2947368323802948
1608178922.2205038	27	0.328000009059906
1608180077.2303157	28	2.1481480598449707
1608181218.0630977	29	-0.4950000047683716
1608182355.0294065	30	1.5099999904632568
1608183495.008905	31	2.0357143878936768
1608184619.582423	32	1.2488372325897217
1608185774.9127212	33	3.615217447280884
1608186941.5108612	34	2.476470470428467
1608188092.3932931	35	1.25
1608189240.8933575	36	6.831999778747559
1608190528.180691	37	1.6184210777282715
1608192059.4788346	38	4.07027006149292
1608193583.7809985	39	6.712500095367432
1608195085.5923533	40	4.134615421295166
1608196593.7814817	41	8.130952835083008
1608198078.5219295	42	6.53157901763916
1608199567.825641	43	11.185365676879883
1608201060.889962	44	6.567857265472412
1608202561.5779054	45	5.931250095367432
1608204070.189753	46	7.171794891357422
1608205545.6095464	47	11.841935157775879
1608207031.7966418	48	6.960000038146973
1608208508.9827955	49	10.386666297912598
1608209972.8711805	50	-0.5764706134796143
1608211442.30505	51	9.091489791870117
1608212933.531024	52	7.737209320068359
1608214384.089752	53	8.289473533630371
1608215829.180596	54	10.090322494506836
1608217287.6149206	55	12.241025924682617
1608218730.6411054	56	13.183333396911621
1608220168.4346259	57	12.550000190734863
1608221616.982353	58	11.982353210449219
1608223074.8009644	59	9.084375381469727
1608224529.3194578	60	15.182758331298828
1608226011.7946725	61	15.298112869262695
1608227480.9682066	62	11.793548583984375
1608228953.5003567	63	9.352777481079102
1608230405.3094347	64	15.858181953430176
1608231846.4075623	65	14.011628150939941
1608233302.4545047	66	9.036110877990723
1608234759.8774977	67	16.046937942504883
1608236219.072961	68	17.238462448120117
1608237669.7344677	69	15.746341705322266
1608239162.1816897	70	17.13421058654785
1608240661.8627725	71	15.75106430053711
1608242137.373646	72	-0.6000000238418579
1608243607.175643	73	15.413793563842773
1608245080.7208843	74	15.574545860290527
1608246572.3059523	75	14.657142639160156
1608248026.084608	76	15.467857360839844
1608249508.4353762	77	15.809433937072754
1608250982.8446145	78	11.399999618530273
1608252435.7689033	79	14.256667137145996
1608253903.7064407	80	17.826086044311523
1608255368.5010943	81	17.133333206176758
1608256816.2877164	82	18.47307777404785
1608258294.0558057	83	16.624074935913086
1608259762.0890656	84	19.291303634643555
1608261204.461442	85	13.835293769836426
1608262647.816799	86	17.6200008392334
1608264117.9624846	87	17.877273559570312
1608265581.86752	88	18.710811614990234
1608267051.6204093	89	20.272092819213867
1608268518.5330994	90	15.773077011108398
1608269999.3097897	91	17.091304779052734
1608271494.1283534	92	18.88599967956543
1608272982.168839	93	14.534883499145508
1608274455.6738112	94	14.186666488647461
1608275938.531664	95	16.94186019897461
1608277434.1412182	96	14.425714492797852
1608278932.3770921	97	17.038000106811523
1608280409.0904737	98	18.14444351196289
1608281748.3606231	99	19.80487823486328
