# Supplementary material
Source: ML conference proceedings conference paper supplement (https://proceedings.mlr.press/v139/rahman21a.html)
Supplement: Supplementary file 3 [file rahman21a-supp.zip › ICMLSupportingDoc 2/Visualization/OpenFortAttackRes/EVAL/GPL/run-hskuwhhuur-tag-Rewards_eval.csv]

Wall time	Step	Value
1608145977.5983849	0	-5.085964679718018
1608147199.0356696	1	-3.3026316165924072
1608148431.088884	2	-6.284999847412109
1608149680.8083215	3	-2.6480000019073486
1608150936.1637852	4	-3.110203981399536
1608152175.421982	5	-6.804166793823242
1608153367.2826488	6	-3.450000047683716
1608154560.3588753	7	-2.492500066757202
1608155729.0090907	8	-5.178378582000732
1608156905.6456714	9	-3.0676469802856445
1608158118.3814368	10	-1.6339622735977173
1608159312.5028095	11	-2.6365854740142822
1608160514.9203238	12	-1.0657142400741577
1608161719.0456212	13	-1.3545454740524292
1608162900.9903054	14	-2.9749999046325684
1608164082.5165823	15	-1.8567568063735962
1608165264.281712	16	-2.164705991744995
1608166487.222664	17	0.05937499925494194
1608167687.6931138	18	-1.9777777194976807
1608168862.4646187	19	-2.484090805053711
1608170041.1201665	20	-1.850000023841858
1608171234.3692374	21	-0.36052632331848145
1608172434.3078501	22	-1.3847825527191162
1608173630.917061	23	0.6675675511360168
1608174817.9318862	24	-0.4588235318660736
1608176004.678664	25	-0.7069767713546753
1608177175.5767038	26	0.7099999785423279
1608178329.6871703	27	2.887096881866455
1608179504.1420524	28	-0.15806451439857483
1608180659.3082726	29	0.1534883677959442
1608181860.6883855	30	2.659374952316284
1608183060.4194417	31	0.8325581550598145
1608184249.189088	32	1.121212124824524
1608185424.660139	33	-0.17142857611179352
1608186602.8195317	34	3.6205883026123047
1608187763.7869608	35	2.971428632736206
1608188901.9195216	36	1.7826087474822998
1608190066.5215385	37	4.122000217437744
1608191579.1014273	38	6.25600004196167
1608193073.1398358	39	3.456818103790283
1608194570.5567486	40	2.866666555404663
1608196028.5655181	41	7.081481456756592
1608197496.8240933	42	-1.1727272272109985
1608198973.0286703	43	5.488571643829346
1608200438.5963733	44	11.240425109863281
1608201908.5839918	45	3.656818151473999
1608203355.6147704	46	10.648276329040527
1608204820.4290977	47	7.038636207580566
1608206273.8077428	48	-0.6470588445663452
1608207732.138774	49	9.244736671447754
1608209171.9655445	50	5.567999839782715
1608210616.759323	51	11.039999961853027
1608212083.804713	52	10.136841773986816
1608213547.5093143	53	8.1899995803833
1608215000.2001748	54	9.470833778381348
1608216445.0544667	55	11.428125381469727
1608217891.9467947	56	9.411765098571777
1608219345.27523	57	-2.0916666984558105
1608220795.37777	58	2.16585373878479
1608222254.2774541	59	8.407691955566406
1608223683.7068925	60	15.127586364746094
1608225138.8068442	61	13.745454788208008
1608226604.9790292	62	9.399999618530273
1608228078.1387093	63	14.224444389343262
1608229534.2329354	64	11.283870697021484
1608230995.1379118	65	16.906896591186523
1608232443.2154388	66	11.823728561401367
1608233871.2483191	67	13.826666831970215
1608235308.0319977	68	11.637499809265137
1608236749.03776	69	13.89230728149414
1608238196.6492362	70	12.399999618530273
1608239636.6682084	71	-0.4363636374473572
1608241081.71101	72	13.612244606018066
1608242520.947423	73	11.796226501464844
1608243953.6123073	74	7.72820520401001
1608245381.9928596	75	16.15142822265625
1608246830.9705453	76	15.197916984558105
1608248269.6197243	77	15.65333366394043
1608249728.5188577	78	12.443635940551758
1608251172.4071205	79	12.868965148925781
1608252620.722812	80	12.632352828979492
1608254072.1793962	81	11.575555801391602
1608255529.1571643	82	11.865714073181152
1608256974.1130888	83	12.466666221618652
1608258420.5477936	84	17.158973693847656
1608259846.7060144	85	8.771052360534668
1608261271.6633713	86	12.104762077331543
1608262691.4336967	87	11.342857360839844
1608264164.5301852	88	13.71379280090332
1608265625.1281798	89	19.065000534057617
1608267064.923934	90	13.872221946716309
1608268520.808252	91	17.0
1608269974.0481145	92	15.425806045532227
1608271413.8075955	93	15.029999732971191
1608272866.6605334	94	11.687179565429688
1608274320.579302	95	15.551922798156738
1608275755.3687766	96	15.581818580627441
1608277184.7587683	97	14.574193954467773
1608278614.789077	98	12.067646980285645
1608280057.685868	99	18.10416603088379
