# Supplementary material
Source: ML conference proceedings conference paper supplement (https://proceedings.mlr.press/v139/rahman21a.html)
Supplement: Supplementary file 3 [file rahman21a-supp.zip › ICMLSupportingDoc 2/Visualization/OpenFortAttackRes/EVAL/GPL/run-qtlecpmdup-tag-Rewards_eval.csv]

Wall time	Step	Value
1608145965.7374032	0	-3.442857027053833
1608147222.5731013	1	-4.953333377838135
1608148479.187506	2	-1.1485713720321655
1608149698.4018111	3	-3.8205127716064453
1608150884.6463764	4	-5.847727298736572
1608152076.3446198	5	-2.3111112117767334
1608153278.8148582	6	-3.034782648086548
1608154475.813203	7	-2.710256338119507
1608155684.6784089	8	-3.4945945739746094
1608156888.14665	9	-1.6542856693267822
1608158082.755496	10	-2.7697675228118896
1608159281.8052957	11	-5.709523677825928
1608160505.3408937	12	-0.715624988079071
1608161731.2479298	13	-2.0717391967773438
1608162951.0539517	14	-1.6179487705230713
1608164161.1458468	15	-3.4042553901672363
1608165355.6792817	16	-1.5047619342803955
1608166552.8925602	17	-1.7428570985794067
1608167718.5604124	18	-3.371875047683716
1608168928.1083267	19	0.07916666567325592
1608170131.224565	20	-1.6934782266616821
1608171335.1756072	21	0.30000001192092896
1608172511.591158	22	1.0516128540039062
1608173691.9760988	23	-1.3191488981246948
1608174872.0224895	24	-1.663888931274414
1608176036.5683045	25	0.8918918967247009
1608177199.181484	26	2.4673078060150146
1608178356.926998	27	1.6795454025268555
1608179521.561099	28	0.8849999904632568
1608180674.9051516	29	2.7485713958740234
1608181802.1091993	30	4.255263328552246
1608182939.2143242	31	1.6053571701049805
1608184071.8872526	32	6.4708333015441895
1608185213.2524874	33	-2.4083333015441895
1608186377.2971997	34	1.899999976158142
1608187540.432035	35	5.236363410949707
1608188684.2478878	36	5.069047451019287
1608189827.1586294	37	7.415789604187012
1608191272.161336	38	4.296551704406738
1608192774.3479555	39	6.422857284545898
1608194280.4880385	40	8.949999809265137
1608195768.178959	41	6.856862545013428
1608197242.7048664	42	7.518518447875977
1608198701.703089	43	11.415789604187012
1608200196.1846762	44	8.44473648071289
1608201663.8068044	45	12.657999992370605
1608203152.5603676	46	14.752381324768066
1608204604.8369951	47	8.892499923706055
1608206052.9294481	48	13.668571472167969
1608207507.5919921	49	12.255999565124512
1608208961.615373	50	12.428947448730469
1608210411.6299772	51	12.09024429321289
1608211867.7674332	52	13.203125
1608213321.5212765	53	13.825581550598145
1608214725.0068343	54	10.84117603302002
1608216151.1757889	55	11.221212387084961
1608217588.2152991	56	13.986000061035156
1608219031.9521945	57	13.30384635925293
1608220475.6730533	58	10.133333206176758
1608221937.0741432	59	17.169565200805664
1608223376.9825635	60	12.115385055541992
1608224826.548508	61	17.6560001373291
1608226271.4532428	62	16.823076248168945
1608227724.2070415	63	11.755882263183594
1608229145.3433278	64	15.9399995803833
1608230585.9881866	65	14.034375190734863
1608232027.1482818	66	18.826086044311523
1608233459.1024766	67	16.22758674621582
1608234905.6985836	68	16.81489372253418
1608236357.3299634	69	14.818750381469727
1608237793.3668106	70	18.051063537597656
1608239241.685886	71	15.631817817687988
1608240663.7781706	72	15.129032135009766
1608242091.1735063	73	14.448718070983887
1608243519.511101	74	19.481481552124023
1608244941.3418396	75	15.216129302978516
1608246388.4464939	76	1.7666666507720947
1608247860.8837945	77	7.6447367668151855
1608249312.8229067	78	17.656097412109375
1608250777.999601	79	18.52142906188965
1608252193.5977974	80	15.475862503051758
1608253592.1900291	81	15.607142448425293
1608254999.2461689	82	15.503030776977539
1608256441.8625178	83	14.223999977111816
1608257870.7002401	84	20.662500381469727
1608259295.8495736	85	1.8727272748947144
1608260729.4157796	86	16.213043212890625
1608262164.14784	87	16.843334197998047
1608263623.4909482	88	12.702702522277832
1608265061.233479	89	14.82758617401123
1608266498.71475	90	13.738235473632812
1608267931.8928006	91	5.572727203369141
1608269363.609306	92	16.365516662597656
1608270809.2693493	93	18.678430557250977
1608272242.764574	94	17.502500534057617
1608273694.5389483	95	16.386667251586914
1608275133.5958598	96	21.62173843383789
1608276564.2548087	97	12.448484420776367
1608277994.5615232	98	20.112499237060547
1608279436.752767	99	14.516129493713379
