# Supplementary material
Source: ML conference proceedings conference paper supplement (https://proceedings.mlr.press/v139/rahman21a.html)
Supplement: Supplementary file 3 [file rahman21a-supp.zip › ICMLSupportingDoc 2/Visualization/OpenFortAttackRes/EVAL/GPL/run-uayijodpyi-tag-Rewards_eval.csv]

Wall time	Step	Value
1608145976.1583326	0	-3.8399999141693115
1608147231.2384386	1	-6.130434989929199
1608148497.4507995	2	-3.0428571701049805
1608149765.2751803	3	-3.0625
1608151036.3920698	4	-5.561764717102051
1608152308.037323	5	-4.267742156982422
1608153571.9241302	6	-2.6903226375579834
1608154825.5301716	7	-4.231428623199463
1608156082.0207853	8	-0.8538461327552795
1608157351.9421475	9	-1.5041667222976685
1608158629.228697	10	-2.341463327407837
1608159832.0695562	11	-2.506122350692749
1608161035.7755778	12	-7.224999904632568
1608162220.3528702	13	-3.3973684310913086
1608163418.3522558	14	-1.7843749523162842
1608164602.8281796	15	-1.9241379499435425
1608165781.5642717	16	-0.511904776096344
1608166980.7789583	17	-5.56315803527832
1608168186.749559	18	0.808571457862854
1608169381.1762135	19	-3.920588254928589
1608170586.9818707	20	-2.059999942779541
1608171791.2109437	21	-1.0700000524520874
1608172995.3209386	22	-1.0027778148651123
1608174204.755056	23	1.4333332777023315
1608175415.1638944	24	-0.6484848260879517
1608176616.5910745	25	1.5236842632293701
1608177778.1765714	26	2.332608699798584
1608178946.997761	27	0.6812499761581421
1608180124.0460377	28	3.5
1608181290.2123518	29	-0.699999988079071
1608182453.407048	30	1.9810811281204224
1608183624.0130224	31	1.5204545259475708
1608184795.2438145	32	2.802325487136841
1608185957.0004954	33	3.4749999046325684
1608187126.0811765	34	2.5186047554016113
1608188290.4568164	35	2.434999942779541
1608189449.1732101	36	5.75
1608190792.2120538	37	4.2265305519104
1608192299.0828443	38	4.044444561004639
1608193808.9676435	39	8.050000190734863
1608195304.7817273	40	7.257692337036133
1608196788.580842	41	7.715384483337402
1608198279.825783	42	3.738461494445801
1608199757.87384	43	7.968627452850342
1608201239.945826	44	5.452381134033203
1608202724.7959716	45	8.795744895935059
1608204196.8637667	46	12.193103790283203
1608205648.2557297	47	10.07317066192627
1608207112.6832387	48	12.092000007629395
1608208566.691246	49	11.245945930480957
1608210010.295504	50	12.685964584350586
1608211461.6027656	51	15.183720588684082
1608212927.8870187	52	10.085000038146973
1608214375.284854	53	9.780555725097656
1608215835.2793818	54	12.821568489074707
1608217294.716242	55	12.420929908752441
1608218729.7288125	56	10.482500076293945
1608220168.4769473	57	13.65666675567627
1608221610.5879316	58	15.191666603088379
1608223037.4422774	59	8.646428108215332
1608224471.3556008	60	14.881632804870605
1608225883.403879	61	13.266666412353516
1608227319.0903933	62	12.255172729492188
1608228778.0798216	63	10.842857360839844
1608230213.4271097	64	11.672222137451172
1608231647.902353	65	17.489286422729492
1608233093.9517546	66	10.370588302612305
1608234547.150389	67	15.125
1608236005.6383045	68	15.476086616516113
1608237447.6897733	69	13.510869979858398
1608238919.0327897	70	15.737500190734863
1608240409.4752934	71	19.0
1608241865.3426437	72	17.924999237060547
1608243340.334648	73	13.605999946594238
1608244764.7530472	74	14.793181419372559
1608246224.5346878	75	15.35200023651123
1608247684.8054504	76	19.17608642578125
1608249131.1057746	77	14.082758903503418
1608250546.6188931	78	9.272414207458496
1608251950.8644617	79	10.920000076293945
1608253352.2761853	80	12.38888931274414
1608254745.576042	81	15.45714282989502
1608256174.6583717	82	14.81224536895752
1608257601.7104158	83	13.236734390258789
1608259040.840767	84	16.716129302978516
1608260476.5422268	85	11.116666793823242
1608261926.2564614	86	20.608928680419922
1608263368.601753	87	13.766666412353516
1608264793.4684289	88	18.551666259765625
1608266216.3557622	89	16.704256057739258
1608267649.0747283	90	22.028947830200195
1608269100.4309247	91	17.351999282836914
1608270567.1477509	92	16.840909957885742
1608272009.826477	93	15.321428298950195
1608273478.6887703	94	14.451282501220703
1608274958.0691924	95	13.816666603088379
1608276444.0805511	96	14.471875190734863
1608277940.3238072	97	15.987096786499023
1608279420.1531115	98	12.724138259887695
1608280865.480133	99	15.693750381469727
