# Supplementary material
Source: ML conference proceedings conference paper supplement (https://proceedings.mlr.press/v139/rahman21a.html)
Supplement: Supplementary file 3 [file rahman21a-supp.zip › ICMLSupportingDoc 2/Visualization/OpenFortAttackRes/EVAL/GPL/run-yizhipnhxk-tag-Rewards_eval.csv]

Wall time	Step	Value
1608145980.8670466	0	-8.035714149475098
1608147262.273199	1	-4.233333110809326
1608148523.002671	2	-5.497142791748047
1608149749.7969856	3	-3.5372092723846436
1608150972.739014	4	-1.7860465049743652
1608152204.9953485	5	-3.2510204315185547
1608153436.6711226	6	-2.9088234901428223
1608154665.6404915	7	-2.9358973503112793
1608155924.2169747	8	-1.5736842155456543
1608157163.7910662	9	-3.4365854263305664
1608158402.7916024	10	-4.5625
1608159663.4018052	11	-5.854166507720947
1608160929.248908	12	-1.0129032135009766
1608162201.2663295	13	-0.30000001192092896
1608163471.5507991	14	-1.5297871828079224
1608164715.647015	15	-0.4346153736114502
1608165930.9783301	16	1.1228570938110352
1608167145.7649925	17	-1.6333333253860474
1608168347.4927962	18	0.19428572058677673
1608169577.6511412	19	-5.3808512687683105
1608170772.9388633	20	-3.0433332920074463
1608171976.8118567	21	-1.3756097555160522
1608173196.2882278	22	-4.5625
1608174406.6067965	23	-1.8472222089767456
1608175584.0478554	24	-0.41428571939468384
1608176780.06699	25	-0.774193525314331
1608177963.5256972	26	0.5615384578704834
1608179151.5697687	27	-0.6785714030265808
1608180348.7682393	28	-0.07708333432674408
1608181547.0723505	29	0.8444444537162781
1608182730.6927571	30	0.4729166626930237
1608183928.546897	31	1.6027777194976807
1608185105.8443837	32	-1.4227272272109985
1608186299.0524879	33	0.9039215445518494
1608187467.6558082	34	3.2542858123779297
1608188617.8244436	35	-0.7446808218955994
1608189769.9857154	36	2.2083332538604736
1608191240.032797	37	2.0722222328186035
1608192798.8820677	38	7.239999771118164
1608194330.5788171	39	2.784374952316284
1608195837.4915302	40	3.943589687347412
1608197355.4841046	41	1.6277778148651123
1608198871.297082	42	6.465217590332031
1608200411.842796	43	4.824999809265137
1608201948.6874113	44	1.7454545497894287
1608203477.243895	45	-2.0928571224212646
1608205000.0613837	46	7.269811153411865
1608206504.4381752	47	8.866666793823242
1608207993.15815	48	1.056666612625122
1608209473.6403184	49	9.10689640045166
1608210961.8552668	50	11.57272720336914
1608212454.3071563	51	7.1724138259887695
1608213951.5362809	52	9.409090995788574
1608215411.4352891	53	11.975000381469727
1608216886.5420277	54	16.024490356445312
1608218350.0402102	55	13.811111450195312
1608219802.5343096	56	10.414545059204102
1608221256.6509914	57	10.422857284545898
1608222714.8655965	58	15.122413635253906
1608224158.7996063	59	12.345946311950684
1608225620.064029	60	10.550000190734863
1608227085.3274722	61	12.134782791137695
1608228581.2305171	62	15.026190757751465
1608230042.0538697	63	11.614285469055176
1608231506.7001524	64	15.602272987365723
1608232950.5677168	65	11.837930679321289
1608234427.86749	66	18.347999572753906
1608235894.2626195	67	-4.353061199188232
1608237333.2934697	68	11.29230785369873
1608238802.3612053	69	14.75882339477539
1608240274.6148012	70	13.986363410949707
1608241753.611597	71	17.923404693603516
1608243211.600444	72	17.408510208129883
1608244642.6869924	73	10.679411888122559
1608246096.209208	74	11.227907180786133
1608247556.0930178	75	19.7318172454834
1608249005.5504906	76	14.183333396911621
1608250449.6399527	77	13.09705924987793
1608251899.3091736	78	18.111364364624023
1608253315.2658086	79	13.584375381469727
1608254717.233702	80	14.451162338256836
1608256146.6786957	81	10.6875
1608257589.3022995	82	14.017646789550781
1608259024.4748075	83	13.566666603088379
1608260452.7303307	84	20.91395378112793
1608261892.0072856	85	12.262222290039062
1608263336.8836653	86	16.537500381469727
1608264759.0605898	87	14.537500381469727
1608266166.5654647	88	17.241304397583008
1608267590.9443772	89	13.46129035949707
1608269014.443641	90	15.573529243469238
1608270469.269461	91	18.27400016784668
1608271931.3164911	92	17.5766658782959
1608273392.1824112	93	15.682978630065918
1608274844.9957025	94	15.76451587677002
1608276293.3930712	95	12.496295928955078
1608277743.7344685	96	18.12826156616211
1608279199.9680195	97	15.070588111877441
1608280611.6225693	98	0.011111111380159855
1608281879.1426516	99	15.727659225463867
