# Supplementary material
Source: ML conference proceedings conference paper supplement (https://proceedings.mlr.press/v139/rahman21a.html)
Supplement: Supplementary file 3 [file rahman21a-supp.zip › ICMLSupportingDoc 2/Visualization/OpenFortAttackRes/TRAIN/DGN-MARL/run-.-tag-Rewards_adhoc_train.csv]

Wall time	Step	Value
1611071744.2659316	0	-6.324390411376953
1611072877.1971366	50	-5.136170387268066
1611074018.6770825	100	-5.411627769470215
1611075166.697888	150	-4.461764812469482
1611076323.9143662	200	-2.8964285850524902
1611077473.454456	250	-4.3289475440979
1611078626.4553168	300	-5.797872543334961
1611079762.690674	350	-4.514705657958984
1611080907.9391515	400	-5.178787708282471
1611082034.631374	450	-3.9558823108673096
1611083172.086905	500	-5.041463375091553
1611084320.299415	550	-4.278260707855225
1611085468.6709726	600	-5.408888816833496
1611086616.173573	650	-4.666666507720947
1611087755.637927	700	-4.494285583496094
1611088891.8414369	750	-5.1777777671813965
1611090035.515307	800	-5.66829252243042
1611091169.4008324	850	-4.976470470428467
1611092309.7347443	900	-4.728947162628174
1611093440.1986258	950	-4.233333110809326
1611094580.3091114	1000	-6.15749979019165
1611095713.3292148	1050	-5.400000095367432
1611096848.7519798	1100	-6.657894611358643
1611097990.0648768	1150	-3.5326530933380127
1611099139.356079	1200	-5.6183671951293945
1611100268.9076607	1250	-5.0837836265563965
1611101419.9673004	1300	-3.1470587253570557
1611102556.1551034	1350	-4.597222328186035
1611103696.9700162	1400	-4.242105484008789
1611104832.340212	1450	-4.0
1611105966.343313	1500	-3.28125
1611107116.919072	1550	-3.264444351196289
1611108254.128496	1600	-4.30222225189209
1611109381.6952317	1650	-5.6976189613342285
1611110508.3815024	1700	-2.854285717010498
1611111657.2893481	1750	-3.095454454421997
1611112777.0854375	1800	-3.6649999618530273
1611113907.5539181	1850	-5.1052632331848145
1611115050.872957	1900	-3.4000000953674316
1611116180.5987334	1950	-2.951162815093994
1611117311.3544667	2000	-3.442500114440918
1611118471.3367379	2050	-2.4639999866485596
1611119613.989726	2100	-3.6488888263702393
1611120762.296107	2150	-5.083721160888672
1611121888.1993217	2200	-3.8446807861328125
1611123009.372567	2250	-3.7074074745178223
1611124144.4274383	2300	-5.936110973358154
1611125287.8075716	2350	-2.9000000953674316
1611126432.6710305	2400	-3.4384615421295166
1611127576.1746998	2450	-0.4306122362613678
1611128717.7430093	2500	-2.692500114440918
1611129853.1736019	2550	-3.53947377204895
1611131000.048162	2600	-4.508771896362305
1611132149.0941558	2650	-2.9692306518554688
1611133280.476846	2700	-4.726315975189209
1611134429.0512617	2750	-4.293749809265137
1611135584.0290895	2800	-0.758695662021637
1611136705.7769065	2850	-7.4588236808776855
1611137856.0584056	2900	-4.109090805053711
1611138995.0808077	2950	-2.993103504180908
1611140145.3039365	3000	-2.436842203140259
1611141310.3226554	3050	-2.8870370388031006
1611142470.189484	3100	-1.3918367624282837
1611143624.054686	3150	-3.9800000190734863
1611144758.6071744	3200	-2.651515245437622
1611145895.0882263	3250	-5.805660247802734
1611147050.4737492	3300	-3.739215612411499
1611148200.3578448	3350	-3.9283018112182617
1611149341.3660607	3400	-2.0410256385803223
1611150493.6583686	3450	-5.371110916137695
1611151639.376149	3500	-3.066666603088379
1611152781.7996686	3550	-2.8611111640930176
1611153931.9659274	3600	-2.7261905670166016
1611155077.769481	3650	-5.003703594207764
1611156218.6329188	3700	-2.922222137451172
1611157359.8168085	3750	-1.615625023841858
1611158482.4800997	3800	-4.916666507720947
1611159608.388136	3850	-5.4685187339782715
1611160748.6091466	3900	-3.415384531021118
1611161891.7074654	3950	-2.556410312652588
1611163036.649672	4000	-1.0370370149612427
1611164185.653984	4050	-3.2804348468780518
1611165316.8094656	4100	-3.5911765098571777
1611166445.8065653	4150	-3.1974358558654785
1611167578.0268471	4200	-1.8414634466171265
1611168715.7736123	4250	-0.31562501192092896
1611169862.8441308	4300	-2.7852940559387207
1611171013.8056054	4350	-3.197561025619507
1611172154.5191813	4400	-3.2324323654174805
1611173291.024163	4450	-3.34883713722229
1611174435.0054634	4500	-3.7461538314819336
1611175588.3792927	4550	-4.504444599151611
1611176708.243938	4600	-4.110000133514404
1611177845.2736127	4650	-4.090909004211426
1611178981.4117079	4700	-4.415217399597168
1611180111.8414428	4750	-4.69069766998291
1611181240.791949	4800	-3.392307758331299
1611182360.4150963	4850	-5.647368431091309
1611183476.53071	4900	-4.386486530303955
1611184612.9328027	4950	-4.254054069519043
1611185739.6126654	5000	-3.690000057220459
