# Supplementary material
Source: ML conference proceedings conference paper supplement (https://proceedings.mlr.press/v139/rahman21a.html)
Supplement: Supplementary file 3 [file rahman21a-supp.zip › ICMLSupportingDoc 2/Visualization/OpenFortAttackRes/TRAIN/DGN-MARL/run-.-tag-Rewards_adhoc_train2.csv]

Wall time	Step	Value
1611071759.2664278	0	-5.240540504455566
1611072897.6372683	50	-6.314285755157471
1611074058.2050788	100	-4.848979473114014
1611075207.0925517	150	-6.1533331871032715
1611076360.957847	200	-8.039999961853027
1611077503.9459095	250	-6.221568584442139
1611078660.766706	300	-6.441463470458984
1611079824.2737381	350	-5.174285888671875
1611080977.635715	400	-5.675609588623047
1611082116.9380593	450	-7.538095474243164
1611083264.1511235	500	-4.965116500854492
1611084400.142982	550	-5.75
1611085548.6172018	600	-5.85609769821167
1611086690.9154608	650	-8.205263137817383
1611087813.579165	700	-8.666666984558105
1611088946.966129	750	-4.842857360839844
1611090095.7682378	800	-4.668889045715332
1611091230.4852915	850	-5.342424392700195
1611092369.408092	900	-3.3724138736724854
1611093505.3925421	950	-2.3107142448425293
1611094644.515089	1000	-5.164102554321289
1611095780.0537772	1050	-7.951428413391113
1611096922.0477796	1100	-4.864706039428711
1611098066.8985553	1150	-5.275000095367432
1611099206.069239	1200	-3.082608699798584
1611100350.8761096	1250	-4.494736671447754
1611101478.287825	1300	-3.8466665744781494
1611102623.7368848	1350	-7.635293960571289
1611103761.8375657	1400	-3.549999952316284
1611104899.0172427	1450	-4.824999809265137
1611106031.4789093	1500	-4.563333511352539
1611107162.586351	1550	-2.9076921939849854
1611108295.7118	1600	-3.977083444595337
1611109423.6594782	1650	-5.424138069152832
1611110556.6771798	1700	-3.6159090995788574
1611111695.5165904	1750	-4.992000102996826
1611112822.009608	1800	-5.029411792755127
1611113960.740377	1850	-4.237735748291016
1611115091.9808433	1900	-4.439473628997803
1611116224.4698431	1950	-4.844230651855469
1611117357.1169195	2000	-3.610344886779785
1611118499.7706885	2050	-2.759999990463257
1611119634.927704	2100	-2.8933334350585938
1611120775.688956	2150	-2.362499952316284
1611121925.3503096	2200	-3.545454502105713
1611123053.1969757	2250	-3.3303029537200928
1611124197.3220203	2300	-5.303225994110107
1611125331.5924945	2350	-4.985714435577393
1611126473.8223603	2400	-3.168181896209717
1611127617.0559177	2450	-5.3606061935424805
1611128757.3451781	2500	-4.090243816375732
1611129901.9007974	2550	-3.024242401123047
1611131047.0710886	2600	-5.53636360168457
1611132193.1520746	2650	-5.967567443847656
1611133346.4872792	2700	-2.9783782958984375
1611134478.7449698	2750	-4.280645370483398
1611135606.6859431	2800	-3.940000057220459
1611136759.838683	2850	-5.592105388641357
1611137912.0624592	2900	-4.626315593719482
1611139059.0603783	2950	-5.087179660797119
1611140197.7115438	3000	-3.4755101203918457
1611141336.2565484	3050	-5.166666507720947
1611142493.189928	3100	-5.312121391296387
1611143636.6681776	3150	-4.561764717102051
1611144782.9786737	3200	-4.237037181854248
1611145925.9093127	3250	-3.5805554389953613
1611147049.5177202	3300	-3.5439023971557617
1611148189.4914587	3350	-1.7166666984558105
1611149337.509358	3400	-4.961224555969238
1611150486.8227134	3450	-3.0090909004211426
1611151653.0757039	3500	-4.107316970825195
1611152792.5622895	3550	-2.6696970462799072
1611153936.766273	3600	-4.11162805557251
1611155101.8309522	3650	-5.53125
1611156262.640313	3700	-5.154838562011719
1611157425.250306	3750	-4.742424011230469
1611158584.2011366	3800	-4.771111011505127
1611159747.2219515	3850	-3.3545453548431396
1611160899.459458	3900	-4.190384387969971
1611162044.877134	3950	-1.618749976158142
1611163187.8806887	4000	-4.945714473724365
1611164343.6572356	4050	-3.427500009536743
1611165497.3163705	4100	-3.5999999046325684
1611166655.8882542	4150	-6.515999794006348
1611167830.499607	4200	-4.587878704071045
1611168978.321623	4250	-3.994285821914673
1611170147.8955922	4300	-3.4133334159851074
1611171317.3666706	4350	-7.012499809265137
1611172490.0015914	4400	-4.008108139038086
1611173654.4857838	4450	-7.1181817054748535
1611174812.4454088	4500	-7.0
1611175984.8755782	4550	-4.531707286834717
1611177157.5461156	4600	-3.2432432174682617
1611178336.807384	4650	-3.1500000953674316
1611179496.9135504	4700	-6.729411602020264
1611180660.5874314	4750	-4.402439117431641
1611181826.8714638	4800	-3.5926828384399414
1611182994.1663013	4850	-4.793939590454102
1611184179.8192778	4900	-3.630232572555542
1611185340.6896558	4950	-2.4000000953674316
1611186224.3499973	5000	-2.759999990463257
