# Supplementary material
Source: ML conference proceedings conference paper supplement (https://proceedings.mlr.press/v139/rahman21a.html)
Supplement: Supplementary file 3 [file rahman21a-supp.zip › ICMLSupportingDoc 2/Visualization/OpenFortAttackRes/TRAIN/DGN-MARL/run-.-tag-Rewards_adhoc_train3.csv]

Wall time	Step	Value
1611071767.290344	0	-5.5625
1611072912.9720676	50	-7.5239129066467285
1611074060.0405777	100	-5.225714206695557
1611075209.0287073	150	-5.781818389892578
1611076354.4691129	200	-5.361363410949707
1611077512.0157094	250	-6.578260898590088
1611078657.8981965	300	-5.924489974975586
1611079794.4699225	350	-7.099999904632568
1611080945.5172143	400	-5.853488445281982
1611082101.1394136	450	-5.269047737121582
1611083257.31085	500	-5.111904621124268
1611084401.3587828	550	-6.331250190734863
1611085549.0632987	600	-5.6693878173828125
1611086690.4775305	650	-6.285714149475098
1611087849.506334	700	-5.133333206176758
1611089014.3161952	750	-6.439024448394775
1611090166.770967	800	-4.325806617736816
1611091322.0087175	850	-3.247499942779541
1611092460.952774	900	-2.6549999713897705
1611093605.2990577	950	-3.48888897895813
1611094753.12447	1000	-2.569444417953491
1611095900.6825633	1050	-3.5473685264587402
1611097037.173208	1100	-3.7121212482452393
1611098184.2703214	1150	-3.870270252227783
1611099327.9949684	1200	-2.63611102104187
1611100451.0503538	1250	-4.636585235595703
1611101600.1883333	1300	-2.502272844314575
1611102744.282077	1350	-3.96486496925354
1611103884.2375531	1400	-3.9589743614196777
1611105026.6928265	1450	-3.3578946590423584
1611106178.6392064	1500	-2.630232572555542
1611107329.1164117	1550	-2.1571428775787354
1611108475.9892917	1600	-1.7255319356918335
1611109622.3004842	1650	-3.1621620655059814
1611110770.4232776	1700	-3.123076915740967
1611111888.2090673	1750	-4.890322685241699
1611113012.3250313	1800	-1.913636326789856
1611114151.8635561	1850	-3.357142925262451
1611115308.9744139	1900	-2.984999895095825
1611116446.3034666	1950	-3.516326427459717
1611117578.7293327	2000	-3.7952380180358887
1611118711.0340388	2050	-4.2292680740356445
1611119862.3823173	2100	-2.3770833015441895
1611121003.2401738	2150	-3.279487133026123
1611122137.8896117	2200	-4.146666526794434
1611123280.4806795	2250	-1.7842105627059937
1611124425.736477	2300	-2.9675676822662354
1611125584.2210138	2350	-1.4244444370269775
1611126737.2443476	2400	-4.099999904632568
1611127882.1115184	2450	-2.9911763668060303
1611129027.628302	2500	-4.134883880615234
1611130165.3162563	2550	-4.665714263916016
1611131302.1436641	2600	-4.431707382202148
1611132430.84728	2650	-3.4049999713897705
1611133585.845024	2700	-3.962069034576416
1611134713.9933157	2750	-4.725641250610352
1611135851.5843134	2800	-3.3333332538604736
1611136975.2495594	2850	-2.5428571701049805
1611138112.2868364	2900	-3.133333444595337
1611139261.5530975	2950	-4.472972869873047
1611140407.9651237	3000	-2.1224489212036133
1611141537.7754846	3050	-4.361363410949707
1611142677.4952893	3100	-2.2200000286102295
1611143824.714462	3150	-3.069230794906616
1611144960.7605247	3200	-4.704877853393555
1611146100.464598	3250	-3.8111112117767334
1611147250.9427233	3300	-0.5113636255264282
1611148396.1518278	3350	-1.3605263233184814
1611149557.052364	3400	-4.400000095367432
1611150700.5250032	3450	-2.4793102741241455
1611151827.1798563	3500	-3.3575000762939453
1611152973.8122208	3550	-2.3842105865478516
1611154094.567578	3600	-2.753124952316284
1611155215.228521	3650	-4.0
1611156344.414501	3700	-2.0756757259368896
1611157483.2072423	3750	-3.69189190864563
1611158615.3548615	3800	-4.90238094329834
1611159749.2219899	3850	-2.1666667461395264
1611160861.7995014	3900	-2.4352941513061523
1611161983.8905978	3950	-1.01714289188385
1611163120.251443	4000	-3.4777777194976807
1611164261.828202	4050	-4.306976795196533
1611165386.9850702	4100	-2.9886362552642822
1611166507.0880487	4150	-1.939130425453186
1611167639.53694	4200	-3.965853691101074
1611168782.2923434	4250	-2.0333333015441895
1611169911.2749305	4300	-5.213953495025635
1611171024.8218575	4350	-3.2276594638824463
1611172147.6207654	4400	-3.9054055213928223
1611173261.3423064	4450	-2.1488888263702393
1611174381.6800241	4500	-4.3085713386535645
1611175504.7133803	4550	-3.7354166507720947
1611176634.6494641	4600	-5.508510589599609
1611177760.1711428	4650	-2.038461446762085
1611178886.0611668	4700	-3.4674417972564697
1611180016.412221	4750	-1.0441176891326904
1611181159.467439	4800	0.5375000238418579
1611182287.160321	4850	-2.4555554389953613
1611183405.4419339	4900	-1.004347801208496
1611184536.1675441	4950	-2.715789556503296
1611185666.6223638	5000	-3.0411765575408936
