# Supplementary material
Source: ML conference proceedings conference paper supplement (https://proceedings.mlr.press/v139/rahman21a.html)
Supplement: Supplementary file 3 [file rahman21a-supp.zip › ICMLSupportingDoc 2/Visualization/OpenFortAttackRes/TRAIN/DGN-MARL/run-.-tag-Rewards_adhoc_train4.csv]

Wall time	Step	Value
1611071782.7357845	0	-7.474999904632568
1611072960.905809	50	-6.677083492279053
1611074115.5558307	100	-5.295652389526367
1611075278.948277	150	-5.918181896209717
1611076455.9611127	200	-4.365116119384766
1611077619.8259084	250	-6.048387050628662
1611078766.195096	300	-4.375675678253174
1611079915.7477188	350	-4.9488372802734375
1611081074.417639	400	-4.603921413421631
1611082220.58925	450	-5.623912811279297
1611083350.720189	500	-3.859999895095825
1611084488.4002037	550	-3.9800000190734863
1611085652.2601264	600	-2.6244897842407227
1611086811.4919722	650	-4.762962818145752
1611087959.4745362	700	-5.40217399597168
1611089110.8205664	750	-2.0519230365753174
1611090251.403178	800	-5.516216278076172
1611091401.2765317	850	-2.5568182468414307
1611092552.6798165	900	-4.158139705657959
1611093697.1132574	950	-3.9236841201782227
1611094826.824714	1000	-4.748648643493652
1611095964.6184108	1050	-3.9105262756347656
1611097094.1011229	1100	-4.892857074737549
1611098236.6934495	1150	-2.4660000801086426
1611099375.41565	1200	-3.6232142448425293
1611100501.6665943	1250	-5.07111120223999
1611101633.03707	1300	-4.354545593261719
1611102780.609997	1350	-3.069047689437866
1611103930.3091462	1400	-1.7833333015441895
1611105072.9867938	1450	-1.5800000429153442
1611106219.7999136	1500	-5.909999847412109
1611107355.5930903	1550	-5.137777805328369
1611108479.0408225	1600	-5.613636493682861
1611109622.306678	1650	-4.558536529541016
1611110751.0598087	1700	-3.799999952316284
1611111887.1617439	1750	-4.5241379737854
1611113016.045072	1800	-3.862499952316284
1611114133.851886	1850	-5.641666889190674
1611115252.4362793	1900	-4.759183883666992
1611116392.7193975	1950	-4.028888702392578
1611117538.07374	2000	-3.5446808338165283
1611118684.804735	2050	-2.989473581314087
1611119818.7283883	2100	-5.751282215118408
1611120942.3351247	2150	-6.8125
1611122065.610092	2200	-4.705882549285889
1611123193.2246096	2250	-1.7760869264602661
1611124327.7462466	2300	-4.7137932777404785
1611125465.3500724	2350	-3.945714235305786
1611126596.882841	2400	-4.2585368156433105
1611127717.0963678	2450	-6.262499809265137
1611128861.2258117	2500	-3.5457143783569336
1611129994.8995233	2550	-4.275000095367432
1611131140.1964643	2600	-4.759615421295166
1611132301.1756186	2650	-3.327500104904175
1611133437.941899	2700	-3.819999933242798
1611134605.3761716	2750	-3.167567491531372
1611135755.22693	2800	-3.0410256385803223
1611136896.0445127	2850	-6.03249979019165
1611138038.812816	2900	-3.548888921737671
1611139168.229269	2950	-2.640000104904175
1611140293.4575665	3000	-4.3371429443359375
1611141428.1556568	3050	-3.9590909481048584
1611142572.7221048	3100	-4.2133331298828125
1611143722.1727636	3150	-3.473170757293701
1611144872.7115679	3200	-4.293333530426025
1611146024.3623948	3250	-3.16585373878479
1611147178.5009785	3300	-1.8047618865966797
1611148322.6167462	3350	-4.6477274894714355
1611149449.1902025	3400	-3.654761791229248
1611150592.77373	3450	-4.815000057220459
1611151720.4814487	3500	-2.0729730129241943
1611152872.589416	3550	-1.929411768913269
1611154028.709687	3600	-4.161110877990723
1611155200.6268559	3650	-6.13265323638916
1611156370.6771488	3700	-1.9478260278701782
1611157519.3946831	3750	-5.465384483337402
1611158689.247336	3800	-2.5473685264587402
1611159848.0073895	3850	-4.789795875549316
1611161018.6249797	3900	-1.5542857646942139
1611162166.7613285	3950	-3.52439022064209
1611163306.1278994	4000	-3.1736841201782227
1611164468.0953884	4050	-4.820000171661377
1611165629.596765	4100	-4.520930290222168
1611166757.053942	4150	-0.8428571224212646
1611167918.8145187	4200	-4.123255729675293
1611169060.098552	4250	-4.013157844543457
1611170198.6402817	4300	-7.184210300445557
1611171332.4187524	4350	-5.2673468589782715
1611172481.9846077	4400	-5.313043594360352
1611173629.2772853	4450	-4.867391109466553
1611174785.8508372	4500	-4.443243026733398
1611175931.888114	4550	-3.8512821197509766
1611177078.4654622	4600	-3.3694443702697754
1611178224.0284247	4650	-4.2272725105285645
1611179385.6035233	4700	-3.054285764694214
1611180535.334209	4750	-3.022857189178467
1611181674.3794115	4800	-5.016666889190674
1611182826.379831	4850	-5.552499771118164
1611183993.9564393	4900	-4.308888912200928
1611185147.6181738	4950	-0.9275861978530884
1611186138.890273	5000	-2.2266666889190674
