# Supplementary material
Source: ML conference proceedings conference paper supplement (https://proceedings.mlr.press/v139/rahman21a.html)
Supplement: Supplementary file 3 [file rahman21a-supp.zip › ICMLSupportingDoc 2/Visualization/OpenFortAttackRes/TRAIN/DGN-MARL/run-.-tag-Rewards_adhoc_train5.csv]

Wall time	Step	Value
1611071791.0503073	0	-8.399999618530273
1611072939.8133295	50	-7.1583333015441895
1611074083.9360776	100	-5.10277795791626
1611075235.8798432	150	-5.532352924346924
1611076400.590953	200	-4.9282050132751465
1611077560.9813523	250	-6.046000003814697
1611078709.4778922	300	-5.60606050491333
1611079871.4005876	350	-5.212194919586182
1611081013.3014874	400	-6.788888931274414
1611082154.1836505	450	-5.505555629730225
1611083298.4167607	500	-3.6708333492279053
1611084456.3600361	550	-2.492500066757202
1611085605.7052844	600	-2.6395833492279053
1611086757.915169	650	-3.1306121349334717
1611087907.1855307	700	-2.251281976699829
1611089061.237716	750	-2.8147058486938477
1611090197.2933788	800	-3.7282052040100098
1611091349.5997584	850	-3.0320000648498535
1611092507.2079787	900	-2.0904762744903564
1611093642.4293783	950	-2.0941176414489746
1611094793.217243	1000	-3.0978260040283203
1611095953.33591	1050	-2.5260000228881836
1611097098.3193598	1100	-2.070967674255371
1611098232.4964488	1150	-4.808888912200928
1611099376.75618	1200	-2.3359999656677246
1611100514.6551206	1250	-2.9439024925231934
1611101655.354029	1300	-3.1583333015441895
1611102790.4471009	1350	-5.6189188957214355
1611103929.6734354	1400	-3.78723406791687
1611105067.5292094	1450	-1.9478260278701782
1611106208.3185709	1500	-4.589130401611328
1611107343.1554947	1550	-3.977419376373291
1611108474.2593987	1600	-4.617647171020508
1611109614.0747259	1650	-1.775675654411316
1611110755.6405241	1700	-5.730000019073486
1611111886.3221529	1750	-4.992592811584473
1611113036.7480745	1800	-4.472972869873047
1611114179.9176385	1850	-4.150000095367432
1611115310.6958761	1900	-2.0971429347991943
1611116445.689452	1950	-2.881481409072876
1611117573.8061843	2000	-6.096551895141602
1611118719.6616223	2050	-4.002127647399902
1611119860.5604494	2100	-3.9179487228393555
1611120992.7632873	2150	-3.694117546081543
1611122136.3519714	2200	-2.2571427822113037
1611123303.3383121	2250	-1.0415093898773193
1611124462.2323859	2300	-4.129032135009766
1611125617.8261418	2350	-4.865909099578857
1611126758.2299159	2400	-6.135714054107666
1611127903.214143	2450	-2.2638888359069824
1611129051.686966	2500	-4.148717880249023
1611130199.0595517	2550	-4.1620001792907715
1611131338.957733	2600	-5.360000133514404
1611132477.313441	2650	-2.6816327571868896
1611133629.2014067	2700	-2.049999952316284
1611134765.878386	2750	-3.615999937057495
1611135899.9536254	2800	-0.918181836605072
1611137052.651947	2850	-3.546875
1611138194.3595502	2900	-3.0037035942077637
1611139335.3844697	2950	-4.260000228881836
1611140481.4878385	3000	-2.2538461685180664
1611141622.4928555	3050	-3.3351352214813232
1611142751.5276992	3100	-4.480434894561768
1611143920.1122954	3150	-1.290697693824768
1611145058.1371472	3200	-5.147916793823242
1611146191.6619742	3250	-1.3333333730697632
1611147344.318078	3300	-3.6972973346710205
1611148486.6997945	3350	-4.0435895919799805
1611149627.864494	3400	-3.1021738052368164
1611150759.9867544	3450	-4.063043594360352
1611151902.1683354	3500	-3.1263158321380615
1611153043.5871153	3550	-3.7517242431640625
1611154165.6531067	3600	-3.468965530395508
1611155315.7011924	3650	-1.3580645322799683
1611156464.3912137	3700	-1.1404255628585815
1611157608.059397	3750	-3.0357143878936768
1611158750.867159	3800	-3.26808500289917
1611159889.590077	3850	-2.954054117202759
1611161029.4480202	3900	-3.439393997192383
1611162185.4139836	3950	-3.606818199157715
1611163320.6875842	4000	-2.0999999046325684
1611164484.4840524	4050	-2.053333282470703
1611165643.0138643	4100	-2.200000047683716
1611166796.1350465	4150	-1.8307691812515259
1611167952.2368345	4200	-2.3813953399658203
1611169093.2090225	4250	-4.05555534362793
1611170241.8572652	4300	-4.774358749389648
1611171392.7087045	4350	-3.8423078060150146
1611172532.2780948	4400	-2.3324999809265137
1611173686.9038863	4450	-3.6534883975982666
1611174842.1978028	4500	-3.9527273178100586
1611175998.3870537	4550	-3.2567567825317383
1611177145.9200003	4600	-3.9269230365753174
1611178292.0701988	4650	-3.4166667461395264
1611179441.6729753	4700	-2.7727272510528564
1611180570.8011477	4750	-2.4000000953674316
1611181705.7250893	4800	-3.971794843673706
1611182835.604025	4850	-2.1480000019073486
1611183947.8161142	4900	-2.5
1611185071.3290117	4950	-3.242000102996826
1611186091.180526	5000	-2.3742856979370117
