# Supplementary material
Source: ML conference proceedings conference paper supplement (https://proceedings.mlr.press/v139/rahman21a.html)
Supplement: Supplementary file 3 [file rahman21a-supp.zip › ICMLSupportingDoc 2/Visualization/OpenFortAttackRes/TRAIN/DGN-MARL/run-.-tag-Rewards_adhoc_train6.csv]

Wall time	Step	Value
1611071813.0800798	0	-6.503030300140381
1611072984.2047935	50	-5.4282050132751465
1611074111.4327204	100	-8.2590913772583
1611075274.631954	150	-6.704545497894287
1611076421.6047485	200	-6.027272701263428
1611077566.3818645	250	-5.828260898590088
1611078723.528155	300	-4.427659511566162
1611079869.186168	350	-4.456521511077881
1611081002.1565518	400	-4.129032135009766
1611082151.460795	450	-4.891891956329346
1611083308.1520362	500	-7.102499961853027
1611084465.017358	550	-5.0622639656066895
1611085627.6222816	600	-6.099999904632568
1611086789.3314955	650	-3.524444341659546
1611087952.3535767	700	-6.157777786254883
1611089095.585601	750	-6.27222204208374
1611090246.2528143	800	-4.215384483337402
1611091382.6257412	850	-4.602173805236816
1611092515.4193316	900	-4.997674465179443
1611093658.6638584	950	-4.094594478607178
1611094791.9314663	1000	-4.120512962341309
1611095935.239275	1050	-4.246153831481934
1611097064.0329196	1100	-5.116279125213623
1611098206.0536706	1150	-4.402272701263428
1611099344.9047976	1200	-5.001960754394531
1611100482.9525807	1250	-4.248717784881592
1611101625.3973224	1300	-4.493750095367432
1611102763.5972247	1350	-5.751163005828857
1611103896.8482451	1400	-4.210810661315918
1611105034.1454656	1450	-5.016129016876221
1611106163.4891348	1500	-4.589361667633057
1611107305.6498413	1550	-4.569767475128174
1611108453.6915033	1600	-4.566666603088379
1611109588.0103014	1650	-4.411110877990723
1611110731.02869	1700	-3.616666555404663
1611111851.4132943	1750	-3.8968749046325684
1611112969.792078	1800	-3.4159090518951416
1611114094.2345276	1850	-5.541463375091553
1611115243.5928867	1900	-4.590909004211426
1611116375.9018748	1950	-5.440625190734863
1611117510.237477	2000	-3.5142858028411865
1611118641.7640324	2050	-5.393181800842285
1611119784.6645772	2100	-4.541379451751709
1611120935.1823037	2150	-3.279487133026123
1611122066.2549424	2200	-3.660975694656372
1611123190.1601646	2250	-4.957499980926514
1611124333.2208855	2300	-3.5068182945251465
1611125461.103173	2350	-6.290625095367432
1611126603.0604506	2400	-3.894594669342041
1611127742.4382098	2450	-2.7571427822113037
1611128882.4236567	2500	-3.045454502105713
1611130030.682415	2550	-3.704545497894287
1611131191.2747061	2600	-4.492499828338623
1611132325.348132	2650	-5.2323527336120605
1611133471.833014	2700	-2.975555658340454
1611134620.4643264	2750	-4.90612268447876
1611135781.872532	2800	-3.8499999046325684
1611136927.1926265	2850	-3.675471782684326
1611138083.783963	2900	-4.390244007110596
1611139229.374495	2950	-5.28125
1611140411.2485664	3000	-3.0840001106262207
1611141553.563432	3050	-4.3685712814331055
1611142714.2374141	3100	-5.093939304351807
1611143855.0560877	3150	-5.197500228881836
1611145009.8117948	3200	-5.256410121917725
1611146151.2010174	3250	-5.411110877990723
1611147289.9549842	3300	-4.969696998596191
1611148439.3410225	3350	-5.393023490905762
1611149588.4440253	3400	-3.9675676822662354
1611150748.1425107	3450	-3.6700000762939453
1611151897.0013123	3500	-3.997560977935791
1611153030.9756444	3550	-4.848718166351318
1611154189.665821	3600	-3.21842098236084
1611155328.9952025	3650	-5.712500095367432
1611156450.3268428	3700	-4.972222328186035
1611157584.7695274	3750	-4.849999904632568
1611158710.1670523	3800	-5.841860294342041
1611159850.6266074	3850	-3.49399995803833
1611160972.7240865	3900	-3.024242401123047
1611162104.026811	3950	-5.027083396911621
1611163234.1574576	4000	-4.523077011108398
1611164371.8657355	4050	-4.405128002166748
1611165503.2414916	4100	-5.263636589050293
1611166649.9493954	4150	-4.109090805053711
1611167780.896702	4200	-3.345238208770752
1611168919.0498214	4250	-2.770270347595215
1611170068.5521708	4300	-5.78000020980835
1611171202.7282825	4350	-4.058536529541016
1611172336.837453	4400	-5.056521892547607
1611173478.981206	4450	-5.212194919586182
1611174621.564869	4500	-4.416278839111328
1611175778.9385138	4550	-4.585000038146973
1611176936.6864483	4600	-8.194999694824219
1611178100.344765	4650	-3.1804347038269043
1611179274.6277108	4700	-3.2780487537384033
1611180451.2628284	4750	-3.4124999046325684
1611181617.075552	4800	-4.49545431137085
1611182780.2244415	4850	-4.386486530303955
1611183934.1416268	4900	-5.094285488128662
1611185070.2119055	4950	-5.308333396911621
1611186095.8574874	5000	-4.9419355392456055
