# Supplementary material
Source: ML conference proceedings conference paper supplement (https://proceedings.mlr.press/v139/rahman21a.html)
Supplement: Supplementary file 3 [file rahman21a-supp.zip › ICMLSupportingDoc 2/Visualization/OpenFortAttackRes/TRAIN/DGN-MARL/run-.-tag-Rewards_adhoc_train7.csv]

Wall time	Step	Value
1611071821.6983001	0	-4.599999904632568
1611072976.761585	50	-4.586111068725586
1611074137.937749	100	-9.504166603088379
1611075302.6920567	150	-5.922222137451172
1611076467.781755	200	-5.069047451019287
1611077626.468655	250	-5.30344820022583
1611078791.1012309	300	-3.909090995788574
1611079957.3983536	350	-7.512820720672607
1611081105.4052923	400	-4.0740742683410645
1611082248.855066	450	-3.297222137451172
1611083394.9982235	500	-7.407894611358643
1611084547.2107706	550	-5.325714111328125
1611085701.3941936	600	-5.78249979019165
1611086842.102199	650	-5.682857036590576
1611087991.1651769	700	-6.709677219390869
1611089136.1466935	750	-6.1028571128845215
1611090264.1732526	800	-3.3942856788635254
1611091412.0887873	850	-4.222727298736572
1611092552.7184153	900	-5.190476417541504
1611093704.9727244	950	-5.327907085418701
1611094847.9042416	1000	-4.374509811401367
1611095983.318621	1050	-5.478125095367432
1611097129.232673	1100	-3.911764621734619
1611098269.2683275	1150	-4.654761791229248
1611099419.043491	1200	-5.278260707855225
1611100559.6058486	1250	-3.851020336151123
1611101703.8119626	1300	-5.886363506317139
1611102845.220083	1350	-4.616326332092285
1611103987.5180974	1400	-4.103389739990234
1611105121.405644	1450	-3.872549057006836
1611106260.6637409	1500	-4.900000095367432
1611107395.4172301	1550	-3.289583444595337
1611108529.2514832	1600	-3.5487804412841797
1611109656.6427696	1650	-4.775757789611816
1611110804.926508	1700	-5.046666622161865
1611111941.307808	1750	-3.891111135482788
1611113085.827153	1800	-2.7249999046325684
1611114233.2296503	1850	-4.506382942199707
1611115372.1187627	1900	-5.015151500701904
1611116518.2641344	1950	-3.465116262435913
1611117644.0823584	2000	-5.902631759643555
1611118787.028616	2050	-4.7022223472595215
1611119928.1611838	2100	-3.816216230392456
1611121066.8531005	2150	-5.094117641448975
1611122226.276902	2200	-3.693333387374878
1611123385.777323	2250	-3.279069662094116
1611124512.1928256	2300	-4.148571491241455
1611125673.4655097	2350	-4.193333148956299
1611126814.609237	2400	-3.384782552719116
1611127932.448551	2450	-4.342424392700195
1611129068.6381483	2500	-4.38139533996582
1611130204.425519	2550	-3.7545454502105713
1611131354.3987134	2600	-3.9000000953674316
1611132504.6481936	2650	-2.3051280975341797
1611133645.5504813	2700	-5.773333549499512
1611134788.176879	2750	-5.461538314819336
1611135907.515137	2800	-3.189655065536499
1611137056.494887	2850	-6.609090805053711
1611138211.2423825	2900	-5.645454406738281
1611139369.7776525	2950	-3.9571428298950195
1611140542.8562853	3000	-5.328571319580078
1611141718.9788966	3050	-5.39722204208374
1611142887.3339844	3100	-5.020454406738281
1611144053.422536	3150	-5.562162399291992
1611145211.7021565	3200	-4.800000190734863
1611146359.4047434	3250	-4.482978820800781
1611147501.1723864	3300	-6.160526275634766
1611148642.8360772	3350	-4.502941131591797
1611149794.4343753	3400	-3.774418592453003
1611150935.687412	3450	-4.456250190734863
1611152082.4216619	3500	-4.41034460067749
1611153225.3898377	3550	-6.934999942779541
1611154369.0559366	3600	-1.6166666746139526
1611155500.1516352	3650	-4.478125095367432
1611156643.5250928	3700	-4.253333568572998
1611157800.3971155	3750	-3.6770832538604736
1611158952.586829	3800	-5.666666507720947
1611160099.5168664	3850	-6.636000156402588
1611161263.485991	3900	-4.183333396911621
1611162418.2575426	3950	-3.6914894580841064
1611163573.2778945	4000	-3.647272825241089
1611164729.6171331	4050	-5.026829242706299
1611165890.6394322	4100	-1.4283019304275513
1611167044.5334787	4150	-4.208889007568359
1611168199.77614	4200	-4.729411602020264
1611169360.4882793	4250	-3.528571367263794
1611170510.6651103	4300	-3.7147059440612793
1611171680.6190736	4350	-3.6741936206817627
1611172858.2612057	4400	-5.932432651519775
1611174020.013502	4450	-2.679166555404663
1611175177.9826047	4500	-6.892307758331299
1611176319.2757611	4550	-4.241666793823242
1611177456.9230363	4600	-3.9413044452667236
1611178611.800039	4650	-4.597297191619873
1611179756.982551	4700	-3.6684210300445557
1611180897.06442	4750	-6.458333492279053
1611182040.3096826	4800	-3.870270252227783
1611183188.5012884	4850	-3.5897436141967773
1611184345.4668818	4900	-3.7300000190734863
1611185508.501858	4950	-6.14642858505249
1611186272.7815678	5000	-4.699999809265137
