# Supplementary material
Source: ML conference proceedings conference paper supplement (https://proceedings.mlr.press/v139/rahman21a.html)
Supplement: Supplementary file 3 [file rahman21a-supp.zip › ICMLSupportingDoc 2/Visualization/OpenFortAttackRes/TRAIN/DGN-MARL/run-.-tag-Rewards_adhoc_train8.csv]

Wall time	Step	Value
1611071833.6947436	0	-6.538095474243164
1611073000.954608	50	-4.090000152587891
1611074147.190477	100	-3.562857151031494
1611075304.5840545	150	-6.832499980926514
1611076432.885378	200	-1.807692289352417
1611077581.6168468	250	-5.672340393066406
1611078719.0356338	300	-6.025926113128662
1611079860.0704741	350	-5.862162113189697
1611080995.354507	400	-5.518750190734863
1611082125.9620144	450	-6.703225612640381
1611083261.7254548	500	-2.8592593669891357
1611084406.805391	550	-5.125532150268555
1611085553.8648343	600	-6.985714435577393
1611086681.2523365	650	-3.4838709831237793
1611087819.393811	700	-4.702381134033203
1611088976.5835433	750	-2.293750047683716
1611090123.029297	800	-4.234615325927734
1611091273.119549	850	-5.97857141494751
1611092414.9182832	900	-3.5441861152648926
1611093566.3162637	950	-4.698148250579834
1611094707.586881	1000	-5.650000095367432
1611095846.857779	1050	-3.589583396911621
1611096994.512852	1100	-2.493478298187256
1611098134.6747417	1150	-2.338095188140869
1611099274.2102046	1200	-1.3888888359069824
1611100423.6550379	1250	-2.1422221660614014
1611101555.807449	1300	-1.9918367862701416
1611102690.180021	1350	-1.2339999675750732
1611103841.0476305	1400	-2.3155555725097656
1611105002.7414806	1450	-3.0361111164093018
1611106137.0526154	1500	-4.074418544769287
1611107289.3392737	1550	-3.790476083755493
1611108427.5372438	1600	-2.4749999046325684
1611109574.9763832	1650	-4.215789318084717
1611110715.863165	1700	-2.832758665084839
1611111860.8118584	1750	-2.202127695083618
1611112991.5647817	1800	-4.3378376960754395
1611114114.6027231	1850	-4.094871997833252
1611115259.4715507	1900	-1.3708332777023315
1611116401.31039	1950	-2.3541667461395264
1611117552.161611	2000	-4.371428489685059
1611118681.0610921	2050	-4.596551895141602
1611119830.3117845	2100	-1.0645833015441895
1611120989.9305606	2150	-1.393617033958435
1611122152.5519419	2200	-4.221951007843018
1611123320.779334	2250	-3.5250000953674316
1611124471.0678005	2300	-2.9342105388641357
1611125633.2904632	2350	-2.2562499046325684
1611126802.747617	2400	-1.9359999895095825
1611127941.6531186	2450	-3.493333339691162
1611129081.3796587	2500	-2.152777671813965
1611130226.101484	2550	-5.4911112785339355
1611131368.9855423	2600	-4.530555725097656
1611132505.916603	2650	-3.905714273452759
1611133652.0569038	2700	-4.354545593261719
1611134791.9681463	2750	-4.384090900421143
1611135940.892628	2800	-1.286956548690796
1611137072.3142827	2850	-4.239534854888916
1611138212.6109545	2900	-3.296875
1611139363.1713352	2950	-4.102040767669678
1611140490.8589163	3000	-2.2851850986480713
1611141644.7418942	3050	-2.8963637351989746
1611142805.1965823	3100	-3.659090995788574
1611143965.4664626	3150	-5.096875190734863
1611145109.5181918	3200	-5.441666603088379
1611146269.761149	3250	-4.485365867614746
1611147409.2515159	3300	-3.506666660308838
1611148546.3465672	3350	-2.7333333492279053
1611149696.1809685	3400	-2.7386362552642822
1611150824.8671002	3450	-1.600000023841858
1611151955.3304753	3500	-5.130302906036377
1611153083.9876943	3550	-1.5479166507720947
1611154235.3383405	3600	-3.111999988555908
1611155363.7675772	3650	-1.818750023841858
1611156500.7468116	3700	-2.911764621734619
1611157630.5971234	3750	-4.644680976867676
1611158771.9676495	3800	-4.300000190734863
1611159907.8253667	3850	-2.200000047683716
1611161033.8153172	3900	-2.855555534362793
1611162170.9895623	3950	-2.616981029510498
1611163328.4660633	4000	-4.985294342041016
1611164494.3951137	4050	-4.057142734527588
1611165660.4263763	4100	-4.637837886810303
1611166814.2821093	4150	-3.694444417953491
1611167961.2426097	4200	-3.5920000076293945
1611169104.2545996	4250	-2.712820529937744
1611170243.3009706	4300	-4.480952262878418
1611171380.8398027	4350	-2.0256409645080566
1611172511.5516288	4400	-2.402777671813965
1611173654.1717503	4450	-1.1326531171798706
1611174780.6308913	4500	-4.270270347595215
1611175904.0040925	4550	-3.625
1611177070.525109	4600	-3.432499885559082
1611178210.0495005	4650	-2.8483870029449463
1611179366.6016495	4700	-4.655769348144531
1611180505.3713937	4750	-3.6468749046325684
1611181644.897548	4800	-4.233333110809326
1611182791.3895922	4850	-4.7828569412231445
1611183940.3951156	4900	-2.7959184646606445
1611185075.6595793	4950	-1.9500000476837158
1611186087.2653189	5000	-2.559999942779541
