# Supplementary material
Source: ML conference proceedings conference paper supplement (https://proceedings.mlr.press/v139/rahman21a.html)
Supplement: Supplementary file 3 [file rahman21a-supp.zip › ICMLSupportingDoc 2/Visualization/OpenFortAttackRes/TRAIN/DGN-MARL_Test/run-.-tag-Rewards_adhoc_test.csv]

Wall time	Step	Value
1611071748.527878	0	-6.548571586608887
1611072888.5664809	50	-3.3518519401550293
1611074038.4269547	100	-6.596078395843506
1611075185.647895	150	-3.240476131439209
1611076338.0717976	200	-5.882352828979492
1611077488.0296602	250	-2.8942856788635254
1611078643.3148358	300	-5.5545454025268555
1611079781.0111728	350	-4.9422221183776855
1611080918.656514	400	-7.599999904632568
1611082043.8162856	450	-5.3807692527771
1611083188.0450263	500	-7.0545454025268555
1611084330.0004997	550	-4.607692241668701
1611085476.9433947	600	-8.479999542236328
1611086635.0310955	650	-5.621738910675049
1611087770.1186788	700	-7.1078948974609375
1611088907.348883	750	-4.875555515289307
1611090050.60188	800	-5.163414478302002
1611091180.5808778	850	-4.809999942779541
1611092319.5679505	900	-5.090909004211426
1611093457.4371839	950	-5.717948913574219
1611094593.517555	1000	-5.212820529937744
1611095730.8006127	1050	-6.070833206176758
1611096863.9960132	1100	-5.365909099578857
1611098007.8384125	1150	-5.004444599151611
1611099149.9860349	1200	-3.4857141971588135
1611100285.5405514	1250	-4.271111011505127
1611101429.602287	1300	-7.723809719085693
1611102573.0004826	1350	-4.614634037017822
1611103708.7545154	1400	-5.379411697387695
1611104846.0335748	1450	-3.971874952316284
1611105980.5358899	1500	-4.673684120178223
1611107131.2026138	1550	-2.6500000953674316
1611108270.6805418	1600	-2.9146342277526855
1611109396.2830577	1650	-3.5837838649749756
1611110526.2611165	1700	-3.5630435943603516
1611111674.6404142	1750	-4.777272701263428
1611112792.1019344	1800	-7.5217390060424805
1611113922.7101953	1850	-4.532352924346924
1611115066.6533158	1900	-3.3102564811706543
1611116196.255107	1950	-4.893023490905762
1611117327.4712038	2000	-6.981818199157715
1611118485.5440097	2050	-2.5250000953674316
1611119634.1973152	2100	-5.561999797821045
1611120780.934763	2150	-5.502173900604248
1611121903.4188583	2200	-5.663157939910889
1611123019.4512427	2250	-8.555999755859375
1611124166.614092	2300	-2.7699999809265137
1611125305.2371492	2350	-5.484782695770264
1611126443.4025471	2400	-5.061290264129639
1611127591.1599286	2450	-5.644999980926514
1611128732.212158	2500	-5.775000095367432
1611129867.0247343	2550	-5.647368431091309
1611131017.2969446	2600	-4.6847825050354
1611132167.056695	2650	-3.8930232524871826
1611133296.3593276	2700	-3.7833333015441895
1611134448.539502	2750	-3.32745099067688
1611135597.2840426	2800	-4.452777862548828
1611136715.100543	2850	-8.875
1611137872.0219817	2900	-3.952777862548828
1611139005.385174	2950	-5.992307662963867
1611140160.5473225	3000	-5.165853500366211
1611141323.0619848	3050	-5.608823299407959
1611142489.6075802	3100	-4.882978916168213
1611143640.4086454	3150	-3.151219606399536
1611144768.2671375	3200	-5.733333110809326
1611145906.7659616	3250	-6.815625190734863
1611147066.5807807	3300	-6.367499828338623
1611148211.2433689	3350	-7.070588111877441
1611149361.1973646	3400	-4.670212745666504
1611150507.4289012	3450	-7.048888683319092
1611151651.8352969	3500	-5.008333206176758
1611152793.821999	3550	-6.0676469802856445
1611153941.6039443	3600	-6.777777671813965
1611155089.9036374	3650	-5.650000095367432
1611156236.3322225	3700	-4.362790584564209
1611157368.1122425	3750	-4.509090900421143
1611158490.325874	3800	-8.952631950378418
1611159619.9117563	3850	-5.051515102386475
1611160762.4967542	3900	-5.65500020980835
1611161904.8452935	3950	-5.13095235824585
1611163045.868624	4000	-4.929629802703857
1611164199.3656266	4050	-3.5333333015441895
1611165333.2226448	4100	-4.752272605895996
1611166460.819482	4150	-3.8550000190734863
1611167587.5120623	4200	-4.544444561004639
1611168725.0524285	4250	-7.433333396911621
1611169877.4728742	4300	-3.851428508758545
1611171023.8505006	4350	-8.020000457763672
1611172170.2425148	4400	-4.727907180786133
1611173306.8869147	4450	-4.0577778816223145
1611174444.4666443	4500	-8.062962532043457
1611175598.1371012	4550	-3.758333444595337
1611176720.919333	4600	-2.539393901824951
1611177857.9659078	4650	-2.119999885559082
1611178990.1614861	4700	-6.181818008422852
1611180126.107024	4750	-2.3628571033477783
1611181254.6225054	4800	-4.11904764175415
1611182369.7615347	4850	-3.25
1611183491.7263877	4900	-3.7750000953674316
1611184622.5650394	4950	-6.144827365875244
1611185754.6118803	5000	-3.458139419555664
