# Supplementary material
Source: ML conference proceedings conference paper supplement (https://proceedings.mlr.press/v139/rahman21a.html)
Supplement: Supplementary file 3 [file rahman21a-supp.zip › ICMLSupportingDoc 2/Visualization/OpenFortAttackRes/TRAIN/DGN-MARL_Test/run-.-tag-Rewards_adhoc_test2.csv]

Wall time	Step	Value
1611071764.972331	0	-7.018518447875977
1611072907.0915878	50	-4.716000080108643
1611074069.68603	100	-5.94444465637207
1611075221.4045458	150	-6.613513469696045
1611076373.4599345	200	-4.685294151306152
1611077514.0720067	250	-8.380768775939941
1611078674.4787536	300	-6.072972774505615
1611079836.4806933	350	-5.119999885559082
1611080989.2837102	400	-5.62666654586792
1611082126.6077101	450	-2.9000000953674316
1611083276.4563334	500	-5.9571428298950195
1611084411.8605766	550	-4.7703704833984375
1611085561.149436	600	-5.378125190734863
1611086702.2491474	650	-8.315999984741211
1611087826.2802844	700	-6.636111259460449
1611088962.3147154	750	-6.67435884475708
1611090104.589542	800	-8.055000305175781
1611091246.110437	850	-6.42380952835083
1611092384.9077296	900	-6.604877948760986
1611093516.8054302	950	-6.3606061935424805
1611094654.8640115	1000	-7.096875190734863
1611095791.5769827	1050	-6.408823490142822
1611096932.5750277	1100	-3.049999952316284
1611098077.5677557	1150	-6.838461399078369
1611099220.9599802	1200	-5.417778015136719
1611100361.314465	1250	-6.0821428298950195
1611101488.0103838	1300	-7.599999904632568
1611102643.2615983	1350	-4.7282609939575195
1611103774.6560493	1400	-5.407894611358643
1611104912.82205	1450	-6.4146342277526855
1611106045.4656656	1500	-6.540909290313721
1611107174.2423377	1550	-6.056250095367432
1611108310.9166067	1600	-6.047618865966797
1611109436.449538	1650	-6.148717880249023
1611110568.0992503	1700	-3.4679999351501465
1611111708.2219436	1750	-6.605405330657959
1611112831.8860755	1800	-4.435999870300293
1611113969.606936	1850	-8.045000076293945
1611115103.4542825	1900	-2.693103551864624
1611116235.855453	1950	-3.997058868408203
1611117373.645227	2000	-4.791110992431641
1611118515.3093166	2050	-5.2906975746154785
1611119646.824154	2100	-5.322580814361572
1611120793.0287688	2150	-4.597959041595459
1611121936.621256	2200	-3.7428572177886963
1611123072.9249895	2250	-4.081999778747559
1611124217.1828918	2300	-5.509302139282227
1611125347.6039557	2350	-5.304999828338623
1611126484.4778247	2400	-5.721428394317627
1611127631.242817	2450	-4.510256290435791
1611128777.8623936	2500	-5.292982578277588
1611129914.3057885	2550	-3.8499999046325684
1611131059.765365	2600	-6.574999809265137
1611132210.3750088	2650	-5.046938896179199
1611133359.6006804	2700	-6.2617645263671875
1611134489.7996376	2750	-4.0423078536987305
1611135618.126999	2800	-4.5625
1611136778.731386	2850	-5.742307662963867
1611137932.096254	2900	-3.073469400405884
1611139081.0897925	2950	-3.8732142448425293
1611140211.8573382	3000	-5.7093024253845215
1611141351.6693618	3050	-4.394999980926514
1611142506.5685842	3100	-2.9939393997192383
1611143657.479727	3150	-3.1796295642852783
1611144794.4305656	3200	-4.25
1611145936.726041	3250	-5.845161437988281
1611147060.3546004	3300	-5.34375
1611148201.6978796	3350	-3.658620595932007
1611149349.411407	3400	-4.3689656257629395
1611150504.9168425	3450	-2.924489736557007
1611151666.2588167	3500	-6.45405387878418
1611152802.902677	3550	-5.93684196472168
1611153949.8135111	3600	-5.43055534362793
1611155108.7540803	3650	-5.34782600402832
1611156272.645452	3700	-0.42692306637763977
1611157437.1459038	3750	-1.09333336353302
1611158593.2334304	3800	-4.430434703826904
1611159756.10481	3850	-4.733333110809326
1611160911.5189555	3900	-2.0441176891326904
1611162054.9933858	3950	-4.266666889190674
1611163201.226118	4000	-2.7804877758026123
1611164355.0417845	4050	-0.15217390656471252
1611165504.7181144	4100	-6.306250095367432
1611166672.651894	4150	-3.3191490173339844
1611167839.4205103	4200	-6.789473533630371
1611168989.9526403	4250	-1.6270270347595215
1611170157.4955227	4300	-2.968965530395508
1611171331.8505657	4350	-5.170731544494629
1611172506.3283541	4400	-5.504651069641113
1611173665.2533085	4450	-2.4043478965759277
1611174824.856235	4500	-3.824324369430542
1611176003.3297124	4550	-3.3959999084472656
1611177166.0089705	4600	-6.941176414489746
1611178347.7079291	4650	-2.8551723957061768
1611179507.4170768	4700	-4.495999813079834
1611180670.6283302	4750	-6.626923084259033
1611181839.3158805	4800	-3.700000047683716
1611183009.7223296	4850	-5.526086807250977
1611184193.2795904	4900	-4.887179374694824
1611185353.476893	4950	-5.353658676147461
1611186231.1479156	5000	-4.87045431137085
