# Supplementary material
Source: ML conference proceedings conference paper supplement (https://proceedings.mlr.press/v139/rahman21a.html)
Supplement: Supplementary file 3 [file rahman21a-supp.zip › ICMLSupportingDoc 2/Visualization/OpenFortAttackRes/TRAIN/DGN-MARL_Test/run-.-tag-Rewards_adhoc_test3.csv]

Wall time	Step	Value
1611071773.2732496	0	-7.7419352531433105
1611072926.1856847	50	-6.861111164093018
1611074070.15914	100	-5.192857265472412
1611075222.5206113	150	-5.068749904632568
1611076366.83854	200	-7.032258033752441
1611077524.200632	250	-4.285294055938721
1611078670.2219403	300	-4.640540599822998
1611079811.2455916	350	-5.41304349899292
1611080961.8227022	400	-5.474999904632568
1611082122.4848504	450	-5.82444429397583
1611083276.889045	500	-6.480391979217529
1611084415.641357	550	-4.5333333015441895
1611085562.2305093	600	-5.6258063316345215
1611086703.811158	650	-5.490624904632568
1611087865.8226438	700	-7.502040863037109
1611089030.6030517	750	-4.488095283508301
1611090181.6236858	800	-5.354762077331543
1611091338.9582937	850	-5.110000133514404
1611092475.7264955	900	-6.458139419555664
1611093621.260233	950	-7.067500114440918
1611094770.9227822	1000	-5.758695602416992
1611095918.0515676	1050	-5.218604564666748
1611097053.7992506	1100	-4.18372106552124
1611098200.8252969	1150	-3.4675676822662354
1611099340.6654866	1200	-6.9178571701049805
1611100468.300131	1250	-4.145946025848389
1611101616.0946128	1300	-4.409999847412109
1611102759.9350433	1350	-4.935135364532471
1611103899.0855896	1400	-7.6875
1611105042.4860046	1450	-7.251428604125977
1611106190.7169514	1500	-9.089285850524902
1611107340.163687	1550	-8.245454788208008
1611108488.341716	1600	-6.599999904632568
1611109636.292002	1650	-5.9314284324646
1611110780.6637604	1700	-3.881481409072876
1611111898.2153478	1750	-6.953571319580078
1611113025.6941807	1800	-5.978787899017334
1611114171.1653738	1850	-3.804081678390503
1611115321.2381952	1900	-3.575000047683716
1611116456.776247	1950	-7.9041666984558105
1611117595.4634974	2000	-6.080952167510986
1611118728.6824512	2050	-4.724444389343262
1611119872.1677206	2100	-5.52400016784668
1611121013.774696	2150	-5.729032039642334
1611122150.7021163	2200	-5.1258063316345215
1611123297.7214527	2250	-6.404651165008545
1611124441.3284545	2300	-6.417646884918213
1611125602.5721953	2350	-5.670454502105713
1611126751.9545858	2400	-3.7281250953674316
1611127892.2952766	2450	-6.616666793823242
1611129038.3419955	2500	-4.103846073150635
1611130174.9239802	2550	-8.863158226013184
1611131312.1586585	2600	-6.4079999923706055
1611132442.2788277	2650	-2.9846153259277344
1611133597.75693	2700	-2.946666717529297
1611134729.135798	2750	-3.992682933807373
1611135861.5870771	2800	-5.380000114440918
1611136986.3611548	2850	-2.813793182373047
1611138130.1733608	2900	-3.2857143878936768
1611139272.5800335	2950	-4.474999904632568
1611140424.918865	3000	-5.61063814163208
1611141549.3161871	3050	-6.558823585510254
1611142689.4100924	3100	-7.841379165649414
1611143842.297412	3150	-4.347727298736572
1611144979.5257103	3200	-4.614285945892334
1611146116.5898001	3250	-4.226666450500488
1611147268.367159	3300	-5.306976795196533
1611148413.42644	3350	-2.697561025619507
1611149574.9685009	3400	-2.7923076152801514
1611150718.4984202	3450	-5.738636493682861
1611151842.9124227	3500	-2.588371992111206
1611152990.2939801	3550	-3.048717975616455
1611154113.7928095	3600	-3.54693865776062
1611155226.1271765	3650	-4.138235092163086
1611156362.2533054	3700	-5.028571605682373
1611157497.1336348	3750	-3.0658535957336426
1611158632.2503207	3800	-2.034146308898926
1611159765.4321628	3850	-5.6674418449401855
1611160877.9950013	3900	-2.914285659790039
1611162005.9706683	3950	-3.9220337867736816
1611163138.3420959	4000	-3.7249999046325684
1611164276.3041806	4050	-3.4000000953674316
1611165399.5715709	4100	-4.618750095367432
1611166517.414858	4150	-4.699999809265137
1611167654.9945412	4200	-5.862222194671631
1611168796.7404852	4250	-4.938709735870361
1611169922.959162	4300	-2.845161199569702
1611171043.9797192	4350	-5.65217399597168
1611172159.265678	4400	-6.709090709686279
1611173273.7831433	4450	-5.362069129943848
1611174392.6694703	4500	-5.661290168762207
1611175514.9287548	4550	-3.3499999046325684
1611176646.1955893	4600	-5.116128921508789
1611177771.8942952	4650	-3.778125047683716
1611178898.0153685	4700	-1.850000023841858
1611180032.2092695	4750	-5.064444541931152
1611181170.837566	4800	-1.540740728378296
1611182295.9227493	4850	-8.623529434204102
1611183421.288026	4900	-5.3692307472229
1611184549.0059721	4950	-4.150000095367432
1611185679.3288262	5000	-4.251428604125977
