# Supplementary material
Source: ML conference proceedings conference paper supplement (https://proceedings.mlr.press/v139/rahman21a.html)
Supplement: Supplementary file 3 [file rahman21a-supp.zip › ICMLSupportingDoc 2/Visualization/OpenFortAttackRes/TRAIN/DGN-MARL_Test/run-.-tag-Rewards_adhoc_test4.csv]

Wall time	Step	Value
1611071795.0813687	0	-6.538461685180664
1611072974.1742284	50	-7.056756973266602
1611074134.5193894	100	-4.536538600921631
1611075298.507925	150	-6.062745094299316
1611076472.3020947	200	-5.961702346801758
1611077634.8751206	250	-4.002439022064209
1611078775.838702	300	-4.75
1611079929.7368796	350	-6.002380847930908
1611081087.8276129	400	-6.066666603088379
1611082229.5308566	450	-7.882352828979492
1611083361.3574667	500	-6.585714340209961
1611084504.0741117	550	-5.315789699554443
1611085667.997616	600	-5.502325534820557
1611086825.496503	650	-6.015151500701904
1611087981.6482608	700	-3.3469388484954834
1611089124.7292516	750	-5.471052646636963
1611090267.9439485	800	-5.848780632019043
1611091415.673767	850	-6.138095378875732
1611092565.1075447	900	-5.71875
1611093712.1935208	950	-6.028571605682373
1611094842.4576912	1000	-4.0676469802856445
1611095976.3537292	1050	-8.173529624938965
1611097108.169634	1100	-6.363157749176025
1611098247.6619155	1150	-5.783871173858643
1611099386.2540007	1200	-7.0821428298950195
1611100513.2896194	1250	-6.114814758300781
1611101652.2780406	1300	-6.336585521697998
1611102797.196209	1350	-4.659999847412109
1611103945.5879698	1400	-6.747222423553467
1611105088.2897625	1450	-6.573529243469238
1611106233.6370077	1500	-5.3606061935424805
1611107365.0545728	1550	-5.65925931930542
1611108498.6719794	1600	-4.599999904632568
1611109641.1036603	1650	-4.869565010070801
1611110763.5605476	1700	-6.822580814361572
1611111903.2564318	1750	-5.661904811859131
1611113030.409319	1800	-7.188889026641846
1611114150.438389	1850	-4.243902206420898
1611115264.5709627	1900	-2.4000000953674316
1611116405.207901	1950	-6.070967674255371
1611117557.8041663	2000	-2.9361701011657715
1611118703.2108262	2050	-3.5020833015441895
1611119836.8944714	2100	-3.085714340209961
1611120955.3045337	2150	-6.168571472167969
1611122077.1180482	2200	-5.912903308868408
1611123206.0433273	2250	-3.564516067504883
1611124345.8464398	2300	-4.5291666984558105
1611125475.7740214	2350	-4.039999961853027
1611126610.2366521	2400	-6.766666889190674
1611127736.3988361	2450	-5.71999979019165
1611128876.902884	2500	-4.8125
1611130007.5803728	2550	-8.670968055725098
1611131152.5079246	2600	-3.5199999809265137
1611132318.0985112	2650	-4.287805080413818
1611133452.7645953	2700	-3.22352933883667
1611134622.4093113	2750	-5.175510406494141
1611135765.6538315	2800	-2.303999900817871
1611136908.2725573	2850	-3.6343750953674316
1611138057.594944	2900	-3.2551021575927734
1611139182.1375477	2950	-4.261538505554199
1611140310.065565	3000	-4.83863639831543
1611141445.3031712	3050	-3.418181896209717
1611142587.7057168	3100	-1.2235294580459595
1611143740.605952	3150	-3.769387722015381
1611144888.3053486	3200	-5.538095474243164
1611146036.2596107	3250	-2.359999895095825
1611147189.5528638	3300	-4.088461399078369
1611148337.0048993	3350	-4.284615516662598
1611149465.4736817	3400	-3.909302234649658
1611150607.7157466	3450	-3.25
1611151736.5426064	3500	-3.140000104904175
1611152885.901605	3550	-4.777777671813965
1611154041.0391116	3600	-5.739999771118164
1611155210.5776093	3650	-3.6241378784179688
1611156380.385421	3700	-5.003030300140381
1611157530.73671	3750	-5.112121105194092
1611158702.320581	3800	-2.274074077606201
1611159858.4886675	3850	-3.204347848892212
1611161032.8179717	3900	-3.9692306518554688
1611162178.8094938	3950	-2.8499999046325684
1611163317.0947328	4000	-5.436666488647461
1611164484.6077332	4050	-1.3025000095367432
1611165638.3713748	4100	-6.4041666984558105
1611166771.2475154	4150	-5.992307662963867
1611167930.2900696	4200	-4.8807692527771
1611169068.7513616	4250	-5.517391204833984
1611170207.0731118	4300	-6.48799991607666
1611171348.8805048	4350	-2.5173912048339844
1611172493.201024	4400	-3.4478261470794678
1611173645.8731503	4450	-1.5105262994766235
1611174798.0573678	4500	-3.7172412872314453
1611175940.5663466	4550	-6.974999904632568
1611177094.0636792	4600	-2.9288887977600098
1611178233.8542163	4650	-4.069230556488037
1611179395.5660114	4700	-3.4375
1611180551.6748056	4750	-3.182926893234253
1611181685.8874388	4800	-5.757894515991211
1611182836.90646	4850	-1.874074101448059
1611184006.5517972	4900	-2.917142868041992
1611185162.262697	4950	-3.4279069900512695
1611186145.250474	5000	-3.4124999046325684
