# Supplementary material
Source: ML conference proceedings conference paper supplement (https://proceedings.mlr.press/v139/rahman21a.html)
Supplement: Supplementary file 3 [file rahman21a-supp.zip › ICMLSupportingDoc 2/Visualization/OpenFortAttackRes/TRAIN/DGN-MARL_Test/run-.-tag-Rewards_adhoc_test5.csv]

Wall time	Step	Value
1611071803.0180378	0	-8.321052551269531
1611072950.7065432	50	-5.5
1611074097.7432263	100	-6.481578826904297
1611075254.8073838	150	-4.527272701263428
1611076420.5962749	200	-5.0730767250061035
1611077570.681495	250	-9.482142448425293
1611078723.2171094	300	-4.650000095367432
1611079882.5809076	350	-6.848718166351318
1611081023.3143764	400	-4.492592811584473
1611082164.6316755	450	-5.0
1611083312.4247215	500	-5.105405330657959
1611084473.0090685	550	-5.159090995788574
1611085622.589783	600	-4.951282024383545
1611086768.3829029	650	-3.0480000972747803
1611087919.9189305	700	-3.651724100112915
1611089072.2557461	750	-5.9384613037109375
1611090213.1167948	800	-5.697368621826172
1611091362.513309	850	-2.803999900817871
1611092525.061413	900	-6.441860675811768
1611093659.7937047	950	-4.7317070960998535
1611094805.8929794	1000	-7.253333568572998
1611095965.132256	1050	-5.828125
1611097109.7376604	1100	-6.96999979019165
1611098244.2919593	1150	-7.334615230560303
1611099393.2520683	1200	-3.556410312652588
1611100525.4717226	1250	-3.615999937057495
1611101666.339359	1300	0.2720000147819519
1611102802.9468791	1350	-5.744827747344971
1611103938.6465142	1400	-9.484999656677246
1611105080.1997104	1450	-6.099999904632568
1611106218.1786501	1500	-4.674074172973633
1611107356.1143525	1550	-4.709677219390869
1611108484.8843026	1600	-6.679166793823242
1611109624.7360585	1650	-7.780769348144531
1611110766.460195	1700	-6.574999809265137
1611111896.2337713	1750	-4.9041666984558105
1611113047.2308135	1800	-4.900000095367432
1611114191.138188	1850	-6.514814853668213
1611115321.3068347	1900	-5.263333320617676
1611116457.0053258	1950	-6.993103504180908
1611117584.628683	2000	-6.974999904632568
1611118738.710788	2050	-5.080851078033447
1611119872.1281598	2100	-7.690625190734863
1611121005.103939	2150	-4.246874809265137
1611122155.4669237	2200	-2.517777681350708
1611123320.4482508	2250	-3.554054021835327
1611124472.7731779	2300	-4.050000190734863
1611125629.6330776	2350	-6.183333396911621
1611126775.6116097	2400	-4.791892051696777
1611127917.7043643	2450	-4.521052837371826
1611129062.2068224	2500	-2.9952380657196045
1611130216.5821772	2550	-2.316279172897339
1611131353.540026	2600	-3.621875047683716
1611132496.571691	2650	-5.528260707855225
1611133642.4109032	2700	-5.624242305755615
1611134784.915864	2750	-4.597916603088379
1611135916.000004	2800	-3.289189100265503
1611137070.370892	2850	-3.25
1611138207.847981	2900	-3.518420934677124
1611139351.2720282	2950	-4.248780250549316
1611140492.8770978	3000	-4.429999828338623
1611141639.875544	3050	-3.0409090518951416
1611142772.3743393	3100	-1.7162790298461914
1611143929.4911287	3150	-7.8176469802856445
1611145068.0916426	3200	-2.6083333492279053
1611146206.2575364	3250	-5.0527777671813965
1611147358.3975031	3300	-4.091891765594482
1611148494.7520936	3350	-9.03157901763916
1611149638.4972901	3400	-1.525925874710083
1611150771.7600856	3450	-4.019354820251465
1611151915.9081519	3500	-2.944117546081543
1611153056.601592	3550	-3.4029412269592285
1611154182.0809293	3600	-1.3875000476837158
1611155330.0825734	3650	-4.5216217041015625
1611156478.6401482	3700	-2.6656250953674316
1611157624.8268306	3750	-3.9846153259277344
1611158763.6588871	3800	-3.0352940559387207
1611159899.3844547	3850	-8.121428489685059
1611161046.138743	3900	-2.047619104385376
1611162194.491758	3950	-7.144999980926514
1611163333.0196831	4000	-1.7677419185638428
1611164501.2118046	4050	-5.565908908843994
1611165658.6274178	4100	-4.095238208770752
1611166813.4067972	4150	-2.6297872066497803
1611167966.4708989	4200	-3.6512820720672607
1611169110.466939	4250	-3.1844444274902344
1611170262.2344005	4300	-3.866666555404663
1611171410.6513445	4350	-4.176086902618408
1611172549.4953446	4400	-2.5926828384399414
1611173700.9326377	4450	-3.0763158798217773
1611174859.538489	4500	-2.3924999237060547
1611176012.766533	4550	-5.172973155975342
1611177161.5951805	4600	-2.418604612350464
1611178309.2789786	4650	-2.6533334255218506
1611179451.1908221	4700	-7.168181896209717
1611180586.5009415	4750	-4.264999866485596
1611181722.0405807	4800	-3.3155555725097656
1611182848.8163965	4850	-3.955263137817383
1611183957.7300901	4900	-8.024999618530273
1611185083.3079395	4950	-2.8428571224212646
1611186101.4339375	5000	-6.076315879821777
