# Supplementary material
Source: ML conference proceedings conference paper supplement (https://proceedings.mlr.press/v139/rahman21a.html)
Supplement: Supplementary file 3 [file rahman21a-supp.zip › ICMLSupportingDoc 2/Visualization/OpenFortAttackRes/TRAIN/DGN-MARL_Test/run-.-tag-Rewards_adhoc_test6.csv]

Wall time	Step	Value
1611071824.4119864	0	-6.111538410186768
1611072998.6654065	50	-4.71999979019165
1611074132.6286974	100	-4.1160712242126465
1611075293.3963816	150	-5.6891303062438965
1611076432.5713608	200	-4.525000095367432
1611077581.9521554	250	-3.1414635181427
1611078734.6964338	300	-5.96129035949707
1611079881.0277438	350	-7.30344820022583
1611081013.150302	400	-6.242856979370117
1611082161.5959373	450	-7.282608509063721
1611083318.8120387	500	-5.741379261016846
1611084481.2662115	550	-5.75
1611085637.2926364	600	-5.108333110809326
1611086804.7420468	650	-5.935135364532471
1611087965.671036	700	-5.5714287757873535
1611089113.0512297	750	-6.9347825050354
1611090259.321443	800	-6.073333263397217
1611091393.5152264	850	-4.503571510314941
1611092529.4480972	900	-4.962857246398926
1611093668.9481204	950	-8.133333206176758
1611094809.4200432	1000	-4.148717880249023
1611095947.4153323	1050	-8.49666690826416
1611097076.1936603	1100	-6.849999904632568
1611098217.0388713	1150	-7.507143020629883
1611099358.6805875	1200	-7.45945930480957
1611100500.1825273	1250	-6.8543477058410645
1611101637.9674265	1300	-5.908571243286133
1611102775.8773444	1350	-8.203030586242676
1611103909.9591184	1400	-9.259374618530273
1611105047.0027153	1450	-5.679411888122559
1611106173.919936	1500	-3.67391300201416
1611107323.7768712	1550	-6.214633941650391
1611108469.1193626	1600	-5.703030109405518
1611109601.8477194	1650	-6.877142906188965
1611110744.7899296	1700	-6.927272796630859
1611111861.9903429	1750	-6.1875
1611112982.5800118	1800	-4.611764907836914
1611114107.7748485	1850	-7.830555438995361
1611115260.8618474	1900	-6.084090709686279
1611116385.4490237	1950	-8.815999984741211
1611117527.7784362	2000	-3.940476179122925
1611118659.9448853	2050	-6.15217399597168
1611119800.462394	2100	-2.874358892440796
1611120958.0949936	2150	-5.323404312133789
1611122081.545234	2200	-7.7531914710998535
1611123201.3220623	2250	-4.470370292663574
1611124345.4629428	2300	-4.0923075675964355
1611125474.03151	2350	-4.217241287231445
1611126615.9266577	2400	-5.330769062042236
1611127753.5579538	2450	-6.474999904632568
1611128896.5367858	2500	-3.828571319580078
1611130044.8048894	2550	-3.887179374694824
1611131210.1674552	2600	-3.8690476417541504
1611132342.542842	2650	-4.983673572540283
1611133487.949625	2700	-3.9800000190734863
1611134633.9347098	2750	-4.6028571128845215
1611135792.3837504	2800	-5.486207008361816
1611136944.5800743	2850	-3.0999999046325684
1611138099.8914747	2900	-7.083333492279053
1611139245.8913012	2950	-5.699999809265137
1611140425.0176384	3000	-3.944117546081543
1611141564.6702034	3050	-6.3125
1611142725.7269044	3100	-7.547999858856201
1611143868.6852424	3150	-5.340624809265137
1611145025.9137943	3200	-4.72777795791626
1611146160.9531124	3250	-6.360000133514404
1611147306.8850698	3300	-6.785416603088379
1611148454.0416658	3350	-3.319354772567749
1611149601.0376186	3400	-3.2444443702697754
1611150760.5676053	3450	-3.2300000190734863
1611151911.8150806	3500	-5.945945739746094
1611153046.988743	3550	-6.09743595123291
1611154207.5233483	3600	-3.9583332538604736
1611155340.3456964	3650	-6.261538505554199
1611156469.9146285	3700	-3.951111078262329
1611157596.6184602	3750	-6.73199987411499
1611158724.2378204	3800	-3.575862169265747
1611159862.6520762	3850	-5.365384578704834
1611160986.5674522	3900	-3.987499952316284
1611162115.2175417	3950	-7.088235378265381
1611163244.016218	4000	-8.3125
1611164381.1162686	4050	-6.218181610107422
1611165520.4425411	4100	-3.511904716491699
1611166661.3901067	4150	-6.611538410186768
1611167791.2775266	4200	-4.25
1611168939.3483384	4250	-3.6894736289978027
1611170083.2434442	4300	-4.902631759643555
1611171218.7978988	4350	-3.777777671813965
1611172345.5166535	4400	-7.800000190734863
1611173492.2900128	4450	-4.362500190734863
1611174636.0315673	4500	-4.470731735229492
1611175791.7494488	4550	-3.427500009536743
1611176947.518034	4600	-4.403124809265137
1611178117.6485672	4650	-2.6956522464752197
1611179286.9513097	4700	-2.28947377204895
1611180466.0972466	4750	-2.2274999618530273
1611181635.5070696	4800	-2.1301887035369873
1611182794.8538857	4850	-2.4146342277526855
1611183945.6349564	4900	-4.067741870880127
1611185083.9584394	4950	-3.680555582046509
1611186105.086018	5000	-2.0463414192199707
