# Supplementary material
Source: ML conference proceedings conference paper supplement (https://proceedings.mlr.press/v139/rahman21a.html)
Supplement: Supplementary file 3 [file rahman21a-supp.zip › ICMLSupportingDoc 2/Visualization/OpenFortAttackRes/TRAIN/DGN-MARL_Test/run-.-tag-Rewards_adhoc_test7.csv]

Wall time	Step	Value
1611071834.4080598	0	-5.648648738861084
1611072987.8447788	50	-6.0615386962890625
1611074153.5231142	100	-6.192857265472412
1611075314.2363145	150	-5.732142925262451
1611076480.5092103	200	-7.050000190734863
1611077639.4276063	250	-6.220512866973877
1611078802.6546066	300	-7.383333206176758
1611079970.6276748	350	-6.144117832183838
1611081114.7844002	400	-4.385185241699219
1611082262.8920405	450	-7.272500038146973
1611083410.5277126	500	-2.8863637447357178
1611084564.727578	550	-5.978000164031982
1611085715.4085672	600	-6.622499942779541
1611086858.363358	650	-7.727907180786133
1611088006.0915582	700	-6.593616962432861
1611089145.5081117	750	-4.035999774932861
1611090278.317346	800	-5.214633941650391
1611091423.18787	850	-6.14642858505249
1611092565.793743	900	-5.75
1611093713.5038543	950	-7.724999904632568
1611094862.2567852	1000	-6.239473819732666
1611095993.3572652	1050	-7.186666488647461
1611097142.0383308	1100	-8.105555534362793
1611098286.88945	1150	-5.746938705444336
1611099429.1521258	1200	-6.266666889190674
1611100569.8225014	1250	-6.967647075653076
1611101714.515095	1300	-7.077777862548828
1611102855.6401222	1350	-6.351851940155029
1611104005.6506057	1400	-5.436734676361084
1611105134.7990685	1450	-7.451724052429199
1611106274.9995866	1500	-5.073809623718262
1611107406.5613647	1550	-6.746666431427002
1611108545.3155262	1600	-4.5
1611109667.383679	1650	-7.064516067504883
1611110816.5222943	1700	-6.223333358764648
1611111952.8291488	1750	-6.610344886779785
1611113096.2628345	1800	-6.185184955596924
1611114244.7681708	1850	-6.760714054107666
1611115382.7346716	1900	-6.40645170211792
1611116526.8685732	1950	-7.5354838371276855
1611117655.1214058	2000	-5.864706039428711
1611118804.2931907	2050	-5.457777976989746
1611119938.781416	2100	-4.096428394317627
1611121076.6704144	2150	-8.592000007629395
1611122238.5692565	2200	-4.281818389892578
1611123395.9278355	2250	-5.344444274902344
1611124532.846484	2300	-4.827083110809326
1611125683.6047215	2350	-4.319230556488037
1611126823.6356456	2400	-7.710526466369629
1611127943.75194	2450	-4.315151691436768
1611129079.6842654	2500	-5.742307662963867
1611130214.1731358	2550	-2.3869564533233643
1611131368.438149	2600	-5.078571319580078
1611132513.360492	2650	-8.074999809265137
1611133655.3205156	2700	-3.51200008392334
1611134799.512204	2750	-6.665384769439697
1611135918.9268405	2800	-4.744444370269775
1611137068.0401316	2850	-6.47777795791626
1611138224.6840174	2900	-3.692105293273926
1611139388.4923856	2950	-2.334782600402832
1611140559.214599	3000	-2.581818103790283
1611141734.1680636	3050	-3.8368420600891113
1611142904.4946601	3100	-2.559523820877075
1611144065.62047	3150	-5.075861930847168
1611145229.217295	3200	-3.7734694480895996
1611146371.3262696	3250	-3.474193572998047
1611147513.9455075	3300	-5.216128826141357
1611148662.1746528	3350	-4.25
1611149805.3491485	3400	-6.161538600921631
1611150948.2334898	3450	-4.838889122009277
1611152095.8313203	3500	-2.520930290222168
1611153239.652356	3550	-3.180000066757202
1611154379.968532	3600	-5.05294132232666
1611155509.3314424	3650	-6.763999938964844
1611156656.1138139	3700	-3.978048801422119
1611157816.525249	3750	-3.793877601623535
1611158966.8904293	3800	-3.5512194633483887
1611160113.523378	3850	-3.8794872760772705
1611161275.016168	3900	-3.260714292526245
1611162432.3820467	3950	-4.331818103790283
1611163588.6409934	4000	-3.630232572555542
1611164743.9182332	4050	-2.5999999046325684
1611165906.7821934	4100	-4.6422224044799805
1611167055.459342	4150	-6.0966668128967285
1611168209.100205	4200	-3.9846153259277344
1611169370.3426125	4250	-2.2538461685180664
1611170521.034965	4300	-5.908571243286133
1611171691.0343926	4350	-5.235483646392822
1611172870.8214614	4400	-6.306250095367432
1611174030.3472195	4450	-6.027272701263428
1611175189.405449	4500	-6.021212100982666
1611176329.602639	4550	-5.209374904632568
1611177467.5867302	4600	-5.416666507720947
1611178623.3335166	4650	-5.937837600708008
1611179767.2884696	4700	-4.440625190734863
1611180906.883556	4750	-2.6307692527770996
1611182054.1742032	4800	-2.8499999046325684
1611183202.1285114	4850	-3.276923179626465
1611184357.5585058	4900	-4.420454502105713
1611185522.1545568	4950	-2.493023157119751
1611186277.9468486	5000	-2.7722222805023193
