# Supplementary material
Source: ML conference proceedings conference paper supplement (https://proceedings.mlr.press/v139/rahman21a.html)
Supplement: Supplementary file 3 [file rahman21a-supp.zip › ICMLSupportingDoc 2/Visualization/OpenFortAttackRes/TRAIN/DGN-MARL_Test/run-.-tag-Rewards_adhoc_test8.csv]

Wall time	Step	Value
1611071847.9486222	0	-7.525000095367432
1611073014.776066	50	-7.512499809265137
1611074160.8246741	100	-7.868888854980469
1611075314.7144108	150	-6.241666793823242
1611076443.8504457	200	-5.484615325927734
1611077591.731281	250	-6.4391303062438965
1611078734.4957063	300	-4.176743984222412
1611079871.1703148	350	-5.755882263183594
1611081005.6707606	400	-6.3423075675964355
1611082138.9044924	450	-6.802856922149658
1611083274.855368	500	-5.213889122009277
1611084426.5045264	550	-5.715384483337402
1611085569.5328205	600	-7.602438926696777
1611086695.2014906	650	-7.324390411376953
1611087835.9067287	700	-5.5545454025268555
1611088989.7494414	750	-6.0
1611090141.2229745	800	-4.222448825836182
1611091289.6983767	850	-5.969565391540527
1611092430.9980986	900	-4.0804877281188965
1611093585.5738914	950	-6.636734485626221
1611094720.850992	1000	-6.07027006149292
1611095862.9405122	1050	-6.517021179199219
1611097009.6854818	1100	-7.099999904632568
1611098147.880867	1150	-5.818420886993408
1611099292.9526155	1200	-4.7265305519104
1611100441.0693247	1250	-6.677083492279053
1611101564.7266896	1300	-7.511111259460449
1611102704.7301445	1350	-5.685714244842529
1611103855.1839352	1400	-4.460526466369629
1611105017.9888642	1450	-6.01578950881958
1611106155.566971	1500	-4.949999809265137
1611107301.347979	1550	-7.134210586547852
1611108443.756954	1600	-6.619999885559082
1611109591.0555835	1650	-7.069767475128174
1611110735.178417	1700	-4.491666793823242
1611111875.7148645	1750	-6.214285850524902
1611113007.0228295	1800	-5.300000190734863
1611114127.9625316	1850	-4.865789413452148
1611115276.897274	1900	-5.282608509063721
1611116417.136324	1950	-8.217948913574219
1611117571.529599	2000	-7.949999809265137
1611118697.249283	2050	-6.54878044128418
1611119845.9628515	2100	-6.253488540649414
1611121004.7781723	2150	-6.843589782714844
1611122165.781583	2200	-7.5722222328186035
1611123337.4321773	2250	-4.5
1611124489.8054247	2300	-4.699999809265137
1611125653.4910665	2350	-5.004444599151611
1611126820.2334635	2400	-4.681395530700684
1611127956.5328655	2450	-2.980487823486328
1611129094.1034827	2500	-5.07941198348999
1611130241.9115236	2550	-4.4476189613342285
1611131384.828338	2600	-6.044444561004639
1611132520.7808795	2650	-5.900000095367432
1611133666.0223017	2700	-4.094594478607178
1611134807.3401225	2750	-5.1710524559021
1611135950.1474366	2800	-8.416000366210938
1611137086.6204975	2850	-4.551281929016113
1611138225.6111	2900	-6.5171427726745605
1611139380.6394958	2950	-5.17391300201416
1611140508.2076423	3000	-5.317307472229004
1611141659.9671195	3050	-5.570000171661377
1611142822.2061162	3100	-6.371794700622559
1611143976.051979	3150	-5.855555534362793
1611145122.3195534	3200	-2.657575845718384
1611146279.2416394	3250	-3.2454545497894287
1611147426.8174093	3300	-5.167346954345703
1611148563.1016629	3350	-4.789795875549316
1611149706.6367588	3400	-6.916666507720947
1611150834.2993813	3450	-4.920833110809326
1611151969.2376444	3500	-5.625640869140625
1611153099.7731419	3550	-3.034883737564087
1611154244.2310457	3600	-8.76111125946045
1611155374.2432265	3650	-5.006896495819092
1611156514.3345587	3700	-5.235000133514404
1611157646.0160615	3750	-1.6936169862747192
1611158786.4822502	3800	-3.0174999237060547
1611159923.2965221	3850	-3.924999952316284
1611161045.3456588	3900	-1.731428623199463
1611162187.47904	3950	-3.582352876663208
1611163341.32126	4000	-4.993333339691162
1611164513.3725946	4050	-3.8222222328186035
1611165674.8898685	4100	-3.6449999809265137
1611166829.2414036	4150	-2.1104166507720947
1611167972.1585257	4200	-6.372727394104004
1611169117.7473214	4250	-3.6878788471221924
1611170259.1374233	4300	-3.379166603088379
1611171394.4265578	4350	-4.863157749176025
1611172525.184028	4400	-4.440476417541504
1611173666.2792988	4450	-4.467857360839844
1611174798.8324077	4500	-3.274468183517456
1611175920.241376	4550	-5.722222328186035
1611177084.9057696	4600	-1.260465145111084
1611178228.1537163	4650	-5.9489359855651855
1611179381.5115814	4700	-4.260000228881836
1611180520.9597685	4750	-3.3255319595336914
1611181663.4621158	4800	-3.971428632736206
1611182809.8247523	4850	-4.448979377746582
1611183956.786745	4900	-5.181579113006592
1611185088.450926	4950	-6.073529243469238
1611186094.957079	5000	-5.5615386962890625
