# Supplementary material
Source: ML conference proceedings conference paper supplement (https://proceedings.mlr.press/v139/rahman21a.html)
Supplement: Supplementary file 3 [file rahman21a-supp.zip › ICMLSupportingDoc 2/Visualization/OpenFortAttackRes/TRAIN/DGN-Only-Test/run-mlgbmswohu-tag-Rewards_eval.csv]

Wall time	Step	Value
1601223635.6657841	0	-6.953488349914551
1601224551.1751394	1	-3.9961538314819336
1601225477.893757	2	-2.490000009536743
1601226394.8953474	3	-5.508108139038086
1601227308.3583267	4	-6.8956522941589355
1601228232.617179	5	-4.2272725105285645
1601229154.35392	6	-4.083333492279053
1601230069.3279142	7	-5.237500190734863
1601230988.853663	8	-3.927500009536743
1601231902.638346	9	-3.2242424488067627
1601232819.406235	10	-3.4097561836242676
1601233736.594032	11	-4.211904525756836
1601234654.5800054	12	-3.4194445610046387
1601235567.7708776	13	-5.479411602020264
1601236487.9116435	14	-4.725714206695557
1601237402.7532434	15	-3.234375
1601238313.5409782	16	-2.002631664276123
1601239224.933557	17	-8.146666526794434
1601240143.7275167	18	-4.774509906768799
1601241056.1596737	19	-2.0085713863372803
1601241966.770155	20	-1.6885714530944824
1601242882.365699	21	-2.5239999294281006
1601243801.5557122	22	-3.321951150894165
1601244712.5103614	23	-1.8704545497894287
1601245620.188825	24	-3.508333444595337
1601246533.2580776	25	-2.8658535480499268
1601247439.2984612	26	-3.31333327293396
1601248356.5489185	27	0.8790697455406189
1601249270.690159	28	-0.6243902444839478
1601250180.0045745	29	-1.975000023841858
1601251084.9343255	30	-4.234042644500732
1601252001.3481922	31	-1.5540000200271606
1601252911.0205643	32	-3.7486486434936523
1601253819.5880556	33	-5.460000038146973
1601254728.1068544	34	-0.7749999761581421
1601255641.1495686	35	-1.7690476179122925
1601256552.7341568	36	-2.2705881595611572
1601257461.1511495	37	-0.44130435585975647
1601258361.0300133	38	-1.4333332777023315
1601259268.437398	39	-4.6607842445373535
1601260174.5383816	40	-0.7088888883590698
1601261079.9413729	41	-1.287500023841858
1601261986.2504911	42	0.9750000238418579
1601262890.2960167	43	0.008928571827709675
1601263790.7418842	44	-0.27916666865348816
1601264688.1654196	45	0.16969697177410126
1601265592.996674	46	0.3062500059604645
1601266478.8673122	47	-0.7722222208976746
1601267362.3907871	48	2.827777862548828
1601268246.4991214	49	-1.6375000476837158
1601269127.9159117	50	4.010526180267334
1601270006.2879188	51	1.615789532661438
1601270879.08705	52	-5.188889026641846
1601271753.589427	53	6.268627643585205
1601272626.6124587	54	1.7342857122421265
1601273501.2149036	55	2.7833333015441895
1601274374.0483859	56	6.417391300201416
1601275250.154171	57	4.431914806365967
1601276124.2692142	58	0.1594594568014145
1601287786.1351545	59	-4.546341419219971
1601288675.1279066	60	-0.17058824002742767
1601289558.3579118	61	5.3740739822387695
1601290437.673083	62	-0.06666667014360428
1601291311.779817	63	0.5555555820465088
1601292179.8682644	64	0.7866666913032532
1601293259.4114518	65	-0.6852940917015076
1601294371.8196278	66	-2.6948719024658203
1601295487.1054516	67	0.2461538463830948
1601296596.0954669	68	0.4185185134410858
1601297706.2614	69	2.5878047943115234
1601298795.107704	70	1.9666666984558105
1601299881.8364162	71	2.6500000953674316
1601300955.9154181	72	5.911110877990723
1601302017.9826386	73	9.59756088256836
1601303069.3433175	74	8.996874809265137
1601304114.9852912	75	9.306249618530273
1601305150.4952354	76	7.266666889190674
1601306163.6432357	77	-2.7166666984558105
1601307181.328938	78	7.581250190734863
1601308182.385409	79	3.414583444595337
1601309174.9810143	80	9.055102348327637
1601310150.1684544	81	8.516071319580078
1601311076.8762574	82	8.468965530395508
1601311992.702489	83	5.134210586547852
1601312890.2750776	84	7.163265228271484
1601313756.3394828	85	8.330434799194336
1601314616.0095344	86	8.84117603302002
1601315477.0152814	87	7.285416603088379
1601316335.1355808	88	13.125
1601317191.3554175	89	8.933333396911621
1601318051.9742014	90	9.038000106811523
1601318910.6579254	91	12.019354820251465
1601319771.5117571	92	9.06176471710205
1601320636.635082	93	11.418000221252441
1601321492.0027118	94	8.288888931274414
1601322350.0029159	95	9.825806617736816
1601323213.800394	96	12.477777481079102
1601324073.227338	97	9.037036895751953
1601324934.4280126	98	14.727272987365723
1601325791.9507413	99	14.548148155212402
1601326659.282566	100	10.133333206176758
