# Supplementary material
Source: ML conference proceedings conference paper supplement (https://proceedings.mlr.press/v139/rahman21a.html)
Supplement: Supplementary file 3 [file rahman21a-supp.zip › ICMLSupportingDoc 2/Visualization/OpenFortAttackRes/TRAIN/DGN-Only-Test/run-mlxrkfjbxy-tag-Rewards_eval.csv]

Wall time	Step	Value
1601223652.2538717	0	-4.94444465637207
1601224585.3771179	1	-3.143749952316284
1601225518.609395	2	-4.5
1601226446.163739	3	-5.611111164093018
1601227371.1224499	4	-3.7238094806671143
1601228298.987181	5	-4.150000095367432
1601229234.2423828	6	-3.108163356781006
1601230165.3448834	7	-2.5975608825683594
1601231100.0971236	8	-3.9978723526000977
1601232025.2527716	9	-4.233333110809326
1601232946.5210006	10	-7.789285659790039
1601233868.8349311	11	-2.442307710647583
1601234798.9156725	12	-2.9369564056396484
1601235731.0118203	13	-3.1914894580841064
1601236659.228686	14	-6.441176414489746
1601237594.1330059	15	-3.375
1601238513.8228352	16	-7.933333396911621
1601239440.1066544	17	-3.952380895614624
1601240370.6141038	18	-3.825000047683716
1601241298.1077754	19	-5.725581169128418
1601242221.0139337	20	-1.0909091234207153
1601243147.7411044	21	-2.5999999046325684
1601244074.0090187	22	-1.6535714864730835
1601244998.639393	23	-3.5676469802856445
1601245921.883305	24	-2.7129032611846924
1601246841.917435	25	-1.7636363506317139
1601247764.8226497	26	-0.24250000715255737
1601248687.7382023	27	-5.176666736602783
1601249606.606339	28	-2.409677505493164
1601250526.915892	29	-2.246875047683716
1601251450.5077193	30	-2.4240000247955322
1601252381.0987225	31	-1.2203704118728638
1601253302.2957752	32	-2.4509804248809814
1601254223.4757516	33	-1.5488371849060059
1601255140.7474885	34	-1.0583332777023315
1601256068.0108328	35	-1.2682926654815674
1601256990.239985	36	-1.7911111116409302
1601257906.1541786	37	-2.457777738571167
1601258823.998773	38	-1.605555534362793
1601259733.0229552	39	-2.8064515590667725
1601260640.2746735	40	0.24716980755329132
1601261547.5362794	41	0.4567567706108093
1601262463.9055858	42	5.958333492279053
1601263367.4540896	43	1.6725000143051147
1601264276.8460991	44	3.5939393043518066
1601265181.0277572	45	4.945097923278809
1601266080.2510455	46	5.196226596832275
1601266970.82009	47	6.042553424835205
1601267857.8681545	48	3.299999952316284
1601268742.6175954	49	3.872499942779541
1601269630.980525	50	7.349999904632568
1601270509.8553333	51	-3.2857143878936768
1601271388.1406703	52	2.507692337036133
1601272275.156571	53	3.1083333492279053
1601273159.6710086	54	4.329268455505371
1601274039.515538	55	-3.5333333015441895
1601274917.2455823	56	1.9615384340286255
1601275807.8926952	57	5.702173709869385
1601276686.3137817	58	3.6312499046325684
1601277556.3278322	59	7.1785712242126465
1601278427.3499377	60	5.995999813079834
1601279293.8070636	61	8.507692337036133
1601280158.0142784	62	6.31315803527832
1601281027.3084102	63	0.17073170840740204
1601281897.361298	64	8.827083587646484
1601282771.0852454	65	8.157407760620117
1601283636.2105093	66	8.088461875915527
1601284498.1549196	67	6.610344886779785
1601285369.9487052	68	4.658064365386963
1601286247.748538	69	8.815217018127441
1601287115.3899982	70	8.297778129577637
1601287980.4560385	71	4.526086807250977
1601288852.0178947	72	2.5411765575408936
1601289719.4495943	73	10.121739387512207
1601290589.0908089	74	10.856521606445312
1601291461.4209163	75	4.585714340209961
1601292336.7981162	76	7.993750095367432
1601293272.9025974	77	8.978723526000977
1601294208.7028425	78	12.0
1601295144.1931562	79	10.155881881713867
1601296072.505227	80	7.28249979019165
1601297010.3344169	81	11.331707000732422
1601297940.682018	82	9.576470375061035
1601298874.7270303	83	10.944186210632324
1601299794.242199	84	3.7727272510528564
1601300726.7671683	85	7.4723405838012695
1601301643.3501148	86	10.25
1601302554.6480694	87	7.410526275634766
1601303466.4825954	88	7.754054069519043
1601304368.9448943	89	7.634285926818848
1601305269.9153888	90	8.569697380065918
1601306163.188774	91	7.129166603088379
1601307058.8042812	92	6.1769232749938965
1601307936.4277797	93	9.23720932006836
1601308818.5221345	94	12.986538887023926
1601309697.1033006	95	5.973684310913086
1601325120.8258107	96	6.226666450500488
1601326021.9407117	97	9.235714316368103
1601326911.8113742	98	7.4105262756347656
1601327822.9981418	99	9.102325677871704
1601328708.434843	100	8.4909090995788574
