# Supplementary material
Source: ML conference proceedings conference paper supplement (https://proceedings.mlr.press/v139/rahman21a.html)
Supplement: Supplementary file 3 [file rahman21a-supp.zip › ICMLSupportingDoc 2/Visualization/OpenFortAttackRes/TRAIN/DGN-Only-Test/run-naeudyfitb-tag-Rewards_eval.csv]

Wall time	Step	Value
1601223646.7926083	0	-6.869565010070801
1601224564.8664534	1	-5.997674465179443
1601225481.4846232	2	-5.634210586547852
1601226398.457111	3	-5.388571262359619
1601227310.5281906	4	-5.691891670227051
1601228227.3079288	5	-6.946938991546631
1601229140.6141498	6	-6.442105293273926
1601230058.8157768	7	-4.103846073150635
1601230973.5779257	8	-5.427586078643799
1601231885.2501059	9	-2.891176462173462
1601232796.358711	10	-7.895237922668457
1601233714.4634593	11	-5.5615386962890625
1601234628.8275447	12	-4.777500152587891
1601235546.239421	13	-5.278182029724121
1601236467.8580558	14	-2.697674512863159
1601237381.4016976	15	-1.9171428680419922
1601238294.4633746	16	-3.984999895095825
1601239207.8787916	17	-2.3885715007781982
1601240125.1427078	18	-2.902127742767334
1601241041.154646	19	-1.2418181896209717
1601241950.5167396	20	-5.636956691741943
1601242861.5306838	21	-1.0096774101257324
1601243776.1498783	22	-1.9404255151748657
1601244690.4276135	23	-3.788095235824585
1601245595.7536693	24	-5.159375190734863
1601246503.5865333	25	-1.559999942779541
1601247404.320219	26	-4.282608509063721
1601248318.3270974	27	-3.4864864349365234
1601249222.8428156	28	-1.8636363744735718
1601250134.7382762	29	-0.2571428716182709
1601251042.265743	30	-0.9883720874786377
1601251958.9724934	31	1.2434782981872559
1601252872.3671672	32	-4.057407379150391
1601253782.2836232	33	-2.3450000286102295
1601254691.331425	34	-1.8071428537368774
1601255600.7602336	35	-3.996875047683716
1601256508.0013669	36	-2.0114285945892334
1601257411.2930183	37	2.9000000953674316
1601258317.174085	38	-1.822448968887329
1601259222.050872	39	-1.1047619581222534
1601260121.329332	40	-0.8958333134651184
1601261023.3043993	41	2.1191489696502686
1601261926.3737833	42	-1.5750000476837158
1601262825.262431	43	-0.20975609123706818
1601263719.81774	44	1.5138888359069824
1601264616.1036646	45	5.486000061035156
1601265510.6698284	46	1.9735294580459595
1601266381.884785	47	6.570967674255371
1601267255.0981898	48	3.4156863689422607
1601268122.2071707	49	4.422222137451172
1601268993.5810037	50	2.4295454025268555
1601269860.1983037	51	10.459524154663086
1601270733.9518712	52	3.4119999408721924
1601271607.9823062	53	5.087179660797119
1601272471.9123826	54	-1.3242424726486206
1601273341.522827	55	8.03600025177002
1601274202.541786	56	0.8103448152542114
1601275067.262496	57	5.254347801208496
1601275939.0979593	58	7.470212936401367
1601276804.2260897	59	-0.07619047909975052
1601277661.4573002	60	-0.2611111104488373
1601278519.444003	61	7.315555572509766
1601279378.59983	62	5.418367385864258
1601280241.782049	63	6.0625
1601281100.5081024	64	6.39310359954834
1601281964.345637	65	5.021153926849365
1601282827.1038709	66	6.69767427444458
1601283679.4941592	67	1.654054045677185
1601284541.8526998	68	-1.8666666746139526
1601285408.9452705	69	4.454999923706055
1601286273.466589	70	6.926666736602783
1601287133.3702927	71	6.93684196472168
1601287997.8226042	72	5.457446575164795
1601288861.5047038	73	4.8326921463012695
1601289719.1408336	74	5.08863639831543
1601290580.068785	75	6.908823490142822
1601291438.1557097	76	8.498147964477539
1601292286.244158	77	6.4162163734436035
1601293206.0199246	78	11.180000305175781
1601294133.5557141	79	12.844898223876953
1601295057.9113991	80	11.129091262817383
1601295982.638899	81	9.994544982910156
1601296902.9406278	82	4.0428571701049805
1601297817.494488	83	1.6465116739273071
1601298736.7862034	84	5.214285850524902
1601299654.6677911	85	6.376595973968506
1601300570.0671124	86	6.146874904632568
1601301486.0259154	87	9.407546997070312
1601302387.1741655	88	9.95862102508545
1601303286.4715016	89	8.021052360534668
1601304188.2262003	90	9.711111068725586
1601305086.518735	91	7.609090805053711
1601305982.590628	92	12.483673095703125
1601306868.0969403	93	12.810714721679688
1601307740.1603134	94	12.475757598876953
1601308607.1521785	95	9.356249809265137
1601309474.3808746	96	11.976190567016602
1601325061.04261	97	6.1184210777282715
1601325953.4743562	98	7.5176472663879395
1601326851.0155609	99	13.9452381134033203
1601327752.8175216	100	11.0299999713897705
