# Supplementary material
Source: ML conference proceedings conference paper supplement (https://proceedings.mlr.press/v139/rahman21a.html)
Supplement: Supplementary file 3 [file rahman21a-supp.zip › ICMLSupportingDoc 2/Visualization/OpenFortAttackRes/TRAIN/DGN-Only-Test/run-ofsjzqgtwm-tag-Rewards_eval.csv]

Wall time	Step	Value
1601223679.2862556	0	-5.794117450714111
1601224587.5668015	1	-2.7750000953674316
1601225500.3416653	2	-6.894339561462402
1601226408.8454988	3	-3.268420934677124
1601227314.7898836	4	-5.397674560546875
1601228222.694211	5	-5.183870792388916
1601229135.0667162	6	-6.987804889678955
1601230047.1970773	7	-4.470454692840576
1601230967.664859	8	-2.3651163578033447
1601231877.069899	9	-4.364285945892334
1601232784.7701588	10	-5.324999809265137
1601233690.921978	11	-4.382758617401123
1601234600.7298968	12	-4.612500190734863
1601235510.6963592	13	-4.282051086425781
1601236420.8249404	14	-3.180000066757202
1601237329.4564276	15	-4.420000076293945
1601238235.1501951	16	-9.852380752563477
1601239143.1564505	17	-3.8622641563415527
1601240053.276787	18	-5.503125190734863
1601240961.7363026	19	-1.270909070968628
1601241867.0282545	20	-3.844444513320923
1601242773.6969478	21	-4.480952262878418
1601243680.5241542	22	-1.0833333730697632
1601244587.2830558	23	-2.0303030014038086
1601245492.370793	24	-4.209374904632568
1601246392.9456604	25	-3.332352876663208
1601247295.4350357	26	-3.7179486751556396
1601248205.8081803	27	-1.899999976158142
1601249114.565423	28	-2.3565218448638916
1601250016.222503	29	-2.788571357727051
1601250918.8280616	30	-3.2282052040100098
1601251825.131929	31	-5.844117641448975
1601252732.6345196	32	-2.0738096237182617
1601253638.6828501	33	-4.1553192138671875
1601254545.5940115	34	-4.229411602020264
1601255453.0551517	35	-2.1885714530944824
1601256360.2872612	36	0.05000000074505806
1601257257.2283502	37	-1.5536584854125977
1601258158.4481902	38	-2.7029411792755127
1601259055.5558696	39	-2.9488372802734375
1601259947.912661	40	-6.208695888519287
1601260846.0763874	41	0.6127659678459167
1601261748.4707842	42	0.03620689734816551
1601262654.3482974	43	-0.6309523582458496
1601263549.3246138	44	-2.5799999237060547
1601264441.936743	45	0.16511628031730652
1601265337.14307	46	2.4277777671813965
1601266216.8144798	47	-1.1111111640930176
1601267093.6724398	48	0.23181818425655365
1601267964.2827885	49	-0.20555555820465088
1601268828.8298619	50	7.035714149475098
1601269697.4641292	51	4.473913192749023
1601270570.059089	52	1.7583333253860474
1601271427.6852598	53	-5.015384674072266
1601272293.640506	54	-1.0022727251052856
1601273152.8446956	55	2.299999952316284
1601274005.2378728	56	4.793548583984375
1601274873.3719616	57	2.044736862182617
1601275740.927157	58	4.122448921203613
1601276604.1685455	59	1.6818181276321411
1601277456.682619	60	0.6710526347160339
1601278308.5336082	61	4.567347049713135
1601279159.11779	62	3.538888931274414
1601280002.753769	63	-1.881818175315857
1601280850.9759667	64	6.708510875701904
1601281703.3606458	65	6.068749904632568
1601282545.1644173	66	4.425806522369385
1601283390.752417	67	0.26153847575187683
1601284240.4834619	68	5.610344886779785
1601285088.7193062	69	3.0062499046325684
1601285932.1733482	70	-0.8199999928474426
1601286786.0690343	71	2.8490195274353027
1601287643.9058292	72	2.098076820373535
1601288499.8255215	73	4.1686272621154785
1601289342.5634367	74	-0.8999999761581421
1601290196.97385	75	6.400000095367432
1601291053.3083532	76	8.638636589050293
1601291903.6162968	77	6.545714378356934
1601292783.8466926	78	7.102499961853027
1601293704.2515686	79	11.186111450195312
1601294618.1384246	80	8.918749809265137
1601295535.8685641	81	6.277358531951904
1601296444.858066	82	5.722580432891846
1601297364.1946287	83	5.386956691741943
1601298277.4640138	84	6.882926940917969
1601299188.329774	85	-3.430769205093384
1601300099.98175	86	8.303999900817871
1601301014.7233255	87	12.078378677368164
1601301915.698421	88	5.869999885559082
1601302812.2868984	89	8.062745094299316
1601303705.126394	90	6.684999942779541
1601304594.9753132	91	4.738888740539551
1601305484.3224037	92	8.457500457763672
1601306371.0358946	93	8.112244606018066
1601307256.4662774	94	9.045098304748535
1601308119.629983	95	3.3027026653289795
1601308984.1780424	96	9.206382751464844
1601309843.6803894	97	7.208107948303223
1601325190.67068	98	8.9749999046325684
1601326078.6917953	99	11.4979166984558105
1601326963.8218431	100	9.46666666865348816
