# Supplementary material
Source: ML conference proceedings conference paper supplement (https://proceedings.mlr.press/v139/rahman21a.html)
Supplement: Supplementary file 3 [file rahman21a-supp.zip › ICMLSupportingDoc 2/Visualization/OpenFortAttackRes/TRAIN/DGN-Only-Test/run-rqjimwpcct-tag-Rewards_eval.csv]

Wall time	Step	Value
1601223672.5977771	0	-6.5789475440979
1601224586.8611085	1	-3.853658437728882
1601225501.5884273	2	-3.2730770111083984
1601226417.2646344	3	-1.8153846263885498
1601227330.7515829	4	-3.5176470279693604
1601228247.686287	5	-5.187878608703613
1601229165.7396078	6	-3.9387755393981934
1601230082.8634064	7	-4.964705944061279
1601231005.2011697	8	-4.182000160217285
1601231918.7318447	9	-3.961538553237915
1601232833.526491	10	-4.468571662902832
1601233752.7061713	11	-5.800000190734863
1601234665.3434417	12	-4.099999904632568
1601235581.794269	13	-2.718918800354004
1601236502.8029463	14	-3.4431371688842773
1601237423.9320242	15	-1.9282609224319458
1601238335.5787487	16	-3.410416603088379
1601239250.5501192	17	-4.926530838012695
1601240161.2662501	18	-2.8107142448425293
1601241077.7306263	19	-1.7940000295639038
1601241988.2820814	20	-7.509523868560791
1601242900.6680706	21	-3.1571428775787354
1601243813.2089128	22	-3.8184211254119873
1601244723.80539	23	-4.684999942779541
1601245638.6647851	24	-4.504000186920166
1601246545.4118335	25	-5.918919086456299
1601247455.6351562	26	-1.542222261428833
1601248365.9386086	27	-1.254054069519043
1601249273.518879	28	-7.677272796630859
1601250182.1520078	29	-2.7266666889190674
1601251087.468736	30	-2.4024999141693115
1601251995.1012661	31	-1.4088234901428223
1601252903.402069	32	0.6299999952316284
1601253801.352142	33	-2.28947377204895
1601254702.0011277	34	-1.4270269870758057
1601255610.8312397	35	3.063636302947998
1601256521.7131183	36	2.0808510780334473
1601257413.677091	37	-0.8725000023841858
1601258307.1853962	38	-2.661224603652954
1601259210.161732	39	3.582608699798584
1601260093.3828294	40	-5.869999885559082
1601260981.590776	41	-0.10312499850988388
1601261876.8038428	42	2.6413042545318604
1601262768.9808335	43	3.3085105419158936
1601263663.7924297	44	3.169642925262451
1601264554.4470918	45	-0.5447368621826172
1601265442.9093478	46	1.3914285898208618
1601266319.464973	47	3.8127660751342773
1601267184.102261	48	1.9041666984558105
1601268053.6267092	49	0.32499998807907104
1601268929.1998613	50	2.4191489219665527
1601269799.3146932	51	2.0863635540008545
1601270663.6366947	52	-1.0
1601271534.843535	53	3.7233333587646484
1601272404.462641	54	3.7441177368164062
1601273270.3398535	55	2.844444513320923
1601274136.8015432	56	4.735294342041016
1601274998.4828517	57	4.462857246398926
1601275867.8115952	58	5.327450752258301
1601276726.9220939	59	-2.0071427822113037
1601277576.3883123	60	-1.9392857551574707
1601278440.0679088	61	10.47234058380127
1601279293.5691488	62	8.603846549987793
1601280149.9938881	63	7.575555324554443
1601281008.0013258	64	11.29285717010498
1601281867.5822	65	5.546666622161865
1601282718.100542	66	3.881999969482422
1601283573.168044	67	3.621621608734131
1601284425.4304934	68	9.314285278320312
1601285283.6958175	69	10.448837280273438
1601286138.445997	70	7.607142925262451
1601286997.719466	71	6.066666603088379
1601287850.3586154	72	7.671428680419922
1601288707.2742538	73	10.737500190734863
1601289559.1549146	74	7.827907085418701
1601290403.1298797	75	1.399999976158142
1601291265.7712438	76	8.982000350952148
1601292130.291768	77	5.461999893188477
1601293039.5666127	78	8.619047164916992
1601293960.7876809	79	11.180487632751465
1601294881.1608799	80	8.666666984558105
1601295798.7779825	81	4.057142734527588
1601296715.9500387	82	8.213725090026855
1601297634.2285137	83	6.177550792694092
1601298554.3586888	84	7.621276378631592
1601299479.0329928	85	11.521568298339844
1601300391.7018063	86	7.875555515289307
1601301296.95008	87	7.275000095367432
1601302196.5244718	88	5.0804877281188965
1601303089.0362859	89	3.496875047683716
1601303984.9220405	90	6.042424201965332
1601304876.222167	91	6.382143020629883
1601305773.8101337	92	5.243243217468262
1601306655.6473997	93	8.416000366210938
1601307527.4229968	94	7.025531768798828
1601308395.8556564	95	6.456756591796875
1601309264.3594997	96	3.623255729675293
1601324947.2234523	97	5.354166507720947
1601325854.3531518	98	8.4718749523162842
1601326753.7235458	99	6.807142734527588
1601327658.378571	100	7.2923078536987305
