# Supplementary material
Source: ML conference proceedings conference paper supplement (https://proceedings.mlr.press/v139/rahman21a.html)
Supplement: Supplementary file 3 [file rahman21a-supp.zip › ICMLSupportingDoc 2/Visualization/OpenFortAttackRes/TRAIN/DGN-Only-Test/run-vjjzntwsiz-tag-Rewards_eval.csv]

Wall time	Step	Value
1601223632.109565	0	-3.835897445678711
1601224548.733802	1	-5.714285850524902
1601225465.3505404	2	-4.427586078643799
1601226380.9338439	3	-3.722916603088379
1601227292.522076	4	-4.914000034332275
1601228207.0866983	5	-5.974999904632568
1601229120.30356	6	-5.83695650100708
1601230038.9637246	7	-2.2639999389648438
1601230955.13742	8	-1.059259295463562
1601231869.1183593	9	-1.3566666841506958
1601232779.4867918	10	-3.8176469802856445
1601233688.451693	11	-6.203225612640381
1601234600.4136817	12	-2.4272727966308594
1601235517.0279906	13	-2.937142848968506
1601236430.4971635	14	-3.299999952316284
1601237345.2351267	15	-3.9767441749572754
1601238256.5107503	16	-3.63611102104187
1601239168.3314044	17	-4.376923084259033
1601240078.925352	18	-4.077142715454102
1601240987.387505	19	-3.7068965435028076
1601241899.3194578	20	-2.737499952316284
1601242806.4053552	21	-5.640740871429443
1601243714.6900904	22	-7.1421051025390625
1601244623.174489	23	-2.284210443496704
1601245531.5222397	24	-4.491489410400391
1601246429.2298133	25	-3.5999999046325684
1601247329.0877497	26	-2.651515245437622
1601248233.6935952	27	-2.7886364459991455
1601249140.5721502	28	-0.9384615421295166
1601250042.338555	29	-1.2404255867004395
1601250934.9750268	30	-0.12727272510528564
1601251839.6422005	31	2.6244444847106934
1601252739.1093578	32	-1.0812499523162842
1601253636.7227871	33	0.5953488349914551
1601254525.4885042	34	2.6454546451568604
1601255420.4943829	35	-2.0
1601256313.3060236	36	8.991999626159668
1601257208.262489	37	3.1044445037841797
1601258092.931939	38	-2.6818182468414307
1601258986.2232304	39	1.6551724672317505
1601259871.8838909	40	-0.7451612949371338
1601260756.0612981	41	-0.54347825050354
1601261645.4583735	42	1.6684210300445557
1601262535.0588088	43	1.4175000190734863
1601263415.1036725	44	-2.3142857551574707
1601264302.368051	45	0.06538461893796921
1601265185.216297	46	-5.119999885559082
1601266069.566759	47	3.826530694961548
1601266946.8541856	48	1.7690476179122925
1601267819.3132818	49	-0.5666666626930237
1601268691.15045	50	6.888636589050293
1601269555.193467	51	-7.031034469604492
1601270417.291175	52	3.905555486679077
1601271294.129311	53	7.5
1601272167.1890585	54	3.2228572368621826
1601273036.7305448	55	3.9024391174316406
1601273905.556157	56	3.3918919563293457
1601274780.8429887	57	2.5196077823638916
1601275656.2900467	58	3.674999952316284
1601276528.4651513	59	6.074999809265137
1601277386.5227928	60	6.521276473999023
1601278243.681365	61	5.8741936683654785
1601279097.4818428	62	8.085714340209961
1601279959.3901532	63	8.012499809265137
1601280814.9739876	64	7.5806450843811035
1601281668.6805782	65	1.5297297239303589
1601282537.5758271	66	5.282608509063721
1601283405.1311367	67	7.7419352531433105
1601284253.1810772	68	4.6181817054748535
1601285107.3599675	69	-2.2071428298950195
1601285964.8436813	70	3.9317073822021484
1601286819.2360678	71	0.07777778059244156
1601287676.8050616	72	6.507999897003174
1601288542.1983297	73	6.435999870300293
1601289399.867148	74	5.976315975189209
1601290253.7712655	75	6.545454502105713
1601291115.235946	76	3.2714285850524902
1601291974.9576542	77	3.797222137451172
1601292874.4993303	78	5.703845977783203
1601293797.023066	79	6.125
1601294722.7572494	80	4.039024353027344
1601295642.9352164	81	6.3684210777282715
1601296569.0857122	82	6.377777576446533
1601297494.9249485	83	3.6852941513061523
1601298415.0717068	84	3.6025640964508057
1601299335.1749363	85	5.976922988891602
1601300253.8806086	86	5.860000133514404
1601301168.3882527	87	3.148780584335327
1601302083.2277315	88	9.621428489685059
1601302988.5314133	89	7.342592716217041
1601303885.0391176	90	4.5731706619262695
1601304781.9607306	91	0.13409091532230377
1601305684.6452112	92	9.178788185119629
1601306574.7499259	93	6.508333206176758
1601307457.5476673	94	8.649999618530273
1601308320.8357594	95	4.645454406738281
1601309192.6507897	96	5.484000205993652
1601324736.759744	97	8.3172414302825928
1601325654.5615692	98	6.234375
1601326571.7035077	99	7.1027027368545532
1601327486.3425148	100	4.394444465637207
