# Supplementary material
Source: ML conference proceedings conference paper supplement (https://proceedings.mlr.press/v139/rahman21a.html)
Supplement: Supplementary file 3 [file rahman21a-supp.zip › ICMLSupportingDoc 2/Visualization/OpenFortAttackRes/TRAIN/DGN-Only-Test/run-xidnmtcxpe-tag-Rewards_eval.csv]

Wall time	Step	Value
1601223670.4015815	0	-4.795238018035889
1601224594.7186625	1	-5.924444675445557
1601225517.6215816	2	-5.38095235824585
1601226437.916251	3	-6.206976890563965
1601227358.69303	4	-5.581818103790283
1601228279.6100948	5	-2.4166667461395264
1601229203.6764574	6	-3.7617647647857666
1601230126.7270539	7	-3.7419354915618896
1601231050.623914	8	-6.694594383239746
1601231969.1047106	9	-3.686046600341797
1601232888.6204784	10	-5.1529412269592285
1601233808.28892	11	-5.268571376800537
1601234728.6600401	12	-4.528947353363037
1601235648.8123085	13	-4.5586957931518555
1601236572.0802915	14	-1.6071428060531616
1601237486.6551228	15	-2.5999999046325684
1601238402.2081032	16	-0.3037036955356598
1601239319.4182308	17	-4.691489219665527
1601240239.9462712	18	-4.602380752563477
1601241158.8530943	19	-4.085999965667725
1601242078.0199206	20	-2.0021276473999023
1601242994.4549522	21	-1.962499976158142
1601243912.056052	22	-1.7636363506317139
1601244829.8106313	23	-3.1666667461395264
1601245738.873445	24	-2.128124952316284
1601246651.3852677	25	-1.8422222137451172
1601247558.188509	26	-2.7513513565063477
1601248475.7962906	27	-2.029545545578003
1601249393.1430864	28	4.5276594161987305
1601250300.9316313	29	-0.550000011920929
1601251206.6729753	30	0.010810811072587967
1601252117.9649537	31	-0.28723403811454773
1601253031.2811124	32	2.8081631660461426
1601253946.7570608	33	1.1094340085983276
1601254852.1675806	34	-1.1222221851348877
1601255766.2224927	35	1.2319148778915405
1601256676.967033	36	-3.80975604057312
1601257583.84872	37	-0.5617021322250366
1601258491.722487	38	2.9574999809265137
1601259395.6606123	39	0.24117647111415863
1601260292.746528	40	3.386666774749756
1601261190.8143687	41	-0.385294109582901
1601262093.4484398	42	1.8764705657958984
1601262998.0213306	43	2.138000011444092
1601263906.0477548	44	1.6733332872390747
1601264806.3745089	45	1.8704545497894287
1601265706.962907	46	0.6000000238418579
1601266586.804806	47	1.244444489479065
1601267462.9680607	48	0.11999999731779099
1601268348.8638515	49	2.7981131076812744
1601269232.0819824	50	3.5538461208343506
1601270107.125134	51	4.613461494445801
1601270986.0062847	52	3.8354837894439697
1601271871.1290722	53	4.562963008880615
1601272742.1155715	54	0.3380952477455139
1601273617.915766	55	4.38139533996582
1601274488.5824397	56	2.165957450866699
1601275362.5889118	57	5.8681817054748535
1601276240.709201	58	0.3446808457374573
1601277108.9326284	59	-1.4517241716384888
1601277977.5626903	60	4.711904525756836
1601278841.003055	61	5.650000095367432
1601279703.3125243	62	4.0685715675354
1601280565.9711597	63	7.321739196777344
1601281433.0648513	64	4.150000095367432
1601282297.9792218	65	6.658695697784424
1601283165.718445	66	5.286486625671387
1601284023.156695	67	1.7999999523162842
1601284891.6870909	68	4.218918800354004
1601285755.5298574	69	4.285416603088379
1601286616.0164979	70	6.090000152587891
1601287472.2249424	71	4.634782791137695
1601288334.3086178	72	3.6205127239227295
1601289189.9076605	73	6.605714321136475
1601290053.1069553	74	6.7173075675964355
1601290918.699494	75	8.44444465637207
1601291782.17975	76	3.366666555404663
1601292665.8670874	77	6.07111120223999
1601293593.2173324	78	4.357142925262451
1601294516.7387605	79	2.8404762744903564
1601295444.517189	80	5.432258129119873
1601296367.409448	81	2.1564102172851562
1601297287.9192598	82	6.553333282470703
1601298213.7380283	83	6.305882453918457
1601299139.2878213	84	9.423076629638672
1601300057.2831259	85	8.216129302978516
1601300977.6874692	86	7.290909290313721
1601301889.3399422	87	8.246428489685059
1601302796.4360075	88	7.1823530197143555
1601303708.4196963	89	8.010000228881836
1601304611.7722845	90	9.024999618530273
1601305515.4078279	91	9.823912620544434
1601306415.4599032	92	8.384905815124512
1601307304.6648786	93	11.982000350952148
1601308165.341866	94	-0.9615384340286255
1601309041.0800512	95	8.84000015258789
1601309915.0812514	96	11.759523391723633
1601325273.3730624	97	-5.041999816894531
1601326165.835162	98	8.452777862548828
1601327065.6816764	99	7.294285774230957
1601327965.6680186	100	9.7973684072494507
