# Supplementary material
Source: ML conference proceedings conference paper supplement (https://proceedings.mlr.press/v139/rahman21a.html)
Supplement: Supplementary file 3 [file rahman21a-supp.zip › ICMLSupportingDoc 2/Visualization/OpenFortAttackRes/TRAIN/DGN-Only-Test/run-zmsfzjkpje-tag-Rewards_eval.csv]

Wall time	Step	Value
1601223657.6127977	0	-8.736842155456543
1601224568.5567605	1	-7.2828569412231445
1601225480.764554	2	-3.5620689392089844
1601226397.6560307	3	-3.072413682937622
1601227310.655433	4	-4.849999904632568
1601228219.8698313	5	-4.596774101257324
1601229134.1273284	6	-3.5642857551574707
1601230049.531933	7	-5.397959232330322
1601230964.6864974	8	-5.316666603088379
1601231873.0709836	9	-5.931034564971924
1601232784.8231852	10	-5.443243026733398
1601233694.6599987	11	-4.102941036224365
1601234602.6029422	12	-3.8064515590667725
1601235516.6911669	13	-3.3378379344940186
1601236434.296576	14	-6.435897350311279
1601237348.8851671	15	-4.3586955070495605
1601238253.697925	16	-2.305555582046509
1601239164.7691343	17	-4.828205108642578
1601240078.6954181	18	-3.563999891281128
1601240986.4365897	19	-2.2272727489471436
1601241894.7198956	20	-3.806666612625122
1601242807.974439	21	-2.7326531410217285
1601243719.6931403	22	-3.9738094806671143
1601244634.3398085	23	-4.082608699798584
1601245543.368087	24	-3.8025641441345215
1601246445.572024	25	-3.1812500953674316
1601247352.9677236	26	-5.834615230560303
1601248269.0259154	27	-5.505000114440918
1601249176.2209175	28	-5.548275947570801
1601250086.5667846	29	-2.8936169147491455
1601250988.590953	30	-2.5999999046325684
1601251902.2140663	31	-1.5878788232803345
1601252807.994504	32	-1.886206865310669
1601253713.5006013	33	-4.595348834991455
1601254622.522389	34	-4.113636493682861
1601255534.638579	35	-3.078125
1601256441.6816347	36	-3.0128204822540283
1601257349.0876148	37	-0.7659574747085571
1601258258.8896387	38	-4.492682933807373
1601259160.2089705	39	-3.8470587730407715
1601260063.0514796	40	-1.5111111402511597
1601260966.8943665	41	-3.115000009536743
1601261870.96428	42	-2.113793134689331
1601262778.6207666	43	-5.648889064788818
1601263682.3974957	44	-1.8250000476837158
1601264587.2971566	45	-3.997619152069092
1601265488.2828534	46	-2.582352876663208
1601266371.8380136	47	-6.582353115081787
1601267260.43502	48	-1.7435897588729858
1601268145.5186412	49	-4.3378376960754395
1601269033.1819022	50	-2.1542856693267822
1601269920.0079105	51	-1.255555510520935
1601270805.5100715	52	-2.0466666221618652
1601271690.4374764	53	-1.7744680643081665
1601272573.8321915	54	-1.899999976158142
1601273460.2997334	55	-2.7571427822113037
1601274346.5676734	56	-1.9629629850387573
1601275231.9103193	57	-0.15333333611488342
1601276114.3730114	58	-4.310714244842529
1601277000.4026666	59	-2.1446807384490967
1601277880.0511062	60	2.4023256301879883
1601278757.0698335	61	0.5806451439857483
1601279627.4259603	62	-4.885000228881836
1601280501.4300501	63	-0.29393938183784485
1601281375.9230487	64	-1.8444443941116333
1601282247.9572346	65	-1.5040816068649292
1601283120.6557567	66	1.9631578922271729
1601283994.8952866	67	0.3632653057575226
1601284872.3478327	68	-0.34761905670166016
1601285738.2981505	69	-0.4162162244319916
1601286613.853753	70	4.042553424835205
1601287481.9603837	71	-3.528571367263794
1601288356.1502738	72	0.8333333134651184
1601289222.6185195	73	-4.685714244842529
1601290099.14183	74	0.6521739363670349
1601290969.26312	75	2.688636302947998
1601291839.1475482	76	0.343478262424469
1601292743.9017534	77	2.54693865776062
1601293680.7845085	78	0.17027026414871216
1601294611.8563225	79	1.3733333349227905
1601295548.9843364	80	0.8465116024017334
1601296480.7783039	81	-3.6888887882232666
1601297417.2192183	82	0.2666666805744171
1601298353.193245	83	1.4315789937973022
1601299284.0146036	84	2.50789475440979
1601300210.3415108	85	3.6461539268493652
1601301139.0386436	86	4.574358940124512
1601302052.7130802	87	2.702439069747925
1601302961.5170345	88	-2.4785714149475098
1601303867.0537057	89	2.848275899887085
1601304783.0004025	90	0.09791667014360428
1601305695.3721423	91	3.9461538791656494
1601306589.7307665	92	1.6916667222976685
1601307478.5899558	93	2.549999952316284
1601308359.219521	94	3.968571424484253
1601309237.493028	95	4.288888931274414
1601324812.158536	96	4.9666666388511658
1601325712.1372507	97	3.3551020622253418
1601326613.7562048	98	4.14722222089767456
1601327523.8741195	99	5.262162208557129
1601328433.9058995	100	4.7186046242713928
