# Supplementary material
Source: ML conference proceedings conference paper supplement (https://proceedings.mlr.press/v139/rahman21a.html)
Supplement: Supplementary file 3 [file rahman21a-supp.zip › ICMLSupportingDoc 2/Visualization/OpenFortAttackRes/TRAIN/DGN-Only/run-mlgbmswohu-tag-Rewards_train_set.csv]

Wall time	Step	Value
1601223628.4029276	0	-6.090909004211426
1601224544.9593382	1	-4.04054069519043
1601225468.8689995	2	-3.0717391967773438
1601226387.4740083	3	-6.160465240478516
1601227299.6749954	4	-7.340909004211426
1601228221.5079641	5	-2.9000000953674316
1601229144.6591568	6	-5.637777805328369
1601230064.6611905	7	-6.902040958404541
1601230980.5313	8	-5.054054260253906
1601231896.1351054	9	-6.363636493682861
1601232809.7546737	10	-5.526190280914307
1601233726.8709223	11	-5.529268264770508
1601234645.2736056	12	-5.8692307472229
1601235561.857936	13	-4.438889026641846
1601236480.5947907	14	-3.708695650100708
1601237395.3221312	15	-5.206451416015625
1601238303.7555847	16	-9.161904335021973
1601239219.437097	17	-5.875
1601240133.8921635	18	-4.829166889190674
1601241048.826956	19	-2.262162208557129
1601241958.4361155	20	-3.348571538925171
1601242870.3102694	21	-2.973684310913086
1601243791.1814616	22	-2.5039215087890625
1601244702.9329555	23	-2.5027778148651123
1601245611.6376638	24	-4.224999904632568
1601246523.6653028	25	-1.8040000200271606
1601247431.814232	26	-4.199999809265137
1601248344.7615159	27	-3.8045454025268555
1601249259.8758128	28	-2.7757575511932373
1601250170.8266609	29	-5.14390230178833
1601251074.462903	30	-6.0615386962890625
1601251989.0674157	31	-1.6027777194976807
1601252903.063957	32	-2.859375
1601253811.5458899	33	-1.7823529243469238
1601254719.0071092	34	-5.7609758377075195
1601255630.5140212	35	-1.3380951881408691
1601256540.9031568	36	-5.4588236808776855
1601257449.6996543	37	-0.9863636493682861
1601258354.9433703	38	-0.19230769574642181
1601259255.7865372	39	-0.39722222089767456
1601260163.4021041	40	-1.5240000486373901
1601261069.9249358	41	1.4065217971801758
1601261973.271098	42	1.1575757265090942
1601262876.4340577	43	-4.21999979019165
1601263778.884988	44	-3.0433332920074463
1601264679.8659968	45	0.3888888955116272
1601265581.703935	46	2.011538505554199
1601266469.2352908	47	-0.4593749940395355
1601267351.9846377	48	-2.704545497894287
1601268238.080174	49	-0.9243243336677551
1601269117.1610842	50	-1.0390243530273438
1601269996.7454762	51	-0.4897959232330322
1601270875.2284975	52	3.5244898796081543
1601271740.8064766	53	1.7735294103622437
1601272616.415352	54	3.034883737564087
1601273488.3958213	55	3.4509434700012207
1601274359.5440257	56	6.523255825042725
1601275236.732803	57	3.9820001125335693
1601276114.357418	58	-0.4000000059604645
1601287777.1120903	59	-6.206060409545898
1601288664.7027671	60	-3.440624952316284
1601289543.4959736	61	3.268749952316284
1601290425.8880358	62	0.5404255390167236
1601291302.1519256	63	1.136842131614685
1601292168.931024	64	-4.235294342041016
1601293250.3858466	65	-2.3428571224212646
1601294361.1918783	66	2.4617648124694824
1601295476.586597	67	3.642857074737549
1601296588.425322	68	1.5499999523162842
1601297693.2644272	69	3.6571428775787354
1601298786.8492634	70	4.679591655731201
1601299869.1855812	71	4.925000190734863
1601300947.6683586	72	7.986666679382324
1601302004.6078727	73	7.784615516662598
1601303058.1958535	74	7.728000164031982
1601304103.1966178	75	10.85106372833252
1601305138.3006465	76	10.366666793823242
1601306158.1593938	77	7.382352828979492
1601307167.3529024	78	6.897619247436523
1601308169.4714878	79	7.084374904632568
1601309160.1769938	80	11.872221946716309
1601310134.9366505	81	10.40666675567627
1601311068.0690005	82	8.967857360839844
1601311981.939384	83	6.947272777557373
1601312878.8420267	84	9.85897445678711
1601313744.255302	85	7.482758522033691
1601314605.9083753	86	9.183673858642578
1601315464.735279	87	8.18979549407959
1601316325.2181973	88	11.664102554321289
1601317176.688885	89	6.421428680419922
1601318038.4808953	90	8.340741157531738
1601318900.3563437	91	7.753061294555664
1601319761.5111227	92	7.172916889190674
1601320623.2653399	93	10.595745086669922
1601321483.496456	94	7.114999771118164
1601322341.453116	95	7.832653045654297
1601323201.8736281	96	9.354166984558105
1601324064.1360877	97	7.459183692932129
1601324922.6641266	98	10.012765884399414
1601325782.4353883	99	10.641463279724121
1601326645.9430094	100	10.845000267028809
