# Supplementary material
Source: ML conference proceedings conference paper supplement (https://proceedings.mlr.press/v139/rahman21a.html)
Supplement: Supplementary file 3 [file rahman21a-supp.zip › ICMLSupportingDoc 2/Visualization/OpenFortAttackRes/TRAIN/DGN-Only/run-mlxrkfjbxy-tag-Rewards_train_set.csv]

Wall time	Step	Value
1601223644.516095	0	-5.838709831237793
1601224576.4805648	1	-6.841860294342041
1601225510.821735	2	-5.0604166984558105
1601226439.944829	3	-5.335294246673584
1601227360.9511788	4	-3.98888897895813
1601228292.149497	5	-6.57027006149292
1601229222.3372643	6	-5.4745097160339355
1601230155.9438508	7	-4.847499847412109
1601231089.3837981	8	-2.348275899887085
1601232019.3222659	9	-4.43055534362793
1601232940.5137959	10	-2.4000000953674316
1601233862.5187225	11	-4.666666507720947
1601234788.1567163	12	-5.599999904632568
1601235719.4740868	13	-4.2171430587768555
1601236653.6446245	14	-4.55555534362793
1601237582.2261007	15	-1.439130425453186
1601238508.162092	16	-4.491666793823242
1601239429.6102397	17	-3.9121952056884766
1601240363.4929755	18	-4.090566158294678
1601241288.4330132	19	-4.665789604187012
1601242210.2903318	20	-1.9387097358703613
1601243139.2654724	21	-4.135135173797607
1601244066.4764943	22	-3.5
1601244990.512562	23	-4.558333396911621
1601245913.5677233	24	-0.37826088070869446
1601246834.1225324	25	-4.056818008422852
1601247755.38948	26	-2.7142856121063232
1601248679.8859203	27	-5.4882354736328125
1601249599.7000377	28	-3.9483871459960938
1601250519.1645722	29	-0.6000000238418579
1601251438.576097	30	-0.8163265585899353
1601252367.637873	31	-4.360000133514404
1601253290.4044693	32	-2.4259259700775146
1601254213.1631756	33	-2.0
1601255130.6350195	34	1.4321428537368774
1601256059.334009	35	-0.7196078300476074
1601256979.1261098	36	-3.0324323177337646
1601257894.7567644	37	-1.1549999713897705
1601258814.2447278	38	-1.67380952835083
1601259725.8339097	39	-1.2999999523162842
1601260627.559118	40	1.1583333015441895
1601261536.9207695	41	1.7272727489471436
1601262450.9422193	42	4.268333435058594
1601263357.0386734	43	-0.08181817829608917
1601264268.195988	44	6.800000190734863
1601265167.1862192	45	5.189795970916748
1601266066.2994823	46	3.252380847930908
1601266958.5962412	47	4.119607925415039
1601267849.8499355	48	3.94038462638855
1601268732.0813253	49	2.4100000858306885
1601269619.1138883	50	7.754166603088379
1601270504.6635833	51	2.1392157077789307
1601271379.0348365	52	1.2454545497894287
1601272266.049597	53	5.419047832489014
1601273150.2433157	54	4.954166889190674
1601274034.7915893	55	2.993103504180908
1601274908.945447	56	1.286956548690796
1601275796.3018553	57	3.6211538314819336
1601276678.4105284	58	2.375675678253174
1601277548.0773954	59	5.986666679382324
1601278414.2453628	60	0.5
1601279287.2379897	61	8.704999923706055
1601280149.4815602	62	9.736000061035156
1601281018.463711	63	-0.7911764979362488
1601281884.6718044	64	6.4666666984558105
1601282757.354517	65	8.643750190734863
1601283629.0735986	66	6.949999809265137
1601284490.758942	67	5.0756754875183105
1601285361.2284448	68	4.646808624267578
1601286236.064011	69	8.46382999420166
1601287104.4461288	70	5.09354829788208
1601287974.5497398	71	5.120930194854736
1601288842.1677055	72	9.827500343322754
1601289713.0252264	73	10.2380952835083
1601290576.9087276	74	4.757894515991211
1601291449.9269884	75	4.319355010986328
1601292323.7311249	76	5.320588111877441
1601293260.0976899	77	7.871110916137695
1601294197.34916	78	4.771697998046875
1601295133.7451713	79	6.088571548461914
1601296062.8526304	80	6.920689582824707
1601296998.3327665	81	7.51800012588501
1601297931.035504	82	11.343181610107422
1601298861.559947	83	10.404254913330078
1601299785.624227	84	6.059999942779541
1601300714.237566	85	9.851666450500488
1601301635.6462996	86	10.45555591583252
1601302544.9960487	87	8.493332862854004
1601303457.5996943	88	10.256522178649902
1601304358.5633166	89	6.918518543243408
1601305261.429746	90	6.982142925262451
1601306157.0837498	91	6.553333282470703
1601307048.2837033	92	11.074999809265137
1601307924.0446026	93	7.462963104248047
1601308804.9693334	94	11.545238494873047
1601309688.6426861	95	8.259183883666992
1601325110.2607803	96	5.5090913772583
1601326013.9184654	97	9.789743661880493
1601326903.9940517	98	7.9882354736328125
1601327812.281767	99	6.4382352828979492
1601328700.499572	100	8.023529529571533
