# Supplementary material
Source: ML conference proceedings conference paper supplement (https://proceedings.mlr.press/v139/rahman21a.html)
Supplement: Supplementary file 3 [file rahman21a-supp.zip › ICMLSupportingDoc 2/Visualization/OpenFortAttackRes/TRAIN/DGN-Only/run-naeudyfitb-tag-Rewards_train_set.csv]

Wall time	Step	Value
1601223638.7752733	0	-5.205882549285889
1601224556.6704242	1	-5.900000095367432
1601225474.2537866	2	-4.570833206176758
1601226390.9523847	3	-6.685714244842529
1601227302.0772557	4	-7.060975551605225
1601228219.1351264	5	-8.100000381469727
1601229133.3647447	6	-7.281818389892578
1601230052.5162735	7	-5.208695888519287
1601230966.5673244	8	-8.815789222717285
1601231878.3197644	9	-8.785714149475098
1601232791.9483335	10	-4.809756278991699
1601233705.5009117	11	-6.486046314239502
1601234619.8285913	12	-4.462162017822266
1601235535.3956451	13	-4.948648452758789
1601236457.0457716	14	-4.9066667556762695
1601237373.544658	15	-5.317857265472412
1601238285.6144705	16	-4.724390029907227
1601239199.7987056	17	-3.137500047683716
1601240115.1601944	18	-0.9209302067756653
1601241026.9086566	19	-3.211111068725586
1601241941.0877266	20	-4.694736957550049
1601242853.5164769	21	-4.073469161987305
1601243765.957	22	-3.911628007888794
1601244682.091168	23	-2.3088889122009277
1601245589.3592272	24	-5.400000095367432
1601246496.5206594	25	-2.2916667461395264
1601247397.9881616	26	-5.354285717010498
1601248309.6017568	27	-4.332608699798584
1601249215.8985384	28	-3.012500047683716
1601250124.9419801	29	-0.0019607844296842813
1601251031.5025728	30	-1.4022222757339478
1601251946.903685	31	-2.7865383625030518
1601252859.4854214	32	-3.2238094806671143
1601253772.3799853	33	-2.171428680419922
1601254681.3632557	34	-2.3794872760772705
1601255593.8925076	35	-1.4976744651794434
1601256498.8519754	36	-3.4131579399108887
1601257402.922141	37	0.7378378510475159
1601258305.4674783	38	-3.3214285373687744
1601259211.3653798	39	-0.43888887763023376
1601260109.182155	40	-2.388000011444092
1601261009.9572449	41	-0.16969697177410126
1601261914.4067855	42	-1.4156862497329712
1601262815.1096764	43	-0.6480000019073486
1601263711.3473876	44	3.661764621734619
1601264603.5337849	45	8.104255676269531
1601265499.994135	46	6.355555534362793
1601266373.2942898	47	8.034615516662598
1601267242.5398297	48	3.7217390537261963
1601268113.8060195	49	4.686110973358154
1601268982.797859	50	5.929629802703857
1601269848.035475	51	8.636363983154297
1601270720.5580268	52	3.9312500953674316
1601271596.5473392	53	5.585999965667725
1601272463.2746737	54	-1.8533333539962769
1601273326.0358796	55	6.160416603088379
1601274195.4711444	56	4.303124904632568
1601275054.8310494	57	7.353658676147461
1601275926.7477376	58	6.538461685180664
1601276793.5658927	59	5.835999965667725
1601277652.5632722	60	0.16206896305084229
1601278507.9258053	61	6.852941036224365
1601279366.7123535	62	7.542553424835205
1601280229.6437173	63	5.6086955070495605
1601281090.947802	64	5.914893627166748
1601281951.606845	65	3.876086950302124
1601282815.8934026	66	4.47428560256958
1601283670.583307	67	-6.057142734527588
1601284538.1081455	68	5.815094470977783
1601285399.9877777	69	3.981818199157715
1601286265.452595	70	10.121052742004395
1601287123.61942	71	3.319354772567749
1601287987.0624197	72	5.059374809265137
1601288849.100487	73	4.409375190734863
1601289709.194862	74	6.205555438995361
1601290571.5989375	75	9.994736671447754
1601291425.4137955	76	7.650000095367432
1601292277.2302392	77	2.8538460731506348
1601293194.9489214	78	10.259614944458008
1601294120.177675	79	7.754166603088379
1601295043.5349212	80	9.441509246826172
1601295969.1228685	81	12.155555725097656
1601296893.4385674	82	7.752173900604248
1601297806.8454094	83	-3.604761838912964
1601298725.3857365	84	7.761224269866943
1601299642.3746705	85	8.459574699401855
1601300562.1766984	86	7.985416889190674
1601301472.8391044	87	7.07027006149292
1601302380.6487164	88	9.00943374633789
1601303275.8918877	89	10.295833587646484
1601304176.2701926	90	7.961538314819336
1601305077.5022361	91	12.699999809265137
1601305970.0945034	92	9.473333358764648
1601306852.5660844	93	7.492592811584473
1601307730.94026	94	11.627906799316406
1601308599.9042294	95	10.561701774597168
1601309463.5064886	96	10.058974266052246
1601325053.8040812	97	7.20652174949646
1601325948.2801912	98	7.1279070377349854
1601326842.561578	99	10.2607142925262451
1601327742.1049623	100	8.151724100112915
