# Supplementary material
Source: ML conference proceedings conference paper supplement (https://proceedings.mlr.press/v139/rahman21a.html)
Supplement: Supplementary file 3 [file rahman21a-supp.zip › ICMLSupportingDoc 2/Visualization/OpenFortAttackRes/TRAIN/DGN-Only/run-ofsjzqgtwm-tag-Rewards_train_set.csv]

Wall time	Step	Value
1601223672.9599082	0	-8.116278648376465
1601224580.1428483	1	-3.3125
1601225489.8243227	2	-8.94705867767334
1601226401.3820424	3	-6.687878608703613
1601227306.228064	4	-8.182608604431152
1601228215.8989005	5	-6.129729747772217
1601229126.1405687	6	-6.168181896209717
1601230037.429284	7	-5.327499866485596
1601230956.720144	8	-3.409803867340088
1601231867.7166607	9	-3.105405330657959
1601232778.2129812	10	-5.179999828338623
1601233684.420361	11	-5.370967864990234
1601234591.987981	12	-5.562790870666504
1601235502.3388221	13	-5.43055534362793
1601236413.0968509	14	-3.6777777671813965
1601237320.5888283	15	-4.777777671813965
1601238229.5791643	16	-3.9219512939453125
1601239132.1064036	17	-6.166666507720947
1601240046.9130003	18	-3.702040910720825
1601240948.6773603	19	-3.951612949371338
1601241860.8345072	20	-5.289361476898193
1601242764.5114558	21	-4.797059059143066
1601243669.9450881	22	-4.455555438995361
1601244579.2796836	23	-2.6605262756347656
1601245485.8635132	24	-0.9846153855323792
1601246385.5474699	25	-1.769444465637207
1601247286.650962	26	-4.3108696937561035
1601248197.4080129	27	-5.011904716491699
1601249103.6084297	28	-1.2155555486679077
1601250008.3168943	29	-4.9571428298950195
1601250910.5448663	30	-2.4744679927825928
1601251817.7752619	31	-2.5794870853424072
1601252723.704107	32	-1.8226414918899536
1601253627.6142123	33	-3.292105197906494
1601254534.8609283	34	-3.2300000190734863
1601255445.6041796	35	-2.3306121826171875
1601256349.6681871	36	-3.40256404876709
1601257247.9951634	37	-2.799999952316284
1601258150.8726234	38	-5.692592620849609
1601259046.924624	39	-2.5382351875305176
1601259942.838342	40	-2.7757575511932373
1601260834.5487788	41	-6.684615612030029
1601261733.4785292	42	-1.777500033378601
1601262643.818186	43	-1.0921568870544434
1601263539.8795354	44	-3.3343749046325684
1601264431.625129	45	-0.38064515590667725
1601265327.43088	46	0.8073170781135559
1601266207.9245677	47	-0.43437498807907104
1601267084.6865308	48	0.9632652997970581
1601267956.315271	49	-2.744736909866333
1601268821.947932	50	6.023809432983398
1601269686.1167881	51	3.768749952316284
1601270558.8702648	52	1.951111078262329
1601271424.231911	53	4.080769062042236
1601272284.4953327	54	2.3181817531585693
1601273142.9583166	55	3.5176470279693604
1601273996.2777214	56	3.7409090995788574
1601274863.0051732	57	1.5627450942993164
1601275728.6763616	58	5.551219463348389
1601276595.128294	59	1.9454545974731445
1601277446.3794954	60	5.1980390548706055
1601278296.1820083	61	2.192857027053833
1601279149.779495	62	6.128571510314941
1601279993.5137434	63	-2.6388888359069824
1601280839.118473	64	6.636000156402588
1601281693.4480104	65	7.908888816833496
1601282537.134213	66	5.0960001945495605
1601283382.4370158	67	1.2719999551773071
1601284233.060853	68	3.7804877758026123
1601285076.8654804	69	1.268965482711792
1601285923.4945254	70	-0.9120000004768372
1601286771.5753813	71	2.8961539268493652
1601287631.6518602	72	5.178048610687256
1601288487.5567727	73	2.816216230392456
1601289338.1492784	74	0.385185182094574
1601290186.3590398	75	4.696296215057373
1601291041.815457	76	8.15333366394043
1601291894.0907502	77	5.820689678192139
1601292772.546949	78	5.843478202819824
1601293692.926889	79	7.599999904632568
1601294607.7698302	80	7.461999893188477
1601295522.0939121	81	6.204761981964111
1601296435.698536	82	5.861363410949707
1601297351.2560368	83	8.027083396911621
1601298265.5282044	84	5.7260870933532715
1601299182.8547106	85	7.525862216949463
1601300086.0918813	86	7.6880950927734375
1601301003.7043	87	9.350000381469727
1601301903.20098	88	7.523404121398926
1601302799.8697157	89	8.982978820800781
1601303693.6940985	90	8.669230461120605
1601304584.6582747	91	2.3499999046325684
1601305473.9398685	92	9.966666221618652
1601306358.8637033	93	9.628571510314941
1601307242.625265	94	8.401723861694336
1601308110.692697	95	9.04651165008545
1601308972.5641525	96	4.551612854003906
1601309834.8014126	97	6.420000076293945
1601325182.624081	98	4.664285659790039
1601326066.1147168	99	7.141176462173462
1601326957.405846	100	8.293181896209717
