# Supplementary material
Source: ML conference proceedings conference paper supplement (https://proceedings.mlr.press/v139/rahman21a.html)
Supplement: Supplementary file 3 [file rahman21a-supp.zip › ICMLSupportingDoc 2/Visualization/OpenFortAttackRes/TRAIN/DGN-Only/run-rqjimwpcct-tag-Rewards_train_set.csv]

Wall time	Step	Value
1601223665.8189306	0	-5.925000190734863
1601224578.6799026	1	-5.111111164093018
1601225495.6542034	2	-5.013513565063477
1601226408.824762	3	-6.115789413452148
1601227322.4097602	4	-7.472093105316162
1601228240.5819464	5	-4.847222328186035
1601229156.2328446	6	-6.0676469802856445
1601230075.898884	7	-5.837209224700928
1601230993.769554	8	-4.521212100982666
1601231910.7824075	9	-4.616666793823242
1601232825.8175025	10	-5.765116214752197
1601233742.9300065	11	-5.464000225067139
1601234656.244452	12	-5.349999904632568
1601235573.6204565	13	-5.566666603088379
1601236491.5494227	14	-4.765625
1601237412.6901057	15	-4.924489974975586
1601238325.7733204	16	-3.6605262756347656
1601239240.382168	17	-5.868750095367432
1601240154.4541733	18	-4.160526275634766
1601241065.0537424	19	-1.6647058725357056
1601241982.9215293	20	-2.752173900604248
1601242892.4287982	21	-4.09499979019165
1601243804.7222614	22	-4.326315879821777
1601244714.5171	23	-2.971874952316284
1601245627.706151	24	-3.006382942199707
1601246536.9973235	25	-3.117142915725708
1601247444.3467379	26	-3.7153847217559814
1601248357.3628893	27	-2.7320001125335693
1601249267.9142466	28	-2.2093024253845215
1601250174.497325	29	-3.043137311935425
1601251076.7683828	30	-1.1363636255264282
1601251986.975111	31	-0.5933333039283752
1601252894.6820993	32	-2.68461537361145
1601253792.2882802	33	-2.024242401123047
1601254693.128492	34	2.567441940307617
1601255598.8993096	35	0.791304349899292
1601256509.137931	36	3.281395435333252
1601257404.858919	37	-1.1480000019073486
1601258296.2581599	38	-2.203571319580078
1601259197.783922	39	2.790740728378296
1601260089.5312622	40	2.700000047683716
1601260973.1905918	41	2.8820512294769287
1601261864.0692904	42	0.7340425252914429
1601262756.7026262	43	2.5239131450653076
1601263649.3525405	44	4.900000095367432
1601264543.6358395	45	2.581249952316284
1601265433.1569364	46	1.6581395864486694
1601266306.9936054	47	1.9311110973358154
1601267177.3761737	48	0.7131578922271729
1601268045.047969	49	4.675000190734863
1601268917.052188	50	3.4375
1601269787.857795	51	0.0325581394135952
1601270654.8898451	52	-0.5680000185966492
1601271527.2407901	53	3.578723430633545
1601272396.025378	54	5.097777843475342
1601273256.3739336	55	1.899999976158142
1601274127.8443959	56	7.09649133682251
1601274988.5869913	57	7.410638332366943
1601275854.2406185	58	4.063333511352539
1601276717.640817	59	-0.31081080436706543
1601277568.7758348	60	-3.1781249046325684
1601278425.1963382	61	8.491304397583008
1601279278.1882195	62	4.275000095367432
1601280138.1067789	63	3.936363697052002
1601280991.5412836	64	7.186046600341797
1601281856.4682598	65	4.247058868408203
1601282706.0728536	66	-2.9588234424591064
1601283563.57318	67	5.4019999504089355
1601284416.1199846	68	7.957446575164795
1601285271.356695	69	8.251219749450684
1601286129.1457248	70	6.3934783935546875
1601286985.4431818	71	7.361701965332031
1601287838.3141043	72	5.175000190734863
1601288696.7213662	73	10.093181610107422
1601289547.3568435	74	5.840909004211426
1601290395.0602527	75	-1.3416666984558105
1601291253.4025834	76	7.908474445343018
1601292117.9713619	77	4.1686272621154785
1601293027.148976	78	7.08297872543335
1601293948.0537622	79	5.95510196685791
1601294868.2397923	80	7.552000045776367
1601295790.4606748	81	4.34375
1601296701.900288	82	8.754545211791992
1601297619.9981391	83	6.365217208862305
1601298541.1423633	84	8.769767761230469
1601299464.6546855	85	11.901923179626465
1601300379.455709	86	7.604762077331543
1601301287.5736437	87	6.3655171394348145
1601302186.5181043	88	8.915789604187012
1601303081.7678366	89	5.422580718994141
1601303976.141778	90	11.595454216003418
1601304868.446969	91	4.770967960357666
1601305764.2706008	92	7.2265305519104
1601306648.74196	93	8.04888916015625
1601307515.635226	94	3.932142972946167
1601308385.203758	95	11.854762077331543
1601309253.8805559	96	10.079999923706055
1601324941.9613776	97	5.343902587890625
1601325847.573666	98	8.98799991607666
1601326748.4235644	99	8.75
1601327653.3060825	100	4.2324323654174805
