# Supplementary material
Source: ML conference proceedings conference paper supplement (https://proceedings.mlr.press/v139/rahman21a.html)
Supplement: Supplementary file 3 [file rahman21a-supp.zip › ICMLSupportingDoc 2/Visualization/OpenFortAttackRes/TRAIN/DGN-Only/run-vjjzntwsiz-tag-Rewards_train_set.csv]

Wall time	Step	Value
1601223623.2789018	0	-6.112195014953613
1601224540.364905	1	-5.502563953399658
1601225458.4632738	2	-8.262499809265137
1601226371.1003158	3	-4.7071428298950195
1601227282.7546961	4	-7.3222222328186035
1601228198.6659	5	-6.667646884918213
1601229112.3592591	6	-7.011111259460449
1601230028.276012	7	-7.460464954376221
1601230948.5735004	8	-6.659523963928223
1601231862.2167504	9	-4.440384387969971
1601232772.2368586	10	-3.724138021469116
1601233683.4345694	11	-6.168749809265137
1601234593.0586398	12	-4.562068939208984
1601235508.906064	13	-4.1617021560668945
1601236423.2766428	14	-5.317857265472412
1601237335.7452552	15	-4.034883499145508
1601238248.4276593	16	-3.553488254547119
1601239157.821712	17	-5.989743709564209
1601240070.5008712	18	-3.1848485469818115
1601240980.839326	19	-5.794594764709473
1601241888.453537	20	-1.7333333492279053
1601242799.5532014	21	-3.609302282333374
1601243709.5993426	22	-2.0999999046325684
1601244609.1522226	23	-8.43684196472168
1601245520.8538582	24	-0.11403508484363556
1601246422.1718814	25	-1.164285659790039
1601247321.3442998	26	-2.0595743656158447
1601248223.4091394	27	0.9052631855010986
1601249127.426311	28	-1.7307692766189575
1601250030.3776326	29	-3.1702702045440674
1601250925.9416618	30	-0.8824999928474426
1601251828.0435815	31	-0.9878048896789551
1601252731.1616013	32	1.5590908527374268
1601253626.2659411	33	-1.6549999713897705
1601254515.571543	34	-0.7333333492279053
1601255412.8814595	35	0.8808510899543762
1601256304.4233556	36	2.954545497894287
1601257195.7726557	37	0.3424242436885834
1601258086.6412368	38	-2.72702693939209
1601258977.901697	39	-0.30000001192092896
1601259862.9841666	40	4.297435760498047
1601260749.8697488	41	2.8959999084472656
1601261635.2542753	42	5.431818008422852
1601262524.5551553	43	2.713043451309204
1601263408.5546296	44	-1.591428518295288
1601264289.985176	45	-3.668750047683716
1601265180.32184	46	1.743749976158142
1601266056.5068202	47	2.909090995788574
1601266936.0165842	48	4.694230556488037
1601267808.0599992	49	1.9711538553237915
1601268678.9362645	50	2.5830187797546387
1601269549.4981017	51	-2.0821428298950195
1601270407.787888	52	1.3156249523162842
1601271278.721206	53	2.5466666221618652
1601272158.11559	54	0.06756756454706192
1601273026.4657059	55	-5.150000095367432
1601273895.561352	56	5.616279125213623
1601274767.5897615	57	1.100000023841858
1601275646.5071783	58	5.409999847412109
1601276518.301089	59	9.683333396911621
1601277374.7872071	60	6.723809719085693
1601278234.2074716	61	5.446666717529297
1601279085.615733	62	7.079999923706055
1601279947.4804916	63	4.025531768798828
1601280806.409401	64	6.333333492279053
1601281660.493085	65	-1.6281249523162842
1601282525.6044512	66	6.082608699798584
1601283395.6934235	67	7.560784339904785
1601284244.3981133	68	-4.699999809265137
1601285103.5358098	69	7.08297872543335
1601285954.6448622	70	2.909090995788574
1601286812.7831948	71	1.4414634704589844
1601287663.7224538	72	4.785294055938721
1601288530.1429985	73	4.522857189178467
1601289390.5879745	74	2.296875
1601290248.234683	75	7.925000190734863
1601291105.1648357	76	3.2088890075683594
1601291966.5670676	77	7.407142639160156
1601292866.9122221	78	2.890000104904175
1601293786.2125223	79	8.288636207580566
1601294713.7926233	80	9.600000381469727
1601295632.1342056	81	9.311538696289062
1601296558.0140877	82	8.610869407653809
1601297484.5824938	83	5.909999847412109
1601298404.5548463	84	6.05294132232666
1601299324.2019317	85	4.530303001403809
1601300245.792397	86	5.548275947570801
1601301159.1942105	87	8.903448104858398
1601302068.3890305	88	9.456097602844238
1601302975.4987586	89	9.967347145080566
1601303874.6480842	90	5.878125190734863
1601304773.2793634	91	-0.4243243336677551
1601305674.6491249	92	11.006382942199707
1601306563.6293828	93	8.56551742553711
1601307446.085515	94	7.269811153411865
1601308311.3491936	95	7.00454568862915
1601309186.5446386	96	12.21463394165039
1601324730.5669975	97	7.564864635467529
1601325648.5224621	98	6.270270347595215
1601326564.1750686	99	8.336111068725586
1601327479.982202	100	6.366666793823242
