# Supplementary material
Source: ML conference proceedings conference paper supplement (https://proceedings.mlr.press/v139/rahman21a.html)
Supplement: Supplementary file 3 [file rahman21a-supp.zip › ICMLSupportingDoc 2/Visualization/OpenFortAttackRes/TRAIN/DGN-Only/run-xidnmtcxpe-tag-Rewards_train_set.csv]

Wall time	Step	Value
1601223660.5786767	0	-6.822500228881836
1601224584.357581	1	-6.69523811340332
1601225509.6431017	2	-7.539535045623779
1601226427.9621723	3	-5.387499809265137
1601227351.4144855	4	-6.234000205993652
1601228272.4711375	5	-5.848484992980957
1601229194.8339713	6	-4.5756096839904785
1601230118.4045575	7	-4.776923179626465
1601231042.9124014	8	-4.949999809265137
1601231960.421175	9	-5.646874904632568
1601232880.8557003	10	-7.374285697937012
1601233800.8761253	11	-6.004651069641113
1601234720.0452888	12	-5.097560882568359
1601235639.4884799	13	-2.936842203140259
1601236565.1228998	14	-1.4147058725357056
1601237479.2094512	15	-8.436363220214844
1601238396.132488	16	-3.885714292526245
1601239309.2866542	17	-4.6891889572143555
1601240229.921327	18	-5.2658538818359375
1601241147.94774	19	-3.1583333015441895
1601242067.6256952	20	-1.3765957355499268
1601242985.2391229	21	-3.5896551609039307
1601243902.2098732	22	-3.309523820877075
1601244819.9693875	23	-2.9097561836242676
1601245731.2878966	24	-2.225925922393799
1601246640.0631888	25	-3.6177778244018555
1601247549.3530412	26	-0.011538461782038212
1601248464.7881277	27	-1.1519999504089355
1601249380.4727745	28	-1.875
1601250290.096308	29	-0.2879999876022339
1601251196.5754635	30	-0.9307692050933838
1601252105.5171413	31	-4.135135173797607
1601253018.4990423	32	0.009756097570061684
1601253932.6708403	33	0.25777778029441833
1601254845.546029	34	0.11025641113519669
1601255754.1306255	35	0.22830188274383545
1601256667.2612612	36	-0.18108108639717102
1601257572.6692493	37	-0.8199999928474426
1601258480.420131	38	0.726190447807312
1601259387.0025594	39	1.455814003944397
1601260283.1671498	40	0.8999999761581421
1601261181.829824	41	1.8079999685287476
1601262083.1068332	42	1.3914893865585327
1601262985.2976189	43	-0.402222216129303
1601263893.928143	44	-1.7372548580169678
1601264795.383611	45	1.4018518924713135
1601265694.706764	46	-0.7861111164093018
1601266580.5382357	47	4.8254899978637695
1601267452.3873856	48	-0.42903226613998413
1601268336.0717232	49	2.7219998836517334
1601269221.7515655	50	6.454761981964111
1601270092.4868197	51	2.366666555404663
1601270977.246488	52	6.593181610107422
1601271856.679224	53	5.240384578704834
1601272731.9539888	54	3.1481480598449707
1601273606.714432	55	1.336734652519226
1601274477.5889175	56	0.36216217279434204
1601275351.63016	57	5.997826099395752
1601276229.0834808	58	-0.017777778208255768
1601277102.4352758	59	3.2513513565063477
1601277966.7908635	60	6.202083110809326
1601278828.5020425	61	5.56862735748291
1601279695.082061	62	1.829545497894287
1601280554.020736	63	6.08965539932251
1601281421.6535556	64	3.780555486679077
1601282285.8856835	65	9.523077011108398
1601283156.571151	66	5.695652008056641
1601284015.3825452	67	2.373333215713501
1601284882.0761998	68	5.807407379150391
1601285744.3407793	69	2.986363649368286
1601286607.8632598	70	4.9659576416015625
1601287466.411993	71	6.124528408050537
1601288324.4897816	72	6.447825908660889
1601289181.585869	73	8.445454597473145
1601290039.9220524	74	7.719607830047607
1601290907.0553944	75	7.533962249755859
1601291771.8041227	76	8.18108081817627
1601292653.8101814	77	2.692857027053833
1601293586.1823437	78	4.623912811279297
1601294506.5187519	79	3.9964284896850586
1601295434.5710273	80	7.6534881591796875
1601296357.2574797	81	0.9820512533187866
1601297279.4630134	82	5.506451606750488
1601298202.6328106	83	8.779545783996582
1601299123.918971	84	7.008333206176758
1601300048.1993384	85	8.773077011108398
1601300969.1150916	86	7.891489505767822
1601301881.433501	87	8.076595306396484
1601302788.3414397	88	9.674468040466309
1601303695.5266125	89	11.91929817199707
1601304603.2270298	90	7.744444370269775
1601305503.2275915	91	8.223403930664062
1601306401.420377	92	8.956521987915039
1601307291.7838137	93	10.602128028869629
1601308161.271651	94	7.386666774749756
1601309030.170242	95	9.408888816833496
1601309904.4617608	96	8.939023971557617
1601325262.4003801	97	9.789285659790039
1601326158.5793087	98	6.509375095367432
1601327058.383005	99	7.4785714149475098
1601327956.6894765	100	8.203571319580078
