# Supplementary material
Source: ML conference proceedings conference paper supplement (https://proceedings.mlr.press/v139/rahman21a.html)
Supplement: Supplementary file 3 [file rahman21a-supp.zip › ICMLSupportingDoc 2/Visualization/OpenFortAttackRes/TRAIN/DGN-Only/run-zmsfzjkpje-tag-Rewards_train_set.csv]

Wall time	Step	Value
1601223650.8305411	0	-9.222222328186035
1601224562.1979568	1	-7.584210395812988
1601225473.287187	2	-7.0333333015441895
1601226385.3463666	3	-6.27297306060791
1601227301.0888157	4	-6.071698188781738
1601228213.514852	5	-5.743750095367432
1601229124.0536695	6	-6.571875095367432
1601230039.731002	7	-4.378378391265869
1601230955.5108118	8	-5.006060600280762
1601231866.9256263	9	-6.211111068725586
1601232776.697775	10	-2.779487133026123
1601233687.154183	11	-3.021212100982666
1601234595.040516	12	-4.291999816894531
1601235508.4387953	13	-5.167567729949951
1601236424.0786436	14	-7.514285564422607
1601237337.963804	15	-4.548275947570801
1601238245.6264925	16	-5.233333110809326
1601239155.6968327	17	-5.283720970153809
1601240068.5755553	18	-5.987179279327393
1601240977.4844484	19	-3.1290323734283447
1601241887.4085667	20	-1.2999999523162842
1601242798.336353	21	-4.988636493682861
1601243711.4627278	22	-3.3478260040283203
1601244624.2973726	23	-3.673170804977417
1601245534.9410977	24	-3.4348838329315186
1601246439.2842863	25	-4.458333492279053
1601247346.9580128	26	-2.4827585220336914
1601248260.3577504	27	-3.674999952316284
1601249169.35692	28	-2.6459460258483887
1601250076.8856103	29	-3.299999952316284
1601250982.7298393	30	-6.811428546905518
1601251894.1540043	31	-3.4289474487304688
1601252801.2249868	32	-3.1454546451568604
1601253704.1790278	33	-2.234999895095825
1601254613.1958692	34	-2.230952262878418
1601255525.978651	35	-0.9708333611488342
1601256433.089042	36	-5.311110973358154
1601257338.1651692	37	-4.5241379737854
1601258250.501186	38	-2.3794116973876953
1601259152.4236066	39	-2.0759999752044678
1601260055.2927773	40	-3.4071428775787354
1601260957.820638	41	-4.4666666984558105
1601261864.1397772	42	-2.9600000381469727
1601262769.1617825	43	-5.162499904632568
1601263675.1383846	44	-6.487500190734863
1601264578.7542062	45	-5.988571643829346
1601265477.7904606	46	-2.1666667461395264
1601266366.0084023	47	-5.9285712242126465
1601267251.618208	48	-3.297297239303589
1601268137.5776806	49	-2.851020336151123
1601269025.3672748	50	1.8916666507720947
1601269910.8001838	51	-2.6325581073760986
1601270794.6715965	52	-3.455263137817383
1601271680.2941248	53	-3.6194443702697754
1601272566.589071	54	-3.5594594478607178
1601273450.184924	55	-3.433333396911621
1601274340.8603015	56	-2.9571428298950195
1601275225.4057994	57	-1.7999999523162842
1601276108.2176104	58	1.85161292552948
1601276990.0838304	59	-0.5117647051811218
1601277869.0764208	60	-2.9906976222991943
1601278749.417182	61	-0.5540540814399719
1601279622.3838062	62	-1.2235294580459595
1601280493.1158214	63	-2.234090805053711
1601281366.6528308	64	-2.269230842590332
1601282237.652476	65	-1.100000023841858
1601283112.2260664	66	-2.5717949867248535
1601283983.8675268	67	1.8533333539962769
1601284863.0531433	68	2.382352828979492
1601285729.844291	69	0.5179487466812134
1601286601.824924	70	5.06862735748291
1601287477.0893872	71	-1.9615384340286255
1601288347.5915396	72	2.5999999046325684
1601289217.7752788	73	-1.188095211982727
1601290089.1509004	74	1.2897958755493164
1601290958.532478	75	0.6447368264198303
1601291829.3259451	76	-0.05263157933950424
1601292731.7662551	77	1.3979592323303223
1601293671.2810957	78	1.4256410598754883
1601294602.1632295	79	1.8096773624420166
1601295538.6865199	80	2.8399999141693115
1601296475.5352929	81	1.4916666746139526
1601297407.521459	82	1.3659090995788574
1601298343.3469899	83	0.7428571581840515
1601299275.0298479	84	3.1388888359069824
1601300199.6951532	85	4.360000133514404
1601301128.8347576	86	2.6761903762817383
1601302043.415183	87	-1.2078946828842163
1601302954.8707395	88	3.971428632736206
1601303859.138197	89	-8.225000381469727
1601304772.7478085	90	4.064000129699707
1601305682.9833307	91	2.93666672706604
1601306581.5194867	92	-2.5969696044921875
1601307469.516541	93	1.9645161628723145
1601308351.6723483	94	1.4675675630569458
1601309230.8631206	95	2.5357143878936768
1601324803.2366753	96	1.244736909866333
1601325701.3525574	97	2.8416666984558105
1601326606.6121364	98	0.4617021083831787
1601327514.9642222	99	2.0513513088226318
1601328424.8390682	100	2.7307692170143127
