# Supplementary material
Source: ML conference proceedings conference paper supplement (https://proceedings.mlr.press/v139/rahman21a.html)
Supplement: Supplementary file 3 [file rahman21a-supp.zip › ICMLSupportingDoc 2/Visualization/OpenFortAttackRes/TRAIN/DGN/run-eccbjqemxa-tag-Rewards_train_set.csv]

Wall time	Step	Value
1607099268.9607859	0	-6.696969509124756
1607100935.515068	1	-6.523809432983398
1607102617.6606824	2	-9.40666675567627
1607104284.4179063	3	-5.1710524559021
1607105956.186174	4	-7.504347801208496
1607107632.8534162	5	-4.834615230560303
1607109306.8070283	6	-4.693939208984375
1607110996.6643157	7	-3.644444465637207
1607112684.9899042	8	-5.311110973358154
1607114369.3261228	9	-5.606249809265137
1607116063.5882163	10	-3.3550000190734863
1607117776.1845758	11	-4.333333492279053
1607119424.404745	12	-5.189285755157471
1607121050.6200051	13	-4.739285945892334
1607122684.8362901	14	-3.643589735031128
1607124300.0875778	15	-4.418919086456299
1607125933.5609894	16	-4.636842250823975
1607127581.992596	17	-0.6622222065925598
1607129229.5030544	18	-3.848484754562378
1607130864.3483944	19	-2.4053571224212646
1607132501.1888452	20	-4.911864280700684
1607134119.250664	21	-5.1065216064453125
1607135751.7446237	22	-4.36122465133667
1607137352.340938	23	-2.9673912525177
1607138929.4292006	24	-6.513043403625488
1607140508.5091166	25	-5.532432556152344
1607142125.235301	26	-4.018918991088867
1607143737.413645	27	-4.133333206176758
1607145351.641149	28	-2.196296215057373
1607146961.7950568	29	-6.311764717102051
1607148561.381361	30	-2.5250000953674316
1607150128.332822	31	-2.1512820720672607
1607151700.4288366	32	-4.083673477172852
1607153276.8832915	33	-4.203773498535156
1607154865.9606566	34	-1.771052598953247
1607156488.7690961	35	-2.3297297954559326
1607158123.5620391	36	-4.4454545974731445
1607159757.7243145	37	-4.030303001403809
1607161374.8416433	38	-3.253999948501587
1607162995.4176593	39	-3.4357142448425293
1607164619.5989132	40	-4.132432460784912
1607166233.0213053	41	-0.7416666746139526
1607167845.7144942	42	-2.4312500953674316
1607169434.7535048	43	-3.1666667461395264
1607170933.1625898	44	-1.640625
1607172431.4578214	45	-1.3515151739120483
1607173939.4907176	46	-0.7396226525306702
1607175443.981708	47	0.36595743894577026
1607176938.0944796	48	0.7266666889190674
1607178419.2449548	49	3.253061294555664
1607179886.571311	50	0.9653061032295227
1607181379.472252	51	2.5020833015441895
1607182855.324445	52	5.842857360839844
1607184329.5558424	53	6.133333206176758
1607185781.6931965	54	1.6952381134033203
1607187252.1079423	55	1.1176470518112183
1607188737.5037658	56	-1.7825000286102295
1607190212.8262842	57	4.109804153442383
1607191694.4792743	58	5.355555534362793
1607193195.738984	59	4.471428394317627
1607194677.0185676	60	4.945833206176758
1607196167.0043397	61	7.921621799468994
1607197648.0349717	62	2.671428680419922
1607199133.3867123	63	5.742222309112549
1607200618.5775406	64	6.068749904632568
1607202107.6174648	65	7.442857265472412
1607203594.511599	66	4.390322685241699
1607205082.4866436	67	5.241860389709473
1607206585.2019932	68	2.642857074737549
1607208084.9666548	69	3.069047689437866
1607209581.8152478	70	2.3205883502960205
1607211084.2132444	71	2.5514285564422607
1607212571.9679644	72	7.3979997634887695
1607214055.8191798	73	4.574193477630615
1607215524.5612776	74	11.619999885559082
1607216985.3664486	75	7.339534759521484
1607218427.5386934	76	3.983783721923828
1607219896.0546508	77	9.156521797180176
1607221384.122481	78	5.853125095367432
1607222871.5473416	79	7.108928680419922
1607224350.4683025	80	6.734426021575928
1607225839.52016	81	5.940000057220459
1607227312.6608157	82	0.893750011920929
1607228780.063815	83	9.639215469360352
1607230235.8357806	84	5.194285869598389
1607231701.259868	85	8.03396224975586
1607233174.0600717	86	9.719148635864258
1607234626.9062521	87	3.7571427822113037
1607236080.9599261	88	6.961999893188477
1607237534.1340454	89	3.1971428394317627
1607238999.3473272	90	7.929166793823242
1607240454.857506	91	12.04594612121582
1607241913.475728	92	10.84761905670166
1607243358.8553061	93	10.122727394104004
1607244803.4051497	94	7.335484027862549
1607246246.6718771	95	10.338461875915527
1607247674.9241023	96	7.208510875701904
1607249113.6882744	97	10.025641441345215
1607250551.1031806	98	8.885106086730957
1607251998.910891	99	10.812766075134277
1607253350.0741642	100	7.62558126449585
