# Supplementary material
Source: ML conference proceedings conference paper supplement (https://proceedings.mlr.press/v139/rahman21a.html)
Supplement: Supplementary file 3 [file rahman21a-supp.zip › ICMLSupportingDoc 2/Visualization/OpenFortAttackRes/TRAIN/DGN/run-jlgvzcuaci-tag-Rewards_train_set.csv]

Wall time	Step	Value
1607099260.0987687	0	-6.7419352531433105
1607100972.6177945	1	-5.789743423461914
1607102686.6812356	2	-6.523684024810791
1607104373.06038	3	-5.628205299377441
1607106062.144335	4	-6.297059059143066
1607107755.3569682	5	-5.573684215545654
1607109421.8805745	6	-6.397368431091309
1607111054.0367072	7	-6.964864730834961
1607112688.2556298	8	-5.253846168518066
1607114327.90323	9	-2.986666679382324
1607115965.6515095	10	-5.512244701385498
1607117598.407076	11	-7.178048610687256
1607119245.5954485	12	-2.9636363983154297
1607120916.0983727	13	-2.5102040767669678
1607122566.9870582	14	-5.3045454025268555
1607124237.0252233	15	-5.5804877281188965
1607125864.241687	16	-2.890909194946289
1607127502.3740442	17	-2.154838800430298
1607129134.561625	18	-3.518918991088867
1607130749.9074092	19	-5.605882167816162
1607132367.982905	20	-4.023404121398926
1607133971.875228	21	-2.648780584335327
1607135574.04546	22	-6.197500228881836
1607137196.9926214	23	-4.038636207580566
1607138819.0251155	24	-3.066666603088379
1607140401.7683494	25	-4.87333345413208
1607142014.9121468	26	-2.2906250953674316
1607143633.752768	27	-2.434042453765869
1607145233.0611107	28	-3.211538553237915
1607146862.380707	29	-3.7874999046325684
1607148464.510076	30	-3.9229166507720947
1607150145.1901717	31	-3.3777778148651123
1607151769.9626281	32	-3.27368426322937
1607153387.2592509	33	-5.892000198364258
1607155000.975625	34	-0.6790697574615479
1607156631.4814906	35	-1.384615421295166
1607158266.8630064	36	-1.1211538314819336
1607159883.6712568	37	1.4777777194976807
1607161478.8560376	38	1.0739130973815918
1607163066.7659607	39	-2.045945882797241
1607164656.5803397	40	-0.33541667461395264
1607166235.5116217	41	-2.946666717529297
1607167809.9276457	42	-1.3116278648376465
1607169374.0227597	43	-1.8354166746139526
1607170855.2122586	44	-2.4000000953674316
1607172329.2051733	45	-1.9866666793823242
1607173809.9158282	46	0.004081632476300001
1607175277.300379	47	-1.8078947067260742
1607176746.5011435	48	-0.528205156326294
1607178230.487857	49	-1.340000033378601
1607179694.5686858	50	-1.1281249523162842
1607181168.3959916	51	3.7782609462738037
1607182641.3742375	52	1.0709677934646606
1607184106.1829097	53	-1.649999976158142
1607185560.8961165	54	-0.10232558101415634
1607187015.6535642	55	3.0738096237182617
1607188475.6443894	56	5.449999809265137
1607189953.3789694	57	1.2432432174682617
1607191423.087072	58	3.1848485469818115
1607192935.6085134	59	4.226415157318115
1607194448.5591283	60	6.264285564422607
1607195950.232102	61	3.8238096237182617
1607197440.218697	62	4.648648738861084
1607198941.0059497	63	6.007143020629883
1607200453.258719	64	8.510869979858398
1607201966.5724087	65	5.389655113220215
1607203469.3545601	66	8.411538124084473
1607204957.9080217	67	6.339130401611328
1607206435.8520477	68	2.990000009536743
1607207913.481576	69	3.2903225421905518
1607209385.881794	70	8.626667022705078
1607210870.8389027	71	7.960464954376221
1607212348.9225845	72	1.2894736528396606
1607213832.18529	73	10.350000381469727
1607215316.6658154	74	5.60357141494751
1607216795.118583	75	9.293103218078613
1607218258.661251	76	8.3804349899292
1607219746.4512165	77	5.573529243469238
1607221254.1490507	78	7.55555534362793
1607222749.5964181	79	11.460345268249512
1607224225.6440809	80	-0.6468750238418579
1607225685.9855874	81	8.035714149475098
1607227153.5338302	82	7.9679999351501465
1607228617.8404753	83	8.370731353759766
1607230067.565393	84	9.491110801696777
1607231499.4397302	85	10.806666374206543
1607232964.4949305	86	9.19615364074707
1607234437.1019678	87	10.2488374710083
1607235894.607137	88	8.970212936401367
1607237342.533829	89	7.284375190734863
1607238816.1981263	90	11.0469388961792
1607240298.3554313	91	8.505999565124512
1607241748.7284586	92	5.25
1607243186.0521686	93	9.273913383483887
1607244604.9235458	94	9.461538314819336
1607246027.3623707	95	10.582051277160645
1607247424.857405	96	6.306060791015625
1607248835.1117802	97	11.408163070678711
1607250267.2727382	98	9.082608222961426
1607251678.3719668	99	10.281481742858887
1607253052.8824692	100	9.41020393371582
