# Supplementary material
Source: ML conference proceedings conference paper supplement (https://proceedings.mlr.press/v139/rahman21a.html)
Supplement: Supplementary file 3 [file rahman21a-supp.zip › ICMLSupportingDoc 2/Visualization/OpenFortAttackRes/TRAIN/DGN/run-mhlkouvlhp-tag-Rewards_train_set.csv]

Wall time	Step	Value
1607099258.021391	0	-5.449999809265137
1607100935.0238192	1	-6.481818199157715
1607102634.174322	2	-6.0333333015441895
1607104348.0852463	3	-6.708333492279053
1607106013.7264283	4	-7.419444561004639
1607107656.9944065	5	-5.6583333015441895
1607109303.3051758	6	-7.02142858505249
1607110951.049782	7	-7.754761695861816
1607112601.2374034	8	-4.102127552032471
1607114239.3183665	9	-6.15925931930542
1607115878.824784	10	-7.746666431427002
1607117514.6443672	11	-5.238888740539551
1607119146.6547215	12	-4.777500152587891
1607120767.2677057	13	-4.014285564422607
1607122391.1714287	14	-2.810638189315796
1607123991.746175	15	-4.489999771118164
1607125640.8634248	16	-3.6424999237060547
1607127294.2876325	17	-3.24210524559021
1607128944.371568	18	-0.9227272868156433
1607130578.0115762	19	-3.4777777194976807
1607132200.4868546	20	-4.137499809265137
1607133824.8347666	21	-5.909523963928223
1607135457.8634987	22	-5.517948627471924
1607137095.053952	23	-4.086792469024658
1607138710.4615397	24	-2.3177778720855713
1607140310.6168842	25	-1.8581395149230957
1607141926.044268	26	-3.01111102104187
1607143567.5813806	27	-0.9694444537162781
1607145190.8261988	28	-0.9901960492134094
1607146803.3117907	29	-3.487499952316284
1607148410.4182546	30	-1.8333333730697632
1607149994.100103	31	0.48181816935539246
1607151612.2258718	32	3.022580623626709
1607153208.9761553	33	-0.4535714387893677
1607154807.2219305	34	-2.1925926208496094
1607156429.2745879	35	0.05576923117041588
1607158068.8530688	36	0.01875000074505806
1607159704.2597606	37	3.1259260177612305
1607161341.2601507	38	1.9310344457626343
1607162954.5193937	39	3.4200000762939453
1607164562.5018194	40	2.34375
1607166161.3876703	41	1.6076923608779907
1607167749.370111	42	1.1380000114440918
1607169323.0114102	43	6.68510627746582
1607170849.9635062	44	-0.4633333384990692
1607172352.8994527	45	0.739393949508667
1607173873.3266907	46	2.9326086044311523
1607175381.1663136	47	0.8617647290229797
1607176885.1625555	48	3.2224490642547607
1607178395.2121398	49	4.723255634307861
1607179926.2750976	50	9.84565258026123
1607181455.1182802	51	3.7265305519104004
1607182965.1787407	52	4.376315593719482
1607184478.8165944	53	6.547999858856201
1607185988.9649637	54	5.5428571701049805
1607187474.699582	55	4.560465335845947
1607188963.140612	56	8.758695602416992
1607190455.4774327	57	6.471111297607422
1607191932.394635	58	9.370270729064941
1607193373.6771536	59	8.675000190734863
1607194832.465725	60	4.39642858505249
1607196296.1515944	61	5.123912811279297
1607197751.6447284	62	4.559374809265137
1607199231.1689236	63	7.195918560028076
1607200722.9203348	64	5.170731544494629
1607202212.031517	65	2.2358975410461426
1607203665.9341283	66	7.045454502105713
1607205133.067043	67	8.489285469055176
1607206587.8569465	68	9.466666221618652
1607208048.8510423	69	5.542424201965332
1607209504.7481422	70	0.7666666507720947
1607210974.7566035	71	5.416666507720947
1607212458.714468	72	6.1823530197143555
1607213946.1378074	73	4.368292808532715
1607215442.4646134	74	3.2322580814361572
1607216933.4851215	75	8.377049446105957
1607218387.2211146	76	5.08965539932251
1607219859.8513072	77	2.9156250953674316
1607221343.6863275	78	8.416666984558105
1607222817.2329183	79	6.427451133728027
1607224293.0191398	80	8.342857360839844
1607225734.1374922	81	4.638095378875732
1607227171.5922685	82	8.957447052001953
1607228597.9862149	83	6.171111106872559
1607230020.8122067	84	1.3312499523162842
1607231449.4699135	85	6.317777633666992
1607232888.5815322	86	6.472548961639404
1607234344.3310955	87	8.974418640136719
1607235829.335211	88	9.773585319519043
1607237300.3681765	89	7.435714244842529
1607238783.469365	90	6.42553186416626
1607240241.5890644	91	4.599999904632568
1607241690.8788803	92	-4.276923179626465
1607243154.957528	93	8.195454597473145
1607244613.6732376	94	3.4803922176361084
1607246069.2327754	95	8.621999740600586
1607247517.267137	96	7.471428394317627
1607248964.7288156	97	8.695121765136719
1607250424.0322697	98	10.21363639831543
1607251876.223899	99	7.793333530426025
1607253293.9955246	100	9.801886558532715
