# Supplementary material
Source: ML conference proceedings conference paper supplement (https://proceedings.mlr.press/v139/rahman21a.html)
Supplement: Supplementary file 3 [file rahman21a-supp.zip › ICMLSupportingDoc 2/Visualization/OpenFortAttackRes/TRAIN/DGN/run-rqudscjlys-tag-Rewards_train_set.csv]

Wall time	Step	Value
1607099205.697252	0	-5.375
1607100892.444279	1	-8.336956977844238
1607102593.5976996	2	-6.781818389892578
1607104233.693148	3	-7.557142734527588
1607105859.151695	4	-4.7292680740356445
1607107495.2404027	5	-6.454166889190674
1607109133.3370202	6	-4.603448390960693
1607110765.2550392	7	-3.0333333015441895
1607112394.4430387	8	-5.148717880249023
1607114025.578049	9	-4.244444370269775
1607115654.364134	10	-4.920000076293945
1607117285.273119	11	-6.405714511871338
1607118912.6263103	12	-2.3816325664520264
1607120527.2817228	13	-5.78125
1607122136.248443	14	-5.55294132232666
1607123752.1164162	15	-2.9131579399108887
1607125381.3864183	16	-4.363157749176025
1607127027.3827672	17	-7.0511627197265625
1607128684.816157	18	-3.5233333110809326
1607130346.1544313	19	-4.0714287757873535
1607131999.5236993	20	-7.110256195068359
1607133648.95959	21	-4.366666793823242
1607135290.5988278	22	-4.904444217681885
1607136909.4282985	23	-1.8888888359069824
1607138499.1450825	24	-3.2941176891326904
1607140091.0813327	25	-4.362162113189697
1607141684.2742393	26	-1.8903846740722656
1607143310.6829093	27	-5.739473819732666
1607144933.7040431	28	-4.550000190734863
1607146545.8842418	29	-4.579487323760986
1607148140.9738076	30	-2.200000047683716
1607149748.290595	31	-4.233333110809326
1607151292.8608937	32	-2.4212121963500977
1607152856.8995967	33	-1.605263113975525
1607154450.290924	34	-3.950000047683716
1607156080.0018613	35	-2.9574999809265137
1607157719.5056536	36	-3.2354838848114014
1607159340.2774098	37	-2.9885714054107666
1607160938.7569458	38	-2.7846152782440186
1607162559.1303568	39	-1.708823561668396
1607164166.930416	40	-3.3384616374969482
1607165761.2476628	41	-0.9135135412216187
1607167353.4285274	42	0.09696969389915466
1607168953.4551904	43	-4.940540313720703
1607170476.1769898	44	0.8954545259475708
1607171976.389031	45	0.5742856860160828
1607173482.0679767	46	-4.824999809265137
1607174978.755734	47	-1.75
1607176483.9533734	48	1.6581395864486694
1607177998.4531615	49	-3.5740740299224854
1607179481.0486126	50	-4.551612854003906
1607180966.876811	51	-2.4749999046325684
1607182446.5494564	52	-0.12424242496490479
1607183925.8297546	53	-1.5
1607185405.3142486	54	3.876744270324707
1607186884.2429996	55	3.9078431129455566
1607188349.5139055	56	1.8156249523162842
1607189804.9269047	57	6.551351547241211
1607191253.9200523	58	7.736956596374512
1607192735.974116	59	2.7833333015441895
1607194228.2359476	60	3.2047619819641113
1607195734.311877	61	1.5586206912994385
1607197235.4196322	62	2.097297191619873
1607198736.6786888	63	2.046875
1607200242.246194	64	8.343103408813477
1607201746.2331278	65	4.524489879608154
1607203242.951374	66	5.306250095367432
1607204748.2950945	67	6.575861930847168
1607206244.7704759	68	1.3147058486938477
1607207730.5457366	69	8.596610069274902
1607209207.945417	70	6.293023109436035
1607210675.187209	71	-1.348888874053955
1607212133.1048908	72	3.804166555404663
1607213602.2816863	73	6.782222270965576
1607215078.1979883	74	5.882500171661377
1607216579.4101138	75	6.06037712097168
1607218080.344717	76	8.5
1607219535.9551256	77	-0.18636363744735718
1607221005.3629413	78	8.448936462402344
1607222476.3575943	79	4.69777774810791
1607223959.9890327	80	8.145097732543945
1607225421.5898492	81	9.942222595214844
1607226858.2289674	82	9.479069709777832
1607228282.7785037	83	8.556818008422852
1607229715.6096442	84	8.300000190734863
1607231171.3339894	85	5.832608699798584
1607232638.3605454	86	8.096428871154785
1607234083.7623293	87	10.325640678405762
1607235512.811858	88	7.72857141494751
1607236942.4448547	89	8.57209300994873
1607238374.9968257	90	6.568965435028076
1607239819.6205297	91	6.777500152587891
1607241258.4133492	92	10.300000190734863
1607242687.749018	93	2.0535714626312256
1607244119.5128462	94	-0.8333333134651184
1607245568.0618699	95	6.379032135009766
1607247016.1574435	96	8.423404693603516
1607248466.4923432	97	5.224073886871338
1607249901.9082541	98	4.914285659790039
1607251324.066425	99	9.335897445678711
1607252689.691494	100	7.005128383636475
