# Supplementary material
Source: ML conference proceedings conference paper supplement (https://proceedings.mlr.press/v139/rahman21a.html)
Supplement: Supplementary file 3 [file rahman21a-supp.zip › ICMLSupportingDoc 2/Visualization/OpenFortAttackRes/TRAIN/DGN/run-tmnwxmdfwv-tag-Rewards_train_set.csv]

Wall time	Step	Value
1607099275.8883681	0	-9.126190185546875
1607100956.061471	1	-4.762962818145752
1607102638.8892293	2	-6.150000095367432
1607104312.8464673	3	-5.873170852661133
1607105974.2878017	4	-7.35277795791626
1607107660.957695	5	-7.114999771118164
1607109356.0583992	6	-4.238888740539551
1607111043.3778079	7	-5.580392360687256
1607112733.8000417	8	-7.6315789222717285
1607114405.7256436	9	-5.506451606750488
1607116099.7981846	10	-5.305405616760254
1607117778.389569	11	-5.658536434173584
1607119453.2282152	12	-5.462500095367432
1607121116.4235358	13	-6.471428394317627
1607122722.1111944	14	-6.355172634124756
1607124312.8957937	15	-3.7049999237060547
1607125933.7866294	16	-4.596551895141602
1607127569.8671854	17	-5.137209415435791
1607129195.236251	18	-5.763888835906982
1607130808.9779131	19	-4.010000228881836
1607132411.225943	20	-5.239999771118164
1607134004.6670144	21	-4.215000152587891
1607135605.5631888	22	-2.819444417953491
1607137230.2110336	23	-5.011363506317139
1607138842.0776856	24	-3.7826087474823
1607140460.5372198	25	-6.0366668701171875
1607142072.292902	26	-9.190476417541504
1607143686.0306633	27	-2.958064556121826
1607145284.7933438	28	-3.7899999618530273
1607146873.301987	29	-3.9088234901428223
1607148442.5020173	30	-4.964705944061279
1607149999.0112476	31	-3.4208333492279053
1607151546.114155	32	-2.86388897895813
1607153105.855565	33	-1.4874999523162842
1607154672.2626448	34	-2.927586317062378
1607156294.4523172	35	-0.8030303120613098
1607157929.4209769	36	-1.7854167222976685
1607159535.9845865	37	-1.2342857122421265
1607161141.9022315	38	-2.122727155685425
1607162728.8566613	39	-1.8244444131851196
1607164314.705599	40	-4.597222328186035
1607165905.1229117	41	-1.5299999713897705
1607167489.1027281	42	1.25
1607169087.1125307	43	-0.7416666746139526
1607170581.1043818	44	-1.5551724433898926
1607172053.92313	45	-0.31351351737976074
1607173533.7514524	46	3.1466667652130127
1607175004.930442	47	6.9384613037109375
1607176476.5323792	48	4.234090805053711
1607177944.2489772	49	5.997727394104004
1607179393.8912191	50	2.493103504180908
1607180833.8578935	51	-3.472222328186035
1607182285.9959364	52	4.143137454986572
1607183749.2468743	53	3.2571427822113037
1607185201.1966512	54	4.1689653396606445
1607186667.706221	55	5.121951103210449
1607188134.4891732	56	4.877777576446533
1607189599.8198285	57	5.034782409667969
1607191091.594795	58	6.482222080230713
1607192582.987908	59	7.444680690765381
1607194089.409281	60	5.660465240478516
1607195591.6294181	61	9.050909042358398
1607197089.5115268	62	5.4476189613342285
1607198583.9050624	63	5.020930290222168
1607200091.1908352	64	9.254237174987793
1607201596.1532276	65	7.757143020629883
1607203105.473904	66	10.288679122924805
1607204589.196568	67	5.9911112785339355
1607206072.629903	68	6.583673477172852
1607207551.3844965	69	4.246666431427002
1607209043.4278996	70	3.926530599594116
1607210526.2626746	71	3.924489736557007
1607212026.389252	72	5.6566667556762695
1607213510.5047417	73	5.243478298187256
1607215007.54746	74	6.190908908843994
1607216509.7678068	75	7.717021465301514
1607218008.0714972	76	10.341666221618652
1607219497.6923847	77	9.084444046020508
1607220948.7795029	78	9.640909194946289
1607222422.216313	79	7.059999942779541
1607223898.144395	80	7.78125
1607225377.778973	81	4.71999979019165
1607226867.8100421	82	7.094444274902344
1607228374.5290475	83	2.3147058486938477
1607229878.879217	84	9.268750190734863
1607231384.5463073	85	7.7756757736206055
1607232877.479677	86	6.827272891998291
1607234363.8358817	87	9.360416412353516
1607235855.0134459	88	4.092592716217041
1607237335.8351464	89	8.73703670501709
1607238816.7214875	90	8.263830184936523
1607240287.0942814	91	4.987878799438477
1607241784.284589	92	8.96744155883789
1607243289.4927897	93	7.304255485534668
1607244812.8414745	94	8.835416793823242
1607246337.249392	95	9.135714530944824
1607247859.8203492	96	4.031818389892578
1607249378.245509	97	10.020000457763672
1607250893.3226726	98	10.03018856048584
1607252377.827539	99	7.68372106552124
1607253720.1966133	100	6.172549247741699
