# Supplementary material
Source: ML conference proceedings conference paper supplement (https://proceedings.mlr.press/v139/rahman21a.html)
Supplement: Supplementary file 3 [file rahman21a-supp.zip › ICMLSupportingDoc 2/Visualization/OpenFortAttackRes/TRAIN/DGN/run-ulcpziomis-tag-Rewards_train_set.csv]

Wall time	Step	Value
1607099272.2537851	0	-8.151219367980957
1607100984.9435112	1	-7.2482757568359375
1607102647.1790698	2	-6.349999904632568
1607104302.5908644	3	-6.9195122718811035
1607105958.0434632	4	-4.449019432067871
1607107620.9933665	5	-8.502174377441406
1607109278.8205442	6	-5.848936080932617
1607110935.4519916	7	-5.444117546081543
1607112608.5779927	8	-5.110526084899902
1607114277.0839524	9	-6.7324323654174805
1607115905.3778846	10	-6.074999809265137
1607117520.4897437	11	-3.805555582046509
1607119148.9259112	12	-2.2755556106567383
1607120781.092819	13	-4.483783721923828
1607122436.2356753	14	-4.222222328186035
1607124104.1428144	15	-4.681818008422852
1607125738.9706697	16	-4.963414669036865
1607127363.2543702	17	-1.9106383323669434
1607128992.871367	18	-2.0346152782440186
1607130621.590044	19	-5.706060409545898
1607132257.0909822	20	-7.663636207580566
1607133915.8098228	21	-2.7228572368621826
1607135570.9136822	22	-4.617948532104492
1607137227.9778123	23	-2.752173900604248
1607138873.1902936	24	-2.5103447437286377
1607140530.766509	25	-3.4000000953674316
1607142176.4473743	26	-2.805882453918457
1607143819.8733716	27	-4.372727394104004
1607145467.4334302	28	-4.46363639831543
1607147119.2233243	29	-1.3562500476837158
1607148770.293871	30	-6.666666507720947
1607150462.3039072	31	-4.225641250610352
1607152156.1673875	32	-3.034482717514038
1607153829.9679246	33	-2.180952310562134
1607155470.8078995	34	-4.256410121917725
1607157111.5423753	35	-2.9019999504089355
1607158746.7277868	36	-2.7057693004608154
1607160374.552237	37	-2.4384615421295166
1607162017.7647614	38	-0.7795918583869934
1607163646.9955351	39	-0.006976744160056114
1607165268.8317919	40	-3.1527273654937744
1607166907.9794574	41	-2.4837210178375244
1607168545.4097242	42	2.7174999713897705
1607170129.906565	43	-6.550000190734863
1607171657.8462293	44	-0.675000011920929
1607173189.930586	45	2.3020832538604736
1607174727.5145779	46	-0.012765957042574883
1607176269.7455754	47	-0.6520000100135803
1607177809.0260816	48	2.680000066757202
1607179362.676942	49	0.9930232763290405
1607180912.1409082	50	0.1471698135137558
1607182462.553453	51	1.2740740776062012
1607184008.5272853	52	3.2708332538604736
1607185525.4273255	53	0.7270269989967346
1607187043.2560139	54	-2.294285774230957
1607188549.0892372	55	1.6479166746139526
1607190060.6767755	56	1.6323529481887817
1607191575.2972584	57	4.996153831481934
1607193057.7842288	58	7.346808433532715
1607194530.8487585	59	4.369565010070801
1607196012.5998046	60	5.706818103790283
1607197493.3446867	61	2.132352828979492
1607198984.8360436	62	4.532142639160156
1607200463.210764	63	4.72352933883667
1607201921.3297775	64	4.2771430015563965
1607203386.9619892	65	-0.6833333373069763
1607204858.792515	66	4.270454406738281
1607206343.8138127	67	6.874359130859375
1607207829.6644025	68	6.8470587730407715
1607209307.5212805	69	7.6875
1607210784.1717815	70	6.059259414672852
1607212271.8957102	71	5.239999771118164
1607213755.2095473	72	6.4422221183776855
1607215226.285288	73	7.239999771118164
1607216701.9659426	74	5.120689868927002
1607218197.4746172	75	7.728000164031982
1607219685.435282	76	4.953845977783203
1607221158.993575	77	7.154545307159424
1607222643.4863071	78	5.5920000076293945
1607224119.6739404	79	6.77400016784668
1607225617.7739258	80	2.392307758331299
1607227127.8251047	81	7.179999828338623
1607228647.1884682	82	6.3913044929504395
1607230170.472652	83	3.270909070968628
1607231691.226623	84	9.46399974822998
1607233178.2803338	85	7.885365962982178
1607234660.1686215	86	9.176316261291504
1607236158.727923	87	4.8740739822387695
1607237639.0459838	88	6.981818199157715
1607239118.108053	89	10.165384292602539
1607240597.212738	90	4.979411602020264
1607242110.4367762	91	7.413636207580566
1607243620.7926369	92	10.569564819335938
1607245144.9282572	93	8.302083015441895
1607246677.0126677	94	7.40645170211792
1607248193.3623776	95	8.239130020141602
1607249697.1851974	96	-3.0428571701049805
1607251216.7558506	97	9.70199966430664
1607252693.035312	98	11.140816688537598
1607253980.009857	99	8.758695602416992
1607255103.9774725	100	5.75
