# Supplementary material
Source: ML conference proceedings conference paper supplement (https://proceedings.mlr.press/v139/rahman21a.html)
Supplement: Supplementary file 3 [file rahman21a-supp.zip › ICMLSupportingDoc 2/Visualization/OpenFortAttackRes/TRAIN/DGN/run-xhnyxflvwp-tag-Rewards_train_set.csv]

Wall time	Step	Value
1607099277.9643607	0	-3.7317073345184326
1607100976.6480124	1	-5.626829147338867
1607102642.7676978	2	-2.590322494506836
1607104309.7781243	3	-4.808108329772949
1607105972.039906	4	-9.5
1607107634.9954138	5	-6.912195205688477
1607109301.9391768	6	-5.911764621734619
1607110969.7117968	7	-2.01111102104187
1607112645.8063097	8	-4.400000095367432
1607114312.234669	9	-4.1456522941589355
1607115976.674051	10	-6.110526084899902
1607117642.4283044	11	-5.106249809265137
1607119314.263003	12	-5.124242305755615
1607121012.527782	13	-6.614634037017822
1607122731.6749506	14	-4.084444522857666
1607124429.4809146	15	-5.785999774932861
1607126048.2541132	16	-2.8394737243652344
1607127663.7505476	17	-4.135000228881836
1607129297.8085878	18	-5.053124904632568
1607130922.2704577	19	-3.2714285850524902
1607132562.7300646	20	-3.3181817531585693
1607134209.232974	21	-2.4066667556762695
1607135863.984101	22	-2.965454578399658
1607137506.2108514	23	-1.8538461923599243
1607139150.2929828	24	-2.888235330581665
1607140801.0818253	25	-3.7674999237060547
1607142430.8418918	26	-3.242424249649048
1607144072.8689601	27	-2.4604651927948
1607145723.1842968	28	-3.0687499046325684
1607147377.2039952	29	-2.8755555152893066
1607149050.2532248	30	-3.1500000953674316
1607150707.3133051	31	-1.1675676107406616
1607152398.3209774	32	-1.53125
1607154050.4464402	33	-4.979166507720947
1607155678.66782	34	-2.4439024925231934
1607157292.6981676	35	-1.929787278175354
1607158919.996384	36	-1.639285683631897
1607160547.621962	37	-4.52222204208374
1607162180.4314928	38	-2.9851064682006836
1607163804.4163415	39	-4.322916507720947
1607165432.7640064	40	-2.8629629611968994
1607167071.7784884	41	-2.754347801208496
1607168704.7254674	42	-3.3545453548431396
1607170269.153247	43	-0.13611111044883728
1607171793.7117817	44	2.9433963298797607
1607173295.1679406	45	-2.3710527420043945
1607174809.0920491	46	2.0480000972747803
1607176313.1785576	47	3.4000000953674316
1607177811.1059744	48	5.987500190734863
1607179320.9588535	49	4.275555610656738
1607180833.7072945	50	5.211904525756836
1607182352.995765	51	1.9372092485427856
1607183866.1853943	52	-4.930769443511963
1607185378.5371046	53	6.06315803527832
1607186875.3578205	54	-0.8399999737739563
1607188368.535076	55	6.189361572265625
1607189861.4852548	56	5.062963008880615
1607191362.3159535	57	4.6318182945251465
1607192848.7309856	58	6.1434783935546875
1607194290.373527	59	6.569387912750244
1607195730.5262845	60	2.1812500953674316
1607197203.6096232	61	0.3863636255264282
1607198669.5373702	62	6.597727298736572
1607200127.6473725	63	8.290244102478027
1607201570.8410757	64	1.1861110925674438
1607203024.8106337	65	3.746938705444336
1607204497.658989	66	7.056756973266602
1607205966.348942	67	2.674999952316284
1607207433.9841623	68	1.2536585330963135
1607208926.064775	69	3.9434783458709717
1607210405.760914	70	0.5244898200035095
1607211883.3959024	71	2.5638298988342285
1607213370.1074367	72	4.438709735870361
1607214849.5938072	73	5.860000133514404
1607216327.1049154	74	5.224137783050537
1607217799.025833	75	8.15217399597168
1607219271.8878644	76	7.906818389892578
1607220736.9669747	77	6.392000198364258
1607222192.7777705	78	4.260714054107666
1607223643.0391614	79	6.582499980926514
1607225116.9561088	80	1.6090909242630005
1607226612.1215696	81	6.478846073150635
1607228111.5970588	82	9.328888893127441
1607229615.169238	83	7.580769062042236
1607231121.0099308	84	10.030357360839844
1607232624.3180044	85	7.739534854888916
1607234102.7081535	86	9.583721160888672
1607235588.9689171	87	7.753703594207764
1607237075.5783179	88	10.288372039794922
1607238553.2104971	89	8.339130401611328
1607240015.4619803	90	7.778048992156982
1607241500.3043942	91	10.216279029846191
1607242982.6483262	92	3.7171428203582764
1607244494.2211132	93	8.184615135192871
1607246000.5299754	94	8.328205108642578
1607247505.7971692	95	5.415625095367432
1607249023.4631448	96	8.237931251525879
1607250519.1493604	97	8.079677600860596
1607250603.5643604	98	7.689677600860596
1607250834.7935820	99	7.989677600860596
1607251435.8943454	100	7.809677600860596
