# Supplementary material
Source: ML conference proceedings conference paper supplement (https://proceedings.mlr.press/v139/rahman21a.html)
Supplement: Supplementary file 3 [file rahman21a-supp.zip › ICMLSupportingDoc 2/Visualization/OpenFortAttackRes/TRAIN/DGN/run-xxaligvdjb-tag-Rewards_train_set.csv]

Wall time	Step	Value
1607099266.9770317	0	-6.922222137451172
1607100959.8393013	1	-5.028947353363037
1607102633.3343084	2	-7.410810947418213
1607104312.5059443	3	-5.887878894805908
1607105989.8639307	4	-4.845714092254639
1607107670.6598756	5	-5.504255294799805
1607109355.2344728	6	-6.308000087738037
1607111025.1945345	7	-5.525806427001953
1607112682.4482517	8	-3.747619152069092
1607114303.3654466	9	-6.146153926849365
1607115925.1159282	10	-6.244999885559082
1607117548.4624412	11	-4.5702128410339355
1607119178.5566373	12	-2.941666603088379
1607120822.6489005	13	-5.683333396911621
1607122479.3450353	14	-6.497436046600342
1607124133.5424075	15	-5.910810947418213
1607125755.5254576	16	-4.663157939910889
1607127373.7089622	17	-4.39722204208374
1607129012.356095	18	-2.9674999713897705
1607130643.721299	19	-3.617142915725708
1607132291.0486639	20	-5.042500019073486
1607133931.792819	21	-4.273333549499512
1607135578.9506733	22	-3.9418604373931885
1607137237.7547278	23	-2.811764717102051
1607138889.6804903	24	-3.2029411792755127
1607140557.7238207	25	-3.1883721351623535
1607142203.115308	26	-2.5615384578704834
1607143853.6808543	27	-3.471794843673706
1607145509.7133212	28	-1.993749976158142
1607147164.3131535	29	-3.021052598953247
1607148831.164994	30	-2.2428572177886963
1607150523.7799172	31	-3.954347848892212
1607152211.0543432	32	-2.434042453765869
1607153870.4046657	33	-6.942857265472412
1607155495.4061875	34	-3.506666660308838
1607157104.429879	35	0.3733333349227905
1607158722.1146235	36	-1.859375
1607160343.7097855	37	2.7933332920074463
1607161970.297021	38	-1.9444444179534912
1607163577.6798508	39	2.6361701488494873
1607165182.9404056	40	-1.534999966621399
1607166812.6895232	41	0.6326923370361328
1607168446.346706	42	-0.054054055362939835
1607170023.410114	43	2.204651117324829
1607171548.5024986	44	3.1578948497772217
1607173066.541192	45	-0.7590909004211426
1607174588.6179593	46	1.0777777433395386
1607176103.5308924	47	5.747727394104004
1607177621.566492	48	-0.6545454263687134
1607179158.3172212	49	5.711363792419434
1607180698.2061567	50	4.961702346801758
1607182226.510006	51	3.1403846740722656
1607183763.698751	52	7.923333168029785
1607185287.518603	53	5.318749904632568
1607186795.0071352	54	-0.1111111119389534
1607188298.7819319	55	6.630434989929199
1607189791.2757332	56	3.7870967388153076
1607191290.706589	57	1.712499976158142
1607192775.7801178	58	4.38378381729126
1607194247.974679	59	3.9612903594970703
1607195711.4495409	60	7.5333333015441895
1607197171.2946355	61	7.458695888519287
1607198638.6567273	62	8.273468971252441
1607200092.1243448	63	5.487878799438477
1607201540.0501373	64	9.525641441345215
1607202978.8214788	65	-2.3628571033477783
1607204440.7496347	66	8.926530838012695
1607205903.0919292	67	4.241025447845459
1607207362.2049732	68	8.7475004196167
1607208840.0553017	69	6.288888931274414
1607210318.5258548	70	8.354348182678223
1607211780.1470141	71	6.409523963928223
1607213251.3347247	72	6.806666851043701
1607214715.5168767	73	3.9772727489471436
1607216195.9905248	74	9.324999809265137
1607217685.2526855	75	9.75
1607219158.7694576	76	7.795454502105713
1607220614.762219	77	8.103571891784668
1607222078.2084363	78	7.869565010070801
1607223573.3322213	79	10.289583206176758
1607225050.8049595	80	4.442857265472412
1607226542.1572435	81	7.793103218078613
1607228043.8138933	82	4.181579113006592
1607229544.542051	83	8.944999694824219
1607231034.4583056	84	8.227499961853027
1607232524.493778	85	11.293333053588867
1607234006.550551	86	8.804255485534668
1607235504.3562434	87	8.759614944458008
1607236994.5980105	88	10.948837280273438
1607238474.3927634	89	5.980851173400879
1607239944.4089534	90	9.9530611038208
1607241432.1283002	91	12.176595687866211
1607242930.1482027	92	12.86296272277832
1607244421.0188267	93	9.760000228881836
1607245928.6267402	94	12.185454368591309
1607247448.2710617	95	12.276596069335938
1607248959.9451635	96	7.122448921203613
1607250461.1397455	97	12.781632423400879
1607251957.465659	98	12.856521606445312
1607253354.178876	99	13.556818008422852
1607254498.9520671	100	12.045238494873047
