# Supplementary material
Source: ML conference proceedings conference paper supplement (https://proceedings.mlr.press/v139/rahman21a.html)
Supplement: Supplementary file 3 [file rahman21a-supp.zip › ICMLSupportingDoc 2/Visualization/OpenFortAttackRes/TRAIN/DGN_Test/run-eccbjqemxa-tag-Rewards_eval.csv]

Wall time	Step	Value
1607099282.6993754	0	-7.97560977935791
1607100947.0572484	1	-6.710810661315918
1607102625.065556	2	-6.552174091339111
1607104296.9363408	3	-3.422499895095825
1607105968.0166547	4	-4.563636302947998
1607107647.5921006	5	-3.1488888263702393
1607109324.35733	6	-4.502173900604248
1607111011.3696861	7	-2.2853658199310303
1607112697.218048	8	-4.191176414489746
1607114383.8515892	9	-4.602222442626953
1607116081.9504774	10	-4.2442307472229
1607117791.6832435	11	-3.069047689437866
1607119436.1538248	12	-4.686110973358154
1607121066.5531065	13	-3.567307710647583
1607122695.4093993	14	-4.005405426025391
1607124319.1069517	15	-1.7685185670852661
1607125946.2211046	16	-3.8951220512390137
1607127594.394746	17	-5.007317066192627
1607129242.7183144	18	-2.883720874786377
1607130877.3907418	19	-4.395237922668457
1607132512.2560973	20	-1.1322580575942993
1607134133.8604057	21	-3.812195062637329
1607135761.317652	22	-4.665517330169678
1607137361.5388863	23	0.35483869910240173
1607138937.9745102	24	-3.6275861263275146
1607140524.343522	25	-2.161818265914917
1607142132.7446322	26	-6.127777576446533
1607143752.5980096	27	-3.055555582046509
1607145361.8767793	28	-2.706451654434204
1607146973.5527637	29	-1.4818181991577148
1607148569.1993225	30	-6.319047451019287
1607150138.5333917	31	-1.7666666507720947
1607151712.2206552	32	-2.5684211254119873
1607153290.2468464	33	-2.25
1607154875.726461	34	-1.746666669845581
1607156502.4304795	35	-2.972093105316162
1607158137.1251843	36	-1.9239130020141602
1607159767.2818685	37	-3.581481456756592
1607161386.8384016	38	-3.8550000190734863
1607163008.2702916	39	-4.874359130859375
1607164630.470531	40	-3.435483932495117
1607166244.1853578	41	-0.4033333361148834
1607167854.741869	42	2.2391304969787598
1607169442.8551996	43	-1.8178571462631226
1607170943.241746	44	-0.34324324131011963
1607172446.7385511	45	-0.6717391014099121
1607173946.3066797	46	-4.28000020980835
1607175454.1016865	47	1.4482758045196533
1607176953.1900883	48	2.927500009536743
1607178438.753089	49	6.7282609939575195
1607179899.6021268	50	0.8121951222419739
1607181393.409075	51	3.5405404567718506
1607182871.0046542	52	5.438636302947998
1607184339.6692255	53	4.729166507720947
1607185795.2790048	54	2.108823537826538
1607187265.161559	55	5.693749904632568
1607188752.846387	56	0.7666666507720947
1607190227.8314514	57	3.440476179122925
1607191706.47816	58	2.299999952316284
1607193208.6407514	59	3.5090909004211426
1607194694.614356	60	3.543181896209717
1607196180.5568995	61	4.458064556121826
1607197665.4205806	62	6.544186115264893
1607199153.3464265	63	9.390195846557617
1607200627.2530603	64	5.211999893188477
1607202122.2353947	65	4.024324417114258
1607203611.4811203	66	5.745098114013672
1607205097.6653993	67	-0.23863635957241058
1607206591.1541405	68	-2.0
1607208099.511185	69	2.465789556503296
1607209600.5055313	70	7.162962913513184
1607211098.4601722	71	6.356249809265137
1607212590.976814	72	12.506382942199707
1607214066.7155252	73	5.743333339691162
1607215539.7750788	74	9.992682456970215
1607216993.7524104	75	6.330769062042236
1607218441.079691	76	5.050000190734863
1607219915.7024026	77	8.96981143951416
1607221402.2856274	78	9.12407398223877
1607222883.253385	79	4.0
1607224365.269784	80	5.154761791229248
1607225854.025834	81	3.524444341659546
1607227329.37217	82	5.590000152587891
1607228792.0086997	83	6.490322589874268
1607230250.3398192	84	5.019512176513672
1607231718.28463	85	8.004166603088379
1607233185.4608343	86	9.783870697021484
1607234643.631631	87	6.941999912261963
1607236097.424806	88	9.402127265930176
1607237549.459359	89	4.680434703826904
1607239010.1689954	90	5.596774101257324
1607240465.388984	91	7.6032257080078125
1607241931.032075	92	7.771153926849365
1607243375.5725493	93	10.28723430633545
1607244820.4408824	94	8.784314155578613
1607246260.3231606	95	7.752777576446533
1607247685.2634656	96	5.178124904632568
1607249122.5500944	97	6.21875
1607250564.6164262	98	5.449999809265137
1607252012.029329	99	7.184615612030029
1607253357.8398445	100	7.400000095367432
