# Supplementary material
Source: ML conference proceedings conference paper supplement (https://proceedings.mlr.press/v139/rahman21a.html)
Supplement: Supplementary file 3 [file rahman21a-supp.zip › ICMLSupportingDoc 2/Visualization/OpenFortAttackRes/TRAIN/DGN_Test/run-jlgvzcuaci-tag-Rewards_eval.csv]

Wall time	Step	Value
1607099273.9519868	0	-6.75
1607100991.2677708	1	-3.825000047683716
1607102695.7841628	2	-5.800000190734863
1607104381.929872	3	-4.5333333015441895
1607106079.4379117	4	-2.0170211791992188
1607107774.693741	5	-3.0833332538604736
1607109435.0818324	6	-4.484444618225098
1607111064.8915608	7	-4.670000076293945
1607112705.136364	8	-5.715384483337402
1607114345.2441223	9	-2.7510204315185547
1607115976.4464705	10	-3.7515151500701904
1607117610.6077685	11	-5.4911112785339355
1607119262.2137861	12	-4.300000190734863
1607120928.8711877	13	-4.481578826904297
1607122583.206384	14	-2.3480000495910645
1607124247.5615141	15	-3.799999952316284
1607125879.222854	16	-3.3205127716064453
1607127518.6577268	17	-2.663829803466797
1607129144.370031	18	-2.8115384578704834
1607130765.3354704	19	-3.0630435943603516
1607132381.3611357	20	-2.3976190090179443
1607133986.3206813	21	-5.516279220581055
1607135588.9327688	22	-3.781818151473999
1607137210.3636892	23	-4.421739101409912
1607138830.6460426	24	-4.995555400848389
1607140412.7260687	25	-2.1710526943206787
1607142024.988921	26	-5.591428756713867
1607143647.2569447	27	-1.812195062637329
1607145249.571857	28	-1.7804347276687622
1607146872.4306903	29	-1.5720000267028809
1607148478.654876	30	-2.695744752883911
1607150157.394035	31	-3.172499895095825
1607151780.7400775	32	-2.7137930393218994
1607153401.5158908	33	-2.502631664276123
1607155014.4355602	34	-1.7690476179122925
1607156644.9436176	35	-0.3176470696926117
1607158284.66156	36	4.026666641235352
1607159896.288712	37	-1.3025641441345215
1607161494.2677276	38	-0.504878044128418
1607163078.277845	39	0.0062500000931322575
1607164673.0873573	40	1.2854167222976685
1607166250.2459362	41	-2.2829267978668213
1607167822.4832928	42	-2.200000047683716
1607169387.5342155	43	-2.565957546234131
1607170867.4426515	44	0.8374999761581421
1607172346.9334772	45	0.7333333492279053
1607173824.5913324	46	-2.3195652961730957
1607175291.5307672	47	-0.9622222185134888
1607176760.8860524	48	-0.7674418687820435
1607178241.018508	49	-2.5888888835906982
1607179704.1105347	50	-2.4454545974731445
1607181183.3080807	51	2.6909091472625732
1607182658.839426	52	4.58979606628418
1607184115.2170532	53	-1.65625
1607185569.573631	54	-0.08620689809322357
1607187026.967985	55	5.592592716217041
1607188483.0530112	56	-4.892857074737549
1607189967.5557315	57	-0.6658536791801453
1607191445.4063196	58	5.6310343742370605
1607192956.6174011	59	4.847457408905029
1607194460.8577034	60	3.883871078491211
1607195957.9613261	61	-3.605882406234741
1607197455.564275	62	3.0
1607198960.564427	63	4.9384613037109375
1607200468.5165117	64	4.828205108642578
1607201984.3916872	65	5.1980767250061035
1607203484.038818	66	6.675609588623047
1607204976.4838126	67	5.073585033416748
1607206454.8434696	68	9.274999618530273
1607207929.7007134	69	4.569387912750244
1607209403.1916988	70	3.8207547664642334
1607210886.4091358	71	8.325581550598145
1607212359.920393	72	3.8935484886169434
1607213847.0269794	73	8.264705657958984
1607215332.342063	74	8.309090614318848
1607216802.0753021	75	-2.575000047683716
1607218271.5667133	76	5.690625190734863
1607219762.5102239	77	6.060465335845947
1607221267.8845143	78	7.344117641448975
1607222764.108911	79	12.569999694824219
1607224237.9697857	80	0.7243902683258057
1607225699.2831395	81	7.462500095367432
1607227172.2240348	82	9.053333282470703
1607228631.5898795	83	7.903124809265137
1607230079.4909327	84	6.448648452758789
1607231517.4372556	85	9.686274528503418
1607232975.9155324	86	5.262499809265137
1607234455.2374175	87	11.84782600402832
1607235909.116946	88	7.612820625305176
1607237362.5488558	89	12.10200023651123
1607238834.2478771	90	9.656000137329102
1607240316.5720296	91	8.467924118041992
1607241765.4733121	92	11.006667137145996
1607243200.3743825	93	5.343181610107422
1607244621.8552501	94	10.432653427124023
1607246041.3067293	95	7.751219749450684
1607247437.5402043	96	8.054054260253906
1607248852.2052748	97	8.176922798156738
1607250278.6578336	98	6.885714054107666
1607251695.2447069	99	11.77755069732666
1607253062.164154	100	11.937037467956543
