# Supplementary material
Source: ML conference proceedings conference paper supplement (https://proceedings.mlr.press/v139/rahman21a.html)
Supplement: Supplementary file 3 [file rahman21a-supp.zip › ICMLSupportingDoc 2/Visualization/OpenFortAttackRes/TRAIN/DGN_Test/run-mhlkouvlhp-tag-Rewards_eval.csv]

Wall time	Step	Value
1607099273.1119545	0	-6.358974456787109
1607100950.3856902	1	-3.836585283279419
1607102647.8615644	2	-6.605555534362793
1607104362.1567059	3	-3.4594595432281494
1607106025.7781222	4	-4.748717784881592
1607107668.154224	5	-7.438709735870361
1607109314.3132272	6	-6.7171430587768555
1607110960.219131	7	-3.565624952316284
1607112615.2803364	8	-4.806976795196533
1607114253.0538576	9	-5.941999912261963
1607115891.3189611	10	-5.822727203369141
1607117526.5910347	11	-4.866666793823242
1607119157.0223815	12	-7.45945930480957
1607120781.1363797	13	-3.2688889503479004
1607122398.7105541	14	-7.191999912261963
1607124005.8847542	15	-4.237209320068359
1607125648.9949925	16	-7.680769443511963
1607127308.8188283	17	-4.7697672843933105
1607128956.1266434	18	-3.4257142543792725
1607130587.7983105	19	-4.278124809265137
1607132213.4994924	20	-4.017073154449463
1607133833.9954002	21	-6.684848308563232
1607135473.513642	22	-4.2531914710998535
1607137111.0674596	23	-2.5851852893829346
1607138720.6228693	24	-2.003448247909546
1607140328.4923408	25	-1.0
1607141937.497843	26	-3.527777671813965
1607143584.3292773	27	-3.3399999141693115
1607145199.6897323	28	-3.48888897895813
1607146818.4891148	29	-1.6234042644500732
1607148425.2241735	30	-2.160869598388672
1607150012.0221078	31	-1.5711538791656494
1607151626.3173401	32	1.7333333492279053
1607153224.9991038	33	-1.0166666507720947
1607154814.4322617	34	-5.747058868408203
1607156444.6911962	35	-1.2285714149475098
1607158081.3107402	36	0.824999988079071
1607159717.5439675	37	3.846874952316284
1607161352.4028418	38	-1.663636326789856
1607162973.162534	39	2.5470588207244873
1607164578.8455389	40	2.9883720874786377
1607166174.1052842	41	4.645454406738281
1607167767.174569	42	1.8595744371414185
1607169339.222477	43	3.1177778244018555
1607170862.947215	44	3.0999999046325684
1607172371.391172	45	3.49399995803833
1607173884.3831728	46	1.253333330154419
1607175395.0007575	47	0.12105263024568558
1607176892.8851967	48	3.119999885559082
1607178411.167154	49	5.895122051239014
1607179948.1711168	50	10.969388008117676
1607181468.6195543	51	2.5135135650634766
1607182980.4862158	52	3.094444513320923
1607184500.0037253	53	6.400000095367432
1607186005.1188064	54	7.545000076293945
1607187490.2608638	55	0.668181836605072
1607188979.0037258	56	5.543181896209717
1607190463.8919106	57	4.6954545974731445
1607191945.5976608	58	4.287499904632568
1607193388.8149111	59	8.439474105834961
1607194849.643538	60	6.239583492279053
1607196308.522775	61	2.1363637447357178
1607197768.9194288	62	7.763265132904053
1607199249.6975474	63	8.387755393981934
1607200735.6235874	64	7.753571510314941
1607202223.7071526	65	6.6259260177612305
1607203683.8836284	66	5.650000095367432
1607205146.7074661	67	6.764285564422607
1607206601.87125	68	4.721052646636963
1607208063.4366798	69	5.991666793823242
1607209516.3300931	70	0.106451615691185
1607210990.048564	71	3.758333444595337
1607212471.7045984	72	2.7026314735412598
1607213965.1397722	73	7.446000099182129
1607215453.784787	74	1.6833332777023315
1607216945.3284411	75	5.15925931930542
1607218400.4092944	76	6.199999809265137
1607219874.834871	77	5.915151596069336
1607221364.366389	78	7.005660533905029
1607222840.5952656	79	11.210908889770508
1607224312.5362537	80	11.138775825500488
1607225753.8747528	81	5.1901960372924805
1607227187.9649205	82	11.4399995803833
1607228614.0333197	83	8.125
1607230030.0961268	84	5.077777862548828
1607231463.0563724	85	4.726315975189209
1607232902.5581145	86	4.5
1607234360.3327694	87	8.436111450195312
1607235846.5166848	88	10.71500015258789
1607237318.0945592	89	5.5920000076293945
1607238796.3434799	90	3.1724138259887695
1607240254.0986803	91	8.276923179626465
1607241712.3723803	92	10.557777404785156
1607243177.8800328	93	8.425926208496094
1607244635.06052	94	6.776000022888184
1607246087.098176	95	9.18510627746582
1607247534.9375083	96	8.695555686950684
1607248987.2410626	97	12.922222137451172
1607250448.30489	98	12.131034851074219
1607251890.205003	99	4.687878608703613
1607253315.6288955	100	8.674138069152832
