# Supplementary material
Source: ML conference proceedings conference paper supplement (https://proceedings.mlr.press/v139/rahman21a.html)
Supplement: Supplementary file 3 [file rahman21a-supp.zip › ICMLSupportingDoc 2/Visualization/OpenFortAttackRes/TRAIN/DGN_Test/run-rqudscjlys-tag-Rewards_eval.csv]

Wall time	Step	Value
1607099216.126272	0	-6.278048992156982
1607100908.8619683	1	-4.823404312133789
1607102605.8110323	2	-4.235000133514404
1607104240.4846392	3	-6.849999904632568
1607105869.1751602	4	-2.278125047683716
1607107507.5312533	5	-3.7755556106567383
1607109143.235099	6	-5.158064365386963
1607110776.8276403	7	-2.5342857837677
1607112405.1086464	8	-4.995121955871582
1607114040.7734015	9	-0.6119047403335571
1607115667.823764	10	-4.746666431427002
1607117298.4384835	11	-3.7113635540008545
1607118922.8802953	12	-3.338709592819214
1607120538.3211272	13	-3.2527778148651123
1607122149.3665376	14	-5.223809719085693
1607123763.3896759	15	-2.894117593765259
1607125397.2427313	16	-6.1891303062438965
1607127040.4023685	17	-5.011627674102783
1607128696.842634	18	-1.6242424249649048
1607130357.9739182	19	-5.390909194946289
1607132009.5752132	20	-5.768965721130371
1607133664.3037114	21	-3.0808510780334473
1607135300.673145	22	-4.182142734527588
1607136920.5725148	23	-1.7999999523162842
1607138512.751835	24	-4.25454568862915
1607140100.8527782	25	-3.797142744064331
1607141699.5945408	26	-4.040816307067871
1607143321.8409486	27	-4.3606061935424805
1607144944.3376696	28	-5.939393997192383
1607146559.7130923	29	-4.604650974273682
1607148151.1679134	30	-3.4375
1607149762.0596833	31	-3.7444443702697754
1607151302.7756875	32	-2.682142972946167
1607152873.4720197	33	-2.7083332538604736
1607154462.8237464	34	-1.9454545974731445
1607156095.9593124	35	-3.5326530933380127
1607157732.6178856	36	-0.9729729890823364
1607159351.165878	37	-3.0199999809265137
1607160952.6288815	38	-4.162222385406494
1607162576.0285313	39	-3.681666612625122
1607164183.949617	40	0.09200000017881393
1607165772.8643706	41	-4.048717975616455
1607167371.2820747	42	0.1666666716337204
1607168969.3527076	43	-0.145454540848732
1607170483.387014	44	-6.75
1607171989.8392613	45	0.5105262994766235
1607173490.1722636	46	-3.4555554389953613
1607174993.5590158	47	-1.626086950302124
1607176499.366629	48	2.5363636016845703
1607178009.9993663	49	-0.5975000262260437
1607179495.115235	50	-2.7041666507720947
1607180974.154346	51	-6.504347801208496
1607182458.5547652	52	-1.4428571462631226
1607183940.7008617	53	-2.297872304916382
1607185418.3071399	54	1.9303029775619507
1607186904.1032276	55	7.188679218292236
1607188361.8991923	56	1.6342856884002686
1607189823.6530623	57	4.366000175476074
1607191276.220384	58	9.880702018737793
1607192751.2097034	59	5.678048610687256
1607194247.598519	60	4.440000057220459
1607195746.2967994	61	3.4392857551574707
1607197249.771495	62	3.0567567348480225
1607198758.807495	63	5.3781819343566895
1607200261.9241927	64	6.035849094390869
1607201763.4224448	65	6.71999979019165
1607203262.9245434	66	4.760784149169922
1607204770.539784	67	9.309259414672852
1607206261.636837	68	0.6489361524581909
1607207749.1053872	69	8.64222240447998
1607209220.4125705	70	6.877777576446533
1607210689.7216382	71	-1.1026315689086914
1607212152.1169162	72	4.215384483337402
1607213619.0019686	73	10.51395320892334
1607215092.4420311	74	5.51578950881958
1607216595.6790671	75	4.443902492523193
1607218099.3971698	76	8.656521797180176
1607219551.2226229	77	-0.3297872245311737
1607221026.1691136	78	10.289583206176758
1607222496.2481873	79	6.313207626342773
1607223977.4742787	80	6.852083206176758
1607225442.1236594	81	11.181249618530273
1607226871.5697658	82	8.385714530944824
1607228294.7647045	83	8.45714282989502
1607229732.6355522	84	6.099999904632568
1607231190.459482	85	6.156862735748291
1607232657.2006547	86	12.420929908752441
1607234103.0927165	87	10.131915092468262
1607235534.803776	88	13.122806549072266
1607236958.0127344	89	7.66304349899292
1607238392.9768748	90	9.86744213104248
1607239834.7558916	91	11.368292808532715
1607241277.8749027	92	9.753191947937012
1607242704.2117665	93	6.241666793823242
1607244135.9468071	94	1.621739149093628
1607245591.1592822	95	8.835593223571777
1607247029.3835552	96	9.036666870117188
1607248483.567459	97	8.147826194763184
1607249920.1645038	98	6.396078586578369
1607251343.8351872	99	10.613043785095215
1607252709.5859733	100	8.97115421295166
