# Supplementary material
Source: ML conference proceedings conference paper supplement (https://proceedings.mlr.press/v139/rahman21a.html)
Supplement: Supplementary file 3 [file rahman21a-supp.zip › ICMLSupportingDoc 2/Visualization/OpenFortAttackRes/TRAIN/DGN_Test/run-tmnwxmdfwv-tag-Rewards_eval.csv]

Wall time	Step	Value
1607099286.9483416	0	-5.216000080108643
1607100969.7371905	1	-4.240540504455566
1607102654.3241065	2	-3.6674418449401855
1607104323.7147481	3	-3.443333387374878
1607105987.2895539	4	-4.947368621826172
1607107672.4021685	5	-5.362162113189697
1607109364.5667343	6	-6.130000114440918
1607111056.3810527	7	-5.590697765350342
1607112742.6918855	8	-6.8810811042785645
1607114417.5097127	9	-6.053488254547119
1607116113.7939997	10	-2.549999952316284
1607117791.368409	11	-4.634285926818848
1607119467.797949	12	-4.2265305519104
1607121124.0850558	13	-7.423529624938965
1607122731.6458325	14	-4.742856979370117
1607124326.2444198	15	-3.048888921737671
1607125945.610143	16	-4.03000020980835
1607127580.9457357	17	-2.619999885559082
1607129204.7961245	18	-3.807142972946167
1607130822.307855	19	-3.133333444595337
1607132422.1479425	20	-4.136363506317139
1607134016.5764837	21	-1.0638889074325562
1607135619.3377533	22	-4.104545593261719
1607137242.4687357	23	-5.327777862548828
1607138856.3776002	24	-1.8102563619613647
1607140472.5610316	25	-3.6315789222717285
1607142085.849747	26	-3.1684210300445557
1607143701.211197	27	-4.612500190734863
1607145297.5638106	28	-3.864102602005005
1607146887.5068605	29	-2.263636350631714
1607148454.007264	30	-3.4944443702697754
1607150009.1699152	31	-2.970588207244873
1607151560.9565036	32	-2.174999952316284
1607153118.9158838	33	-3.563157796859741
1607154684.9992065	34	-3.5924999713897705
1607156307.595314	35	-3.84761905670166
1607157941.2032807	36	-3.690624952316284
1607159552.2121086	37	1.4431818723678589
1607161154.2550492	38	-3.075000047683716
1607162747.5207112	39	-0.8384615182876587
1607164324.200018	40	-2.952173948287964
1607165916.7194383	41	-0.7545454502105713
1607167498.3381307	42	-1.8481481075286865
1607169099.6825178	43	-0.9027777910232544
1607170595.487365	44	0.10227272659540176
1607172065.5920615	45	-1.0499999523162842
1607173547.9679444	46	2.8888888359069824
1607175017.9402103	47	6.336666584014893
1607176488.7909634	48	2.085294008255005
1607177956.1763585	49	1.3888888359069824
1607179409.2203202	50	-1.0304347276687622
1607180843.3914812	51	-1.8448275327682495
1607182302.5986288	52	4.585106372833252
1607183762.7410462	53	1.720588207244873
1607185218.6747022	54	7.970212936401367
1607186678.2564182	55	0.36666667461395264
1607188146.1832824	56	4.435294151306152
1607189620.7496517	57	5.320408344268799
1607191106.0294886	58	4.565714359283447
1607192603.9813259	59	4.990566253662109
1607194106.9639947	60	5.606818199157715
1607195607.6098936	61	6.210638523101807
1607197103.338163	62	2.950000047683716
1607198598.569169	63	5.416666507720947
1607200111.2097237	64	10.213043212890625
1607201617.1772227	65	8.865385055541992
1607203124.0186627	66	7.740816116333008
1607204604.3618326	67	7.502563953399658
1607206084.167999	68	6.619999885559082
1607207568.5263562	69	7.92553186416626
1607209054.650708	70	2.439393997192383
1607210541.999247	71	5.8681817054748535
1607212037.2846253	72	6.648148059844971
1607213528.6855032	73	8.261702537536621
1607215027.5556228	74	5.205555438995361
1607216527.5264544	75	7.757777690887451
1607218028.4264367	76	4.352830410003662
1607219511.2499015	77	4.564705848693848
1607220968.4872894	78	12.210204124450684
1607222438.527056	79	6.25
1607223913.6637561	80	7.751282215118408
1607225385.8678484	81	0.7434782385826111
1607226879.9591508	82	5.70263147354126
1607228385.7916913	83	4.313889026641846
1607229902.0757995	84	8.571929931640625
1607231402.2191176	85	5.00600004196167
1607232892.264695	86	5.54736852645874
1607234380.8484843	87	11.108333587646484
1607235861.841694	88	-2.5875000953674316
1607237356.5234737	89	9.29800033569336
1607238830.6990576	90	5.536841869354248
1607240305.3480046	91	7.039583206176758
1607241803.826999	92	12.05384635925293
1607243303.0426874	93	4.80476188659668
1607244831.2132363	94	9.94347858428955
1607246352.7012475	95	9.223076820373535
1607247876.7101934	96	7.370212554931641
1607249395.486235	97	5.486363410949707
1607250909.2731683	98	10.15384578704834
1607252396.9816332	99	5.84509801864624
1607253736.0672984	100	5.620408058166504
