# Supplementary material
Source: ML conference proceedings conference paper supplement (https://proceedings.mlr.press/v139/rahman21a.html)
Supplement: Supplementary file 3 [file rahman21a-supp.zip › ICMLSupportingDoc 2/Visualization/OpenFortAttackRes/TRAIN/DGN_Test/run-ulcpziomis-tag-Rewards_eval.csv]

Wall time	Step	Value
1607099288.6203928	0	-4.766666889190674
1607100999.708073	1	-3.75
1607102659.0223162	2	-5.7419352531433105
1607104315.5863755	3	-5.136111259460449
1607105974.1148832	4	-3.132652997970581
1607107632.3701854	5	-3.486666679382324
1607109287.8725991	6	-8.480645179748535
1607110943.9400945	7	-3.799999952316284
1607112619.2728114	8	-4.8575758934021
1607114287.412229	9	-4.400000095367432
1607115915.1544907	10	-4.903703689575195
1607117530.411485	11	-4.818749904632568
1607119159.2413275	12	-2.5366666316986084
1607120792.5852005	13	-2.6935484409332275
1607122452.8087332	14	-4.126923084259033
1607124117.2674956	15	-4.081395149230957
1607125751.8923593	16	-4.192307472229004
1607127372.2228818	17	-4.5
1607129006.7291293	18	-5.526829242706299
1607130632.6657524	19	-3.882857084274292
1607132268.6926196	20	-3.4000000953674316
1607133927.4723659	21	-2.590322494506836
1607135587.818372	22	-3.3638298511505127
1607137236.9555025	23	-3.944444417953491
1607138885.267665	24	-1.9305555820465088
1607140541.8470712	25	-3.6973683834075928
1607142193.68241	26	0.07111111283302307
1607143835.3333645	27	-0.7512820363044739
1607145480.6762815	28	-4.573809623718262
1607147130.9182527	29	-4.891176700592041
1607148783.5423706	30	-4.897058963775635
1607150479.3784306	31	0.20416666567325592
1607152172.9421985	32	-4.149019718170166
1607153839.3769808	33	-3.522580623626709
1607155487.587215	34	-1.5299999713897705
1607157121.6045036	35	-1.0433332920074463
1607158758.344323	36	-2.991891860961914
1607160388.780318	37	-2.4162790775299072
1607162027.576755	38	-0.25999999046325684
1607163655.1526687	39	0.15416666865348816
1607165283.159624	40	-0.17499999701976776
1607166921.9351997	41	-1.359459400177002
1607168564.125994	42	2.8061225414276123
1607170141.0078638	43	-2.452500104904175
1607171668.0209916	44	-0.8787878751754761
1607173206.76628	45	1.191304326057434
1607174738.61502	46	-0.25999999046325684
1607176283.946693	47	0.07000000029802322
1607177827.2621021	48	2.0630435943603516
1607179378.1579356	49	4.857142925262451
1607180929.4950297	50	-0.2884615361690521
1607182477.2620535	51	0.7309523820877075
1607184019.0288968	52	3.034482717514038
1607185542.4665513	53	1.784000039100647
1607187057.5167196	54	-0.019512195140123367
1607188560.7367544	55	2.4972972869873047
1607190069.1790571	56	4.057142734527588
1607191592.3925805	57	2.643137216567993
1607193066.1248612	58	7.4041666984558105
1607194549.2001677	59	4.618867874145508
1607196028.7449412	60	3.670212745666504
1607197512.1837296	61	2.748148202896118
1607198995.4261975	62	4.144827365875244
1607200480.2637753	63	2.7795917987823486
1607201935.8704364	64	4.38048791885376
1607203392.1989884	65	-3.3111112117767334
1607204868.8506122	66	4.710000038146973
1607206361.9494047	67	5.574999809265137
1607207842.1571784	68	2.519047737121582
1607209316.0661092	69	7.6541666984558105
1607210799.4242754	70	7.171794891357422
1607212284.7673223	71	3.305405378341675
1607213766.2218964	72	6.884375095367432
1607215239.8571758	73	3.9000000953674316
1607216707.5230474	74	-2.1777777671813965
1607218216.3297472	75	7.813725471496582
1607219698.3106165	76	0.47857141494750977
1607221170.3289013	77	5.391176700592041
1607222659.2511358	78	5.924489974975586
1607224135.7604458	79	6.043478488922119
1607225631.1118007	80	-0.22380952537059784
1607227146.708519	81	6.186274528503418
1607228667.2743378	82	5.339622497558594
1607230187.6154625	83	4.868000030517578
1607231704.616558	84	4.0411763191223145
1607233191.243619	85	5.736111164093018
1607234675.2035975	86	10.709755897521973
1607236170.1606326	87	4.3947367668151855
1607237656.0041187	88	7.743137359619141
1607239124.4359148	89	-0.8666666746139526
1607240610.0228045	90	6.202777862548828
1607242122.9001966	91	4.9666666984558105
1607243637.281968	92	10.300000190734863
1607245161.7901874	93	8.512245178222656
1607246686.759745	94	4.816129207611084
1607248208.212726	95	7.1447367668151855
1607249712.823177	96	8.015000343322754
1607251235.4187214	97	10.312000274658203
1607252708.0561984	98	9.980487823486328
1607253994.492755	99	10.618867874145508
1607255111.8429322	100	4.234285831451416
