# Supplementary material
Source: ML conference proceedings conference paper supplement (https://proceedings.mlr.press/v139/rahman21a.html)
Supplement: Supplementary file 3 [file rahman21a-supp.zip › ICMLSupportingDoc 2/Visualization/OpenFortAttackRes/TRAIN/DGN_Test/run-xhnyxflvwp-tag-Rewards_eval.csv]

Wall time	Step	Value
1607099292.2971947	0	-5.179487228393555
1607100988.7636442	1	-5.955882549285889
1607102655.8779488	2	-6.8681817054748535
1607104322.6747408	3	-3.7026314735412598
1607105983.61649	4	-7.908823490142822
1607107644.3856757	5	-3.6629629135131836
1607109315.6577163	6	-4.204761981964111
1607110979.47109	7	-6.621212005615234
1607112657.8078394	8	-4.931579113006592
1607114321.9511232	9	-3.4882352352142334
1607115990.2161477	10	-2.2666666507720947
1607117657.3178053	11	-5.054347991943359
1607119328.1769328	12	-4.502380847930908
1607121028.0423238	13	-3.351219415664673
1607122748.0633879	14	-2.6363637447357178
1607124443.4975038	15	-4.636170387268066
1607126063.493363	16	-4.023404121398926
1607127680.087217	17	-1.9459999799728394
1607129309.7914448	18	-3.8657894134521484
1607130935.90595	19	-3.2279069423675537
1607132574.746675	20	-5.55384635925293
1607134222.9001358	21	-2.843181848526001
1607135873.9492776	22	-3.174999952316284
1607137515.5062046	23	-2.3440001010894775
1607139164.371635	24	-2.2750000953674316
1607140814.3152618	25	-0.9205882549285889
1607142446.39618	26	-1.9019999504089355
1607144086.922764	27	-3.69189190864563
1607145737.3654861	28	-0.9800000190734863
1607147393.8060615	29	-2.647916555404663
1607149063.6665483	30	-0.9457142949104309
1607150724.00211	31	-2.418367385864258
1607152405.7157025	32	-6.706250190734863
1607154068.7020805	33	-2.44901967048645
1607155691.9509764	34	-2.1380951404571533
1607157308.133253	35	-3.425490140914917
1607158933.2131956	36	-2.8615384101867676
1607160560.8163662	37	-2.615384578704834
1607162195.0220368	38	0.47631579637527466
1607163818.894033	39	-2.957446813583374
1607165446.1949368	40	-0.6552631855010986
1607167086.8028066	41	-0.5099999904632568
1607168719.1877153	42	-1.4199999570846558
1607170282.7695012	43	-3.4048781394958496
1607171804.957943	44	-1.8468749523162842
1607173311.3216212	45	-1.6224489212036133
1607174819.5158782	46	0.11428571492433548
1607176329.9913638	47	2.502000093460083
1607177825.5452585	48	2.6351351737976074
1607179334.4652073	49	3.1305556297302246
1607180852.9825926	50	5.641666889190674
1607182364.621575	51	2.4781250953674316
1607183880.3844385	52	3.1903226375579834
1607185396.5964577	53	7.106666564941406
1607186891.2773957	54	2.4558138847351074
1607188385.5252264	55	4.041999816894531
1607189876.5893779	56	2.7382352352142334
1607191380.5366497	57	5.304255485534668
1607192862.27506	58	2.22352933883667
1607194299.964614	59	5.851851940155029
1607195747.4216404	60	3.068085193634033
1607197215.8442502	61	1.0459460020065308
1607198687.9118497	62	3.8490567207336426
1607200150.3502853	63	9.021666526794434
1607201584.8081152	64	3.729729652404785
1607203043.6309736	65	5.640425682067871
1607204512.3782814	66	9.539999961853027
1607205977.4356678	67	6.633333206176758
1607207451.3867195	68	2.4347825050354004
1607208940.36045	69	4.521212100982666
1607210420.0435855	70	-0.5046511888504028
1607211898.4820127	71	3.3291666507720947
1607213388.7196941	72	5.582353115081787
1607214868.0556607	73	5.665306091308594
1607216339.7548783	74	5.061764717102051
1607217815.5648232	75	8.970454216003418
1607219283.8928685	76	4.636363506317139
1607220748.182351	77	6.910714149475098
1607222211.717685	78	5.974999904632568
1607223657.6788902	79	7.109755992889404
1607225133.3681736	80	8.225581169128418
1607226625.403377	81	5.059374809265137
1607228128.4900877	82	6.106249809265137
1607229636.3769293	83	9.527999877929688
1607231139.4530375	84	8.73265266418457
1607232640.2965784	85	12.302438735961914
1607234116.8127298	86	6.145454406738281
1607235603.5733957	87	9.73658561706543
1607237095.346073	88	10.706000328063965
1607238565.5314207	89	7.723076820373535
1607240032.749404	90	9.797916412353516
1607241514.7581167	91	9.380000114440918
1607243003.8522632	92	6.3240742683410645
1607244510.13752	93	7.0333333015441895
1607246017.6523082	94	8.897727012634277
1607247523.5784776	95	6.279592037200928
1607249029.4930098	96	-2.5199999809265137
1607250539.841518	97	10.429411888122559
