# Supplementary material
Source: ML conference proceedings conference paper supplement (https://proceedings.mlr.press/v139/rahman21a.html)
Supplement: Supplementary file 3 [file rahman21a-supp.zip › ICMLSupportingDoc 2/Visualization/OpenFortAttackRes/TRAIN/DGN_Test/run-xxaligvdjb-tag-Rewards_eval.csv]

Wall time	Step	Value
1607099277.436242	0	-8.350000381469727
1607100971.3766105	1	-5.303030490875244
1607102645.263972	2	-5.835484027862549
1607104327.760639	3	-4.893181800842285
1607105999.341656	4	-4.063333511352539
1607107686.6613877	5	-4.838775634765625
1607109366.9516237	6	-6.188889026641846
1607111036.1185782	7	-5.296666622161865
1607112695.8442743	8	-1.475000023841858
1607114314.2611117	9	-5.342857360839844
1607115938.3106108	10	-4.420454502105713
1607117559.1797643	11	-3.2742857933044434
1607119189.1448417	12	-3.3096773624420166
1607120833.3145258	13	-6.44523811340332
1607122490.6351383	14	-5.961538314819336
1607124143.0367098	15	-3.7166666984558105
1607125765.7264605	16	-5.696774005889893
1607127387.091143	17	-2.3880951404571533
1607129023.4558449	18	-3.6789474487304688
1607130655.6570075	19	-2.3342106342315674
1607132305.1021655	20	-3.3088889122009277
1607133942.9783306	21	-4.305714130401611
1607135590.8942456	22	-3.7030303478240967
1607137249.5717378	23	-3.1470587253570557
1607138902.8382561	24	-1.878947377204895
1607140567.7070413	25	-4.741666793823242
1607142218.522815	26	-4.313636302947998
1607143867.3186839	27	-2.8744184970855713
1607145519.690347	28	-3.306666612625122
1607147181.5249379	29	-2.031818151473999
1607148846.0627282	30	-1.452380895614624
1607150539.6856034	31	-3.45306134223938
1607152226.9493287	32	-2.7339999675750732
1607153883.9441297	33	-2.924999952316284
1607155506.5626295	34	-4.908571243286133
1607157123.0056756	35	1.8450980186462402
1607158739.3854558	36	-1.0
1607160360.3403091	37	1.6666666269302368
1607161982.691144	38	-0.5564102530479431
1607163592.0239773	39	0.862162172794342
1607165200.2611985	40	1.0104166269302368
1607166831.3478339	41	2.0630435943603516
1607168463.2006423	42	0.5666666626930237
1607170041.6778007	43	1.9094339609146118
1607171559.1720552	44	1.2766666412353516
1607173083.4528744	45	4.975555419921875
1607174606.8675482	46	3.647169828414917
1607176116.4398303	47	1.107894778251648
1607177634.8556368	48	0.8399999737739563
1607179174.0572476	49	4.4170732498168945
1607180710.8443995	50	4.775000095367432
1607182241.8152177	51	3.9738094806671143
1607183782.0333967	52	7.774509906768799
1607185300.9224055	53	4.942857265472412
1607186808.8288484	54	1.0906976461410522
1607188312.346875	55	6.842857360839844
1607189806.8017356	56	2.8842105865478516
1607191307.4118903	57	4.936956405639648
1607192793.9540086	58	4.692592620849609
1607194261.1814454	59	4.769230842590332
1607195726.1658711	60	5.770270347595215
1607197188.9342563	61	7.919565200805664
1607198651.3521085	62	5.925714492797852
1607200109.2227275	63	6.958695888519287
1607201552.2816582	64	5.307499885559082
1607202987.3581839	65	0.29032257199287415
1607204452.7105582	66	5.6314287185668945
1607205911.0082898	67	5.352380752563477
1607207374.8704648	68	5.023529529571533
1607208852.661354	69	5.014705657958984
1607210330.3890653	70	7.027585983276367
1607211786.2025042	71	-2.1636364459991455
1607213264.4990308	72	6.22777795791626
1607214727.616896	73	5.993939399719238
1607216209.8146281	74	4.774358749389648
1607217698.3472877	75	5.81944465637207
1607219168.3976073	76	4.55483865737915
1607220629.2039154	77	4.751163005828857
1607222094.7924936	78	5.159183502197266
1607223588.998905	79	9.377272605895996
1607225061.5862248	80	7.24545431137085
1607226555.9543283	81	4.348648548126221
1607228058.7052686	82	6.061764717102051
1607229559.5623207	83	7.102702617645264
1607231046.7337167	84	3.581818103790283
1607232537.9916906	85	9.926470756530762
1607234022.3847988	86	8.768292427062988
1607235516.3276153	87	7.9259257316589355
1607237007.6803546	88	9.771428108215332
1607238486.0265367	89	8.069999694824219
1607239962.370267	90	12.108510971069336
1607241448.7296016	91	10.565217018127441
1607242947.5174868	92	7.708510875701904
1607244436.726904	93	13.418181419372559
1607245946.0975447	94	12.758695602416992
1607247462.2818139	95	8.842424392700195
1607248977.040858	96	12.573333740234375
1607250475.2553172	97	12.771875381469727
1607251963.0588245	98	-2.066666603088379
1607253364.0522134	99	10.802778244018555
1607254509.7989297	100	8.841025352478027
