# Supplementary material
Source: ML conference proceedings conference paper supplement (https://proceedings.mlr.press/v139/rahman21a.html)
Supplement: Supplementary file 3 [file rahman21a-supp.zip › ICMLSupportingDoc 2/Visualization/OpenFortAttackRes/TRAIN/GNN/run-annltlptcl-tag-Rewards_train_set.csv]

Wall time	Step	Value
1603603929.3605807	0	-6.789473533630371
1603605652.786588	1	-7.036841869354248
1603607376.6969552	2	-8.830434799194336
1603609114.4584496	3	-8.033333778381348
1603610861.920476	4	-5.205882549285889
1603612590.4623272	5	-7.5333333015441895
1603614312.199262	6	-5.813953399658203
1603616039.5663445	7	-4.902702808380127
1603617796.56984	8	-3.265000104904175
1603619554.3216	9	-2.9432432651519775
1603621306.6671546	10	-3.257499933242798
1603623052.8965313	11	-3.713157892227173
1603624805.3556046	12	-3.6297872066497803
1603626561.2169147	13	-5.105128288269043
1603628312.484497	14	-2.7941176891326904
1603630065.970347	15	-2.043243169784546
1603631806.6791837	16	-4.019999980926514
1603633549.7685194	17	-2.2090909481048584
1603635292.0070357	18	-3.344444513320923
1603637014.821693	19	-5.358333110809326
1603638750.313805	20	-1.024999976158142
1603640467.9740806	21	0.6079999804496765
1603642204.1451125	22	0.27547168731689453
1603643932.983726	23	0.48750001192092896
1603645662.8590908	24	-1.640540599822998
1603647389.7361794	25	1.4341462850570679
1603649108.1496835	26	3.2224490642547607
1603650824.4341278	27	-2.1744186878204346
1603652544.612565	28	-0.7020833492279053
1603654252.9229937	29	0.49210527539253235
1603655980.4764144	30	6.709523677825928
1603657702.0180101	31	3.1222221851348877
1603659415.3474214	32	8.358333587646484
1603661133.3451674	33	3.4666666984558105
1603662850.7796657	34	8.162500381469727
1603664559.7140698	35	8.545098304748535
1603666243.7049365	36	1.600000023841858
1603667942.0850687	37	4.237931251525879
1603669629.5576036	38	4.512195110321045
1603671316.30454	39	7.283871173858643
1603672992.7962604	40	6.391666889190674
1603674657.510134	41	9.326530456542969
1603676316.9181342	42	6.985714435577393
1603677992.5166845	43	5.6539998054504395
1603679650.9490585	44	9.54230785369873
1603681287.4506342	45	7.543137073516846
1603682931.4666154	46	6.563889026641846
1603684547.0024347	47	12.206250190734863
1603686195.020435	48	6.724999904632568
1603687817.2304156	49	7.369697093963623
1603689433.9884996	50	10.456250190734863
1603691041.0649312	51	14.093181610107422
1603692685.5065901	52	5.551515102386475
1603694310.279782	53	12.571739196777344
1603695935.2524345	54	7.035555362701416
1603697561.0123422	55	9.350000381469727
1603699203.8210206	56	13.764444351196289
1603700864.8494053	57	9.53396224975586
1603702502.6058095	58	11.668000221252441
1603704143.4286835	59	7.478048801422119
1603705785.2942662	60	9.409677505493164
1603707418.230353	61	13.621622085571289
1603709065.6837726	62	14.204444885253906
1603710714.5659277	63	15.830357551574707
1603712357.1890528	64	11.84782600402832
1603713994.505049	65	15.018965721130371
1603715630.7788877	66	15.954545021057129
1603717202.0940278	67	8.795744895935059
1603718731.5897748	68	14.329545021057129
1603720320.4008768	69	16.145238876342773
1603721927.1001513	70	13.654166221618652
1603723540.026502	71	12.445833206176758
1603725151.581816	72	13.184782981872559
1603726769.4815621	73	15.04285717010498
1603728377.868741	74	9.971697807312012
1603729979.4880018	75	15.662790298461914
1603731593.4169645	76	15.733333587646484
1603733208.0947149	77	15.776190757751465
1603734816.989453	78	11.6899995803833
1603736440.84783	79	13.579999923706055
1603738036.51013	80	11.061538696289062
1603739650.6338882	81	17.558929443359375
1603741251.839909	82	7.889655113220215
1603742861.9899466	83	11.854545593261719
1603744472.5440226	84	15.02765941619873
1603745994.0240252	85	17.625
1603747554.103584	86	17.42727279663086
1603749097.9599457	87	13.534883499145508
1603750620.681254	88	17.452543258666992
1603752156.6534083	89	15.043859481811523
1603753676.794876	90	9.387804985046387
1603755190.049088	91	13.465789794921875
1603756704.0618823	92	14.412195205688477
1603758230.6393423	93	9.030769348144531
1603759777.7704878	94	15.258928298950195
1603761397.9340873	95	14.092000007629395
1603762962.0016074	96	0.3499999940395355
1603764516.4636889	97	12.951851844787598
1603766083.9419146	98	18.311111450195312
1603767601.7373421	99	16.56304359436035
1603769134.588839	100	19.80363655090332
