# Supplementary material
Source: ML conference proceedings conference paper supplement (https://proceedings.mlr.press/v139/rahman21a.html)
Supplement: Supplementary file 3 [file rahman21a-supp.zip › ICMLSupportingDoc 2/Visualization/OpenFortAttackRes/TRAIN/GNN/run-baowkcwvgy-tag-Rewards_train_set.csv]

Wall time	Step	Value
1603603924.0878587	0	-8.600000381469727
1603605648.7362695	1	-6.009375095367432
1603607386.435282	2	-7.42307710647583
1603609131.1676965	3	-6.480952262878418
1603610875.9703343	4	-6.788372039794922
1603612596.273477	5	-6.550000190734863
1603614319.3755767	6	-4.021951198577881
1603616052.0995157	7	-7.287179470062256
1603617811.7521327	8	-3.51111102104187
1603619575.9428673	9	-3.6156861782073975
1603621327.2999008	10	-5.3575758934021
1603623087.0820131	11	-4.748888969421387
1603624849.2728553	12	-3.4980392456054688
1603626606.382286	13	-4.489743709564209
1603628379.0955548	14	-4.622727394104004
1603630131.499662	15	-3.1075000762939453
1603631883.9257042	16	-4.761702060699463
1603633637.2194607	17	-4.722727298736572
1603635392.7064822	18	-4.626470565795898
1603637143.1618814	19	-4.258333206176758
1603638889.6266046	20	-4.136363506317139
1603640646.2083416	21	-3.5941176414489746
1603642400.0064952	22	-4.3684210777282715
1603644152.712753	23	-3.077500104904175
1603645906.4298742	24	-2.9677419662475586
1603647647.9182928	25	-2.7645161151885986
1603649396.3787968	26	-1.4129629135131836
1603651138.0323014	27	0.6538461446762085
1603652873.680425	28	-2.429032325744629
1603654621.8474796	29	-0.7465116381645203
1603656362.0617537	30	0.6803921461105347
1603658088.1939023	31	4.952381134033203
1603659825.7854002	32	-0.32380953431129456
1603661537.4582713	33	0.1944444477558136
1603663260.2410204	34	0.33125001192092896
1603664974.9614735	35	1.2742856740951538
1603666688.5880084	36	2.443589687347412
1603668407.8142786	37	4.7326531410217285
1603670103.3520088	38	1.9448275566101074
1603671821.3311217	39	6.406976699829102
1603673516.4268277	40	4.277777671813965
1603675203.949623	41	8.497872352600098
1603676885.5122485	42	13.120408058166504
1603678576.5528681	43	9.959183692932129
1603680249.5917525	44	8.05227279663086
1603681907.7696116	45	6.5239129066467285
1603683540.691271	46	11.01956558227539
1603685188.202566	47	9.600000381469727
1603686836.660913	48	3.98974347114563
1603688465.9295309	49	8.762222290039062
1603690093.3110712	50	12.145097732543945
1603691726.233295	51	11.611363410949707
1603693363.2204874	52	15.008000373840332
1603695005.901854	53	12.375862121582031
1603696627.4874942	54	3.1644444465637207
1603698273.8670394	55	14.71276569366455
1603699927.1462977	56	17.559524536132812
1603701578.838461	57	14.350000381469727
1603703225.941772	58	12.102325439453125
1603704862.980257	59	10.610203742980957
1603706488.4425118	60	1.4600000381469727
1603708130.076111	61	14.149123191833496
1603709772.4467387	62	9.720588684082031
1603711415.218947	63	15.436956405639648
1603713066.0100486	64	10.45714282989502
1603714720.320677	65	14.631817817687988
1603716360.827081	66	6.439473628997803
1603717852.2462523	67	8.174074172973633
1603719419.4640553	68	17.454761505126953
1603721023.9261756	69	10.862069129943848
1603722655.1050816	70	14.394915580749512
1603724265.1056635	71	15.833333015441895
1603725883.1666548	72	9.448780059814453
1603727489.0307412	73	14.244000434875488
1603729117.3034863	74	7.315000057220459
1603730730.5685906	75	13.784090995788574
1603732359.7163167	76	15.350000381469727
1603733992.3473234	77	11.699999809265137
1603735601.991987	78	13.082608222961426
1603737223.1869028	79	8.125
1603738839.9478533	80	16.954545974731445
1603740452.4124672	81	13.529411315917969
1603742077.2096343	82	16.191110610961914
1603743688.8550396	83	15.0
1603745251.0470717	84	12.848276138305664
1603746789.3961132	85	20.56551742553711
1603748353.2503185	86	15.106249809265137
1603749861.5048473	87	13.508108139038086
1603751398.187818	88	13.711764335632324
1603752910.7446604	89	19.35357093811035
1603754421.1617131	90	13.195348739624023
1603755931.57746	91	15.731111526489258
1603757454.1965456	92	17.280851364135742
1603758989.5779119	93	13.102325439453125
1603760592.173496	94	9.595349311828613
1603762204.657793	95	15.727272987365723
1603763786.4140599	96	16.004348754882812
1603765356.1882637	97	14.029787063598633
1603766918.228228	98	12.22449016571045
1603768444.002934	99	18.006778717041016
1603769864.7817814	100	15.757447242736816
