# Supplementary material
Source: ML conference proceedings conference paper supplement (https://proceedings.mlr.press/v139/rahman21a.html)
Supplement: Supplementary file 3 [file rahman21a-supp.zip › ICMLSupportingDoc 2/Visualization/OpenFortAttackRes/TRAIN/GNN/run-ccngnbeaox-tag-Rewards_train_set.csv]

Wall time	Step	Value
1603603926.6950955	0	-4.482758522033691
1603605659.0524204	1	-7.256410121917725
1603607423.4754448	2	-6.0239129066467285
1603609175.0466201	3	-6.5604166984558105
1603610933.6318195	4	-6.567441940307617
1603612662.3676333	5	-8.645237922668457
1603614392.760901	6	-7.02142858505249
1603616125.4301867	7	-5.0789475440979
1603617895.671297	8	-9.149999618530273
1603619648.3028758	9	-8.454545021057129
1603621417.1277907	10	-5.709523677825928
1603623178.0054414	11	-2.992682933807373
1603624948.8062322	12	-2.21875
1603626712.4981427	13	-2.9749999046325684
1603628476.2246974	14	-3.545454502105713
1603630238.2646637	15	-4.803921699523926
1603631991.4885798	16	-4.171929836273193
1603633744.4578855	17	-3.61388897895813
1603635490.7830873	18	-4.607142925262451
1603637237.5517833	19	-4.858333110809326
1603639004.6089692	20	-3.1842105388641357
1603640755.7268214	21	-4.118750095367432
1603642512.1163855	22	-2.484375
1603644267.0982752	23	0.6642857193946838
1603646009.5560153	24	-2.434999942779541
1603647753.287364	25	-2.4000000953674316
1603649493.8460667	26	-2.7853658199310303
1603651233.5301464	27	-0.13333334028720856
1603652966.9093585	28	-0.7310344576835632
1603654706.9727802	29	-0.7049999833106995
1603656444.1243143	30	0.6600000262260437
1603658180.9043543	31	-0.9833333492279053
1603659913.0701568	32	-0.535897433757782
1603661651.1209414	33	1.0976743698120117
1603663379.5274818	34	0.09799999743700027
1603665098.6367195	35	1.6285713911056519
1603666823.5167716	36	6.3510637283325195
1603668545.8857358	37	3.3148937225341797
1603670284.1279075	38	5.371110916137695
1603672015.5935597	39	2.310638189315796
1603673749.620663	40	3.7282607555389404
1603675461.8210104	41	5.121428489685059
1603677181.3167088	42	7.498245716094971
1603678905.1551719	43	3.3687500953674316
1603680592.244941	44	8.740476608276367
1603682279.7311385	45	7.073913097381592
1603683957.852491	46	8.600000381469727
1603685645.9678473	47	8.34000015258789
1603687331.2080615	48	10.513461112976074
1603688998.7481155	49	-2.692307710647583
1603690658.452629	50	5.205882549285889
1603692339.9857597	51	11.964285850524902
1603694000.800718	52	8.155814170837402
1603695675.915745	53	13.951064109802246
1603697318.228309	54	5.616666793823242
1603698992.3359568	55	10.175862312316895
1603700668.0362995	56	7.635593414306641
1603702326.0914156	57	9.823077201843262
1603703988.3656502	58	11.265517234802246
1603705657.1958833	59	11.00851058959961
1603707306.2376685	60	6.848275661468506
1603708966.237562	61	10.571110725402832
1603710613.7037735	62	10.937931060791016
1603712270.3987837	63	12.449999809265137
1603713931.1372726	64	10.826666831970215
1603715580.3230934	65	6.1777777671813965
1603717153.121203	66	10.51111125946045
1603718693.8388731	67	14.751999855041504
1603720311.9675345	68	13.715909004211426
1603721947.176333	69	14.928260803222656
1603723563.5992868	70	11.258333206176758
1603725182.6831045	71	15.934782981872559
1603726816.5908384	72	14.265957832336426
1603728457.7176228	73	13.571739196777344
1603730078.537002	74	12.447916984558105
1603731712.729852	75	14.184782981872559
1603733338.2953272	76	13.815384864807129
1603734974.2455335	77	17.490243911743164
1603736608.0630417	78	13.663829803466797
1603738226.5334647	79	18.15999984741211
1603739858.495009	80	14.97924518585205
1603741503.1451845	81	12.753061294555664
1603743143.2696002	82	16.574073791503906
1603744759.1913357	83	4.1785712242126465
1603746283.5248435	84	6.212500095367432
1603747850.4761283	85	10.51200008392334
1603749400.9110587	86	13.73799991607666
1603750921.9076674	87	12.296154022216797
1603752453.2239003	88	16.580554962158203
1603753981.4148304	89	10.01403522491455
1603755504.3914847	90	9.239999771118164
1603757031.8903484	91	13.82448959350586
1603758563.6116343	92	14.859259605407715
1603760131.320828	93	17.421817779541016
1603761755.2865498	94	5.681250095367432
1603763327.8028088	95	15.547825813293457
1603764890.3950775	96	14.278048515319824
1603766477.8351526	97	19.555171966552734
1603767976.8423908	98	12.882499694824219
1603769497.0995069	99	13.577777862548828
1603789798.0995069	100	14.998777862548828
