# Supplementary material
Source: ML conference proceedings conference paper supplement (https://proceedings.mlr.press/v139/rahman21a.html)
Supplement: Supplementary file 3 [file rahman21a-supp.zip › ICMLSupportingDoc 2/Visualization/OpenFortAttackRes/TRAIN/GNN/run-ebngkvwdyu-tag-Rewards_train_set.csv]

Wall time	Step	Value
1603603924.6405387	0	-3.700000047683716
1603605654.2938929	1	-5.002702713012695
1603607393.2969751	2	-7.489473819732666
1603609151.7000937	3	-5.04528284072876
1603610920.5878046	4	-5.75454568862915
1603612644.4614213	5	-7.684210300445557
1603614377.662686	6	-6.134285926818848
1603616119.5389802	7	-5.758974552154541
1603617883.7356687	8	-5.524444580078125
1603619653.3496382	9	-4.360465049743652
1603621407.451636	10	-4.790625095367432
1603623168.1003513	11	-4.008823394775391
1603624929.1362321	12	-2.5481481552124023
1603626691.9578273	13	-4.218181610107422
1603628453.2919471	14	-5.6674418449401855
1603630209.2952807	15	-4.829999923706055
1603631958.0694175	16	-4.510256290435791
1603633703.232737	17	-1.0764706134796143
1603635454.0635207	18	-9.433333396911621
1603637191.0517194	19	-0.00800000037997961
1603638942.1257603	20	-2.664102554321289
1603640700.111686	21	-0.15800000727176666
1603642443.4222746	22	-0.39142856001853943
1603644193.0882397	23	-1.6285713911056519
1603645925.2535117	24	-0.5909090638160706
1603647672.4171398	25	1.9767441749572754
1603649399.126272	26	-1.1593749523162842
1603651131.5076396	27	0.6386363506317139
1603652869.6763935	28	-2.6810810565948486
1603654605.156131	29	-0.2851063907146454
1603656330.6016295	30	1.726190447807312
1603658058.79417	31	-1.636842131614685
1603659790.8552017	32	1.9647058248519897
1603661520.4231946	33	6.039583206176758
1603663238.445391	34	3.5051281452178955
1603664938.5792947	35	0.05090909078717232
1603666649.1350887	36	6.772916793823242
1603668354.9703238	37	1.4249999523162842
1603670064.15981	38	3.27297306060791
1603671768.7848346	39	6.6954545974731445
1603673471.4509065	40	7.971428394317627
1603675149.705321	41	6.879166603088379
1603676843.8493607	42	2.252173900604248
1603678536.9360988	43	5.476190567016602
1603680230.7752213	44	6.18372106552124
1603681901.6209073	45	7.550000190734863
1603683593.8416445	46	6.577777862548828
1603685259.231824	47	7.577499866485596
1603686928.878525	48	7.150000095367432
1603688565.0838826	49	5.300000190734863
1603690205.4589803	50	11.013636589050293
1603691833.0718098	51	9.651851654052734
1603693486.6407201	52	8.14594554901123
1603695124.5199466	53	8.260605812072754
1603696755.6235354	54	8.355262756347656
1603698411.2490702	55	15.145454406738281
1603700045.911795	56	5.581818103790283
1603701685.4761302	57	11.907317161560059
1603703324.5884798	58	13.856521606445312
1603704958.5072951	59	13.884614944458008
1603706611.0673437	60	11.195555686950684
1603708255.8178735	61	11.887499809265137
1603709878.6419415	62	12.135714530944824
1603711502.066533	63	6.924138069152832
1603713127.705614	64	6.171875
1603714763.4710052	65	11.18775463104248
1603716395.4845364	66	11.680952072143555
1603717908.0566633	67	13.475555419921875
1603719477.4754696	68	13.901785850524902
1603721083.454675	69	13.84565258026123
1603722688.641844	70	12.187233924865723
1603724306.9680908	71	9.776000022888184
1603725928.0931957	72	14.117073059082031
1603727546.7092183	73	16.454761505126953
1603729154.8533523	74	8.940425872802734
1603730777.0217083	75	13.151163101196289
1603732394.018346	76	11.820930480957031
1603734007.1596737	77	13.52765941619873
1603735629.5700686	78	15.35614013671875
1603737249.6897225	79	11.050000190734863
1603738853.675143	80	13.811628341674805
1603740465.3678565	81	12.235555648803711
1603742076.3677955	82	13.925580978393555
1603743684.3432746	83	12.114893913269043
1603745250.2290382	84	13.827083587646484
1603746749.1299691	85	12.805000305175781
1603748329.9231899	86	15.627272605895996
1603749849.4600842	87	10.89310359954834
1603751388.7826638	88	9.584615707397461
1603752888.115163	89	12.699999809265137
1603754392.2255745	90	14.828888893127441
1603755905.282242	91	13.180952072143555
1603757431.25631	92	14.385416984558105
1603758986.2913194	93	15.171428680419922
1603760582.1087372	94	13.80384635925293
1603762181.6508386	95	15.05652141571045
1603763748.319392	96	9.303571701049805
1603765328.189772	97	15.402083396911621
1603766859.2475128	98	15.067441940307617
1603768357.9332223	99	7.732142925262451
1603769820.0785959	100	12.862222671508789
