# Supplementary material
Source: ML conference proceedings conference paper supplement (https://proceedings.mlr.press/v139/rahman21a.html)
Supplement: Supplementary file 3 [file rahman21a-supp.zip › ICMLSupportingDoc 2/Visualization/OpenFortAttackRes/TRAIN/GNN/run-haasdoeuvi-tag-Rewards_train_set.csv]

Wall time	Step	Value
1603603924.3859446	0	-5.379310131072998
1603605643.8596094	1	-6.3810811042785645
1603607390.4730356	2	-6.5619049072265625
1603609136.6012688	3	-5.737500190734863
1603610893.9906054	4	-6.718181610107422
1603612613.041618	5	-6.034210681915283
1603614332.0212836	6	-5.886666774749756
1603616068.7348204	7	-5.548936367034912
1603617822.6162496	8	-3.5352940559387207
1603619585.0465143	9	-4.516666889190674
1603621342.905526	10	-1.3733333349227905
1603623103.9397209	11	-4.946875095367432
1603624855.666459	12	-3.4709677696228027
1603626607.971945	13	-5.366666793823242
1603628364.9991004	14	-1.670270323753357
1603630126.9910774	15	-0.5369565486907959
1603631874.4830194	16	-2.3914284706115723
1603633626.0231717	17	-0.859375
1603635364.462684	18	-3.029411792755127
1603637094.9276886	19	-0.5538461804389954
1603638835.323235	20	-0.6970587968826294
1603640572.0593026	21	-2.4175000190734863
1603642298.6808054	22	-0.2836734652519226
1603644030.997503	23	2.875
1603645767.2016156	24	0.4955555498600006
1603647487.2898645	25	-1.7217391729354858
1603649207.0997906	26	-0.8446808457374573
1603650925.0158365	27	0.9200000166893005
1603652655.7714615	28	3.146341562271118
1603654367.283078	29	5.5720930099487305
1603656088.514448	30	1.3064515590667725
1603657811.5919816	31	2.343478202819824
1603659531.6797264	32	0.8942857384681702
1603661252.6865168	33	2.788095235824585
1603662967.569223	34	5.918604850769043
1603664666.7793324	35	3.3333332538604736
1603666375.9811132	36	4.983333110809326
1603668080.6733823	37	4.176000118255615
1603669794.2814426	38	2.670212745666504
1603671488.1963024	39	5.092857360839844
1603673189.3024511	40	7.5404253005981445
1603674854.487267	41	9.980851173400879
1603676535.1183987	42	7.351162910461426
1603678220.320749	43	7.460416793823242
1603679895.1893861	44	15.916215896606445
1603681527.7005255	45	10.414814949035645
1603683198.7525492	46	9.477551460266113
1603684832.8144665	47	8.226086616516113
1603686490.9229379	48	7.0217390060424805
1603688134.9819684	49	11.454545021057129
1603689761.7718427	50	15.356249809265137
1603691374.2670965	51	7.975675582885742
1603693030.0525904	52	14.812766075134277
1603694647.1352546	53	11.668292999267578
1603696277.8150613	54	14.653488159179688
1603697916.4685411	55	13.736169815063477
1603699552.19091	56	14.520930290222168
1603701194.4295373	57	16.225582122802734
1603702837.28344	58	11.393548011779785
1603704480.9960244	59	10.709301948547363
1603706107.9516006	60	14.061701774597168
1603707736.7869668	61	16.315555572509766
1603709366.0628483	62	15.08108139038086
1603711000.0915284	63	11.345833778381348
1603712621.704742	64	10.190476417541504
1603714250.7820086	65	15.149999618530273
1603715895.9173033	66	15.544736862182617
1603717435.7739708	67	11.532142639160156
1603718981.8872766	68	15.497825622558594
1603720596.3912401	69	15.784444808959961
1603722208.2644196	70	16.77142906188965
1603723807.927832	71	17.97317123413086
1603725414.6336236	72	16.8568172454834
1603727029.9196444	73	11.565625190734863
1603728640.3023646	74	12.449999809265137
1603730263.7620654	75	20.39454460144043
1603731874.4484425	76	17.223403930664062
1603733492.2995188	77	11.51200008392334
1603735107.901079	78	13.100000381469727
1603736740.1074343	79	12.758000373840332
1603738354.9891388	80	17.308197021484375
1603739987.060357	81	9.297916412353516
1603741612.1824381	82	5.691666603088379
1603743244.4641385	83	13.185714721679688
1603744839.8370652	84	15.608108520507812
1603746359.5011778	85	18.302438735961914
1603747943.580171	86	11.202564239501953
1603749472.6660645	87	16.325000762939453
1603751006.5945175	88	18.625490188598633
1603752530.9623432	89	11.935714721679688
1603754047.6820781	90	6.882608890533447
1603755563.1889856	91	6.946875095367432
1603757078.3733444	92	13.135000228881836
1603758617.4179218	93	15.929787635803223
1603760183.6571028	94	15.009756088256836
1603761810.1142564	95	17.592857360839844
1603763372.744701	96	16.839534759521484
1603764950.1757662	97	16.126667022705078
1603766518.29463	98	12.56382942199707
1603768051.2698126	99	16.463043212890625
1603768087.8798126	100	15.897043212890625
