# Supplementary material
Source: ML conference proceedings conference paper supplement (https://proceedings.mlr.press/v139/rahman21a.html)
Supplement: Supplementary file 3 [file rahman21a-supp.zip › ICMLSupportingDoc 2/Visualization/OpenFortAttackRes/TRAIN/GNN/run-hdtfcdcwuv-tag-Rewards_train_set.csv]

Wall time	Step	Value
1603603932.039702	0	-7.489473819732666
1603605671.4849713	1	-5.897297382354736
1603607412.1663847	2	-7.270588397979736
1603609155.3098843	3	-8.18684196472168
1603610904.477273	4	-6.066666603088379
1603612628.1833124	5	-6.116279125213623
1603614354.2190576	6	-5.267499923706055
1603616089.3434412	7	-4.790909290313721
1603617852.9062614	8	-2.883333444595337
1603619609.913244	9	-4.816666603088379
1603621375.3977733	10	-5.216363430023193
1603623130.066679	11	-5.592156887054443
1603624887.133986	12	-4.235000133514404
1603626661.994989	13	-2.295652151107788
1603628423.1275373	14	-2.662069082260132
1603630168.4769514	15	0.012500000186264515
1603631923.9056695	16	-2.443589687347412
1603633674.0867288	17	-2.4184210300445557
1603635417.210679	18	-1.8111110925674438
1603637156.3163443	19	-2.085714340209961
1603638896.9172165	20	0.5270270109176636
1603640650.7333	21	-1.8407407999038696
1603642386.097373	22	-1.6648648977279663
1603644131.547551	23	0.30000001192092896
1603645863.7662141	24	0.02549019642174244
1603647604.768359	25	-0.17000000178813934
1603649329.4456198	26	-0.6025640964508057
1603651058.6541622	27	0.21276596188545227
1603652797.637664	28	3.00600004196167
1603654515.3993697	29	-0.25555557012557983
1603656239.8536446	30	0.578125
1603657959.0113502	31	-3.303333282470703
1603659674.9867594	32	-0.7387096881866455
1603661398.80089	33	2.0711112022399902
1603663135.490078	34	5.776190280914307
1603664858.090879	35	3.0641510486602783
1603666562.0135028	36	4.844185829162598
1603668282.805488	37	6.991489410400391
1603670001.3172717	38	4.458139419555664
1603671715.3616867	39	3.367347002029419
1603673419.7307117	40	6.397777557373047
1603675113.043656	41	5.21999979019165
1603676803.4495678	42	5.838095188140869
1603678506.463974	43	5.9708333015441895
1603680199.8719308	44	6.15744686126709
1603681858.8807738	45	1.189795970916748
1603683534.618203	46	3.0577778816223145
1603685186.4404345	47	7.062963008880615
1603686864.0807145	48	6.333333492279053
1603688520.6220381	49	6.432000160217285
1603690168.6719182	50	5.106666564941406
1603691805.321061	51	3.5551724433898926
1603693454.3069277	52	3.935483932495117
1603695106.9999156	53	9.097959518432617
1603696739.5622506	54	11.996000289916992
1603698395.9118314	55	9.459183692932129
1603700043.9893994	56	11.055318832397461
1603701695.295534	57	2.7750000953674316
1603703335.8753407	58	13.452083587646484
1603704967.7299614	59	7.669230937957764
1603706607.007406	60	12.162221908569336
1603708257.4841254	61	11.106521606445312
1603709889.9417818	62	11.98799991607666
1603711528.795661	63	12.613333702087402
1603713166.1150522	64	13.890909194946289
1603714786.9160438	65	8.716666221618652
1603716422.4961936	66	14.481818199157715
1603717932.1020348	67	14.995652198791504
1603719508.7813885	68	15.289583206176758
1603721114.5178754	69	17.02750015258789
1603722725.3228319	70	13.562222480773926
1603724331.89213	71	10.341463088989258
1603725955.3386319	72	15.050000190734863
1603727554.1478066	73	15.7590913772583
1603729157.033747	74	15.230952262878418
1603730754.3568683	75	10.92173957824707
1603732373.4270642	76	16.259523391723633
1603733978.1510167	77	14.391379356384277
1603735592.2100704	78	18.105356216430664
1603737213.9129462	79	13.928260803222656
1603738814.915707	80	14.515555381774902
1603740413.0055783	81	15.496363639831543
1603742013.1871505	82	14.320833206176758
1603743618.0164235	83	11.028204917907715
1603745185.9393034	84	13.909523963928223
1603746702.1492546	85	13.536956787109375
1603748259.985524	86	3.0360000133514404
1603749784.1147308	87	11.806666374206543
1603751312.0345788	88	15.7590913772583
1603752804.2335334	89	13.63255786895752
1603754301.9486797	90	11.800000190734863
1603755797.822217	91	11.310869216918945
1603757300.6187396	92	5.958695888519287
1603758837.1592445	93	17.89230728149414
1603760423.9990869	94	14.745652198791504
1603762001.8297894	95	4.039285659790039
1603763554.708158	96	18.155555725097656
1603765123.3713298	97	15.302173614501953
1603766653.69455	98	12.242307662963867
1603768158.8017366	99	10.446808815002441
1603768356.8757366	99	11.883808815002441
