# Supplementary material
Source: ML conference proceedings conference paper supplement (https://proceedings.mlr.press/v139/rahman21a.html)
Supplement: Supplementary file 3 [file rahman21a-supp.zip › ICMLSupportingDoc 2/Visualization/OpenFortAttackRes/TRAIN/GNN/run-rldkcmzglx-tag-Rewards_train_set.csv]

Wall time	Step	Value
1603603923.410246	0	-4.038461685180664
1603605646.0112798	1	-6.8125
1603607401.0128348	2	-7.144897937774658
1603609156.8171809	3	-5.090243816375732
1603610907.8126044	4	-5.840000152587891
1603612628.9597902	5	-7.254761695861816
1603614352.6448011	6	-8.466666221618652
1603616106.7739196	7	-5.711320877075195
1603617865.556436	8	-7.275000095367432
1603619636.3246775	9	-5.891666889190674
1603621401.7856698	10	-3.6631579399108887
1603623153.5835288	11	-7.879411697387695
1603624907.064009	12	-4.7727274894714355
1603626674.6318123	13	-4.152727127075195
1603628439.79413	14	-3.6888887882232666
1603630195.8577595	15	-3.7799999713897705
1603631948.2011392	16	-2.164285659790039
1603633693.0547938	17	-2.2918918132781982
1603635437.0054772	18	-0.24074074625968933
1603637187.3388255	19	0.6959999799728394
1603638940.861796	20	0.6560975313186646
1603640702.0291889	21	0.42692306637763977
1603642437.0779424	22	-0.6631578803062439
1603644179.7465868	23	-1.8473684787750244
1603645913.1326954	24	1.875
1603647635.2204816	25	3.221874952316284
1603649368.1594868	26	3.0122807025909424
1603651095.0443423	27	3.426666736602783
1603652814.574525	28	5.37441873550415
1603654533.8939416	29	1.4313725233078003
1603656242.2627287	30	0.5346153974533081
1603657963.686209	31	4.665853500366211
1603659683.9302104	32	5.611111164093018
1603661409.0137823	33	-1.263157844543457
1603663118.0975752	34	0.2566666603088379
1603664820.1167555	35	3.435483932495117
1603666537.1710918	36	3.869767427444458
1603668256.4494572	37	5.409090995788574
1603669980.1968784	38	6.741379261016846
1603671692.210484	39	2.057692289352417
1603673398.3412728	40	8.131999969482422
1603675083.8834603	41	3.941666603088379
1603676757.3337486	42	11.07272720336914
1603678443.7514284	43	8.84615421295166
1603680119.6714246	44	6.77419376373291
1603681774.905618	45	5.012499809265137
1603683445.0008445	46	11.547368049621582
1603685092.5191884	47	12.329411506652832
1603686756.5349953	48	7.097142696380615
1603688400.4446673	49	5.531818389892578
1603690045.5002975	50	10.551922798156738
1603691674.8318887	51	9.342424392700195
1603693335.8769827	52	9.838775634765625
1603694960.7649577	53	18.831707000732422
1603696577.1090934	54	8.178571701049805
1603698235.9683478	55	9.729999542236328
1603699889.3410382	56	13.290908813476562
1603701550.3640006	57	16.95142936706543
1603703208.0709755	58	13.393478393554688
1603704864.6471074	59	10.045454978942871
1603706516.2460454	60	8.181818008422852
1603708160.070915	61	9.180644989013672
1603709810.8584323	62	8.493749618530273
1603711445.9047167	63	10.930000305175781
1603713099.068286	64	14.093181610107422
1603714771.296757	65	17.590476989746094
1603716417.3188145	66	12.748888969421387
1603717938.6340845	67	11.686274528503418
1603719510.5840218	68	10.39142894744873
1603721120.8535135	69	13.719047546386719
1603722750.1751156	70	16.339130401611328
1603724368.6980379	71	16.379070281982422
1603725984.5918524	72	14.22978687286377
1603727618.0972176	73	13.358695983886719
1603729255.1271217	74	17.63166618347168
1603730861.1797338	75	9.474074363708496
1603732489.1465478	76	15.151851654052734
1603734108.0522842	77	15.463043212890625
1603735732.8001738	78	15.047727584838867
1603737349.8406487	79	13.201818466186523
1603738980.8739512	80	16.586362838745117
1603740601.999169	81	14.047059059143066
1603742235.6522622	82	17.05862045288086
1603743861.2844458	83	14.210869789123535
1603745438.7047045	84	14.835556030273438
1603746973.1984572	85	15.74666690826416
1603748554.0871367	86	15.699999809265137
1603750063.401502	87	15.100000381469727
1603751605.342712	88	11.97826099395752
1603753121.9634445	89	15.19361686706543
1603754655.7433093	90	7.40625
1603756173.1666834	91	9.921428680419922
1603757708.604855	92	16.80862045288086
1603759250.5399914	93	13.435999870300293
1603760893.7241178	94	17.64385986328125
1603762479.9391873	95	12.893548011779785
1603764051.309799	96	8.399999618530273
1603765645.625087	97	15.741304397583008
1603767203.8983595	98	9.93617057800293
1603768733.93953	99	10.658536911010742
1603768737.93953	100	12.176536911010742
