# Supplementary material
Source: ML conference proceedings conference paper supplement (https://proceedings.mlr.press/v139/rahman21a.html)
Supplement: Supplementary file 3 [file rahman21a-supp.zip › ICMLSupportingDoc 2/Visualization/OpenFortAttackRes/TRAIN/GNN/run-xnawgewlkx-tag-Rewards_train_set.csv]

Wall time	Step	Value
1603603932.3213587	0	-4.636363506317139
1603605657.321749	1	-8.246511459350586
1603607405.8439753	2	-4.0969696044921875
1603609156.2118871	3	-6.860975742340088
1603610900.6278348	4	-3.816128969192505
1603612631.0012853	5	-5.71999979019165
1603614366.1968744	6	-4.521276473999023
1603616097.8306553	7	-4.119999885559082
1603617863.0105543	8	-5.702272891998291
1603619631.3456092	9	-3.5730769634246826
1603621385.6885512	10	-2.3023810386657715
1603623143.6167412	11	-1.2279069423675537
1603624899.348608	12	-4.775609970092773
1603626660.622705	13	-2.395918369293213
1603628415.494715	14	-4.230000019073486
1603630172.4316413	15	-3.123809576034546
1603631936.074421	16	-0.6957446932792664
1603633687.3862762	17	-1.837499976158142
1603635456.0529375	18	-2.504878044128418
1603637200.1891778	19	-1.52765953540802
1603638941.304298	20	-1.1842105388641357
1603640677.6983213	21	-3.567857027053833
1603642415.3653822	22	-1.496551752090454
1603644144.867174	23	-0.8139534592628479
1603645870.5183601	24	-1.9259259700775146
1603647603.2385569	25	-1.2428570985794067
1603649334.9958687	26	-1.0823529958724976
1603651079.118246	27	0.684482753276825
1603652800.643153	28	0.6875
1603654516.9008074	29	-0.34285715222358704
1603656244.4338725	30	3.651724100112915
1603657970.6678343	31	1.9720929861068726
1603659689.708162	32	2.6048779487609863
1603661413.5760748	33	3.69024395942688
1603663124.4673674	34	7.527500152587891
1603664843.5976825	35	2.2266666889190674
1603666552.4063737	36	3.9021739959716797
1603668279.8005295	37	1.1535714864730835
1603669988.5207884	38	4.199999809265137
1603671688.9915535	39	3.0423076152801514
1603673410.0468347	40	4.474468231201172
1603675107.663413	41	10.246428489685059
1603676802.3591146	42	7.80930233001709
1603678474.675841	43	4.019354820251465
1603680164.2441285	44	4.12666654586792
1603681801.6131735	45	9.028888702392578
1603683471.3092656	46	10.485365867614746
1603685104.835604	47	13.357999801635742
1603686751.6452587	48	7.1065216064453125
1603688384.7652044	49	11.428260803222656
1603690000.1704292	50	8.811538696289062
1603691651.8941472	51	12.622221946716309
1603693309.5517452	52	7.059999942779541
1603694930.86391	53	12.672727584838867
1603696554.1867115	54	11.512195587158203
1603698198.9604275	55	8.271875381469727
1603699856.9534807	56	13.670000076293945
1603701502.9933116	57	8.879166603088379
1603703144.2786498	58	12.519607543945312
1603704787.7494166	59	9.987096786499023
1603706444.2855785	60	13.32758617401123
1603708074.4465425	61	11.86296272277832
1603709729.3016446	62	17.095237731933594
1603711371.7838662	63	11.926530838012695
1603713010.151607	64	14.104255676269531
1603714662.5823991	65	16.980487823486328
1603716303.4044545	66	12.606383323669434
1603717828.4328923	67	13.49148941040039
1603719404.697952	68	16.342105865478516
1603721007.3289948	69	13.220000267028809
1603722609.9190187	70	14.155814170837402
1603724217.651093	71	12.224138259887695
1603725840.2153957	72	17.053333282470703
1603727444.0066867	73	16.766666412353516
1603729033.1029654	74	12.51111125946045
1603730654.8726866	75	14.662790298461914
1603732264.2414339	76	13.688095092773438
1603733883.6576314	77	18.4654541015625
1603735496.6441398	78	12.045238494873047
1603737117.7103724	79	14.780434608459473
1603738734.0951083	80	12.989361763000488
1603740344.3611207	81	16.134042739868164
1603741945.6331995	82	20.42926788330078
1603743561.0712333	83	14.572916984558105
1603745130.4842036	84	14.467308044433594
1603746649.8813543	85	16.477272033691406
1603748221.3019063	86	16.854999542236328
1603749745.9434237	87	17.762962341308594
1603751277.7849393	88	8.934884071350098
1603752791.5065227	89	13.35952377319336
1603754286.7867932	90	13.85952377319336
1603755799.1287177	91	14.475000381469727
1603757306.1843472	92	15.204347610473633
1603758844.5984037	93	14.550000190734863
1603760410.6324513	94	11.924138069152832
1603762022.8107057	95	15.508695602416992
1603763603.6856904	96	18.65660285949707
1603765155.958766	97	18.841463088989258
1603766699.1568887	98	11.916666984558105
1603768208.4133015	99	16.887500762939453
1603768208.6133015	100	15.987500762939453
