# Supplementary material
Source: ML conference proceedings conference paper supplement (https://proceedings.mlr.press/v139/rahman21a.html)
Supplement: Supplementary file 3 [file rahman21a-supp.zip › ICMLSupportingDoc 2/Visualization/OpenFortAttackRes/TRAIN/GNN_test/run-annltlptcl-tag-Rewards_eval.csv]

Wall time	Step	Value
1603603943.7498946	0	-3.25
1603605667.283658	1	-6.6310343742370605
1603607386.2161605	2	-5.685714244842529
1603609130.8181102	3	-5.190476417541504
1603610879.9122314	4	-3.9170732498168945
1603612601.5324252	5	-6.059259414672852
1603614326.0949814	6	-4.050000190734863
1603616055.0404086	7	-6.197368621826172
1603617812.5505333	8	-3.7923076152801514
1603619566.709432	9	-4.762068748474121
1603621320.4527986	10	-1.3677419424057007
1603623067.6453228	11	-5.936585426330566
1603624824.246145	12	-4.547727108001709
1603626575.5460336	13	-3.4828572273254395
1603628332.997602	14	-3.527083396911621
1603630078.482707	15	-0.09200000017881393
1603631826.137169	16	-2.6772727966308594
1603633571.0357232	17	-4.320000171661377
1603635313.6554942	18	-1.7803921699523926
1603637038.6599097	19	-0.4433962404727936
1603638760.0533693	20	-4.050000190734863
1603640490.6621583	21	0.12399999797344208
1603642216.9694376	22	-1.5880000591278076
1603643960.1027968	23	0.9578947424888611
1603645681.9367561	24	-0.4749999940395355
1603647407.4058523	25	3.088235378265381
1603649123.4667966	26	0.6029411554336548
1603650843.620102	27	-0.21794871985912323
1603652557.6901634	28	1.0518518686294556
1603654271.0219831	29	1.1097561120986938
1603656003.5852678	30	8.882222175598145
1603657717.3960238	31	-2.242424249649048
1603659442.4774644	32	11.589583396911621
1603661156.0422065	33	7.630434989929199
1603662872.7869773	34	8.004444122314453
1603664576.0737298	35	4.221052646636963
1603666262.5306447	36	4.974999904632568
1603667953.5734816	37	3.0586206912994385
1603669650.6197133	38	3.3127660751342773
1603671336.5503347	39	10.247727394104004
1603673012.2957942	40	9.417142868041992
1603674675.736975	41	7.548571586608887
1603676338.065573	42	15.433333396911621
1603678009.4875987	43	4.206250190734863
1603679671.9337542	44	12.479545593261719
1603681307.4157906	45	5.263888835906982
1603682951.7266254	46	9.60444450378418
1603684565.3781016	47	10.09428596496582
1603686214.8372984	48	6.96363639831543
1603687838.1715481	49	10.76956558227539
1603689448.7502599	50	9.896875381469727
1603691063.5931993	51	16.88260841369629
1603692703.6768916	52	9.632352828979492
1603694332.0704625	53	12.878571510314941
1603695948.3257105	54	8.954166412353516
1603697585.94988	55	11.854902267456055
1603699228.9889777	56	13.237735748291016
1603700886.697115	57	11.871110916137695
1603702525.494175	58	14.420408248901367
1603704168.0331533	59	6.49399995803833
1603705800.699015	60	9.003125190734863
1603707445.915065	61	15.46382999420166
1603709083.7462626	62	12.477418899536133
1603710742.5297825	63	14.90638256072998
1603712374.8887792	64	14.240740776062012
1603714007.1480603	65	12.380768775939941
1603715662.4078088	66	17.15614128112793
1603717228.777055	67	9.883636474609375
1603718749.7702043	68	8.08648681640625
1603720342.4209695	69	10.591489791870117
1603721950.5139658	70	12.358333587646484
1603723560.5521014	71	13.579999923706055
1603725177.5865624	72	12.67884635925293
1603726785.2891586	73	15.152000427246094
1603728392.1434948	74	7.796428680419922
1603729992.415234	75	11.115385055541992
1603731616.4588616	76	16.37872314453125
1603733223.3027697	77	9.231034278869629
1603734841.0309644	78	15.960000038146973
1603736458.9103708	79	11.238709449768066
1603738058.710026	80	16.727272033691406
1603739673.6705852	81	14.988636016845703
1603741281.1074936	82	15.132143020629883
1603742882.228589	83	12.453845977783203
1603744488.2939665	84	15.518518447875977
1603746019.2366328	85	15.869999885559082
1603747572.042151	86	11.726470947265625
1603749120.5161011	87	14.797825813293457
1603750641.648268	88	17.867441177368164
1603752181.5678875	89	14.714583396911621
1603753702.0027	90	11.864706039428711
1603755216.9750943	91	16.330612182617188
1603756726.2996402	92	13.519148826599121
1603758250.0744812	93	15.134210586547852
1603759801.4961188	94	14.017391204833984
1603761420.691595	95	17.481395721435547
1603762979.381236	96	1.3666666746139526
1603764546.3406193	97	20.327587127685547
1603766109.9914742	98	17.163461685180664
1603767624.481865	99	19.75238037109375
