# Supplementary material
Source: ML conference proceedings conference paper supplement (https://proceedings.mlr.press/v139/rahman21a.html)
Supplement: Supplementary file 3 [file rahman21a-supp.zip › ICMLSupportingDoc 2/Visualization/OpenFortAttackRes/TRAIN/GNN_test/run-baowkcwvgy-tag-Rewards_eval.csv]

Wall time	Step	Value
1603603939.7443748	0	-7.97560977935791
1603605662.3411272	1	-6.579999923706055
1603607399.609206	2	-7.599999904632568
1603609141.0057037	3	-6.734782695770264
1603610891.9864273	4	-5.227499961853027
1603612609.0323842	5	-3.640540599822998
1603614331.4320927	6	-2.5166666507720947
1603616067.335075	7	-3.7153847217559814
1603617830.4903684	8	-4.199999809265137
1603619591.1486046	9	-4.346153736114502
1603621343.9115477	10	-4.7727274894714355
1603623107.2715526	11	-4.657777786254883
1603624861.7518585	12	-2.5999999046325684
1603626627.2395349	13	-3.4326086044311523
1603628392.1948335	14	-2.184375047683716
1603630147.5649147	15	-3.948648691177368
1603631900.8303697	16	-2.7809524536132812
1603633656.6041842	17	-2.753333330154419
1603635406.1554122	18	-1.4612903594970703
1603637155.3262339	19	-3.19655179977417
1603638908.4038932	20	-4.599999904632568
1603640662.652221	21	-4.435897350311279
1603642418.4786165	22	-3.6384615898132324
1603644177.4190917	23	-1.6122448444366455
1603645925.0227275	24	-3.5731706619262695
1603647667.6419744	25	-1.9205127954483032
1603649409.928217	26	-2.3428571224212646
1603651153.7069504	27	-1.3513513803482056
1603652896.0335295	28	-1.4307692050933838
1603654638.1005824	29	-0.43030303716659546
1603656378.434474	30	0.6151515245437622
1603658106.508778	31	-0.6974999904632568
1603659834.6700423	32	-6.970588207244873
1603661553.546056	33	0.3176470696926117
1603663278.5265737	34	2.0382351875305176
1603664985.1097472	35	-4.111111164093018
1603666707.6973336	36	1.4658536911010742
1603668424.1481571	37	4.294117450714111
1603670130.3006203	38	4.262744903564453
1603671846.7866788	39	10.27450942993164
1603673532.1197736	40	5.757575988769531
1603675222.5653827	41	3.297560930252075
1603676901.809013	42	12.316666603088379
1603678594.4864054	43	8.473684310913086
1603680274.424298	44	7.496153831481934
1603681921.9509144	45	8.33666706085205
1603683562.8143022	46	8.49148941040039
1603685207.7063394	47	11.421951293945312
1603686853.0196176	48	11.854545593261719
1603688489.3605685	49	12.944000244140625
1603690114.4722373	50	10.904081344604492
1603691747.1074939	51	11.272340774536133
1603693384.8449533	52	13.020930290222168
1603695015.1535912	53	-1.5615384578704834
1603696651.253432	54	13.236169815063477
1603698298.5918312	55	16.31041717529297
1603699946.2881021	56	14.009374618530273
1603701599.329967	57	12.395454406738281
1603703241.353499	58	13.053333282470703
1603704881.5080893	59	11.333333015441895
1603706505.3837116	60	6.587500095367432
1603708141.25239	61	13.470833778381348
1603709788.4476376	62	12.619999885559082
1603711441.071136	63	15.96274471282959
1603713088.240978	64	11.580850601196289
1603714742.095139	65	11.638298034667969
1603716369.8372562	66	-2.9071428775787354
1603717862.5850997	67	7.415999889373779
1603719437.699918	68	13.121212005615234
1603721049.7978294	69	13.114285469055176
1603722674.5760472	70	10.552631378173828
1603724288.0778916	71	12.722222328186035
1603725899.4862142	72	6.60277795791626
1603727514.1702795	73	15.92765998840332
1603729140.677382	74	7.925000190734863
1603730753.220925	75	13.40434741973877
1603732386.684093	76	14.271697998046875
1603734006.9001591	77	8.658620834350586
1603735627.9547768	78	14.420408248901367
1603737242.503398	79	12.154545783996582
1603738845.860914	80	-1.6428571939468384
1603740477.8681056	81	14.987500190734863
1603742099.8400366	82	20.051111221313477
1603743703.95825	83	12.109999656677246
1603745272.5949044	84	12.560416221618652
1603746800.9183083	85	12.129166603088379
1603748369.7953296	86	16.541934967041016
1603749878.0055053	87	13.64838695526123
1603751416.9835703	88	15.208823204040527
1603752925.872434	89	11.397058486938477
1603754435.3915792	90	13.265517234802246
1603755953.8843887	91	16.270212173461914
1603757483.6394973	92	20.542104721069336
1603759010.7618399	93	21.738094329833984
1603760616.9802353	94	8.519607543945312
1603762228.135175	95	19.14883804321289
1603763795.261703	96	-1.5727273225784302
1603765379.5037227	97	12.813333511352539
1603766934.232696	98	9.737500190734863
1603768455.7382305	99	14.013043403625488
