# Supplementary material
Source: ML conference proceedings conference paper supplement (https://proceedings.mlr.press/v139/rahman21a.html)
Supplement: Supplementary file 3 [file rahman21a-supp.zip › ICMLSupportingDoc 2/Visualization/OpenFortAttackRes/TRAIN/GNN_test/run-ccngnbeaox-tag-Rewards_eval.csv]

Wall time	Step	Value
1603603939.4069421	0	-8.962963104248047
1603605679.9156516	1	-5.692307472229004
1603607434.6893454	2	-3.551851749420166
1603609191.9447272	3	-6.065306186676025
1603610951.9237413	4	-4.1192307472229
1603612675.4660606	5	-3.594285726547241
1603614406.260716	6	-5.215151309967041
1603616143.5510287	7	-4.09782600402832
1603617910.7004666	8	-3.6314284801483154
1603619668.8854697	9	-2.922727346420288
1603621435.2462232	10	-4.297222137451172
1603623193.73807	11	-1.711111068725586
1603624964.5163348	12	-5.561110973358154
1603626728.2322824	13	-1.7374999523162842
1603628493.163325	14	-3.268571376800537
1603630250.870885	15	-4.59354829788208
1603632012.52059	16	-3.1500000953674316
1603633754.8118095	17	-6.221052646636963
1603635508.1812577	18	-3.4478261470794678
1603637260.0064852	19	-2.498076915740967
1603639021.3799772	20	-1.8916666507720947
1603640777.0416763	21	-2.2959184646606445
1603642525.8010647	22	-2.5696969032287598
1603644284.7616994	23	0.8674418330192566
1603646028.5178716	24	-0.03076923079788685
1603647770.029963	25	-1.1026315689086914
1603649512.919563	26	-1.2999999523162842
1603651254.195556	27	0.3404761850833893
1603652986.3538246	28	-0.15909090638160706
1603654721.8010242	29	-1.4513514041900635
1603656462.4037788	30	1.024999976158142
1603658196.5723333	31	-1.2476190328598022
1603659931.0547857	32	0.6590909361839294
1603661668.2624762	33	0.36486485600471497
1603663391.952377	34	0.17407406866550446
1603665119.084007	35	4.125532150268555
1603666836.4972782	36	3.0920000076293945
1603668568.457167	37	4.3591837882995605
1603670305.5173814	38	8.541463851928711
1603672043.9244425	39	3.8228070735931396
1603673768.2684736	40	3.1772727966308594
1603675475.5203218	41	5.1370368003845215
1603677206.5548787	42	10.244231224060059
1603678923.3357627	43	5.376744270324707
1603680610.101288	44	7.491891860961914
1603682296.0008736	45	7.896551609039307
1603683979.1395054	46	9.941304206848145
1603685663.8603108	47	6.394594669342041
1603687346.7227952	48	7.669444561004639
1603689016.848788	49	7.788372039794922
1603690672.5355227	50	5.112121105194092
1603692363.241213	51	10.371999740600586
1603694020.1868114	52	10.325714111328125
1603695699.0871742	53	11.369231224060059
1603697341.4268155	54	12.240385055541992
1603699009.0764039	55	10.070270538330078
1603700688.4574964	56	10.42790699005127
1603702344.9573402	57	11.09117603302002
1603704003.471272	58	15.748275756835938
1603705677.0323508	59	8.513333320617676
1603707323.274001	60	12.50967788696289
1603708988.5041788	61	7.627999782562256
1603710629.2731535	62	11.887096405029297
1603712292.564915	63	9.997727394104004
1603713949.5766103	64	9.710526466369629
1603715602.8519735	65	9.445454597473145
1603717174.9969368	66	14.901923179626465
1603718708.5327232	67	11.554545402526855
1603720334.8629599	68	15.772727012634277
1603721964.3679993	69	14.655555725097656
1603723586.5792174	70	14.32800006866455
1603725210.7994692	71	15.30363655090332
1603726840.4635687	72	12.840425491333008
1603728470.0359912	73	11.242307662963867
1603730097.9624572	74	10.592499732971191
1603731736.676905	75	14.597959518432617
1603733364.7526846	76	15.407843589782715
1603734998.9930775	77	16.810203552246094
1603736624.3599942	78	10.208107948303223
1603738254.6293998	79	18.144229888916016
1603739881.5239966	80	14.656521797180176
1603741526.4900794	81	10.293749809265137
1603743170.676937	82	15.055999755859375
1603744774.3106925	83	7.578571319580078
1603746303.9664066	84	6.1061224937438965
1603747870.620409	85	13.270000457763672
1603749416.840541	86	16.761537551879883
1603750943.142678	87	14.836170196533203
1603752472.7180939	88	14.534146308898926
1603753992.3871229	89	11.662500381469727
1603755531.1791368	90	13.52075481414795
1603757047.7732947	91	10.332432746887207
1603758577.4559608	92	10.306666374206543
1603760149.614163	93	17.380769729614258
1603761778.8565938	94	9.071999549865723
1603763339.9200974	95	12.649999618530273
1603764910.9175217	96	16.038637161254883
1603766485.2634215	97	-1.7857142686843872
1603767993.4882314	98	10.070588111877441
1603769516.2766683	99	16.097618103027344
