# Supplementary material
Source: ML conference proceedings conference paper supplement (https://proceedings.mlr.press/v139/rahman21a.html)
Supplement: Supplementary file 3 [file rahman21a-supp.zip › ICMLSupportingDoc 2/Visualization/OpenFortAttackRes/TRAIN/GNN_test/run-ebngkvwdyu-tag-Rewards_eval.csv]

Wall time	Step	Value
1603603942.5998156	0	-4.028571605682373
1603605669.0859973	1	-7.596875190734863
1603607411.673835	2	-7.497560977935791
1603609168.4113326	3	-6.541025638580322
1603610934.9875104	4	-5.3606061935424805
1603612661.9078343	5	-3.2023255825042725
1603614393.7291183	6	-5.3023810386657715
1603616135.785079	7	-6.160975456237793
1603617903.0556989	8	-6.018750190734863
1603619667.5177584	9	-5.018181800842285
1603621427.577052	10	-3.31333327293396
1603623181.1527276	11	-4.245161056518555
1603624946.7863505	12	-3.7279069423675537
1603626710.8057897	13	-1.604347825050354
1603628467.0172448	14	-3.022580623626709
1603630223.8414357	15	-1.2468750476837158
1603631971.5517192	16	-2.7757575511932373
1603633723.199026	17	-1.64130437374115
1603635469.801601	18	0.09459459781646729
1603637211.871282	19	1.9051282405853271
1603638963.7768843	20	0.0021739129442721605
1603640720.583892	21	-1.2795917987823486
1603642462.9075234	22	-0.9200000166893005
1603644207.3710072	23	-0.991428554058075
1603645949.7155137	24	-1.5981131792068481
1603647692.1295357	25	0.573913037776947
1603649411.498321	26	-0.4448275864124298
1603651153.7076497	27	-0.2480769157409668
1603652888.4130495	28	-0.16744185984134674
1603654620.640617	29	3.814814805984497
1603656349.7263103	30	0.6380952596664429
1603658082.2258687	31	-0.20600000023841858
1603659809.6855702	32	1.0850000381469727
1603661543.3446712	33	8.276190757751465
1603663248.0004592	34	-3.933333396911621
1603664957.7048242	35	2.513157844543457
1603666668.8721583	36	9.887499809265137
1603668377.6654286	37	3.618000030517578
1603670087.8204577	38	8.171428680419922
1603671794.4172451	39	7.650000095367432
1603673482.109521	40	7.15238094329834
1603675167.340225	41	9.805882453918457
1603676866.106342	42	3.2791666984558105
1603678555.7509604	43	4.597368240356445
1603680250.4821293	44	4.900000095367432
1603681926.0338979	45	9.729412078857422
1603683615.0702114	46	6.518604755401611
1603685276.7465484	47	6.282352924346924
1603686947.249795	48	8.908571243286133
1603688590.691973	49	8.118867874145508
1603690224.3023226	50	9.587879180908203
1603691853.5612688	51	8.637777328491211
1603693508.4521725	52	6.416326522827148
1603695148.9551215	53	11.558695793151855
1603696773.177282	54	7.433333396911621
1603698429.8851213	55	14.416666984558105
1603700068.631988	56	9.753488540649414
1603701709.480901	57	11.304255485534668
1603703342.8487847	58	13.513333320617676
1603704979.8111868	59	13.364999771118164
1603706634.8495708	60	14.223913192749023
1603708272.9256089	61	12.174074172973633
1603709896.6226144	62	15.67199993133545
1603711526.185071	63	12.45111083984375
1603713147.4397464	64	14.843243598937988
1603714783.8341317	65	15.30740737915039
1603716411.942997	66	8.83448314666748
1603717922.5867634	67	9.61379337310791
1603719497.5016031	68	9.545714378356934
1603721114.6094418	69	13.491228103637695
1603722717.7812784	70	14.4296293258667
1603724331.600794	71	10.269388198852539
1603725960.010694	72	17.13793182373047
1603727570.137629	73	15.434042930603027
1603729181.5322788	74	10.902000427246094
1603730801.3482592	75	12.448936462402344
1603732411.1236148	76	12.733333587646484
1603734030.4001775	77	15.502272605895996
1603735652.4708242	78	14.454347610473633
1603737263.7011492	79	10.359259605407715
1603738875.437527	80	17.513635635375977
1603740491.8300934	81	13.018367767333984
1603742100.4116445	82	17.79777717590332
1603743698.3901963	83	11.644444465637207
1603745261.9633238	84	17.482608795166016
1603746777.015755	85	11.807843208312988
1603748353.6500633	86	17.88163185119629
1603749880.2785513	87	16.744827270507812
1603751402.8049603	88	8.971428871154785
1603752902.4377997	89	14.658333778381348
1603754412.1254013	90	20.017072677612305
1603755926.1470933	91	12.479545593261719
1603757458.464504	92	14.098214149475098
1603759009.8294585	93	14.418749809265137
1603760614.1357508	94	17.97142791748047
1603762205.1766784	95	15.253191947937012
1603763773.8388329	96	12.887755393981934
1603765347.7539184	97	17.247499465942383
1603766872.7424233	98	15.631034851074219
1603768379.1255443	99	12.69347858428955
