# Supplementary material
Source: ML conference proceedings conference paper supplement (https://proceedings.mlr.press/v139/rahman21a.html)
Supplement: Supplementary file 3 [file rahman21a-supp.zip › ICMLSupportingDoc 2/Visualization/OpenFortAttackRes/TRAIN/GNN_test/run-haasdoeuvi-tag-Rewards_eval.csv]

Wall time	Step	Value
1603603940.426965	0	-4.77142858505249
1603605661.1443088	1	-4.3230767250061035
1603607405.489626	2	-5.93030309677124
1603609149.5615613	3	-4.018750190734863
1603610908.8855696	4	-6.705263137817383
1603612624.811336	5	-5.661904811859131
1603614344.436825	6	-7.545454502105713
1603616085.01654	7	-4.490697860717773
1603617840.6367414	8	-4.079591751098633
1603619602.36857	9	-3.7772727012634277
1603621362.123917	10	-3.529787302017212
1603623122.8892887	11	-2.747619152069092
1603624869.3264427	12	-5.786110877990723
1603626623.2896516	13	-2.1818182468414307
1603628378.6280968	14	-3.6700000762939453
1603630145.3163931	15	-4.517073154449463
1603631897.792397	16	-2.7042553424835205
1603633636.3110588	17	-7.3470587730407715
1603635373.435793	18	-6.127777576446533
1603637114.7801979	19	-4.151020526885986
1603638855.419972	20	0.4648648500442505
1603640586.033747	21	-1.2970588207244873
1603642316.5045445	22	-0.9878048896789551
1603644057.7054744	23	2.703636407852173
1603645784.0947351	24	-0.03333333507180214
1603647505.9083645	25	0.9906976819038391
1603649220.4254355	26	-0.6466666460037231
1603650944.82282	27	-0.9170212745666504
1603652671.0329916	28	1.793548345565796
1603654392.9836016	29	4.192592620849609
1603656110.660081	30	2.683333396911621
1603657828.9874127	31	2.5756757259368896
1603659547.444395	32	1.0820512771606445
1603661270.0331397	33	4.797059059143066
1603662990.9257104	34	5.079591751098633
1603664692.772396	35	4.854545593261719
1603666390.1306272	36	8.141379356384277
1603668100.1659124	37	5.461111068725586
1603669812.469319	38	2.146341562271118
1603671514.6548104	39	8.180000305175781
1603673199.0819418	40	-3.0
1603674870.7648976	41	6.6529412269592285
1603676553.156883	42	7.724999904632568
1603678237.0341544	43	2.9675676822662354
1603679911.414973	44	11.361289978027344
1603681559.3062763	45	12.69152545928955
1603683217.1685305	46	8.278571128845215
1603684849.897785	47	9.048484802246094
1603686509.6882846	48	10.324999809265137
1603688149.7458615	49	12.065625190734863
1603689778.8074334	50	11.405881881713867
1603691389.0856173	51	10.393939018249512
1603693044.6640222	52	12.637930870056152
1603694669.565332	53	14.74222183227539
1603696299.2665434	54	11.473333358764648
1603697931.6187081	55	14.555171966552734
1603699572.4220726	56	15.29534912109375
1603701218.5511637	57	12.983673095703125
1603702863.7060542	58	12.324528694152832
1603704490.2269049	59	-0.6333333253860474
1603706118.787525	60	11.9399995803833
1603707751.920309	61	12.300000190734863
1603709381.796052	62	13.19677448272705
1603711015.2199612	63	9.100000381469727
1603712633.834389	64	8.969230651855469
1603714265.1356974	65	11.430000305175781
1603715912.9449275	66	14.464515686035156
1603717457.714246	67	16.06739044189453
1603719004.1292634	68	15.857446670532227
1603720618.7460952	69	15.274999618530273
1603722221.9917898	70	15.079999923706055
1603723824.0752969	71	16.374074935913086
1603725443.8058205	72	17.469999313354492
1603727052.4010963	73	9.94347858428955
1603728657.3054438	74	16.84482765197754
1603730276.888257	75	13.126922607421875
1603731892.1290975	76	13.459375381469727
1603733513.36936	77	15.777777671813965
1603735132.4419355	78	17.164583206176758
1603736758.7595835	79	12.443333625793457
1603738378.7472987	80	16.365217208862305
1603740013.744593	81	10.175000190734863
1603741630.6332884	82	2.866666555404663
1603743262.1050117	83	14.453125
1603744861.7154698	84	18.100000381469727
1603746388.568802	85	20.920690536499023
1603747966.7829823	86	11.84615421295166
1603749495.3927414	87	22.222726821899414
1603751028.638001	88	16.288637161254883
1603752558.6990027	89	17.88888931274414
1603754068.5976758	90	18.175556182861328
1603755584.9564638	91	11.084782600402832
1603757099.6422985	92	18.48297882080078
1603758638.3264863	93	18.425580978393555
1603760206.241988	94	13.674418449401855
1603761824.7051606	95	15.083999633789062
1603763394.0469003	96	18.450000762939453
1603764965.1870234	97	13.978124618530273
1603766539.8898306	98	15.823809623718262
1603768072.8343573	99	17.815555572509766
