# Supplementary material
Source: ML conference proceedings conference paper supplement (https://proceedings.mlr.press/v139/rahman21a.html)
Supplement: Supplementary file 3 [file rahman21a-supp.zip › ICMLSupportingDoc 2/Visualization/OpenFortAttackRes/TRAIN/GNN_test/run-hdtfcdcwuv-tag-Rewards_eval.csv]

Wall time	Step	Value
1603603956.0505338	0	-5.184000015258789
1603605685.0190995	1	-6.870270252227783
1603607428.171586	2	-7.035555362701416
1603609169.6437514	3	-6.871874809265137
1603610918.221669	4	-3.5545454025268555
1603612640.5580432	5	-3.7464284896850586
1603614373.9202964	6	-3.8125
1603616111.8195858	7	-2.7980000972747803
1603617869.1858218	8	-4.931707382202148
1603619627.6771002	9	-6.124390125274658
1603621394.7819638	10	-5.793749809265137
1603623151.7967618	11	-2.3382978439331055
1603624912.3801818	12	-4.128302097320557
1603626680.317201	13	-3.5975000858306885
1603628435.4116497	14	-2.567857027053833
1603630187.9051428	15	-1.9500000476837158
1603631944.0890813	16	-2.715217351913452
1603633693.9380972	17	-2.752380847930908
1603635431.8631546	18	-1.9606060981750488
1603637170.9632857	19	-3.3138887882232666
1603638919.2842276	20	-0.5226414799690247
1603640671.5727355	21	0.3804877996444702
1603642410.0154305	22	-0.3415094316005707
1603644147.3161201	23	-0.4906249940395355
1603645885.9856381	24	-2.9170212745666504
1603647620.2329013	25	-2.6666667461395264
1603649348.1573503	26	-0.22631579637527466
1603651078.9241836	27	0.16818182170391083
1603652813.609197	28	0.8192307949066162
1603654534.5550349	29	1.1111111640930176
1603656264.0858917	30	0.8551020622253418
1603657981.7889907	31	-1.3340425491333008
1603659694.3601968	32	0.058974359184503555
1603661422.1657686	33	6.395349025726318
1603663156.9848225	34	3.0888888835906982
1603664871.0389514	35	2.633333444595337
1603666580.1386704	36	2.0114285945892334
1603668302.0755093	37	4.564102649688721
1603670025.0164726	38	3.710416555404663
1603671731.6490052	39	4.159999847412109
1603673435.920742	40	6.048387050628662
1603675136.6929052	41	5.977550983428955
1603676830.7610447	42	4.803773403167725
1603678524.9534037	43	4.667567729949951
1603680222.8185039	44	5.120408058166504
1603681879.8427994	45	4.965909004211426
1603683558.0299816	46	2.686000108718872
1603685207.2405229	47	8.65999984741211
1603686886.6303208	48	7.167346954345703
1603688531.1839972	49	7.237500190734863
1603690182.707439	50	4.574193477630615
1603691824.493556	51	3.992500066757202
1603693481.220624	52	8.968965530395508
1603695136.0075257	53	11.880768775939941
1603696765.8188925	54	15.284615516662598
1603698415.182799	55	12.403225898742676
1603700070.3605247	56	12.284000396728516
1603701712.804522	57	2.771052598953247
1603703352.1659834	58	9.069999694824219
1603704987.830543	59	5.726315975189209
1603706629.3581269	60	9.402083396911621
1603708284.036305	61	10.514893531799316
1603709910.652158	62	13.782926559448242
1603711556.6197724	63	16.328571319580078
1603713188.8796778	64	12.685714721679688
1603714805.2404346	65	11.909090995788574
1603716443.8122125	66	15.638636589050293
1603717956.4718137	67	14.173999786376953
1603719528.3983316	68	15.843589782714844
1603721139.3163958	69	15.713043212890625
1603722743.1626952	70	9.635293960571289
1603724349.4835997	71	10.361289978027344
1603725980.8876584	72	14.233333587646484
1603727580.2881646	73	14.521276473999023
1603729176.694718	74	12.421875
1603730782.060111	75	14.086538314819336
1603732396.0994163	76	13.14888858795166
1603733999.879049	77	15.699999809265137
1603735618.0136328	78	15.006122589111328
1603737238.140983	79	17.537208557128906
1603738835.405213	80	17.363157272338867
1603740427.2635083	81	16.91200065612793
1603742035.4590197	82	16.0
1603743640.1606517	83	17.55238151550293
1603745208.2402396	84	14.149999618530273
1603746721.8261588	85	10.164285659790039
1603748283.103506	86	4.8729166984558105
1603749803.755925	87	13.234210968017578
1603751328.8334613	88	9.452940940856934
1603752824.6725008	89	16.36046600341797
1603754320.2927222	90	15.873332977294922
1603755820.0180697	91	14.800000190734863
1603757326.9524078	92	7.7779998779296875
1603758862.7068222	93	14.564705848693848
1603760438.522551	94	13.800000190734863
1603762015.4343374	95	4.304166793823242
1603763585.0194058	96	21.598276138305664
1603765140.0014343	97	18.808000564575195
1603766667.0902984	98	16.924999237060547
1603768180.3748515	99	9.32325553894043
