# Supplementary material
Source: ML conference proceedings conference paper supplement (https://proceedings.mlr.press/v139/rahman21a.html)
Supplement: Supplementary file 3 [file rahman21a-supp.zip › ICMLSupportingDoc 2/Visualization/OpenFortAttackRes/TRAIN/GNN_test/run-rldkcmzglx-tag-Rewards_eval.csv]

Wall time	Step	Value
1603603933.7333567	0	-7.550000190734863
1603605665.0612512	1	-6.875
1603607425.6377635	2	-3.318000078201294
1603609175.0120902	3	-2.174999952316284
1603610924.8348641	4	-4.802702903747559
1603612642.6468835	5	-5.849999904632568
1603614375.1734219	6	-5.3326921463012695
1603616124.9745214	7	-5.177358627319336
1603617888.6433299	8	-4.215094566345215
1603619649.4826128	9	-5.648275852203369
1603621418.2214773	10	-1.1909091472625732
1603623170.154995	11	-5.340476036071777
1603624923.6348805	12	-3.455263137817383
1603626692.5649219	13	-0.9971428513526917
1603628456.2111886	14	-2.164102554321289
1603630208.508868	15	-3.4870967864990234
1603631961.8993294	16	-2.414285659790039
1603633710.806254	17	-3.4131579399108887
1603635462.0309033	18	-0.05925925821065903
1603637211.204433	19	-1.5132075548171997
1603638962.7949674	20	-1.0625
1603640722.0417643	21	0.3531914949417114
1603642457.6219263	22	1.6159090995788574
1603644199.8685324	23	-1.4720929861068726
1603645933.436569	24	-1.465116262435913
1603647655.0379012	25	0.9463414549827576
1603649391.88606	26	7.317777633666992
1603651114.3305876	27	0.7825000286102295
1603652841.6737251	28	8.989583015441895
1603654551.5821576	29	1.929729700088501
1603656270.5991998	30	2.75
1603657987.6115031	31	5.487234115600586
1603659708.3673608	32	5.038775444030762
1603661425.9546392	33	-0.8441176414489746
1603663131.7868848	34	2.0592591762542725
1603664847.8688788	35	9.638298034667969
1603666555.7610996	36	-1.0162161588668823
1603668278.1086075	37	2.2125000953674316
1603670004.999877	38	9.514893531799316
1603671716.3524673	39	4.719149112701416
1603673419.1397502	40	6.825714111328125
1603675090.3307831	41	-3.8416666984558105
1603676773.3553197	42	8.66451644897461
1603678451.0075805	43	-1.7714285850524902
1603680142.1543977	44	8.470000267028809
1603681795.9032986	45	7.562790870666504
1603683464.9318118	46	6.532557964324951
1603685108.9419608	47	12.731034278869629
1603686778.154135	48	14.077777862548828
1603688416.9838054	49	11.315625190734863
1603690063.452845	50	10.679487228393555
1603691697.0317843	51	13.339130401611328
1603693352.8613448	52	7.954285621643066
1603694974.2954862	53	13.956666946411133
1603696596.3869412	54	11.118182182312012
1603698253.2458658	55	11.621874809265137
1603699907.6282039	56	12.791666984558105
1603701571.5614705	57	13.297778129577637
1603703229.53944	58	12.946341514587402
1603704879.4667609	59	10.378571510314941
1603706538.2102268	60	15.750980377197266
1603708183.738744	61	11.248979568481445
1603709828.2398505	62	10.5
1603711463.9586377	63	13.958823204040527
1603713121.3899517	64	12.836956977844238
1603714792.057225	65	10.402631759643555
1603716443.013662	66	18.70652198791504
1603717954.495344	67	10.868749618530273
1603719532.6260424	68	17.380952835083008
1603721142.7315652	69	13.108888626098633
1603722773.0313182	70	14.90217399597168
1603724391.2403758	71	14.806666374206543
1603726004.9231944	72	18.237499237060547
1603727628.9210138	73	8.984000205993652
1603729269.5136433	74	13.94137954711914
1603730883.0738273	75	9.482978820800781
1603732502.235228	76	14.98799991607666
1603734122.5545287	77	13.916666984558105
1603735750.5235114	78	12.221875190734863
1603737377.9706526	79	16.3764705657959
1603739004.1626246	80	18.061702728271484
1603740620.4224396	81	17.583871841430664
1603742258.2382135	82	15.429787635803223
1603743889.4464898	83	18.333999633789062
1603745454.5703628	84	14.678788185119629
1603746991.2468863	85	15.641379356384277
1603748579.655158	86	18.428302764892578
1603750079.3571904	87	9.94705867767334
1603751627.4604144	88	14.389361381530762
1603753143.3149338	89	17.620832443237305
1603754668.7325425	90	10.170370101928711
1603756197.6140153	91	16.438297271728516
1603757729.6182733	92	18.802173614501953
1603759273.1338487	93	14.187999725341797
1603760909.3069305	94	16.66153907775879
1603762501.6990244	95	15.61276626586914
1603764075.3532875	96	12.803921699523926
1603765660.3659914	97	15.610713958740234
1603767224.676209	98	12.175555229187012
1603768758.5615613	99	12.905769348144531
