# Supplementary material
Source: ML conference proceedings conference paper supplement (https://proceedings.mlr.press/v139/rahman21a.html)
Supplement: Supplementary file 3 [file rahman21a-supp.zip › ICMLSupportingDoc 2/Visualization/OpenFortAttackRes/TRAIN/GNN_test/run-xnawgewlkx-tag-Rewards_eval.csv]

Wall time	Step	Value
1603603944.6631567	0	-7.136363506317139
1603605675.1580076	1	-6.935555458068848
1603607425.8678422	2	-4.097727298736572
1603609171.6471436	3	-6.926470756530762
1603610919.5872238	4	-4.817500114440918
1603612646.9853034	5	-3.5511112213134766
1603614382.600503	6	-3.6605262756347656
1603616116.618908	7	-5.5333333015441895
1603617879.1773255	8	-4.7302327156066895
1603619644.1473205	9	-4.468965530395508
1603621405.1736743	10	-3.9069766998291016
1603623154.3282928	11	-5.919230937957764
1603624914.7350225	12	-2.9909090995788574
1603626677.5831623	13	0.1473684161901474
1603628436.434588	14	-4.052000045776367
1603630194.724549	15	-0.20227272808551788
1603631948.2989268	16	-2.2119998931884766
1603633711.9059477	17	-2.3781819343566895
1603635468.7256474	18	1.0888888835906982
1603637218.146358	19	-0.27941176295280457
1603638960.0545132	20	-0.7186046242713928
1603640692.8850715	21	-2.6057143211364746
1603642433.7617323	22	0.26750001311302185
1603644162.765631	23	-1.9714285135269165
1603645893.1864069	24	-1.4836734533309937
1603647619.915505	25	-0.6114285588264465
1603649359.676529	26	1.2760000228881836
1603651096.582114	27	-0.6449999809265137
1603652819.121736	28	1.9405405521392822
1603654539.940532	29	1.0355556011199951
1603656271.0480375	30	2.3686275482177734
1603657983.673363	31	1.25
1603659708.3399725	32	1.876190423965454
1603661431.2854047	33	3.480645179748535
1603663148.8582456	34	7.659999847412109
1603664861.3025692	35	3.9000000953674316
1603666580.3294084	36	2.5859649181365967
1603668304.3510554	37	3.9159998893737793
1603670010.5993352	38	7.380000114440918
1603671714.4050188	39	6.426414966583252
1603673439.7367184	40	5.242372989654541
1603675132.836502	41	11.257143020629883
1603676812.8580806	42	7.164999961853027
1603678500.2438867	43	8.351020812988281
1603680182.9953198	44	5.1621623039245605
1603681824.0475926	45	11.680435180664062
1603683490.0365746	46	4.153658390045166
1603685120.981775	47	11.094118118286133
1603686772.9469755	48	6.085714340209961
1603688404.8555868	49	12.313333511352539
1603690022.7956948	50	16.984783172607422
1603691671.231961	51	9.696874618530273
1603693331.7361076	52	10.436735153198242
1603694955.0971072	53	9.763461112976074
1603696577.5504415	54	13.317646980285645
1603698225.7107809	55	12.156363487243652
1603699878.2189674	56	15.873170852661133
1603701519.9920135	57	7.432499885559082
1603703161.8851585	58	12.811111450195312
1603704809.210315	59	11.053333282470703
1603706466.4765284	60	12.660465240478516
1603708099.8048186	61	18.019149780273438
1603709747.928617	62	13.593548774719238
1603711397.174673	63	12.43962287902832
1603713032.8158584	64	14.880000114440918
1603714687.5403738	65	15.747916221618652
1603716326.4345677	66	12.865957260131836
1603717851.2507071	67	12.65294075012207
1603719423.976019	68	12.674285888671875
1603721019.802925	69	13.52400016784668
1603722631.6728384	70	13.124444007873535
1603724247.8922515	71	17.296552658081055
1603725854.2545757	72	14.03870964050293
1603727453.916395	73	0.9888888597488403
1603729053.4442463	74	13.897619247436523
1603730676.15882	75	18.45121955871582
1603732289.317948	76	15.887499809265137
1603733909.5600824	77	16.183332443237305
1603735524.0430386	78	14.182692527770996
1603737139.4181008	79	16.622222900390625
1603738752.3852463	80	12.717143058776855
1603740358.1330132	81	14.017857551574707
1603741967.962466	82	16.222726821899414
1603743580.2239835	83	19.179487228393555
1603745151.555111	84	18.809301376342773
1603746671.608544	85	19.549999237060547
1603748236.4622097	86	14.863333702087402
1603749760.1559699	87	18.373912811279297
1603751297.308247	88	12.335000038146973
1603752807.5662398	89	10.375
1603754314.8056118	90	16.11034393310547
1603755813.0515988	91	14.722222328186035
1603757329.986278	92	13.34313678741455
1603758857.7285936	93	17.87826156616211
1603760436.3326073	94	17.70833396911621
1603762047.6299517	95	16.68000030517578
1603763624.921827	96	18.406665802001953
1603765179.0999386	97	18.47599983215332
1603766714.6644435	98	13.185185432434082
1603768225.2336295	99	11.006250381469727
