# Supplementary material
Source: ML conference proceedings conference paper supplement (https://proceedings.mlr.press/v139/rahman21a.html)
Supplement: Supplementary file 3 [file rahman21a-supp.zip › ICMLSupportingDoc 2/Visualization/OpenFortAttackRes/TRAIN/GPL/run-bmzkntvgtr-tag-Rewards_train_set.csv]

Wall time	Step	Value
1608145967.4424477	0	-8.44347858428955
1608147233.440842	1	-3.584615468978882
1608148488.5123217	2	-4.494736671447754
1608149723.1345947	3	-4.675609588623047
1608150941.0121577	4	-2.359999895095825
1608152193.6181512	5	-4.163636207580566
1608153453.452898	6	-5.058139324188232
1608154704.1914248	7	-6.0
1608155986.8842666	8	-4.321052551269531
1608157249.0564253	9	-2.5037035942077637
1608158530.106299	10	-3.843902349472046
1608159807.7407327	11	-1.3468749523162842
1608161086.6255882	12	-5.793749809265137
1608162332.8562644	13	-4.039999961853027
1608163551.1445007	14	-1.191176414489746
1608164746.2054055	15	-4.391176700592041
1608165944.3389482	16	-3.582758665084839
1608167139.1889882	17	-3.859999895095825
1608168349.6609952	18	-3.153125047683716
1608169577.862312	19	-2.450000047683716
1608170762.0754907	20	-1.5680850744247437
1608171949.9952009	21	-2.752631664276123
1608173109.2835834	22	-0.8269230723381042
1608174281.023036	23	0.6352941393852234
1608175433.7454836	24	0.20000000298023224
1608176588.0346909	25	2.0888888835906982
1608177752.3626046	26	-0.6609756350517273
1608178909.4536254	27	1.3272727727890015
1608180070.4123092	28	1.8346153497695923
1608181208.7604103	29	0.4611110985279083
1608182345.0271409	30	-0.158620685338974
1608183483.2571344	31	2.950000047683716
1608184608.1508906	32	-0.04500000178813934
1608185762.587587	33	2.5999999046325684
1608186927.7041035	34	2.2564103603363037
1608188080.4528224	35	0.6909090876579285
1608189227.474389	36	0.6035714149475098
1608190515.0920439	37	2.5098040103912354
1608192046.2825441	38	1.2581818103790283
1608193565.4729826	39	4.03870964050293
1608195067.7271156	40	7.642499923706055
1608196576.4317935	41	2.6694445610046387
1608198063.8638818	42	7.643181800842285
1608199551.7464192	43	2.0807693004608154
1608201051.0286205	44	4.962500095367432
1608202544.374375	45	8.295652389526367
1608204057.2946763	46	5.950980186462402
1608205532.929189	47	7.504878044128418
1608207018.7759137	48	7.4365386962890625
1608208498.7565634	49	6.339024543762207
1608209965.5483134	50	13.440425872802734
1608211424.9394605	51	9.46363639831543
1608212918.796813	52	12.017499923706055
1608214368.54598	53	8.919230461120605
1608215816.513736	54	10.185185432434082
1608217271.82289	55	13.457447052001953
1608218715.7337403	56	11.203636169433594
1608220151.240954	57	13.66333293914795
1608221602.9044082	58	8.390000343322754
1608223062.5972471	59	14.684210777282715
1608224517.6196105	60	15.295238494873047
1608225988.7583358	61	-3.4357142448425293
1608227468.810134	62	14.124324798583984
1608228937.3875146	63	14.899999618530273
1608230383.797018	64	14.72449016571045
1608231828.3930523	65	14.879166603088379
1608233285.7027962	66	7.78000020980835
1608234739.1451986	67	13.734999656677246
1608236207.4955306	68	18.742591857910156
1608237653.4121907	69	13.33214282989502
1608239145.8359854	70	14.202174186706543
1608240641.0811653	71	16.05869483947754
1608242130.0158515	72	16.811628341674805
1608243593.086895	73	17.11777687072754
1608245058.429175	74	11.406896591186523
1608246560.5178118	75	19.282142639160156
1608248013.9470456	76	15.362222671508789
1608249486.6622539	77	15.276086807250977
1608250968.5336356	78	16.40217399597168
1608252424.3332338	79	13.917647361755371
1608253883.6025717	80	14.516666412353516
1608255344.2135634	81	15.393333435058594
1608256802.156124	82	9.41333293914795
1608258270.4005418	83	14.132143020629883
1608259741.7604535	84	18.695453643798828
1608261188.814088	85	12.942856788635254
1608262635.264895	86	17.910417556762695
1608264108.7617593	87	18.33571434020996
1608265566.98113	88	17.977272033691406
1608267032.454766	89	15.247368812561035
1608268505.947734	90	11.465624809265137
1608269979.3107624	91	15.985713958740234
1608271472.7243228	92	15.392857551574707
1608272963.905911	93	15.164102554321289
1608274437.8692875	94	13.780488014221191
1608275920.928403	95	16.767391204833984
1608277420.728341	96	18.75957489013672
1608278913.446754	97	16.547916412353516
1608280387.131276	98	16.99534797668457
1608281735.4592826	99	15.284210205078125
