# Supplementary material
Source: ML conference proceedings conference paper supplement (https://proceedings.mlr.press/v139/rahman21a.html)
Supplement: Supplementary file 3 [file rahman21a-supp.zip › ICMLSupportingDoc 2/Visualization/OpenFortAttackRes/TRAIN/GPL/run-dawcxuisnk-tag-Rewards_train_set.csv]

Wall time	Step	Value
1608145955.2967594	0	-2.882352828979492
1608147175.2901533	1	-6.114285945892334
1608148389.2043529	2	-6.528571605682373
1608149591.7111988	3	-5.294594764709473
1608150783.1378076	4	-4.882926940917969
1608151988.9211988	5	-6.285714149475098
1608153192.2010372	6	-4.213513374328613
1608154410.025777	7	-5.046428680419922
1608155618.5811548	8	-4.23421049118042
1608156825.742338	9	-4.344117641448975
1608158021.0271027	10	-3.1627907752990723
1608159215.7360294	11	-4.51578950881958
1608160429.449363	12	-4.1078948974609375
1608161655.5150805	13	-5.2618184089660645
1608162889.1727538	14	-2.376190423965454
1608164100.0049982	15	-4.981249809265137
1608165305.8450668	16	-2.851515054702759
1608166507.6427708	17	-1.1975610256195068
1608167691.6579423	18	-0.24166665971279144
1608168896.5216334	19	-2.628124952316284
1608170070.5763788	20	0.15312500298023224
1608171246.1611397	21	-2.6433334350585938
1608172411.4886842	22	0.25294119119644165
1608173568.5203822	23	-0.6613636612892151
1608174713.651139	24	1.745945930480957
1608175872.754698	25	1.5520000457763672
1608177029.6121545	26	-0.3285714387893677
1608178172.7136765	27	-0.737500011920929
1608179327.9360178	28	2.9145455360412598
1608180460.8167117	29	3.7821428775787354
1608181583.46355	30	2.5055556297302246
1608182708.4138715	31	0.9674418568611145
1608183819.4966106	32	2.663888931274414
1608184938.263712	33	5.821739196777344
1608186099.1053915	34	5.699999809265137
1608187262.2034357	35	4.456521511077881
1608188407.761868	36	3.4953489303588867
1608189547.3689697	37	4.260714054107666
1608190908.9483244	38	5.746341228485107
1608192406.8183541	39	7.246153831481934
1608193901.0963507	40	4.285714149475098
1608195378.907841	41	5.111538410186768
1608196837.123941	42	5.471795082092285
1608198287.401303	43	5.475675582885742
1608199753.089277	44	11.871999740600586
1608201217.9359207	45	8.870588302612305
1608202686.1361625	46	13.697674751281738
1608204146.8251946	47	6.69444465637207
1608205596.7146218	48	8.512499809265137
1608207021.4224892	49	11.845161437988281
1608208451.2035742	50	14.459183692932129
1608209880.6801605	51	15.29534912109375
1608211303.952111	52	10.470967292785645
1608212733.1402924	53	13.684615135192871
1608214142.1573222	54	17.55135154724121
1608215549.178454	55	15.40238094329834
1608216966.6815968	56	14.628571510314941
1608218374.8785648	57	9.713333129882812
1608219796.7131643	58	15.004347801208496
1608221224.592757	59	13.676595687866211
1608222655.4141114	60	15.581818580627441
1608224090.7924025	61	16.137208938598633
1608225518.2250986	62	16.684444427490234
1608226944.1162593	63	16.693477630615234
1608228352.5312307	64	13.918604850769043
1608229771.3454077	65	14.638636589050293
1608231202.0632749	66	9.229412078857422
1608232627.6311874	67	16.705263137817383
1608234053.5235577	68	13.718000411987305
1608235482.4481237	69	13.727907180786133
1608236900.5993395	70	14.956521987915039
1608238323.8457415	71	16.955318450927734
1608239737.3512247	72	13.757447242736816
1608241152.6026487	73	17.238298416137695
1608242563.5118833	74	16.402082443237305
1608243993.5623832	75	17.879629135131836
1608245410.7794292	76	12.165116310119629
1608246841.349323	77	16.68000030517578
1608248258.7422264	78	14.068750381469727
1608249686.5278487	79	17.76976776123047
1608251113.0012438	80	13.525489807128906
1608252539.9610627	81	16.722726821899414
1608253982.666336	82	14.831034660339355
1608255424.3172913	83	15.691071510314941
1608256854.3822596	84	14.029999732971191
1608258293.8358045	85	18.02321434020996
1608259734.8887835	86	15.322916984558105
1608261186.061621	87	18.731914520263672
1608262647.7903557	88	20.64285659790039
1608264088.7492237	89	15.879630088806152
1608265512.5911174	90	16.868085861206055
1608266941.314163	91	19.35333251953125
1608268370.5264857	92	17.156818389892578
1608269815.484856	93	17.330188751220703
1608271250.6684918	94	15.514583587646484
1608272713.2922063	95	18.81333351135254
1608274193.7951024	96	17.467391967773438
1608275658.4313643	97	18.513954162597656
1608277111.7641134	98	16.71956443786621
1608278568.7295618	99	16.097959518432617
