# Supplementary material
Source: ML conference proceedings conference paper supplement (https://proceedings.mlr.press/v139/rahman21a.html)
Supplement: Supplementary file 3 [file rahman21a-supp.zip › ICMLSupportingDoc 2/Visualization/OpenFortAttackRes/TRAIN/GPL/run-gqxwzfsenl-tag-Rewards_train_set.csv]

Wall time	Step	Value
1608145965.9686937	0	-5.400000095367432
1608147209.5845664	1	-4.184615612030029
1608148447.992585	2	-4.161110877990723
1608149695.4226122	3	-5.722727298736572
1608150944.1794634	4	-5.67714262008667
1608152215.289951	5	-5.755172252655029
1608153515.8057454	6	-4.389999866485596
1608154801.1195674	7	-3.731818199157715
1608156055.3118353	8	-3.168750047683716
1608157290.2356057	9	-6.003448486328125
1608158519.5016181	10	-3.825000047683716
1608159726.597984	11	-1.245945930480957
1608160929.432501	12	-2.1440000534057617
1608162128.8673155	13	-4.199999809265137
1608163323.8040285	14	-2.075000047683716
1608164520.0572908	15	-2.375
1608165714.338637	16	-2.038888931274414
1608166913.514938	17	-1.519444465637207
1608168107.6860375	18	-0.5837838053703308
1608169275.6140015	19	0.4340425431728363
1608170434.384474	20	-2.3970587253570557
1608171630.566328	21	0.917391300201416
1608172800.2046242	22	1.5913043022155762
1608173965.8534577	23	-0.4871794879436493
1608175136.1624467	24	0.2827586233615875
1608176320.7491956	25	0.884782612323761
1608177489.935358	26	0.8852941393852234
1608178656.4024515	27	1.493617057800293
1608179834.3583438	28	-0.40294116735458374
1608181007.5114639	29	1.4114285707473755
1608182179.790724	30	4.663636207580566
1608183349.7938964	31	2.554285764694214
1608184519.2596588	32	5.469565391540527
1608185665.3362489	33	5.393181800842285
1608186820.5509434	34	4.713158130645752
1608187964.8634982	35	6.206818103790283
1608189087.5352151	36	5.877777576446533
1608190293.7763734	37	3.2725000381469727
1608191771.7034624	38	6.3971428871154785
1608193206.341344	39	-2.3499999046325684
1608194637.6738942	40	7.793877601623535
1608196045.0960464	41	8.210000038146973
1608197467.7004647	42	9.60200023651123
1608198877.791557	43	10.109375
1608200291.971408	44	9.617073059082031
1608201682.6652915	45	14.264444351196289
1608203089.521226	46	12.653191566467285
1608204543.754744	47	7.760000228881836
1608205982.9860725	48	7.048484802246094
1608207418.3341556	49	8.229412078857422
1608208830.3086023	50	13.751999855041504
1608210254.4743154	51	14.635714530944824
1608211683.825516	52	9.812121391296387
1608213131.7360249	53	11.240625381469727
1608214546.796428	54	11.855555534362793
1608215979.4132895	55	10.183333396911621
1608217416.6790414	56	15.117777824401855
1608218827.3771422	57	14.061363220214844
1608220255.1965773	58	15.946808815002441
1608221675.9403028	59	14.355319023132324
1608223090.403113	60	10.99032211303711
1608224512.426948	61	5.875
1608225940.4634311	62	11.686274528503418
1608227366.5461972	63	13.379069328308105
1608228820.177309	64	11.375
1608230255.3847313	65	16.406665802001953
1608231675.5043275	66	16.204347610473633
1608233110.7600245	67	10.029032707214355
1608234558.380761	68	18.06818199157715
1608236005.1510806	69	13.399999618530273
1608237445.7872555	70	11.23658561706543
1608238916.588018	71	13.175862312316895
1608240401.28074	72	18.097618103027344
1608241860.2976446	73	17.27179527282715
1608243307.503782	74	11.782608985900879
1608244735.6423967	75	16.75384521484375
1608246212.4210892	76	10.555000305175781
1608247684.805669	77	14.70862102508545
1608249154.930166	78	15.12631607055664
1608250610.2668712	79	7.3466668128967285
1608252042.5448587	80	13.204000473022461
1608253456.566693	81	15.345454216003418
1608254873.2492576	82	12.945097923278809
1608256312.5758832	83	16.26744270324707
1608257781.0599136	84	14.28600025177002
1608259257.1096678	85	13.631111145019531
1608260716.2668743	86	16.5
1608262185.127422	87	13.612000465393066
1608263682.91477	88	17.358333587646484
1608265155.407767	89	8.191304206848145
1608266628.7180793	90	19.961402893066406
1608268064.9814696	91	15.669767379760742
1608269522.3233206	92	15.124489784240723
1608270975.7279904	93	13.439285278320312
1608272435.516867	94	17.770000457763672
1608273878.4876077	95	14.453571319580078
1608275351.248485	96	12.323333740234375
1608276821.5982833	97	8.470833778381348
1608278302.902381	98	15.984782218933105
1608279790.6488538	99	12.807316780090332
