# Supplementary material
Source: ML conference proceedings conference paper supplement (https://proceedings.mlr.press/v139/rahman21a.html)
Supplement: Supplementary file 3 [file rahman21a-supp.zip › ICMLSupportingDoc 2/Visualization/OpenFortAttackRes/TRAIN/GPL/run-hskuwhhuur-tag-Rewards_train_set.csv]

Wall time	Step	Value
1608145963.083353	0	-5.383333206176758
1608147189.8731458	1	-6.493750095367432
1608148424.9277143	2	-3.447058916091919
1608149668.800163	3	-5.303225994110107
1608150924.410843	4	-5.210638523101807
1608152169.2653787	5	-2.1057143211364746
1608153357.8469424	6	-6.274418830871582
1608154551.9027646	7	-3.9857141971588135
1608155720.6058016	8	-5.973684310913086
1608156898.0008285	9	-3.8119046688079834
1608158105.7985969	10	-3.8266665935516357
1608159302.6331873	11	-4.492856979370117
1608160506.8276775	12	-5.22857141494751
1608161711.7330604	13	-6.563636302947998
1608162892.8446949	14	0.7892857193946838
1608164074.9107263	15	-2.799999952316284
1608165256.004535	16	-2.6170730590820312
1608166478.609421	17	-2.5147058963775635
1608167679.3235662	18	-2.9641025066375732
1608168851.8722818	19	-4.973170757293701
1608170032.103789	20	-1.8666666746139526
1608171225.606288	21	-2.652777671813965
1608172423.0158923	22	-3.5487804412841797
1608173620.7639701	23	0.791304349899292
1608174809.6218014	24	-0.9800000190734863
1608175993.538683	25	-0.12653061747550964
1608177165.89626	26	-0.6000000238418579
1608178321.3543806	27	1.0895832777023315
1608179496.7864335	28	0.6147058606147766
1608180647.2651403	29	0.7289473414421082
1608181852.2149117	30	4.793548583984375
1608183048.1031256	31	1.0743589401245117
1608184239.9629781	32	1.7574467658996582
1608185415.3315701	33	1.908108115196228
1608186593.739931	34	2.3657894134521484
1608187755.8911278	35	3.692857027053833
1608188890.1690989	36	2.052500009536743
1608190047.5448556	37	8.083333015441895
1608191559.9202185	38	2.8125
1608193057.9248116	39	1.7799999713897705
1608194554.5726523	40	6.881481647491455
1608196018.7651405	41	5.951162815093994
1608197488.812802	42	4.489285945892334
1608198962.1250455	43	5.3979997634887695
1608200420.0913918	44	4.841176509857178
1608201894.9462245	45	7.8913044929504395
1608203343.942313	46	10.969767570495605
1608204806.2525268	47	6.779411792755127
1608206266.6798573	48	9.458333015441895
1608207719.9163146	49	8.823077201843262
1608209163.471859	50	6.490624904632568
1608210600.7405488	51	7.320000171661377
1608212070.0347402	52	7.55555534362793
1608213533.5209994	53	7.239999771118164
1608214991.534129	54	11.21276569366455
1608216430.355093	55	6.67435884475708
1608217880.7645307	56	8.392857551574707
1608219337.8807626	57	9.793333053588867
1608220782.92003	58	1.3428571224212646
1608222240.385713	59	11.49622631072998
1608223670.5918887	60	14.038095474243164
1608225118.7334554	61	15.833333015441895
1608226592.50261	62	12.38620662689209
1608228058.850465	63	11.107999801635742
1608229520.5167644	64	14.089362144470215
1608230971.1242993	65	12.959091186523438
1608232421.072816	66	14.675555229187012
1608233858.361845	67	8.677419662475586
1608235293.4406505	68	17.09298324584961
1608236728.0194275	69	15.204545021057129
1608238178.7710996	70	13.669767379760742
1608239629.6009383	71	13.758139610290527
1608241061.8552432	72	16.482221603393555
1608242498.1139095	73	14.397727012634277
1608243938.742681	74	11.515000343322754
1608245365.968218	75	12.810344696044922
1608246811.068613	76	13.199999809265137
1608248256.5198295	77	14.012765884399414
1608249707.5233417	78	14.959524154663086
1608251161.2858117	79	13.165306091308594
1608252604.5009844	80	12.42258071899414
1608254055.465386	81	13.830232620239258
1608255513.2535746	82	15.156521797180176
1608256959.4266574	83	16.531578063964844
1608258404.041522	84	15.886956214904785
1608259833.4083035	85	11.300000190734863
1608261254.425043	86	6.287096977233887
1608262679.0520847	87	4.300000190734863
1608264154.172567	88	19.083637237548828
1608265609.1801202	89	18.296491622924805
1608267050.5868518	90	14.893333435058594
1608268500.9188132	91	16.827499389648438
1608269961.0925548	92	15.57209300994873
1608271397.4892383	93	14.974468231201172
1608272851.5926967	94	16.348936080932617
1608274299.5639813	95	17.091304779052734
1608275739.5075223	96	16.747726440429688
1608277169.649025	97	19.176191329956055
1608278601.0927153	98	8.758333206176758
1608280039.2049167	99	12.864285469055176
