# Supplementary material
Source: ML conference proceedings conference paper supplement (https://proceedings.mlr.press/v139/rahman21a.html)
Supplement: Supplementary file 3 [file rahman21a-supp.zip › ICMLSupportingDoc 2/Visualization/OpenFortAttackRes/TRAIN/GPL/run-qtlecpmdup-tag-Rewards_train_set.csv]

Wall time	Step	Value
1608145956.279422	0	-7.97599983215332
1608147214.272585	1	-7.869999885559082
1608148470.1014678	2	-3.974193572998047
1608149689.44246	3	-3.754838705062866
1608150875.5683756	4	-5.452777862548828
1608152069.4412196	5	-5.995238304138184
1608153268.5218034	6	-6.599999904632568
1608154466.811498	7	-1.7068965435028076
1608155676.8065984	8	-3.223684310913086
1608156879.8749902	9	-4.314285755157471
1608158072.5262587	10	-6.291304111480713
1608159275.538705	11	-4.459090709686279
1608160496.8838263	12	-6.1895833015441895
1608161719.5989838	13	-3.366666555404663
1608162941.2076666	14	-5.060784339904785
1608164150.2022886	15	-1.9199999570846558
1608165346.9459264	16	-3.1961538791656494
1608166542.613342	17	1.8161290884017944
1608167711.1057248	18	-1.537500023841858
1608168914.5738099	19	-3.2166666984558105
1608170120.7848115	20	-1.63103449344635
1608171320.8398433	21	-0.2906250059604645
1608172503.7704525	22	-1.994871735572815
1608173679.8674362	23	-1.26285719871521
1608174862.5482318	24	-1.22653067111969
1608176025.954456	25	-0.4272727370262146
1608177184.9189792	26	-1.8688888549804688
1608178344.5393662	27	0.25
1608179510.7819006	28	-1.1304347515106201
1608180663.741444	29	3.5410256385803223
1608181790.1330502	30	3.0250000953674316
1608182925.8978214	31	4.4384613037109375
1608184058.8027432	32	3.7874999046325684
1608185207.289391	33	2.252000093460083
1608186370.4545903	34	4.449999809265137
1608187529.7641773	35	3.1871795654296875
1608188673.683946	36	3.723684310913086
1608189817.9994693	37	5.558333396911621
1608191261.1966066	38	4.282978534698486
1608192760.433947	39	6.8816328048706055
1608194264.8502662	40	7.374509811401367
1608195749.8627198	41	7.062963008880615
1608197224.5075881	42	3.9380953311920166
1608198685.1000228	43	8.505555152893066
1608200180.7468107	44	7.890909194946289
1608201644.933607	45	10.878846168518066
1608203135.9184778	46	13.517777442932129
1608204589.7025104	47	10.933333396911621
1608206037.8956666	48	11.211538314819336
1608207489.592884	49	9.660606384277344
1608208946.5115004	50	13.43684196472168
1608210396.455959	51	13.171875
1608211855.2868292	52	13.088889122009277
1608213303.2376537	53	10.708000183105469
1608214712.5701976	54	9.90625
1608216138.695552	55	10.696428298950195
1608217567.270632	56	16.182979583740234
1608219022.5007303	57	7.992105484008789
1608220465.2826355	58	16.41794776916504
1608221918.5156267	59	12.103333473205566
1608223360.5430694	60	9.329166412353516
1608224813.5518763	61	12.804255485534668
1608226259.565146	62	12.396428108215332
1608227710.0092978	63	14.14888858795166
1608229132.5527463	64	10.680644989013672
1608230574.4062042	65	14.358695983886719
1608232017.3688755	66	15.242552757263184
1608233445.31594	67	11.024242401123047
1608234887.1859655	68	17.081396102905273
1608236342.5434458	69	15.064705848693848
1608237775.0834532	70	18.573684692382812
1608239225.7918339	71	17.022499084472656
1608240651.4865289	72	14.973333358764648
1608242074.898457	73	11.530232429504395
1608243507.879911	74	11.69677448272705
1608244927.1585734	75	14.11379337310791
1608246382.3084676	76	16.21875
1608247846.0955288	77	10.600000381469727
1608249295.8868303	78	14.886666297912598
1608250766.5637865	79	17.456409454345703
1608252180.3993433	80	17.03396224975586
1608253580.8388975	81	17.202381134033203
1608254983.7835455	82	16.682926177978516
1608256423.4260375	83	16.79111099243164
1608257849.2667062	84	21.876785278320312
1608259289.2973022	85	19.96500015258789
1608260710.2065165	86	18.527660369873047
1608262151.0116854	87	17.864286422729492
1608263607.530606	88	15.655319213867188
1608265046.7744095	89	15.35106372833252
1608266482.8525422	90	16.577777862548828
1608267924.1284893	91	18.895238876342773
1608269351.4242759	92	17.86888885498047
1608270788.6445706	93	19.07391357421875
1608272226.0239697	94	16.373077392578125
1608273681.7541785	95	18.421428680419922
1608275122.0927083	96	14.074358940124512
1608276550.371911	97	19.22954559326172
1608277972.8368905	98	17.995832443237305
1608279425.2680523	99	21.53636360168457
1608280832.0169783	100	18.343181610107422
