# Supplementary material
Source: ML conference proceedings conference paper supplement (https://proceedings.mlr.press/v139/rahman21a.html)
Supplement: Supplementary file 3 [file rahman21a-supp.zip › ICMLSupportingDoc 2/Visualization/OpenFortAttackRes/TRAIN/GPL/run-rrchchikfu-tag-Rewards_train_set.csv]

Wall time	Step	Value
1608145975.2321618	0	-6.276666641235352
1608147198.5917325	1	-4.275609970092773
1608148441.786972	2	-2.739393949508667
1608149706.2261443	3	-3.258333444595337
1608150964.3025362	4	-4.897435665130615
1608152205.2260509	5	-2.6516129970550537
1608153457.0408247	6	-2.418181896209717
1608154711.0443826	7	-5.7622222900390625
1608155958.0259895	8	-4.248888969421387
1608157216.9975774	9	-3.200000047683716
1608158506.0820932	10	-4.223809719085693
1608159793.4409842	11	0.003225806402042508
1608161075.8547528	12	-4.0411763191223145
1608162355.253113	13	-4.80512809753418
1608163639.8352644	14	-4.117391109466553
1608164902.9636772	15	-4.413888931274414
1608166174.9552836	16	-5.228302001953125
1608167476.612163	17	0.8355555534362793
1608168716.8676765	18	-2.515909194946289
1608169912.063891	19	-3.2147059440612793
1608171104.5356672	20	-1.9204081296920776
1608172299.0561368	21	0.6000000238418579
1608173498.2892644	22	-1.6925926208496094
1608174690.3900366	23	0.7733333110809326
1608175882.1601079	24	3.140000104904175
1608177064.0327203	25	0.7200000286102295
1608178251.2944398	26	4.567500114440918
1608179402.0782042	27	3.238297939300537
1608180562.6539204	28	1.1147059202194214
1608181735.4957855	29	-0.2142857164144516
1608182913.1709864	30	3.6857142448425293
1608184079.8849175	31	1.6269230842590332
1608185246.2284198	32	3.3176469802856445
1608186399.7549758	33	2.003333330154419
1608187560.1238294	34	5.548936367034912
1608188724.0120735	35	5.872340202331543
1608189868.0675075	36	5.021212100982666
1608191316.087372	37	5.402500152587891
1608192809.6529667	38	5.514814853668213
1608194283.7361073	39	3.3315789699554443
1608195732.9704757	40	4.644117832183838
1608197174.9001637	41	7.9311113357543945
1608198611.2542405	42	5.4666666984558105
1608200038.196236	43	5.78000020980835
1608201470.7424567	44	10.225000381469727
1608202895.9439375	45	6.39722204208374
1608204331.3935208	46	6.681250095367432
1608205746.7532845	47	12.223333358764648
1608207187.928053	48	9.118182182312012
1608208616.5129764	49	10.529999732971191
1608210049.0663784	50	13.017021179199219
1608211505.8531942	51	8.834615707397461
1608212974.088339	52	11.970833778381348
1608214442.5033164	53	13.872727394104004
1608215877.3149416	54	13.470833778381348
1608217324.7461338	55	11.430435180664062
1608218763.206011	56	12.105405807495117
1608220185.7724142	57	17.16111183166504
1608221607.874398	58	14.918367385864258
1608223039.189105	59	12.209755897521973
1608224464.7280896	60	16.376087188720703
1608225902.4282203	61	12.817777633666992
1608227337.1482437	62	13.94186019897461
1608228800.807696	63	12.802778244018555
1608230235.3840704	64	15.481818199157715
1608231667.0905814	65	12.127083778381348
1608233122.2263658	66	14.495454788208008
1608234575.5365167	67	14.175609588623047
1608236028.6760447	68	16.890243530273438
1608237462.756888	69	16.566667556762695
1608238933.9203684	70	11.523529052734375
1608240407.9885	71	14.965909004211426
1608241885.1440837	72	11.268965721130371
1608243322.8178709	73	12.855999946594238
1608244768.6788456	74	16.78095245361328
1608246226.2560859	75	15.053191184997559
1608247680.7890084	76	15.429166793823242
1608249128.316581	77	9.506451606750488
1608250550.7859797	78	0.14000000059604645
1608251959.1311564	79	15.314285278320312
1608253372.862894	80	11.507407188415527
1608254776.4824517	81	15.933333396911621
1608256213.80296	82	15.797825813293457
1608257642.9794228	83	13.70714282989502
1608259104.8736415	84	11.896666526794434
1608260556.0853322	85	15.648979187011719
1608262002.1333585	86	14.465116500854492
1608263478.820743	87	16.840476989746094
1608264962.354541	88	15.34000015258789
1608266449.9684074	89	15.468889236450195
1608267927.4168189	90	15.940425872802734
1608269401.69119	91	15.166666984558105
1608270881.022335	92	16.593181610107422
1608272347.8328998	93	19.8804874420166
1608273800.2016082	94	18.924137115478516
1608275255.4145722	95	12.590624809265137
1608276734.137118	96	17.116071701049805
1608278234.40636	97	12.283333778381348
1608279676.6782992	98	19.792306900024414
1608281063.1138973	99	18.397674560546875
