# Supplementary material
Source: ML conference proceedings conference paper supplement (https://proceedings.mlr.press/v139/rahman21a.html)
Supplement: Supplementary file 3 [file rahman21a-supp.zip › ICMLSupportingDoc 2/Visualization/OpenFortAttackRes/TRAIN/GPL/run-uayijodpyi-tag-Rewards_train_set.csv]

Wall time	Step	Value
1608145966.5231133	0	-4.148148059844971
1608147224.361031	1	-4.124390125274658
1608148485.313611	2	-4.67380952835083
1608149758.2317	3	-3.4472222328186035
1608151028.669683	4	-3.5
1608152300.1945438	5	-2.361764669418335
1608153564.2842135	6	-4.0688886642456055
1608154817.719915	7	-5.293749809265137
1608156074.344342	8	-3.2959184646606445
1608157339.5797129	9	-4.773684024810791
1608158618.6773639	10	-4.917646884918213
1608159820.5614142	11	-5.576470375061035
1608161029.850634	12	-4.054285526275635
1608162211.8579667	13	-4.960000038146973
1608163410.2356672	14	-2.633333444595337
1608164595.2178998	15	-4.33170747756958
1608165770.4592562	16	-2.4317073822021484
1608166975.5405972	17	-3.5829267501831055
1608168178.4726143	18	-4.437142848968506
1608169372.121084	19	-1.1843750476837158
1608170579.4240894	20	-3.2333333492279053
1608171783.084051	21	-2.581818103790283
1608172986.2606063	22	-0.699999988079071
1608174194.1201713	23	-2.189655065536499
1608175406.3099103	24	3.0471699237823486
1608176606.7758038	25	0.1733333319425583
1608177765.2057846	26	1.9161289930343628
1608178939.4367974	27	1.4108108282089233
1608180111.2335582	28	3.640000104904175
1608181282.0819247	29	1.6827585697174072
1608182443.33805	30	3.1510205268859863
1608183612.255413	31	4.290244102478027
1608184782.9817476	32	3.6640000343322754
1608185946.8304472	33	7.05555534362793
1608187114.0228577	34	2.376190423965454
1608188280.5018783	35	0.9027777910232544
1608189440.1445904	36	2.6579999923706055
1608190775.1112747	37	4.43137264251709
1608192284.290878	38	3.2653846740722656
1608193790.6001654	39	3.5060606002807617
1608195285.8710442	40	4.567741870880127
1608196772.7364917	41	4.629032135009766
1608198265.7316158	42	3.3935484886169434
1608199739.3887446	43	6.693181991577148
1608201225.4775426	44	6.397777557373047
1608202708.6259632	45	7.323999881744385
1608204185.6931171	46	6.513513565063477
1608205633.1076336	47	7.961111068725586
1608207096.1881526	48	9.313207626342773
1608208552.0409417	49	9.6096773147583
1608209988.0209074	50	4.933333396911621
1608211444.4797616	51	13.510638236999512
1608212911.430511	52	9.024999618530273
1608214359.7264323	53	9.513333320617676
1608215816.387391	54	11.585416793823242
1608217278.5677435	55	5.7617645263671875
1608218713.9123883	56	11.489130020141602
1608220157.0408316	57	11.559574127197266
1608221589.6639931	58	10.975000381469727
1608223027.5849223	59	11.899999618530273
1608224450.6680589	60	9.530434608459473
1608225870.2858028	61	11.020000457763672
1608227305.1087193	62	11.581131935119629
1608228763.095731	63	13.100000381469727
1608230198.52293	64	15.550943374633789
1608231634.2326424	65	16.672412872314453
1608233079.5129514	66	11.736169815063477
1608234532.1693313	67	9.352777481079102
1608235987.1289976	68	16.99464225769043
1608237429.1392648	69	12.727999687194824
1608238896.827022	70	13.535555839538574
1608240385.8030722	71	15.212499618530273
1608241846.6562088	72	17.337209701538086
1608243321.8313253	73	18.219444274902344
1608244746.310673	74	15.65128231048584
1608246201.3169115	75	13.046428680419922
1608247665.096729	76	17.30476188659668
1608249117.7433822	77	15.211363792419434
1608250535.0133443	78	14.065909385681152
1608251938.2870286	79	15.60952377319336
1608253336.696541	80	8.699999809265137
1608254733.5254993	81	13.04444408416748
1608256155.9982932	82	10.653124809265137
1608257583.9628437	83	16.69130516052246
1608259027.9416637	84	17.63793182373047
1608260461.7497919	85	16.975000381469727
1608261902.9247863	86	15.589362144470215
1608263356.6083875	87	13.118749618530273
1608264769.8332725	88	15.984782218933105
1608266198.1273882	89	15.981578826904297
1608267633.410384	90	15.728204727172852
1608269081.418117	91	15.779069900512695
1608270549.1371639	92	14.202174186706543
1608271997.7643025	93	13.64693832397461
1608273462.056004	94	13.649999618530273
1608274939.0064073	95	14.439535140991211
1608276428.4520922	96	17.684091567993164
1608277925.228849	97	15.478723526000977
1608279406.0916204	98	15.554545402526855
1608280846.906569	99	15.763636589050293
