# Supplementary material
Source: ML conference proceedings conference paper supplement (https://proceedings.mlr.press/v139/rahman21a.html)
Supplement: Supplementary file 3 [file rahman21a-supp.zip › ICMLSupportingDoc 2/Visualization/OpenFortAttackRes/TRAIN/GPL/run-yizhipnhxk-tag-Rewards_train_set.csv]

Wall time	Step	Value
1608145973.568087	0	-6.054999828338623
1608147252.2923226	1	-4.523404121398926
1608148515.4911957	2	-5.976315975189209
1608149740.2732623	3	-4.550000190734863
1608150962.8677983	4	-2.6657893657684326
1608152192.7145824	5	-4.5171427726745605
1608153428.3599455	6	-4.150000095367432
1608154656.7463856	7	-2.8975610733032227
1608155915.3358915	8	-3.758974313735962
1608157154.348976	9	-2.623076915740967
1608158394.215573	10	-2.695744752883911
1608159657.0750916	11	-3.1741936206817627
1608160921.7784522	12	-4.793548583984375
1608162189.0544455	13	-2.4375
1608163460.1539435	14	-4.314815044403076
1608164708.8149958	15	-1.729629635810852
1608165920.4801571	16	-1.043396234512329
1608167136.6375375	17	-3.7195122241973877
1608168337.2243369	18	-2.507499933242798
1608169566.1282504	19	-3.0824999809265137
1608170764.346762	20	0.706818163394928
1608171965.5202942	21	-3.115000009536743
1608173189.8365397	22	-1.5942307710647583
1608174396.5681589	23	1.2599999904632568
1608175572.4114156	24	0.5406249761581421
1608176771.586994	25	0.8428571224212646
1608177952.4804487	26	2.789743661880493
1608179141.279893	27	-1.0176470279693604
1608180334.3766344	28	0.4722222089767456
1608181538.7063606	29	-1.0972222089767456
1608182717.6059823	30	-1.4214285612106323
1608183918.7598715	31	-0.31224489212036133
1608185094.7305512	32	-0.36000001430511475
1608186285.3354313	33	1.8686274290084839
1608187457.7078202	34	3.758490562438965
1608188606.2067578	35	2.28484845161438
1608189760.4335978	36	3.651428461074829
1608191225.3315997	37	1.7897435426712036
1608192780.6541774	38	3.886666774749756
1608194318.1145089	39	-3.3687500953674316
1608195822.8146172	40	4.342424392700195
1608197342.813486	41	3.760526418685913
1608198854.6878111	42	6.214285850524902
1608200393.79841	43	7.11904764175415
1608201937.6363115	44	2.7083332538604736
1608203470.3482969	45	6.887499809265137
1608204980.8764446	46	4.868518352508545
1608206487.7316513	47	9.937777519226074
1608207983.220841	48	7.503333568572998
1608209463.1214821	49	8.405881881713867
1608210953.0831218	50	13.269230842590332
1608212444.2679894	51	8.961111068725586
1608213939.5581439	52	9.088234901428223
1608215395.8804069	53	12.851020812988281
1608216868.7668731	54	10.647916793823242
1608218337.8502333	55	7.486956596374512
1608219780.41807	56	12.146666526794434
1608221241.0371149	57	13.534090995788574
1608222690.4276834	58	10.994000434875488
1608224145.4515035	59	6.729411602020264
1608225605.541587	60	12.715384483337402
1608227075.0029662	61	11.873469352722168
1608228564.4187064	62	11.893023490905762
1608230026.6932786	63	10.21875
1608231488.5786948	64	11.390697479248047
1608232939.740436	65	10.966666221618652
1608234404.5215895	66	13.706122398376465
1608235879.3818002	67	-0.5416666865348816
1608237317.3078375	68	10.75151538848877
1608238783.1031928	69	14.9909086227417
1608240257.2216444	70	12.326666831970215
1608241734.504371	71	15.461817741394043
1608243190.1249807	72	12.69565200805664
1608244629.7669985	73	8.361538887023926
1608246079.6322978	74	10.474074363708496
1608247538.4842055	75	14.010869979858398
1608248990.1408193	76	12.6195650100708
1608250434.427322	77	11.272414207458496
1608251882.230474	78	14.797674179077148
1608253302.0906537	79	14.340425491333008
1608254700.6989138	80	12.688461303710938
1608256135.3006215	81	13.751922607421875
1608257569.6647258	82	12.27931022644043
1608259014.2271228	83	14.597674369812012
1608260433.7548995	84	14.969565391540527
1608261873.6972432	85	12.844680786132812
1608263316.4608552	86	13.100000381469727
1608264743.3985944	87	15.411538124084473
1608266148.2956834	88	17.121952056884766
1608267577.8996022	89	11.613953590393066
1608268999.26749	90	18.81944465637207
1608270448.72627	91	18.928333282470703
1608271918.2960865	92	17.81818199157715
1608273373.8560867	93	16.228260040283203
1608274832.0087504	94	15.540425300598145
1608276281.9425933	95	12.800000190734863
1608277723.8474908	96	16.61458396911621
1608279178.9527218	97	15.86744213104248
1608280606.0225081	98	14.465384483337402
1608281864.5439963	99	18.860000610351562
