# Supplementary material
Source: ML conference proceedings conference paper supplement (https://proceedings.mlr.press/v139/rahman21a.html)
Supplement: Supplementary file 3 [file rahman21a-supp.zip › ICMLSupportingDoc 2/Visualization/OpenFortAttackRes/TRAIN/LSTM-Coord-RFM/run-fvrgpsmafw-tag-Rewards_train_set.csv]

Wall time	Step	Value
1599484880.0033247	0	-5.823529243469238
1599485884.74274	1	-5.3393940925598145
1599486917.2186828	2	-6.318181991577148
1599487955.0499184	3	-5.229787349700928
1599489003.8567054	4	-5.544827461242676
1599490056.8467486	5	-7.8947367668151855
1599491107.9737442	6	-5.622222423553467
1599492150.0516076	7	-5.974999904632568
1599493204.6459162	8	-5.946666717529297
1599494261.7680535	9	-4.570000171661377
1599495303.5581279	10	-4.005405426025391
1599496341.0931964	11	-5.189473628997803
1599497390.741179	12	-4.786486625671387
1599498439.5146759	13	-6.56315803527832
1599499502.2189775	14	-7.493103504180908
1599500553.8176117	15	-2.730769157409668
1599501591.8314798	16	-4.650000095367432
1599502645.6677842	17	-4.650000095367432
1599503711.8907666	18	-4.289795875549316
1599504771.96375	19	-3.276923179626465
1599505820.2468293	20	-4.871794700622559
1599506867.5288076	21	-4.377500057220459
1599507915.8545518	22	-4.565517425537109
1599508973.813423	23	-2.1512820720672607
1599510019.8847573	24	-8.482353210449219
1599511052.4368715	25	-5.05555534362793
1599512054.1886628	26	-3.48974347114563
1599513063.1058288	27	-3.7679998874664307
1599514070.8121324	28	-6.340624809265137
1599515086.6364007	29	-3.790476083755493
1599516105.817518	30	-4.402631759643555
1599517141.1094766	31	-2.0166666507720947
1599518164.501161	32	-3.508333444595337
1599519183.4672782	33	-4.251428604125977
1599520198.7120464	34	-3.9200000762939453
1599521217.0995693	35	-2.5999999046325684
1599522238.7706618	36	-5.157142639160156
1599523280.113478	37	-4.702381134033203
1599524324.9612756	38	-2.2437500953674316
1599525361.0202396	39	-5.736666679382324
1599526407.6084316	40	-4.805714130401611
1599527447.4428349	41	-3.096428632736206
1599528495.0548575	42	-3.4340908527374268
1599529532.501828	43	-3.736666679382324
1599530577.8697355	44	-2.0055556297302246
1599531615.6647222	45	-5.684999942779541
1599532660.3703601	46	-2.578571319580078
1599533697.3065166	47	-5.440000057220459
1599534753.9663022	48	-3.7780487537384033
1599535794.5325224	49	-6.920000076293945
1599536843.1865654	50	-3.3027026653289795
1599537897.5999436	51	-3.3535714149475098
1599538946.267659	52	-2.048717975616455
1599539994.2749796	53	-3.624000072479248
1599541034.7808309	54	-3.1857142448425293
1599542070.9904807	55	-3.6448276042938232
1599543103.0701563	56	-3.872340440750122
1599544147.030029	57	-4.244736671447754
1599545186.3740842	58	-4.180952548980713
1599546216.1982079	59	-4.137499809265137
1599547259.0523052	60	-2.807317018508911
1599548301.8874578	61	-3.4277777671813965
1599549341.6477194	62	-4.238461494445801
1599550389.704105	63	-1.879487156867981
1599551431.1473446	64	-2.7604167461395264
1599552447.3362575	65	-2.4953489303588867
1599553462.02275	66	-1.350000023841858
1599554481.4214694	67	-3.69024395942688
1599555496.8945446	68	-2.3885715007781982
1599556506.5887294	69	-2.5162789821624756
1599557530.3458102	70	-1.2033333778381348
1599558560.5471272	71	-5.121212005615234
1599559598.9671795	72	-3.6108107566833496
1599560637.2649124	73	-4.218604564666748
1599561668.0633686	74	-4.784444332122803
1599562701.6804502	75	-2.6378378868103027
1599563737.5056632	76	-3.5
1599564765.670035	77	-2.520930290222168
1599565806.966868	78	-2.9255318641662598
1599566841.6161525	79	-3.588571310043335
1599567865.0869904	80	-3.1854166984558105
1599568894.992679	81	-4.645833492279053
1599569918.925177	82	-2.887500047683716
1599570940.2035785	83	-4.186110973358154
1599571962.1404493	84	-2.8790698051452637
1599572973.7532222	85	-3.1558139324188232
1599573992.2658248	86	-2.6268293857574463
1599575026.6980832	87	-3.2428572177886963
1599576058.3074331	88	-1.690740704536438
1599577088.733939	89	-2.875471591949463
1599578112.6050708	90	-1.475000023841858
1599579145.8827362	91	-2.0999999046325684
1599580177.810554	92	-2.6552631855010986
1599581214.9242296	93	-3.197499990463257
1599582246.7164443	94	-0.542553186416626
1599583267.4182446	95	-0.5305555462837219
1599584299.637984	96	-2.534883737564087
1599585328.1024394	97	-2.867647171020508
1599586332.4784703	98	-2.494285821914673
1599587165.0944538	99	-1.5176470279693604
1599587900.7902412	100	-3.5104167461395264
