# Supplementary material
Source: ML conference proceedings conference paper supplement (https://proceedings.mlr.press/v139/rahman21a.html)
Supplement: Supplementary file 3 [file rahman21a-supp.zip › ICMLSupportingDoc 2/Visualization/OpenFortAttackRes/TRAIN/LSTM-Coord-RFM/run-lziejmgxzl-tag-Rewards_train_set.csv]

Wall time	Step	Value
1599484873.6138732	0	-5.5
1599485939.4821358	1	-7.111111164093018
1599486992.8541536	2	-8.146153450012207
1599488013.5290775	3	-6.360714435577393
1599489016.6804073	4	-7.632608890533447
1599490022.1598117	5	-7.724242210388184
1599491044.9544082	6	-7.46842098236084
1599492067.2092633	7	-5.8023810386657715
1599493097.271572	8	-2.6857142448425293
1599494117.7249053	9	-5.651351451873779
1599495139.6121705	10	-2.8263158798217773
1599496162.2637327	11	-4.376315593719482
1599497187.9851925	12	-4.57608699798584
1599498208.1099982	13	-5.147826194763184
1599499225.008516	14	-4.9488372802734375
1599500244.557008	15	-2.4102563858032227
1599501264.3155751	16	-6.987179279327393
1599502279.0882335	17	-4.069767475128174
1599503292.1791103	18	-4.897674560546875
1599504299.6450522	19	-4.668889045715332
1599505309.8884518	20	-4.609375
1599506317.6079576	21	-2.7928571701049805
1599507326.4785028	22	-7.14722204208374
1599508351.598022	23	-3.812195062637329
1599509342.953772	24	-4.597560882568359
1599510340.4429803	25	-3.7765958309173584
1599511373.1187704	26	-2.4173076152801514
1599512430.2094457	27	-3.9100000858306885
1599513484.4134018	28	-2.4323530197143555
1599514527.5865579	29	-2.3399999141693115
1599515567.5225906	30	-2.740000009536743
1599516613.6401613	31	-3.1978261470794678
1599517656.9324157	32	-3.255000114440918
1599518697.0596302	33	-2.8774194717407227
1599519749.4343183	34	-3.3657894134521484
1599520817.6440701	35	-2.5441861152648926
1599521876.879098	36	-4.1192307472229
1599522908.7224822	37	-2.5363636016845703
1599523925.1486623	38	-3.456756830215454
1599524943.2896848	39	-4.913157939910889
1599525967.3743906	40	-4.444736957550049
1599526981.4743419	41	-4.743902206420898
1599528007.1453328	42	-4.586538314819336
1599529020.4699123	43	-5.632143020629883
1599530056.7147634	44	-1.03125
1599531092.0600383	45	-3.4529411792755127
1599532114.727111	46	-3.5958333015441895
1599533146.3467286	47	-3.7066667079925537
1599534191.7554853	48	-3.3128204345703125
1599535221.2815862	49	-3.403921604156494
1599536253.6381698	50	-4.814634323120117
1599537277.1724906	51	-3.1189188957214355
1599538296.5301924	52	-7.618750095367432
1599539319.9917834	53	-2.5428571701049805
1599540344.5456922	54	-3.187804937362671
1599541361.0787132	55	-4.125640869140625
1599542373.9509988	56	-1.3777778148651123
1599543377.7551627	57	-2.7472221851348877
1599544372.3362157	58	-6.991666793823242
1599545378.0615394	59	-1.2454545497894287
1599546379.0692258	60	-2.140000104904175
1599547365.460861	61	-2.2833333015441895
1599548356.1726649	62	-1.5714285373687744
1599549350.5306878	63	-1.5820512771606445
1599550347.8553276	64	-3.328125
1599551337.4829788	65	-0.9399999976158142
1599552335.5407076	66	-4.681081295013428
1599553349.8149402	67	-2.4700000286102295
1599554365.0957613	68	-2.7793102264404297
1599555372.0760157	69	-3.3363635540008545
1599556388.04252	70	-4.491666793823242
1599557398.1003017	71	-2.9000000953674316
1599558394.519815	72	-6.366666793823242
1599559374.603118	73	-3.7926828861236572
1599560363.4227426	74	-3.4937500953674316
1599561349.8063025	75	-3.7206897735595703
1599562339.8951774	76	-2.1342105865478516
1599563325.2292247	77	-2.1564102172851562
1599564313.6528196	78	-4.442592620849609
1599565310.0816958	79	-4.07619047164917
1599566302.695026	80	-5.080434799194336
1599567300.4095025	81	-0.9139999747276306
1599568301.2272367	82	-2.164102554321289
1599569287.098315	83	-3.5439999103546143
1599570292.4561357	84	-2.7733333110809326
1599571283.6936543	85	-0.7138888835906982
1599572273.4378812	86	-1.6033333539962769
1599573274.2709002	87	-3.683720827102661
1599574278.743432	88	-3.007499933242798
1599575255.811128	89	-4.925000190734863
1599576245.1423993	90	-1.8527777194976807
1599577237.3137147	91	-6.005555629730225
1599578250.1422405	92	-3.5736842155456543
1599579256.2508953	93	-3.578571319580078
1599580277.8511891	94	-3.235555648803711
1599581295.3935566	95	-3.5615384578704834
1599582317.0492783	96	-4.071698188781738
1599583313.1333854	97	-3.9030303955078125
1599584321.2787352	98	-4.194594383239746
1599585331.1456332	99	-2.725581407546997
1599586287.852377	100	-2.5487804412841797
