# Supplementary material
Source: ML conference proceedings conference paper supplement (https://proceedings.mlr.press/v139/rahman21a.html)
Supplement: Supplementary file 3 [file rahman21a-supp.zip › ICMLSupportingDoc 2/Visualization/OpenFortAttackRes/TRAIN/LSTM-Coord-RFM/run-mjglmbgwwp-tag-Rewards_train_set.csv]

Wall time	Step	Value
1599484876.9975615	0	-7.8128204345703125
1599485921.081993	1	-7.13095235824585
1599486982.8480055	2	-6.307894706726074
1599488036.499091	3	-8.30638313293457
1599489111.4890695	4	-4.920000076293945
1599490184.3571768	5	-6.584210395812988
1599491246.4592168	6	-5.730000019073486
1599492315.5968027	7	-6.592682838439941
1599493380.8773148	8	-2.9696969985961914
1599494447.755675	9	-7.051281929016113
1599495511.3513405	10	-5.17575740814209
1599496575.6707666	11	-6.536841869354248
1599497639.9948297	12	-4.794871807098389
1599498707.7398524	13	-6.834210395812988
1599499785.086671	14	-6.6210527420043945
1599500852.2206945	15	-3.1794116497039795
1599501919.499192	16	-2.2837836742401123
1599502997.4235294	17	-2.762500047683716
1599504075.945402	18	-6.544444561004639
1599505134.610382	19	-7.8466668128967285
1599506206.3204165	20	-2.663888931274414
1599507274.8046126	21	-4.346153736114502
1599508342.2587578	22	-4.0241379737854
1599509432.8820791	23	-3.5428571701049805
1599510500.847007	24	-4.107692241668701
1599511531.26218	25	-8.912500381469727
1599512547.4297323	26	-3.803030252456665
1599513571.805388	27	-3.9105262756347656
1599514601.8656309	28	-4.464102745056152
1599515622.6317656	29	-4.650000095367432
1599516649.0765588	30	-2.797222137451172
1599517683.5200357	31	-3.229032278060913
1599518708.6443465	32	-3.3658535480499268
1599519719.1106172	33	-4.300000190734863
1599520725.321707	34	-3.1741936206817627
1599521741.8373299	35	-4.846153736114502
1599522773.0492141	36	-1.7282050848007202
1599523819.2161689	37	-4.587804794311523
1599524860.2667346	38	-2.0374999046325684
1599525892.4629533	39	-3.918750047683716
1599526935.9086592	40	-2.0538461208343506
1599527973.951318	41	-3.9972221851348877
1599529020.8144956	42	-2.4058823585510254
1599530069.6334925	43	-4.5707316398620605
1599531110.9908462	44	-2.4288461208343506
1599532164.92585	45	-3.861363649368286
1599533201.5370328	46	-0.7720000147819519
1599534236.3278322	47	-4.788235187530518
1599535294.0348845	48	-0.6035714149475098
1599536328.2030537	49	-1.7000000476837158
1599537374.2535303	50	-3.5044443607330322
1599538428.1107054	51	-4.453488349914551
1599539471.932215	52	-2.695918321609497
1599540501.7496223	53	-5.28000020980835
1599541545.6773798	54	-2.2590909004211426
1599542592.8009102	55	-2.017948627471924
1599543639.9169278	56	-2.2717947959899902
1599544685.7407572	57	-1.0792453289031982
1599545726.9105582	58	-3.3634145259857178
1599546775.0066605	59	-1.907692313194275
1599547824.614937	60	-0.36666667461395264
1599548880.6174855	61	-4.219047546386719
1599549924.5608969	62	-3.0
1599550973.7332766	63	-1.1448979377746582
1599552027.8370266	64	-2.0510637760162354
1599553076.466344	65	-2.18461537361145
1599554112.9028587	66	-2.164285659790039
1599555143.888761	67	-2.6741936206817627
1599556192.8536074	68	-2.4901959896087646
1599557224.235684	69	-3.1317074298858643
1599558273.5078628	70	-1.3733333349227905
1599559340.1515267	71	-1.6090909242630005
1599560401.7782288	72	-1.125
1599561454.5270634	73	-3.0
1599562501.4339924	74	-3.2727272510528564
1599563546.003787	75	-2.746511697769165
1599564590.5272925	76	-3.502380847930908
1599565645.1110823	77	-0.21063829958438873
1599566692.8134758	78	-6.209523677825928
1599567736.2389715	79	-2.11388897895813
1599568793.9376678	80	-1.3313724994659424
1599569844.2896647	81	-2.390909194946289
1599570894.8959842	82	-3.2488372325897217
1599571934.521755	83	-1.091489315032959
1599572967.6237187	84	-2.799999952316284
1599574000.9720213	85	-2.549999952316284
1599575044.2805946	86	-1.7743589878082275
1599576081.763941	87	-1.78125
1599577126.1469839	88	-2.2348837852478027
1599578168.7463481	89	-0.8666666746139526
1599579214.2883325	90	-2.616666555404663
1599580255.866081	91	-2.864705801010132
1599581293.0398798	92	-1.8592592477798462
1599582338.8557553	93	-0.44999998807907104
1599583391.4487188	94	-2.359090805053711
1599584438.1637328	95	-4.688571453094482
1599585474.460749	96	-3.3924999237060547
1599586479.2265472	97	-2.098275899887085
1599587354.200135	98	-1.4923076629638672
1599588136.063684	99	-4.041025638580322
1599588858.4221272	100	-0.8421052694320679
