# Supplementary material
Source: ML conference proceedings conference paper supplement (https://proceedings.mlr.press/v139/rahman21a.html)
Supplement: Supplementary file 3 [file rahman21a-supp.zip › ICMLSupportingDoc 2/Visualization/OpenFortAttackRes/TRAIN/LSTM-Coord-RFM/run-olzdkdgiiy-tag-Rewards_train_set.csv]

Wall time	Step	Value
1599484880.1395774	0	-3.6481480598449707
1599485938.0350385	1	-7.606976509094238
1599486986.4637322	2	-8.899999618530273
1599488014.7564142	3	-6.742856979370117
1599489022.3956609	4	-4.8289475440979
1599490041.0360394	5	-5.796875
1599491078.3244376	6	-6.604650974273682
1599492109.1384356	7	-6.145946025848389
1599493144.505203	8	-5.370588302612305
1599494171.1130123	9	-5.320408344268799
1599495194.631374	10	-6.420833110809326
1599496214.5076761	11	-4.383018970489502
1599497241.0317404	12	-6.217857360839844
1599498259.3407383	13	-9.255555152893066
1599499287.2504904	14	-5.7076921463012695
1599500316.8140628	15	-5.062857151031494
1599501339.6589158	16	-5.334782600402832
1599502357.61473	17	-5.474418640136719
1599503379.7270224	18	-4.205882549285889
1599504408.0657809	19	-4.223076820373535
1599505431.213857	20	-4.1314287185668945
1599506456.6134992	21	-4.087096691131592
1599507475.0569515	22	-4.035897254943848
1599508490.6861923	23	-4.92058801651001
1599509506.8028955	24	-3.6666667461395264
1599510535.3126805	25	-4.838095188140869
1599511563.251509	26	-2.76111102104187
1599512616.6012702	27	-2.258333444595337
1599513661.0401528	28	-3.1085715293884277
1599514700.1692414	29	-5.338775634765625
1599515723.9483492	30	-4.715909004211426
1599516765.9858744	31	-3.359999895095825
1599517803.7562306	32	-2.4666666984558105
1599518841.9138784	33	-4.300000190734863
1599519892.1626291	34	-4.211111068725586
1599520948.8450162	35	-5.460714340209961
1599522011.2564428	36	-3.649019718170166
1599523032.3511868	37	-3.39393949508667
1599524045.50355	38	-2.9760000705718994
1599525054.9939613	39	-4.372727394104004
1599526075.694083	40	-2.512244939804077
1599527080.6093383	41	-3.3521738052368164
1599528097.177997	42	-3.736363649368286
1599529108.3401177	43	-5.112121105194092
1599530119.1509306	44	-3.200000047683716
1599531120.6704059	45	-2.2029411792755127
1599532122.7479184	46	-4.0333333015441895
1599533126.0171592	47	-4.930232524871826
1599534127.5122933	48	-1.7736842632293701
1599535111.5815446	49	-2.8742856979370117
1599536112.6596367	50	-0.25172412395477295
1599537105.059683	51	-4.711111068725586
1599538097.6326108	52	-3.061363697052002
1599539094.8157144	53	-2.5905659198760986
1599540094.529587	54	-2.588235378265381
1599541106.88189	55	-2.047457695007324
1599542105.986965	56	-1.5399999618530273
1599543108.578509	57	-2.2799999713897705
1599544109.703374	58	-3.5171427726745605
1599545135.3536146	59	-0.49714285135269165
1599546146.4417877	60	-1.7947368621826172
1599547145.4123826	61	-3.3314285278320312
1599548153.4516268	62	-1.9140000343322754
1599549155.0409293	63	-3.4976744651794434
1599550159.9739423	64	-2.735135078430176
1599551168.567834	65	-2.1307692527770996
1599552175.0184886	66	-2.3499999046325684
1599553189.5297	67	-0.2760869562625885
1599554201.5702624	68	-4.937777996063232
1599555202.0753813	69	-1.1676470041275024
1599556204.801575	70	-2.612820625305176
1599557212.8934915	71	-2.1892857551574707
1599558218.6812687	72	-1.434883713722229
1599559188.4396756	73	-3.978947401046753
1599560172.142937	74	-2.0511112213134766
1599561146.9113295	75	-1.1166666746139526
1599562130.917447	76	-1.9463415145874023
1599563123.4188242	77	-2.015909194946289
1599564130.3019664	78	-0.9829268455505371
1599565135.5376074	79	-4.239999771118164
1599566145.3098166	80	-3.291836738586426
1599567166.454203	81	-1.5640000104904175
1599568189.6695442	82	-1.7146341800689697
1599569226.9303608	83	-2.9891304969787598
1599570240.2197132	84	-0.9037036895751953
1599571262.664096	85	-1.4964286088943481
1599572287.167935	86	-0.9882352948188782
1599573306.8163211	87	-0.4096153974533081
1599574320.7090266	88	-4.1318182945251465
1599575307.06445	89	-5.159999847412109
1599576306.3472233	90	-0.269696980714798
1599577292.8907413	91	-2.7948718070983887
1599578267.9568708	92	-2.5625
1599579248.7129729	93	-2.1388888359069824
1599580237.1936965	94	-5.580555438995361
1599581233.1871839	95	-0.2593750059604645
1599582202.76415	96	-1.1296296119689941
1599583191.29863	97	-2.8230769634246826
1599584177.814937	98	-3.060465097427368
1599585178.048214	99	-4.710526466369629
1599586158.9934504	100	-3.7041666507720947
