# Supplementary material
Source: ML conference proceedings conference paper supplement (https://proceedings.mlr.press/v139/rahman21a.html)
Supplement: Supplementary file 3 [file rahman21a-supp.zip › ICMLSupportingDoc 2/Visualization/OpenFortAttackRes/TRAIN/LSTM-Coord-RFM/run-tlvttyhxbn-tag-Rewards_train_set.csv]

Wall time	Step	Value
1599484872.979519	0	-8.319999694824219
1599485929.7884123	1	-6.918181896209717
1599486987.5389817	2	-6.394117832183838
1599488050.4327815	3	-6.635000228881836
1599489115.0945232	4	-6.65500020980835
1599490180.41104	5	-4.534482955932617
1599491238.256998	6	-6.415625095367432
1599492295.3010046	7	-4.812766075134277
1599493362.147862	8	-2.4515151977539062
1599494411.525168	9	-4.878048896789551
1599495469.049422	10	-5.584615230560303
1599496528.1414707	11	-3.903125047683716
1599497589.736904	12	-2.9700000286102295
1599498657.1180377	13	-5.913888931274414
1599499719.511611	14	-5.265217304229736
1599500782.8996458	15	-3.8770833015441895
1599501848.6072335	16	-6.468181610107422
1599502914.2776155	17	-3.440624952316284
1599503979.2468243	18	-1.8973684310913086
1599505047.214494	19	-6.557499885559082
1599506105.1617098	20	-4.216216087341309
1599507157.833317	21	-1.542307734489441
1599508220.0122097	22	-4.070000171661377
1599509290.1143093	23	-5.006666660308838
1599510349.4395843	24	-2.635999917984009
1599511373.9526684	25	-4.640625
1599512387.9875903	26	-2.475555658340454
1599513408.362483	27	-1.2588235139846802
1599514439.3513262	28	-2.8299999237060547
1599515488.7008135	29	-0.7042553424835205
1599516525.9905093	30	-3.8315789699554443
1599517560.0082412	31	-7.169230937957764
1599518582.8810046	32	-1.6124999523162842
1599519595.055365	33	-4.161224365234375
1599520595.0508153	34	-2.390322685241699
1599521603.1567924	35	-4.278788089752197
1599522620.9082325	36	-4.827907085418701
1599523653.733366	37	-3.7717392444610596
1599524701.050374	38	-3.3222222328186035
1599525720.096101	39	-2.9749999046325684
1599526753.9266958	40	-2.9636363983154297
1599527789.8228447	41	-1.457575798034668
1599528833.5168517	42	-1.4615384340286255
1599529876.259748	43	-5.452381134033203
1599530906.3850029	44	-3.4000000953674316
1599531951.880542	45	-2.9200000762939453
1599532986.5797036	46	-1.2066667079925537
1599534028.462136	47	-4.217391490936279
1599535083.4283736	48	-3.387096881866455
1599536123.0085752	49	-3.714583396911621
1599537171.52459	50	-3.4040815830230713
1599538219.1722343	51	-1.778181791305542
1599539258.207566	52	-3.1367347240448
1599540283.49607	53	-1.8419355154037476
1599541315.0515523	54	-5.833333492279053
1599542350.6141732	55	-4.8035712242126465
1599543384.069015	56	-4.372093200683594
1599544423.9599268	57	-3.444999933242798
1599545462.5055535	58	-3.6690475940704346
1599546518.6513333	59	-0.8363636136054993
1599547572.1797853	60	-2.1111111640930176
1599548634.6567445	61	-1.7333333492279053
1599549686.052743	62	-4.073333263397217
1599550747.0416102	63	-2.9931817054748535
1599551801.7100852	64	-1.9735294580459595
1599552835.1810353	65	-2.284210443496704
1599553868.9287853	66	-2.0239131450653076
1599554901.4237041	67	-0.9862068891525269
1599555939.165553	68	-0.9979591965675354
1599556963.9368758	69	-3.154838800430298
1599557994.5052357	70	-0.7243243455886841
1599559056.7692451	71	-4.626190662384033
1599560119.0407069	72	-1.7058823108673096
1599561175.8196387	73	-2.6461539268493652
1599562230.3729177	74	-3.4270269870758057
1599563284.2914662	75	-2.7925000190734863
1599564333.5299673	76	-1.7487804889678955
1599565370.5256464	77	-3.20322585105896
1599566421.9385436	78	-2.8478260040283203
1599567470.1260421	79	-4.832499980926514
1599568534.9261413	80	-0.6521739363670349
1599569585.604394	81	-0.7795454263687134
1599570644.9717503	82	-1.162162184715271
1599571694.1901338	83	-1.1428571939468384
1599572727.951384	84	-2.007999897003174
1599573759.5539062	85	-6.615384578704834
1599574793.8596237	86	-1.9049999713897705
1599575839.6789212	87	-2.665957450866699
1599576881.7159061	88	-4.928124904632568
1599577929.9400153	89	-3.7282052040100098
1599578976.685465	90	-3.535555601119995
1599580016.4581695	91	-1.7301887273788452
1599581050.7387345	92	-2.702702760696411
1599582096.6092193	93	-1.504878044128418
1599583143.2954953	94	-3.424999952316284
1599584184.2282927	95	-3.3370370864868164
1599585210.8752801	96	-2.1741936206817627
1599586234.6591728	97	-4.021276473999023
1599587130.614925	98	-3.2333333492279053
1599587954.6241329	99	-2.7864863872528076
1599588685.9264233	100	-1.5714285373687744
