# Supplementary material
Source: ML conference proceedings conference paper supplement (https://proceedings.mlr.press/v139/rahman21a.html)
Supplement: Supplementary file 3 [file rahman21a-supp.zip › ICMLSupportingDoc 2/Visualization/OpenFortAttackRes/TRAIN/LSTM-Coord-RFM/run-wutekheodf-tag-Rewards_train_set.csv]

Wall time	Step	Value
1599484884.940557	0	-5.0
1599485891.7529547	1	-8.517646789550781
1599486913.8983445	2	-7.458974361419678
1599487948.7157586	3	-8.094118118286133
1599488992.0083423	4	-5.788571357727051
1599490041.5577726	5	-8.321211814880371
1599491090.8899515	6	-5.912499904632568
1599492141.0942054	7	-7.4488372802734375
1599493184.425256	8	-4.9666666984558105
1599494221.729836	9	-3.5684211254119873
1599495256.7155437	10	-4.489999771118164
1599496297.9324524	11	-5.202777862548828
1599497345.8924255	12	-4.550000190734863
1599498392.4174743	13	-3.799999952316284
1599499448.9389694	14	-6.262499809265137
1599500496.9155328	15	-5.096875190734863
1599501540.6390843	16	-2.7899999618530273
1599502599.5154684	17	-0.623913049697876
1599503655.9180596	18	-4.5731706619262695
1599504704.7865956	19	-3.6741936206817627
1599505747.2753992	20	-5.156097412109375
1599506786.291443	21	-3.467647075653076
1599507834.6575303	22	-4.480952262878418
1599508892.8202238	23	-4.062162399291992
1599509945.801409	24	-2.875
1599510979.2404683	25	-4.762856960296631
1599511992.4724588	26	-4.7040815353393555
1599512995.942826	27	-4.844117641448975
1599514007.3049288	28	-4.819355010986328
1599515020.1693556	29	-3.9379310607910156
1599516033.9030704	30	-4.425714492797852
1599517049.4780495	31	-3.669767379760742
1599518062.9722023	32	-0.9910714030265808
1599519070.033806	33	-2.9210526943206787
1599520076.27463	34	-4.80930233001709
1599521092.5923395	35	-3.0509090423583984
1599522101.2015433	36	-3.0794870853424072
1599523130.592268	37	-2.4000000953674316
1599524172.0219607	38	-2.81333327293396
1599525203.609913	39	-3.8435897827148438
1599526235.383028	40	-1.899999976158142
1599527271.0919712	41	-2.452272653579712
1599528289.352251	42	-3.488461494445801
1599529312.815902	43	-4.566666603088379
1599530336.5412855	44	-1.6139999628067017
1599531350.017923	45	-1.1433333158493042
1599532368.5169473	46	-4.247222423553467
1599533384.8181155	47	-1.5833333730697632
1599534422.264313	48	-1.024999976158142
1599535442.84264	49	-4.393750190734863
1599536453.3445115	50	-1.0526316165924072
1599537481.2661238	51	-3.034210443496704
1599538502.6597054	52	-1.5485714673995972
1599539511.316176	53	-3.5687499046325684
1599540523.255849	54	-3.19024395942688
1599541548.5278869	55	-2.2941176891326904
1599542562.6916664	56	-3.1081080436706543
1599543597.258406	57	-2.0250000953674316
1599544628.8566444	58	-3.1027777194976807
1599545656.4453895	59	-3.2227272987365723
1599546688.281187	60	-2.3081631660461426
1599547731.1655974	61	-2.1500000953674316
1599548772.90912	62	-0.8500000238418579
1599549812.146464	63	-2.6852941513061523
1599550851.875519	64	-3.385294198989868
1599551873.0664895	65	-0.5545454621315002
1599552882.1984694	66	-2.619607925415039
1599553902.757594	67	-4.324324131011963
1599554926.0294852	68	-1.6725490093231201
1599555932.18117	69	-1.9846153259277344
1599556957.6448753	70	-1.3090908527374268
1599557987.478814	71	-4.176743984222412
1599559024.0519779	72	-2.892307758331299
1599560046.1944878	73	-3.475675582885742
1599561080.299197	74	-2.970731735229492
1599562108.4964154	75	0.5377777814865112
1599563131.5062292	76	-0.48181816935539246
1599564155.2568712	77	-2.204444408416748
1599565179.0784268	78	-2.6465516090393066
1599566202.1326988	79	-1.5
1599567228.378464	80	1.7243902683258057
1599568243.1007004	81	-5.647368431091309
1599569269.5552633	82	-2.1211538314819336
1599570293.0489974	83	-3.15813946723938
1599571310.4968488	84	-3.5208332538604736
1599572349.1082416	85	-0.2846153974533081
1599573385.3761706	86	-3.6736841201782227
1599574426.9196742	87	-1.8361701965332031
1599575481.742958	88	-3.228302001953125
1599576524.610211	89	-1.9320000410079956
1599577566.344454	90	-3.367647171020508
1599578607.7839544	91	-0.9069767594337463
1599579642.4572384	92	-3.5911765098571777
1599580681.0886686	93	-0.7900000214576721
1599581713.6441023	94	-2.0703704357147217
1599582749.6104658	95	-4.4083333015441895
1599583769.6243536	96	-1.4172413349151611
1599584786.2053754	97	-3.366666555404663
1599585804.178028	98	-2.520512819290161
1599586739.6943953	99	-3.119999885559082
1599587591.7480276	100	-6.656140327453613
