# Supplementary material
Source: ML conference proceedings conference paper supplement (https://proceedings.mlr.press/v139/rahman21a.html)
Supplement: Supplementary file 3 [file rahman21a-supp.zip › ICMLSupportingDoc 2/Visualization/OpenFortAttackRes/TRAIN/LSTM-Coord-RFM/run-ykgrrlzejs-tag-Rewards_train_set.csv]

Wall time	Step	Value
1599484877.3062153	0	-6.431818008422852
1599485937.8573244	1	-7.836842060089111
1599486987.8040016	2	-4.980487823486328
1599488032.794205	3	-9.1134614944458
1599489047.8530934	4	-7.268421173095703
1599490066.0053763	5	-7.082857131958008
1599491088.1701338	6	-6.447368621826172
1599492119.583208	7	-4.273529529571533
1599493161.5802264	8	-3.5945944786071777
1599494199.886343	9	-5.177999973297119
1599495238.6956763	10	-5.385714054107666
1599496272.6048102	11	-5.165714263916016
1599497305.013272	12	-4.376923084259033
1599498339.2494855	13	-4.9209303855896
1599499369.7155957	14	-4.870270252227783
1599500394.9124477	15	-5.25
1599501421.9666257	16	-5.385365962982178
1599502436.5298312	17	-4.443902492523193
1599503457.0025828	18	-2.405714273452759
1599504463.5042844	19	-4.6769232749938965
1599505479.4810412	20	-2.05098032951355
1599506508.5832922	21	-1.7472221851348877
1599507529.72682	22	-1.4470587968826294
1599508543.6979094	23	-2.3428571224212646
1599509540.8610778	24	-2.959259271621704
1599510550.233916	25	-3.4558823108673096
1599511590.3400934	26	-1.5656249523162842
1599512650.9458477	27	-4.81944465637207
1599513701.4645956	28	-1.5789474248886108
1599514747.6271396	29	-4.935999870300293
1599515784.270479	30	-2.9285714626312256
1599516831.2218363	31	-2.0173912048339844
1599517882.445482	32	-1.8472222089767456
1599518921.5953152	33	-4.873529434204102
1599519986.2153518	34	-2.695744752883911
1599521050.9490926	35	-3.1655173301696777
1599522111.6135607	36	-1.7930232286453247
1599523151.3109272	37	-2.1342105865478516
1599524183.4344866	38	-2.3714284896850586
1599525226.3002987	39	-4.460975646972656
1599526271.1536558	40	-3.2488372325897217
1599527298.269169	41	-2.1459999084472656
1599528336.909684	42	-1.1711111068725586
1599529365.037999	43	-3.063636302947998
1599530380.6438615	44	-4.008571624755859
1599531396.1545737	45	-2.9954545497894287
1599532405.9630222	46	-2.1816327571868896
1599533420.2089844	47	-1.4255318641662598
1599534424.648646	48	-1.9562499523162842
1599535422.9733794	49	-5.721875190734863
1599536435.9744647	50	-3.4974358081817627
1599537450.2740397	51	-4.348837375640869
1599538469.9817028	52	-4.400000095367432
1599539490.956531	53	-3.4184210300445557
1599540512.9474037	54	-0.9692307710647583
1599541547.4773414	55	-3.3238096237182617
1599542585.232661	56	-2.6744680404663086
1599543624.507728	57	-3.9000000953674316
1599544648.684182	58	-1.8217390775680542
1599545686.1792083	59	-2.4190475940704346
1599546720.2263608	60	-3.4311110973358154
1599547739.33427	61	-2.052500009536743
1599548747.5894635	62	-3.317142963409424
1599549768.9277875	63	0.6204545497894287
1599550802.1016095	64	-3.01111102104187
1599551821.1768425	65	-0.25
1599552849.2522824	66	-1.20652174949646
1599553890.6717575	67	-3.6512820720672607
1599554939.2915561	68	-1.52765953540802
1599555972.9277842	69	-3.0575757026672363
1599557022.0848901	70	-2.852083444595337
1599558072.821345	71	-2.616279125213623
1599559113.5972965	72	-1.6460000276565552
1599560136.5755773	73	-2.5743589401245117
1599561150.144456	74	-3.5179998874664307
1599562171.2806091	75	-3.5035715103149414
1599563183.680099	76	-3.180000066757202
1599564190.2738507	77	-2.351428508758545
1599565191.4095306	78	-2.3314285278320312
1599566186.4200323	79	-3.3815789222717285
1599567200.7737072	80	-3.4564101696014404
1599568200.8218572	81	-4.813636302947998
1599569202.4370444	82	-2.1648647785186768
1599570208.6792223	83	-2.4677419662475586
1599571212.4451377	84	-4.065625190734863
1599572218.977792	85	-3.560465097427368
1599573224.113567	86	-1.2966666221618652
1599574235.791589	87	-4.065908908843994
1599575228.423955	88	-1.5692307949066162
1599576226.4598622	89	-4.256097793579102
1599577217.4966435	90	-3.2352941036224365
1599578209.0954032	91	-2.7676470279693604
1599579203.2761056	92	-3.8931033611297607
1599580199.982341	93	-3.505714178085327
1599581211.272264	94	-3.2348837852478027
1599582205.544496	95	-3.234285831451416
1599583219.2782233	96	-4.597959041595459
1599584226.148653	97	-3.1769230365753174
1599585249.3775063	98	-3.255263090133667
1599586227.0419273	99	-4.5
1599587019.0879576	100	-3.4846153259277344
