# Supplementary material
Source: ML conference proceedings conference paper supplement (https://proceedings.mlr.press/v139/rahman21a.html)
Supplement: Supplementary file 3 [file rahman21a-supp.zip › ICMLSupportingDoc 2/Visualization/OpenFortAttackRes/TRAIN/LSTM-Coord-RFM/run-yscytzuhbg-tag-Rewards_train_set.csv]

Wall time	Step	Value
1599484877.2870314	0	-5.214285850524902
1599485922.843203	1	-6.480000019073486
1599486963.629768	2	-7.328888893127441
1599488003.1233861	3	-8.073077201843262
1599489016.927763	4	-5.929999828338623
1599490041.1850188	5	-7.376923084259033
1599491067.5496979	6	-7.231372356414795
1599492082.5155125	7	-4.64390230178833
1599493109.0097826	8	-5.073913097381592
1599494123.85091	9	-4.16829252243042
1599495142.817674	10	-6.007692337036133
1599496164.1400306	11	-3.7679998874664307
1599497181.7036014	12	-6.560606002807617
1599498202.9664268	13	-4.72857141494751
1599499217.0739214	14	-2.940000057220459
1599500222.0557919	15	-6.610526084899902
1599501232.2520764	16	-4.286486625671387
1599502234.039718	17	-3.609999895095825
1599503233.7308283	18	-3.8393938541412354
1599504231.5694942	19	-3.671875
1599505239.0147552	20	-3.307499885559082
1599506243.0110338	21	-2.6059999465942383
1599507244.3198059	22	-1.3444443941116333
1599508241.6944137	23	-5.199999809265137
1599509228.6848774	24	-4.885714054107666
1599510219.8137152	25	-4.163414478302002
1599511233.2698345	26	-2.6948719024658203
1599512274.7167687	27	-4.475510120391846
1599513311.5051837	28	-7.199999809265137
1599514342.1168203	29	-1.8464285135269165
1599515360.334768	30	-3.0
1599516391.521054	31	-3.6416666507720947
1599517418.470764	32	-2.705263137817383
1599518457.0040476	33	-7.03157901763916
1599519492.2281473	34	-4.800000190734863
1599520547.6324627	35	-2.7243242263793945
1599521597.4284322	36	-2.8566038608551025
1599522635.0947	37	-2.788888931274414
1599523651.2783325	38	-5.09499979019165
1599524645.8206813	39	-4.442857265472412
1599525658.0986278	40	-5.356756687164307
1599526667.177326	41	-7.985714435577393
1599527676.9331625	42	-3.619999885559082
1599528675.1682005	43	-2.6459460258483887
1599529685.3574774	44	-3.826923131942749
1599530688.0419748	45	-0.18285714089870453
1599531676.7364311	46	-2.9864864349365234
1599532683.2641206	47	-3.143589735031128
1599533687.4701858	48	-2.0205881595611572
1599534668.6606119	49	-4.417142868041992
1599535657.8405876	50	-4.274074077606201
1599536649.550052	51	-4.025000095367432
1599537634.2713277	52	-3.692307710647583
1599538624.6481733	53	-2.5425000190734863
1599539627.857355	54	-3.9210526943206787
1599540639.323109	55	-2.7651162147521973
1599541640.2677162	56	1.0433332920074463
1599542648.8271186	57	-4.665853500366211
1599543645.4615057	58	-2.191999912261963
1599544640.0744164	59	-2.2933332920074463
1599545633.3616288	60	-2.2588236331939697
1599546619.2566922	61	-2.5962963104248047
1599547611.3207066	62	-3.2589285373687744
1599548595.7142131	63	-2.947058916091919
1599549580.3885794	64	-4.644186019897461
1599550560.7102883	65	-5.656862735748291
1599551551.3719785	66	-4.863636493682861
1599552563.02271	67	-2.594871759414673
1599553583.4975243	68	-2.0199999809265137
1599554583.8071873	69	-5.388888835906982
1599555596.948887	70	-3.465789556503296
1599556612.8709853	71	-3.8135135173797607
1599557623.387274	72	-3.5
1599558614.2770245	73	-0.9566666483879089
1599559601.9009387	74	-4.624137878417969
1599560613.7960656	75	-2.5577778816223145
1599561624.7582576	76	-2.3729166984558105
1599562630.7981884	77	-4.449999809265137
1599563639.2006812	78	-7.869999885559082
1599564651.652458	79	-2.2714285850524902
1599565673.2560937	80	-2.2142856121063232
1599566679.259476	81	-2.0
1599567680.9334521	82	-3.662222146987915
1599568668.3839357	83	-4.039999961853027
1599569668.6525757	84	-2.0727272033691406
1599570657.6866384	85	-2.878378391265869
1599571648.752214	86	-2.3350000381469727
1599572664.0470905	87	-2.444444417953491
1599573694.481687	88	-3.648780584335327
1599574733.4233823	89	-2.994736909866333
1599575782.7354105	90	-0.6155555844306946
1599576814.5918322	91	-3.933333396911621
1599577852.1100385	92	-2.549999952316284
1599578882.0572197	93	-3.5450000762939453
1599579911.1816974	94	-0.273333340883255
1599580897.2844667	95	-1.9694443941116333
1599581889.0903337	96	-4.457575798034668
1599582885.1630435	97	-2.003030300140381
1599583886.5291297	98	-1.409999966621399
1599584895.6470664	99	-3.375999927520752
1599585906.4137993	100	-3.0705883502960205
