# Supplementary material
Source: ML conference proceedings conference paper supplement (https://proceedings.mlr.press/v139/rahman21a.html)
Supplement: Supplementary file 3 [file rahman21a-supp.zip › ICMLSupportingDoc 2/Visualization/OpenFortAttackRes/TRAIN/LSTM-Coord-RFM_test/run-fvrgpsmafw-tag-Rewards_eval.csv]

Wall time	Step	Value
1599484887.7677965	0	-7.0
1599485892.5246332	1	-5.5545454025268555
1599486926.9512358	2	-6.676743984222412
1599487962.1019137	3	-5.303124904632568
1599489010.2358925	4	-2.537930965423584
1599490064.3874378	5	-5.251428604125977
1599491114.3584144	6	-3.775861978530884
1599492156.7554111	7	-4.77419376373291
1599493214.0338595	8	-2.797560930252075
1599494268.7493436	9	-5.5545454025268555
1599495309.435407	10	-7.7482757568359375
1599496350.8501987	11	-4.541999816894531
1599497397.175336	12	-5.6875
1599498449.5577743	13	-5.547826290130615
1599499511.5415373	14	-4.067441940307617
1599500560.9431143	15	-3.7058823108673096
1599501599.4708982	16	-5.256756782531738
1599502655.7909968	17	-3.1875
1599503722.3734753	18	-2.4918367862701416
1599504777.0900235	19	-6.666666507720947
1599505828.2132347	20	-2.3634145259857178
1599506876.3668897	21	-4.085714340209961
1599507926.5571973	22	-2.799999952316284
1599508985.11616	23	-3.098039150238037
1599510029.9091206	24	-3.553488254547119
1599511059.8435054	25	-2.8428571224212646
1599512058.6436663	26	-5.813333511352539
1599513070.4148247	27	-3.0868420600891113
1599514078.070736	28	-4.589189052581787
1599515095.9379601	29	-3.585106372833252
1599516115.5575724	30	-4.59761905670166
1599517151.0357437	31	-2.451111078262329
1599518169.9004555	32	-8.473684310913086
1599519195.1499195	33	-2.9207546710968018
1599520206.2108638	34	-2.6611111164093018
1599521225.5161033	35	-3.443589687347412
1599522245.9953883	36	-5.197500228881836
1599523289.696812	37	-3.575000047683716
1599524331.7753367	38	-4.130302906036377
1599525372.064831	39	-3.15744686126709
1599526414.9470172	40	-2.883871078491211
1599527454.5773184	41	-3.835294008255005
1599528501.3930163	42	-5.334482669830322
1599529544.3679311	43	-1.627450942993164
1599530584.0451066	44	-1.6541666984558105
1599531627.490248	45	-4.540740966796875
1599532666.3085747	46	-6.127999782562256
1599533705.9314353	47	-2.4564101696014404
1599534764.8173978	48	-3.95510196685791
1599535804.1304593	49	-2.1289472579956055
1599536855.2349868	50	-3.4539999961853027
1599537907.138736	51	-2.1108107566833496
1599538957.776445	52	-3.924999952316284
1599540004.068547	53	-4.596078395843506
1599541044.5924697	54	-5.285106182098389
1599542078.5958319	55	-4.718918800354004
1599543111.5368469	56	-2.5527777671813965
1599544156.8230457	57	-4.914285659790039
1599545196.6474419	58	-4.53207540512085
1599546225.0175896	59	-0.046341463923454285
1599547270.1952345	60	-2.2739131450653076
1599548307.1970022	61	-7.171428680419922
1599549350.487293	62	-5.252500057220459
1599550400.6333258	63	-3.7155556678771973
1599551442.6952286	64	-3.383018970489502
1599552453.1179779	65	-7.572000026702881
1599553469.9368896	66	-4.380000114440918
1599554488.5192075	67	-3.914705991744995
1599555503.9761736	68	-4.809091091156006
1599556516.4435182	69	-2.2325000762939453
1599557537.275723	70	-3.9468750953674316
1599558570.2831097	71	-4.07446813583374
1599559608.5608866	72	-3.8790698051452637
1599560643.60106	73	-4.442857265472412
1599561674.2639818	74	-4.304166793823242
1599562708.9916158	75	-4.531428337097168
1599563749.1915202	76	-2.46981143951416
1599564777.6774364	77	-2.885714292526245
1599565818.0169685	78	-5.072548866271973
1599566851.6367896	79	-4.212500095367432
1599567871.909202	80	-3.882758617401123
1599568902.0903015	81	-4.136842250823975
1599569926.840889	82	-2.720588207244873
1599570950.0919728	83	-4.285106182098389
1599571969.3820949	84	-2.465625047683716
1599572980.7788448	85	-3.299999952316284
1599574001.8982754	86	-3.904761791229248
1599575037.435751	87	-3.0173912048339844
1599576070.5459964	88	-3.779629707336426
1599577097.4226146	89	-4.199999809265137
1599578125.4512548	90	-2.0038461685180664
1599579152.1194112	91	-4.531034469604492
1599580188.8750777	92	-3.506122350692749
1599581224.7334023	93	-4.144186019897461
1599582254.940437	94	-3.4184210300445557
1599583277.567951	95	-2.5977272987365723
1599584308.3375242	96	-5.076595783233643
1599585334.6487813	97	-5.178124904632568
1599586341.4031405	98	-3.0208332538604736
1599587173.7200685	99	-2.4717390537261963
1599587905.3489277	100	-3.754166603088379
