# Supplementary material
Source: ML conference proceedings conference paper supplement (https://proceedings.mlr.press/v139/rahman21a.html)
Supplement: Supplementary file 3 [file rahman21a-supp.zip › ICMLSupportingDoc 2/Visualization/OpenFortAttackRes/TRAIN/LSTM-Coord-RFM_test/run-lziejmgxzl-tag-Rewards_eval.csv]

Wall time	Step	Value
1599484880.7190895	0	-8.068965911865234
1599485950.0836818	1	-5.620408058166504
1599486998.0223272	2	-8.304166793823242
1599488020.8079507	3	-7.172500133514404
1599489026.520532	4	-6.4571428298950195
1599490031.6335695	5	-5.560784339904785
1599491052.377783	6	-4.268421173095703
1599492075.9440413	7	-4.900000095367432
1599493103.5083869	8	-3.981818199157715
1599494125.5039344	9	-4.9666666984558105
1599495149.767255	10	-5.594339847564697
1599496170.3898957	11	-4.539999961853027
1599497196.0264962	12	-3.543243169784546
1599498216.6900256	13	-3.9725000858306885
1599499233.45483	14	-4.395122051239014
1599500252.5733416	15	-5.194594383239746
1599501274.2004974	16	-3.942857027053833
1599502286.8342938	17	-4.353488445281982
1599503300.28937	18	-3.447499990463257
1599504308.7837522	19	-3.351219415664673
1599505317.444166	20	-3.630000114440918
1599506325.3027287	21	-5.376315593719482
1599507334.913499	22	-2.915555477142334
1599508361.3461936	23	-3.8346939086914062
1599509350.3324928	24	-4.734285831451416
1599510347.6150587	25	-4.396666526794434
1599511379.409732	26	-1.2999999523162842
1599512440.4623709	27	-2.702380895614624
1599513496.1459203	28	-3.7581818103790283
1599514535.5346797	29	-1.7583333253860474
1599515577.8460062	30	-3.702127695083618
1599516622.022539	31	-5.17555570602417
1599517666.139745	32	-4.7707319259643555
1599518705.5438159	33	-3.6459460258483887
1599519758.7942557	34	-2.6355555057525635
1599520825.4651897	35	-6.045714378356934
1599521885.839678	36	-5.2833333015441895
1599522915.470011	37	-1.3064515590667725
1599523933.8400164	38	-4.300000190734863
1599524954.46076	39	-1.563043475151062
1599525975.057592	40	-1.892105221748352
1599526991.2859964	41	-2.481632709503174
1599528014.5026937	42	-5.208107948303223
1599529028.4984772	43	-2.3475000858306885
1599530064.409055	44	-6.22777795791626
1599531100.8139234	45	-2.183333396911621
1599532121.4852867	46	-3.731034517288208
1599533157.433223	47	-2.2811319828033447
1599534199.848142	48	-4.092105388641357
1599535226.434655	49	-6.69523811340332
1599536262.0308406	50	-2.894871711730957
1599537284.7190237	51	-1.8894736766815186
1599538306.3758137	52	-2.4777777194976807
1599539329.6597133	53	-4.131915092468262
1599540353.9147005	54	-2.7093024253845215
1599541369.3985026	55	-4.03636360168457
1599542382.1270366	56	-4.3465118408203125
1599543385.6498585	57	-5.578571319580078
1599544381.0086267	58	-2.265909194946289
1599545386.7865293	59	-4.890697479248047
1599546383.930536	60	-7.935294151306152
1599547374.56758	61	-3.2568182945251465
1599548365.3540313	62	-4.989361763000488
1599549357.7683332	63	-4.535897254943848
1599550356.4863849	64	-4.568181991577148
1599551346.243358	65	-3.645238161087036
1599552343.9959786	66	-4.685714244842529
1599553360.921529	67	-2.8638298511505127
1599554375.0757353	68	-4.312766075134277
1599555379.3789406	69	-3.396969795227051
1599556392.4259293	70	-6.0
1599557404.496645	71	-0.7433333396911621
1599558402.7586236	72	-4.5
1599559383.5437224	73	-3.1361701488494873
1599560370.7987149	74	-3.2944445610046387
1599561357.4507728	75	-4.985000133514404
1599562346.262893	76	-3.380000114440918
1599563334.547763	77	-2.3680851459503174
1599564319.8610876	78	-5.574999809265137
1599565316.7073848	79	-6.737500190734863
1599566310.2870538	80	-2.8540539741516113
1599567308.73186	81	-3.4139535427093506
1599568309.7523272	82	-4.536585330963135
1599569294.517332	83	-0.7416666746139526
1599570301.855797	84	-3.299999952316284
1599571292.6080308	85	-3.617021322250366
1599572283.7009475	86	-3.641509532928467
1599573284.6840503	87	-3.2708332538604736
1599574286.2586734	88	-1.8200000524520874
1599575265.0024266	89	-4.812244892120361
1599576252.2648797	90	-7.30555534362793
1599577246.4653158	91	-1.3642857074737549
1599578258.5236185	92	-6.365116119384766
1599579263.6998107	93	-4.354285717010498
1599580283.279638	94	-0.022727273404598236
1599581302.4489586	95	-3.268571376800537
1599582325.5538166	96	-3.269047737121582
1599583320.7125814	97	-4.122222423553467
1599584328.8629777	98	-3.9289474487304688
1599585338.4850137	99	-3.4783782958984375
1599586293.8097565	100	-4.589189052581787
