# Supplementary material
Source: ML conference proceedings conference paper supplement (https://proceedings.mlr.press/v139/rahman21a.html)
Supplement: Supplementary file 3 [file rahman21a-supp.zip › ICMLSupportingDoc 2/Visualization/OpenFortAttackRes/TRAIN/LSTM-Coord-RFM_test/run-mjglmbgwwp-tag-Rewards_eval.csv]

Wall time	Step	Value
1599484887.521242	0	-7.369565010070801
1599485931.142032	1	-4.465909004211426
1599486990.583396	2	-6.151851654052734
1599488045.9673998	3	-6.486046314239502
1599489120.3071356	4	-5.620930194854736
1599490190.974901	5	-6.611428737640381
1599491254.2945883	6	-4.205128192901611
1599492324.785104	7	-5.775609970092773
1599493390.300304	8	-4.82444429397583
1599494455.1400938	9	-5.5780487060546875
1599495519.8786163	10	-5.163636207580566
1599496584.6345625	11	-5.027272701263428
1599497646.9280727	12	-3.6529412269592285
1599498716.1310935	13	-6.693333148956299
1599499795.882963	14	-4.457446575164795
1599500861.5136254	15	-4.851162910461426
1599501927.7594228	16	-2.7969696521759033
1599503004.3602736	17	-3.460606098175049
1599504083.6180842	18	-4.39393949508667
1599505142.262966	19	-2.7472221851348877
1599506212.8697407	20	-1.6461538076400757
1599507283.7503085	21	-3.3692307472229004
1599508353.2706826	22	-2.5092592239379883
1599509441.1217077	23	-4.64390230178833
1599510508.673448	24	-4.294117450714111
1599511539.5305095	25	-4.071052551269531
1599512553.3753135	26	-6.6344828605651855
1599513579.9344292	27	-4.1028571128845215
1599514609.4435453	28	-3.950000047683716
1599515629.9154196	29	-2.880000114440918
1599516657.4880056	30	-3.0585365295410156
1599517695.1243238	31	-2.232727289199829
1599518716.762863	32	-3.3399999141693115
1599519725.096471	33	-3.948148250579834
1599520734.4799461	34	-5.384782791137695
1599521749.3881438	35	-2.935483932495117
1599522781.899661	36	-2.174999952316284
1599523826.3311467	37	-4.016129016876221
1599524867.9645252	38	-2.13611102104187
1599525899.2157857	39	-5.839473724365234
1599526941.8694725	40	-3.417241334915161
1599527980.9610772	41	-4.59375
1599529030.127992	42	-2.8692307472229004
1599530076.2049727	43	-3.673076868057251
1599531122.5335443	44	-3.091111183166504
1599532173.0269678	45	-4.578571319580078
1599533208.958504	46	-4.1424241065979
1599534246.610662	47	-5.184091091156006
1599535303.4821951	48	-2.674999952316284
1599536336.8248317	49	-4.076315879821777
1599537384.8460648	50	-2.5652174949645996
1599538436.627574	51	-3.2945945262908936
1599539480.733725	52	-5.0545454025268555
1599540510.8780587	53	-2.8487179279327393
1599541556.0645404	54	-6.387499809265137
1599542603.8074133	55	-3.2208333015441895
1599543648.3311715	56	-5.039473533630371
1599544693.3783019	57	-1.9199999570846558
1599545735.0993185	58	-4.808333396911621
1599546782.8699453	59	-4.921621799468994
1599547834.013194	60	-4.577272891998291
1599548885.6761732	61	-6.9666666984558105
1599549934.2926967	62	-3.8021275997161865
1599550982.6600716	63	-3.6815788745880127
1599552038.7676582	64	-0.41914892196655273
1599553086.4454641	65	-3.345454454421997
1599554119.3692982	66	-3.4392857551574707
1599555149.5274303	67	-5.800000190734863
1599556200.9411926	68	-4.71999979019165
1599557230.4603925	69	-3.306896448135376
1599558279.3319433	70	-2.6814815998077393
1599559348.01732	71	-4.161290168762207
1599560411.8328767	72	-3.700000047683716
1599561460.491765	73	-6.661290168762207
1599562509.405739	74	-1.5722222328186035
1599563554.0618465	75	-1.6371428966522217
1599564598.6315067	76	-3.2049999237060547
1599565655.850222	77	-3.6875
1599566701.197699	78	-3.807317018508911
1599567743.5218976	79	0.307407408952713
1599568803.778186	80	-3.5363636016845703
1599569849.3016162	81	-5.882352828979492
1599570902.7606096	82	-2.760526418685913
1599571943.4087842	83	-1.47826087474823
1599572976.9336789	84	-2.468571424484253
1599574009.3249316	85	-2.641176462173462
1599575050.4185295	86	-2.029629707336426
1599576092.3447123	87	-3.0755555629730225
1599577135.1109688	88	-2.8820512294769287
1599578175.5634387	89	-4.265517234802246
1599579224.3858316	90	-1.460869550704956
1599580265.6210475	91	-1.816216230392456
1599581300.5154185	92	-1.7354838848114014
1599582344.0730834	93	-7.514999866485596
1599583403.3894303	94	-1.6122448444366455
1599584447.2180698	95	-2.8951220512390137
1599585481.471961	96	-3.736666679382324
1599586486.2068794	97	-3.2878787517547607
1599587362.1413906	98	-4.348888874053955
1599588143.9018738	99	-1.3489795923233032
1599588865.648421	100	-1.402500033378601
