# Supplementary material
Source: ML conference proceedings conference paper supplement (https://proceedings.mlr.press/v139/rahman21a.html)
Supplement: Supplementary file 3 [file rahman21a-supp.zip › ICMLSupportingDoc 2/Visualization/OpenFortAttackRes/TRAIN/LSTM-Coord-RFM_test/run-olzdkdgiiy-tag-Rewards_eval.csv]

Wall time	Step	Value
1599484888.4047952	0	-4.69444465637207
1599485947.1178868	1	-3.611764669418335
1599486995.599776	2	-4.815789699554443
1599488025.6018643	3	-2.0360000133514404
1599489029.7599757	4	-5.43055534362793
1599490050.1824403	5	-5.508333206176758
1599491086.3695042	6	-4.826315879821777
1599492116.7128847	7	-5.617142677307129
1599493150.5540926	8	-3.390000104904175
1599494177.7506888	9	-4.913888931274414
1599495201.7051222	10	-5.178947448730469
1599496222.3718445	11	-5.069047451019287
1599497248.8337047	12	-5.181579113006592
1599498266.360795	13	-5.171428680419922
1599499298.0670345	14	-4.008695602416992
1599500322.6823385	15	-1.725000023841858
1599501347.4983237	16	-4.010526180267334
1599502364.6049519	17	-4.685714244842529
1599503391.304461	18	-2.5134615898132324
1599504414.844255	19	-3.4161291122436523
1599505438.8192596	20	-3.619999885559082
1599506462.7026634	21	-4.671428680419922
1599507486.0221407	22	-5.387754917144775
1599508497.3493507	23	-4.5933332443237305
1599509514.5775285	24	-4.663636207580566
1599510545.224899	25	-4.9708333015441895
1599511569.4926217	26	-2.019230842590332
1599512625.8097196	27	-4.512499809265137
1599513670.204368	28	-2.220930337905884
1599514706.9000714	29	-1.4914286136627197
1599515732.7426283	30	-4.638095378875732
1599516774.152162	31	-3.7324323654174805
1599517813.9069214	32	-3.7878048419952393
1599518846.7222724	33	-7.729411602020264
1599519901.2113247	34	-3.669767379760742
1599520958.7077992	35	-4.695652008056641
1599522019.6365485	36	-3.1942856311798096
1599523039.8173223	37	-4.702777862548828
1599524052.5840495	38	-4.800000190734863
1599525061.9090645	39	-3.4392857551574707
1599526086.352506	40	-4.823913097381592
1599527089.7973444	41	-3.683720827102661
1599528105.5532508	42	-3.307894706726074
1599529118.817224	43	-2.722916603088379
1599530123.4629483	44	-6.144999980926514
1599531129.1822984	45	-4.47560977935791
1599532130.8588986	46	-4.422222137451172
1599533133.345653	47	-4.785294055938721
1599534134.1304805	48	-3.9766666889190674
1599535122.1743007	49	-3.851020336151123
1599536119.5850208	50	-4.806451797485352
1599537114.3313973	51	-5.111111164093018
1599538108.896555	52	-4.6816325187683105
1599539103.181297	53	-2.528947353363037
1599540105.4312189	54	-4.77142858505249
1599541117.4731522	55	-2.701960802078247
1599542113.6271992	56	-3.996969699859619
1599543116.279563	57	-1.3783783912658691
1599544116.849672	58	-4.828125
1599545144.7620802	59	-4.077777862548828
1599546153.5226471	60	-3.2387096881866455
1599547155.4443135	61	-4.581632614135742
1599548162.0128138	62	-5.537499904632568
1599549162.4233794	63	-6.121428489685059
1599550166.3967266	64	-6.080555438995361
1599551177.146064	65	-5.137209415435791
1599552185.3124793	66	-4.133333206176758
1599553197.4610481	67	-4.486842155456543
1599554209.1504364	68	-4.952940940856934
1599555210.3513424	69	-3.9052631855010986
1599556211.5091617	70	-4.43030309677124
1599557224.2540317	71	-2.3681817054748535
1599558226.1865284	72	-2.846874952316284
1599559197.3545675	73	-4.214893817901611
1599560180.905668	74	-5.32619047164917
1599561154.5506566	75	-3.813793182373047
1599562137.4857914	76	-0.8999999761581421
1599563135.1622784	77	-1.2719999551773071
1599564138.6958625	78	-4.741860389709473
1599565146.8949378	79	-3.5333333015441895
1599566154.190617	80	-3.307894706726074
1599567174.3260498	81	-4.405714511871338
1599568198.8077295	82	-2.351428508758545
1599569236.4682863	83	-3.0975000858306885
1599570247.4078925	84	-4.331250190734863
1599571272.2158322	85	-4.488888740539551
1599572297.3712802	86	-4.251020431518555
1599573315.7841704	87	-4.415555477142334
1599574326.8584044	88	-4.514285564422607
1599575312.9480245	89	-3.256666660308838
1599576317.472939	90	-0.5081632733345032
1599577300.7229939	91	-4.081080913543701
1599578277.598317	92	-2.531111001968384
1599579256.5579865	93	-4.167567729949951
1599580245.3259249	94	-5.391176700592041
1599581239.8678641	95	-2.5366666316986084
1599582212.8357072	96	-6.065908908843994
1599583199.3174698	97	-4.782352924346924
1599584186.6599593	98	-2.7071428298950195
1599585184.2395391	99	-4.926666736602783
1599586165.393079	100	-3.2193548679351807
