# Supplementary material
Source: ML conference proceedings conference paper supplement (https://proceedings.mlr.press/v139/rahman21a.html)
Supplement: Supplementary file 3 [file rahman21a-supp.zip › ICMLSupportingDoc 2/Visualization/OpenFortAttackRes/TRAIN/LSTM-Coord-RFM_test/run-tlvttyhxbn-tag-Rewards_eval.csv]

Wall time	Step	Value
1599484880.2311947	0	-6.9666666984558105
1599485939.7664027	1	-4.726315975189209
1599486995.0126846	2	-1.4222222566604614
1599488055.982376	3	-7.488888740539551
1599489123.2696037	4	-3.0999999046325684
1599490186.5674982	5	-6.760000228881836
1599491241.3692226	6	-6.013333320617676
1599492302.2811143	7	-2.8606059551239014
1599493369.9595556	8	-4.718918800354004
1599494419.2559733	9	-4.315151691436768
1599495475.525142	10	-4.699999809265137
1599496532.881527	11	-7.43684196472168
1599497597.3003364	12	-3.387096881866455
1599498662.5705805	13	-6.781818389892578
1599499726.9594004	14	-3.579411745071411
1599500794.9802885	15	-3.9058823585510254
1599501857.149506	16	-3.8916666507720947
1599502918.7439334	17	-6.721052646636963
1599503986.6014502	18	-4.2676472663879395
1599505057.4721024	19	-2.8533332347869873
1599506112.0829027	20	-4.730302810668945
1599507167.0970104	21	-4.411904811859131
1599508228.224584	22	-2.9277777671813965
1599509300.2294273	23	-3.65238094329834
1599510357.5473254	24	-6.414999961853027
1599511379.5225174	25	-7.057142734527588
1599512396.009251	26	-4.541025638580322
1599513415.7545052	27	-3.7266666889190674
1599514448.175262	28	-4.310256481170654
1599515496.986442	29	-4.208107948303223
1599516537.527642	30	-5.373214244842529
1599517570.4656389	31	-4.244680881500244
1599518592.0701895	32	-4.923684120178223
1599519601.0359154	33	-4.6964287757873535
1599520602.1006436	34	-2.4696969985961914
1599521608.575371	35	-7.709090709686279
1599522626.6542811	36	-7.715384483337402
1599523665.4746273	37	-1.503921627998352
1599524708.288573	38	-4.072972774505615
1599525728.4619694	39	-4.518604755401611
1599526763.6961603	40	-3.541304349899292
1599527798.9526935	41	-5.704444408416748
1599528838.5338416	42	-8.095000267028809
1599529883.3912923	43	-4.256666660308838
1599530913.9645948	44	-5.22352933883667
1599531964.3452811	45	-2.956603765487671
1599532996.4204342	46	-3.395238161087036
1599534035.806693	47	-2.2200000286102295
1599535093.7136064	48	-2.545652151107788
1599536129.374291	49	-4.111999988555908
1599537181.882932	50	-5.043749809265137
1599538227.5998976	51	-3.059999942779541
1599539264.7714655	52	-5.40645170211792
1599540289.8985713	53	-4.40645170211792
1599541325.488439	54	-5.433333396911621
1599542358.9516563	55	-4.082499980926514
1599543391.7448735	56	-3.415151596069336
1599544434.60299	57	-6.185714244842529
1599545471.7983985	58	-4.449999809265137
1599546527.2549286	59	-2.8475000858306885
1599547583.5139313	60	-2.8716981410980225
1599548642.2797396	61	-3.4758620262145996
1599549694.9891176	62	-2.71052622795105
1599550757.4357324	63	-4.8549017906188965
1599551808.6029058	64	-3.183871030807495
1599552841.6379163	65	-4.284375190734863
1599553879.160867	66	-3.8456521034240723
1599554906.4713366	67	-6.400000095367432
1599555949.4238648	68	-3.133333444595337
1599556970.3778412	69	-1.3766666650772095
1599558002.1236513	70	-6.027777671813965
1599559066.5772166	71	-3.0199999809265137
1599560127.3410354	72	-5.142857074737549
1599561183.6191955	73	-2.148484945297241
1599562240.1903734	74	-3.3090908527374268
1599563289.7306595	75	-7.110000133514404
1599564339.8629906	76	-2.325000047683716
1599565378.6763694	77	-4.7617645263671875
1599566433.8192246	78	-3.208163261413574
1599567477.9778035	79	-5.165714263916016
1599568541.4679155	80	-3.4925925731658936
1599569594.2747545	81	-6.264444351196289
1599570652.7697282	82	-4.1181817054748535
1599571701.84095	83	-5.078787803649902
1599572735.2773354	84	-4.599999904632568
1599573769.4866712	85	-3.8367347717285156
1599574801.6659513	86	-6.09354829788208
1599575846.3411255	87	-4.953125
1599576887.8784072	88	-3.299999952316284
1599577937.0602703	89	-4.832353115081787
1599578983.3630574	90	-4.110714435577393
1599580022.289305	91	-6.703845977783203
1599581059.9958634	92	-3.4711110591888428
1599582105.807709	93	-4.675609588623047
1599583151.641228	94	-3.680952310562134
1599584194.6930401	95	-2.897916555404663
1599585216.0980248	96	-6.790476322174072
1599586243.8963711	97	-3.095454454421997
1599587137.1331918	98	-4.957894802093506
1599587959.1285977	99	-4.096428394317627
1599588691.0345078	100	-3.0696969032287598
