# Supplementary material
Source: ML conference proceedings conference paper supplement (https://proceedings.mlr.press/v139/rahman21a.html)
Supplement: Supplementary file 3 [file rahman21a-supp.zip › ICMLSupportingDoc 2/Visualization/OpenFortAttackRes/TRAIN/LSTM-Coord-RFM_test/run-wutekheodf-tag-Rewards_eval.csv]

Wall time	Step	Value
1599484893.3507278	0	-7.707316875457764
1599485900.1886768	1	-5.358823299407959
1599486926.792564	2	-6.857407569885254
1599487954.846689	3	-4.921428680419922
1599489002.8671157	4	-5.164705753326416
1599490051.7821853	5	-7.0217390060424805
1599491101.0441248	6	-6.528571605682373
1599492147.9812388	7	-2.93666672706604
1599493192.6266766	8	-6.454999923706055
1599494229.3793836	9	-4.507894515991211
1599495263.66862	10	-5.4314284324646
1599496307.8854492	11	-4.0704545974731445
1599497352.1181862	12	-3.507999897003174
1599498401.9362855	13	-5.253061294555664
1599499456.52928	14	-6.30512809753418
1599500502.7454102	15	-6.074999809265137
1599501546.7064266	16	-9.321739196777344
1599502607.3333588	17	-5.586111068725586
1599503662.1150029	18	-5.277777671813965
1599504712.2246761	19	-2.6057143211364746
1599505754.710139	20	-4.522857189178467
1599506797.3875728	21	-3.075000047683716
1599507842.4551172	22	-3.9538462162017822
1599508901.262686	23	-3.457894802093506
1599509954.2188761	24	-3.509999990463257
1599510988.446428	25	-4.758695602416992
1599511997.8825903	26	-4.758333206176758
1599513006.2329822	27	-3.156818151473999
1599514015.771383	28	-4.4488372802734375
1599515027.5600047	29	-4.330555438995361
1599516041.3793252	30	-4.5676469802856445
1599517059.566404	31	-5.676000118255615
1599518072.394572	32	-3.9106383323669434
1599519078.7241392	33	-4.99302339553833
1599520084.9573185	34	-4.465000152587891
1599521098.6676528	35	-5.1310343742370605
1599522107.2461493	36	-3.408695697784424
1599523141.1032972	37	-4.01086950302124
1599524182.0781898	38	-4.910869598388672
1599525214.8828516	39	-2.0893616676330566
1599526247.0997374	40	-2.1480000019073486
1599527279.863727	41	-5.430769443511963
1599528297.08062	42	-2.7135136127471924
1599529321.8129716	43	-3.0444445610046387
1599530342.0877366	44	-6.464000225067139
1599531356.7745726	45	-2.4964284896850586
1599532379.120992	46	-3.1416666507720947
1599533391.36038	47	-2.3535714149475098
1599534433.0416887	48	-2.659090995788574
1599535450.0703137	49	-4.151351451873779
1599536463.094552	50	-3.089130401611328
1599537489.514987	51	-2.5567567348480225
1599538511.620787	52	-1.2567567825317383
1599539519.818171	53	-3.125
1599540532.2790978	54	-5.192307472229004
1599541558.1518404	55	-3.799999952316284
1599542574.6136227	56	-2.3764705657958984
1599543607.0866315	57	-2.4871795177459717
1599544635.453183	58	-4.444827556610107
1599545665.621871	59	-2.8404762744903564
1599546698.4311168	60	-5.374467849731445
1599547740.1967556	61	-0.30263158679008484
1599548783.1980612	62	-4.402083396911621
1599549821.0153759	63	-4.012820720672607
1599550863.035629	64	-3.9094340801239014
1599551878.3676784	65	-5.452381134033203
1599552893.5769503	66	-3.104081630706787
1599553910.3136475	67	-3.0416667461395264
1599554933.818651	68	-1.2400000095367432
1599555943.753963	69	-3.481250047683716
1599556966.2786555	70	-3.7333333492279053
1599557998.8349519	71	-2.5145833492279053
1599559031.726774	72	-2.1085715293884277
1599560056.5256488	73	-0.782608687877655
1599561089.1871974	74	-2.705263137817383
1599562115.960831	75	-3.8027777671813965
1599563141.5286703	76	-1.9555555582046509
1599564162.5512097	77	-4.305882453918457
1599565186.4952574	78	-1.79677414894104
1599566210.1474664	79	-1.7060606479644775
1599567235.6524594	80	-2.503124952316284
1599568253.1551592	81	-3.502173900604248
1599569278.7894523	82	-4.1976189613342285
1599570302.1989362	83	-2.0947368144989014
1599571322.5198224	84	-2.50600004196167
1599572359.3278353	85	-1.3170732259750366
1599573394.9370198	86	-2.119999885559082
1599574435.880303	87	-3.516216278076172
1599575489.2239962	88	-5.114706039428711
1599576531.6942677	89	-3.8441176414489746
1599577575.1034842	90	-3.7170732021331787
1599578616.9653232	91	-2.794736862182617
1599579652.539054	92	-2.804255247116089
1599580686.3196862	93	-6.359090805053711
1599581719.7188942	94	-2.3111112117767334
1599582755.694144	95	-4.757143020629883
1599583775.0067098	96	-6.513636589050293
1599584794.6546593	97	-5.143589973449707
1599585814.4242094	98	-3.2020833492279053
1599586744.3814101	99	-6.824999809265137
1599587598.541666	100	-2.933333396911621
