# Supplementary material
Source: ML conference proceedings conference paper supplement (https://proceedings.mlr.press/v139/rahman21a.html)
Supplement: Supplementary file 3 [file rahman21a-supp.zip › ICMLSupportingDoc 2/Visualization/OpenFortAttackRes/TRAIN/LSTM-Coord-RFM_test/run-ykgrrlzejs-tag-Rewards_eval.csv]

Wall time	Step	Value
1599484883.5296838	0	-7.199999809265137
1599485943.509041	1	-7.277777671813965
1599486996.0478687	2	-5.122857093811035
1599488040.5093346	3	-6.849999904632568
1599489054.6536129	4	-5.951351165771484
1599490068.655183	5	-6.041666507720947
1599491093.5414698	6	-6.554999828338623
1599492124.9666107	7	-7.338461399078369
1599493167.9091408	8	-4.1028571128845215
1599494205.4453838	9	-6.80384635925293
1599495245.5046804	10	-1.5611110925674438
1599496280.0321698	11	-3.241025686264038
1599497310.2500956	12	-6.769999980926514
1599498343.1213636	13	-7.164000034332275
1599499375.5565958	14	-6.131999969482422
1599500406.0958538	15	-4.505882263183594
1599501430.8441231	16	-3.6787233352661133
1599502445.1457512	17	-5.18372106552124
1599503466.5116045	18	-5.619565010070801
1599504473.3113892	19	-4.785106182098389
1599505486.4947658	20	-4.277419567108154
1599506515.9820132	21	-4.963889122009277
1599507539.4302416	22	-4.008510589599609
1599508552.5265625	23	-4.275555610656738
1599509550.414475	24	-4.527272701263428
1599510556.0264084	25	-4.2833333015441895
1599511598.2639513	26	-6.408823490142822
1599512660.145123	27	-4.38139533996582
1599513712.4728382	28	-4.9120001792907715
1599514755.0806332	29	-5.246874809265137
1599515795.2555897	30	-5.819230556488037
1599516842.0561051	31	-4.931250095367432
1599517889.877037	32	-4.781081199645996
1599518930.983258	33	-5.288636207580566
1599519993.103293	34	-5.216128826141357
1599521060.9050982	35	-2.6422221660614014
1599522120.1228912	36	-3.1102564334869385
1599523157.76428	37	-2.933333396911621
1599524192.683166	38	-3.319999933242798
1599525235.7114892	39	-4.184444427490234
1599526278.504721	40	-2.1033332347869873
1599527308.1455352	41	-4.871738910675049
1599528347.8377118	42	-2.875999927520752
1599529374.7792113	43	-3.609302282333374
1599530390.3653088	44	-3.4304347038269043
1599531405.2737951	45	-3.569767475128174
1599532413.4113765	46	-4.443243026733398
1599533427.8382456	47	-5.144444465637207
1599534432.122901	48	-4.333333492279053
1599535430.0955667	49	-0.18125000596046448
1599536441.8490863	50	-2.526923179626465
1599537457.723875	51	-3.68666672706604
1599538477.7903335	52	-4.482051372528076
1599539496.679937	53	-2.8959999084472656
1599540521.4028335	54	-4.225581169128418
1599541555.8697913	55	-3.694736957550049
1599542595.071929	56	-3.9437499046325684
1599543633.4359248	57	-3.382499933242798
1599544656.116481	58	-1.8342857360839844
1599545693.9344418	59	-4.440540313720703
1599546731.546263	60	-1.834782600402832
1599547748.5147154	61	-3.5863635540008545
1599548756.8321724	62	-4.440000057220459
1599549781.0125456	63	-3.620370388031006
1599550809.5342247	64	-3.439393997192383
1599551829.6922386	65	-4.431707382202148
1599552860.186568	66	-3.2725489139556885
1599553897.6529121	67	-3.640000104904175
1599554947.1399007	68	-4.497142791748047
1599555983.1034272	69	-3.1456520557403564
1599557029.9174018	70	-3.5333333015441895
1599558081.478941	71	-3.4785714149475098
1599559122.9112542	72	-4.293181896209717
1599560147.6117337	73	-2.1020407676696777
1599561160.612862	74	-2.1340909004211426
1599562179.3842158	75	-1.7860465049743652
1599563192.3409836	76	-3.7571427822113037
1599564198.1385534	77	-3.2171428203582764
1599565200.826269	78	-3.845454454421997
1599566196.269065	79	-5.163265228271484
1599567206.7459157	80	-1.4375
1599568206.7153487	81	-1.2640000581741333
1599569211.5989394	82	-4.916666507720947
1599570216.4953399	83	-3.957575798034668
1599571219.0103688	84	-4.306451797485352
1599572226.3337648	85	-3.5999999046325684
1599573234.713358	86	-2.9937500953674316
1599574244.627756	87	-3.671739101409912
1599575235.0567498	88	-2.672727346420288
1599576232.4231234	89	-4.235714435577393
1599577226.210619	90	-2.4295454025268555
1599578216.791213	91	-2.1081080436706543
1599579214.2936175	92	-3.0306122303009033
1599580206.6555896	93	-2.9387097358703613
1599581219.2862766	94	-5.22857141494751
1599582215.4117825	95	-4.379069805145264
1599583226.649028	96	-3.0428571701049805
1599584233.9397695	97	-2.76578950881958
1599585256.8570747	98	-2.4270269870758057
1599586230.5901213	99	-7.226666450500488
1599587027.1178806	100	-2.9208333492279053
