# Supplementary material
Source: ML conference proceedings conference paper supplement (https://proceedings.mlr.press/v139/rahman21a.html)
Supplement: Supplementary file 3 [file rahman21a-supp.zip › ICMLSupportingDoc 2/Visualization/OpenFortAttackRes/TRAIN/LSTM-Coord-RFM_test/run-yscytzuhbg-tag-Rewards_eval.csv]

Wall time	Step	Value
1599484884.1209497	0	-8.47826099395752
1599485930.5166366	1	-5.2911763191223145
1599486975.1879885	2	-4.205555438995361
1599488010.7766879	3	-5.242105484008789
1599489026.0246134	4	-5.3416666984558105
1599490053.190634	5	-2.9660000801086426
1599491074.8207586	6	-3.378124952316284
1599492092.2247987	7	-4.765217304229736
1599493117.8810885	8	-5.900000095367432
1599494132.4758077	9	-4.340540409088135
1599495152.0510159	10	-4.091304302215576
1599496172.2288132	11	-4.347368240356445
1599497189.1008158	12	-3.5382351875305176
1599498211.3577223	13	-5.030434608459473
1599499225.0790765	14	-3.808333396911621
1599500230.0171418	15	-2.870270252227783
1599501242.1184785	16	-4.517777919769287
1599502244.7577078	17	-4.8470587730407715
1599503240.9952152	18	-3.7705881595611572
1599504238.9991598	19	-3.675675630569458
1599505245.7065945	20	-4.396969795227051
1599506247.909777	21	-6.300000190734863
1599507250.9773972	22	-2.019354820251465
1599508250.5891426	23	-4.34761905670166
1599509238.2875984	24	-3.5148935317993164
1599510231.170861	25	-3.718181848526001
1599511240.163945	26	-3.0117647647857666
1599512281.873843	27	-2.7030303478240967
1599513321.323126	28	-2.240000009536743
1599514351.494505	29	-3.9083333015441895
1599515371.3381443	30	-4.1759257316589355
1599516399.0099103	31	-2.0473685264587402
1599517429.9254375	32	-2.240000009536743
1599518464.1454985	33	-3.132352828979492
1599519500.6502497	34	-3.430000066757202
1599520557.1066356	35	-3.4702701568603516
1599521608.7634423	36	-4.567307472229004
1599522646.048292	37	-4.753846168518066
1599523657.4008822	38	-3.7037036418914795
1599524654.9657743	39	-4.441860675811768
1599525669.5664322	40	-4.41454553604126
1599526677.3139243	41	-4.808510780334473
1599527685.2158997	42	-4.348837375640869
1599528686.6532898	43	-4.969230651855469
1599529692.366491	44	-3.168750047683716
1599530695.1434407	45	-6.297222137451172
1599531689.532462	46	-2.4749999046325684
1599532694.482544	47	-2.0
1599533697.3388698	48	-2.573913097381592
1599534675.7978325	49	-3.1513514518737793
1599535665.7201586	50	-4.67575740814209
1599536654.7233555	51	-7.01578950881958
1599537644.6182265	52	-2.357142925262451
1599538633.4709086	53	-2.2714285850524902
1599539635.525251	54	-2.994285821914673
1599540650.377657	55	-2.7979166507720947
1599541652.4067633	56	-3.3196427822113037
1599542659.0471902	57	-2.395744562149048
1599543653.8110492	58	-4.315384387969971
1599544648.6146429	59	-3.305405378341675
1599545641.6844509	60	-4.747619152069092
1599546627.9591458	61	-4.599999904632568
1599547619.534897	62	-3.617500066757202
1599548601.931767	63	-2.4103448390960693
1599549586.5708437	64	-4.949999809265137
1599550567.7088566	65	-2.332352876663208
1599551562.4858096	66	-2.681999921798706
1599552569.986819	67	-0.9064516425132751
1599553590.7469146	68	-4.878125190734863
1599554594.119817	69	-2.4200000762939453
1599555606.1227098	70	-3.2452380657196045
1599556618.1862876	71	-6.482608795166016
1599557630.894648	72	-4.685365676879883
1599558623.092539	73	-2.169767379760742
1599559610.4354422	74	-3.682857036590576
1599560621.1074448	75	-3.1131579875946045
1599561633.1919422	76	-1.548717975616455
1599562641.2440898	77	-3.5382978916168213
1599563648.0390108	78	-4.762790679931641
1599564659.10891	79	-3.734375
1599565680.256214	80	-2.9312500953674316
1599566690.1480322	81	-2.625999927520752
1599567688.7864292	82	-1.6243243217468262
1599568678.422429	83	-4.939215660095215
1599569677.6522958	84	-4.426666736602783
1599570664.7237365	85	-4.393333435058594
1599571657.327395	86	-1.5947368144989014
1599572672.3123052	87	-4.05142879486084
1599573702.0585747	88	-1.7647058963775635
1599574742.6598933	89	-4.359090805053711
1599575788.5282757	90	-6.613043308258057
1599576823.3772628	91	-3.614285707473755
1599577859.4957805	92	-3.2545454502105713
1599578891.2821295	93	-3.589130401611328
1599579917.345905	94	-2.7153847217559814
1599580904.8965917	95	-3.7513513565063477
1599581896.0470955	96	-4.884375095367432
1599582894.395407	97	-1.255555510520935
1599583891.8469815	98	-3.257692337036133
1599584906.185561	99	-5.645833492279053
1599585912.5272367	100	-2.2185184955596924
