# Supplementary material
Source: ML conference proceedings conference paper supplement (https://proceedings.mlr.press/v139/rahman21a.html)
Supplement: Supplementary file 3 [file rahman21a-supp.zip › ICMLSupportingDoc 2/Visualization/OpenFortAttackRes/TRAIN/LSTM-RFM/run-dhzkirtcio-tag-Rewards_train_set.csv]

Wall time	Step	Value
1599479032.6803212	0	-8.541666984558105
1599479862.904841	1	-6.148275852203369
1599480694.0478966	2	-4.803030490875244
1599481513.054437	3	-5.544117450714111
1599482322.0045996	4	-7.306818008422852
1599483136.079259	5	-6.340000152587891
1599483958.2674284	6	-5.790476322174072
1599484781.367921	7	-4.563889026641846
1599485596.8559487	8	-8.477272987365723
1599486402.8666837	9	-4.80294132232666
1599487211.2076728	10	-4.234615325927734
1599488026.397554	11	-4.1028571128845215
1599488844.590975	12	-5.794871807098389
1599489669.6800308	13	-3.1649999618530273
1599490488.240976	14	-4.270270347595215
1599491297.187998	15	-5.775000095367432
1599492098.8016677	16	-4.651851654052734
1599492904.1188412	17	-3.0071427822113037
1599493709.6452706	18	-0.42399999499320984
1599494521.4260545	19	-4.604255199432373
1599495328.0262635	20	-2.522857189178467
1599496132.3626373	21	-1.2970588207244873
1599496933.8450897	22	-5.532432556152344
1599497739.3316014	23	-4.182926654815674
1599498536.8105028	24	-0.5428571701049805
1599499337.0596936	25	-2.0806450843811035
1599500140.6675868	26	-6.523529529571533
1599500953.6050777	27	-2.8918919563293457
1599501773.1034255	28	-3.3533332347869873
1599502577.0023532	29	-3.856097459793091
1599503387.9143133	30	-3.285416603088379
1599504245.0810745	31	-4.42972993850708
1599505107.9358315	32	-3.5250000953674316
1599505951.4403424	33	-2.29677414894104
1599506812.3111608	34	-3.3526315689086914
1599507689.6203458	35	-3.2200000286102295
1599508561.981944	36	-4.289473533630371
1599509440.7544699	37	-2.277777671813965
1599510317.1599667	38	-4.070000171661377
1599511184.2184925	39	-1.485714316368103
1599512050.761892	40	-4.526086807250977
1599512923.7922485	41	-2.271052598953247
1599513806.5200467	42	-3.444444417953491
1599514683.7210011	43	-2.065624952316284
1599515578.371626	44	-4.692105293273926
1599516469.8900425	45	-2.9000000953674316
1599517364.9164224	46	-2.6040000915527344
1599518263.269273	47	-3.423076868057251
1599519168.7328959	48	-3.723076820373535
1599520087.2476377	49	-3.654761791229248
1599520987.7657442	50	-4.308510780334473
1599521878.136385	51	-3.8698112964630127
1599522752.6330335	52	-1.3473684787750244
1599523622.1454248	53	-3.992682933807373
1599524502.058516	54	-4.275000095367432
1599525391.5656712	55	-2.961538553237915
1599526250.931846	56	-3.3399999141693115
1599527119.0342472	57	-0.6625000238418579
1599527974.5167515	58	-3.9311110973358154
1599528822.9300349	59	-0.7157894968986511
1599529667.0589306	60	-0.33666667342185974
1599530526.8456311	61	1.0814814567565918
1599531385.3168178	62	-3.372727155685425
1599532255.8808084	63	-3.211538553237915
1599533131.924898	64	-4.236111164093018
1599533987.5364416	65	-2.1410255432128906
1599534841.5873737	66	-1.5813953876495361
1599535704.3147216	67	-0.279591828584671
1599536564.8090124	68	-2.700000047683716
1599537419.4862468	69	-2.619999885559082
1599538289.6879973	70	-1.0026315450668335
1599539148.1239383	71	-2.705263137817383
1599540002.4988108	72	-0.925000011920929
1599540847.1538787	73	-1.118181824684143
1599541695.119592	74	-4.0
1599542539.127017	75	-3.811363697052002
1599543388.6215377	76	-1.773809552192688
1599544243.7481587	77	-2.853658437728882
1599545109.0071957	78	-1.1875
1599545966.8443038	79	-1.9942857027053833
1599546845.7504709	80	-2.2750000953674316
1599547720.5802615	81	-3.648648738861084
1599548597.5279205	82	-3.307692289352417
1599549468.4387689	83	-2.52439022064209
1599550335.025538	84	-3.1205127239227295
1599551204.4614913	85	-2.859999895095825
1599552067.7389243	86	-3.9170732498168945
1599552936.6945033	87	-2.632499933242798
1599553807.3617697	88	-3.672092914581299
1599554673.5109987	89	0.8272727131843567
1599555517.7585082	90	-4.920512676239014
1599556353.4370615	91	-2.140000104904175
1599557200.5278153	92	-2.140000104904175
1599558054.363758	93	-1.625925898551941
1599558910.4186754	94	-4.548936367034912
1599559749.9319136	95	-2.1636364459991455
1599560606.126216	96	0.35957446694374084
1599561463.2129452	97	-2.1552631855010986
1599562315.5013485	98	-2.2960000038146973
1599563062.4633622	99	-0.428260862827301
1599563757.5026994	100	-2.8384616374969482
