# Supplementary material
Source: ML conference proceedings conference paper supplement (https://proceedings.mlr.press/v139/rahman21a.html)
Supplement: Supplementary file 3 [file rahman21a-supp.zip › ICMLSupportingDoc 2/Visualization/OpenFortAttackRes/TRAIN/LSTM-RFM/run-edaknggtca-tag-Rewards_train_set.csv]

Wall time	Step	Value
1599479038.2005224	0	-4.9268293380737305
1599479848.524003	1	-6.915151596069336
1599480668.063976	2	-7.658823490142822
1599481486.0785825	3	-8.890000343322754
1599482287.4987051	4	-6.697297096252441
1599483091.2644584	5	-5.536110877990723
1599483898.9638486	6	-4.233333110809326
1599484716.9119413	7	-5.65749979019165
1599485522.6691628	8	-4.722580432891846
1599486327.7334287	9	-5.978947162628174
1599487124.9302225	10	-5.980000019073486
1599487928.8365972	11	-4.811110973358154
1599488732.4057152	12	-5.043243408203125
1599489549.21059	13	-4.725714206695557
1599490366.624328	14	-4.261904716491699
1599491169.4121377	15	-9.0090913772583
1599491962.514849	16	-3.843478202819824
1599492763.6214752	17	-4.992156982421875
1599493570.591393	18	-3.606250047683716
1599494379.116597	19	-4.779069900512695
1599495179.3067203	20	-4.889473915100098
1599495974.6944072	21	-5.176743984222412
1599496773.797541	22	-4.111111164093018
1599497573.1879182	23	-3.8717949390411377
1599498363.0465147	24	-3.034210443496704
1599499150.35929	25	-3.136666774749756
1599499950.8604548	26	-4.552830219268799
1599500749.4757693	27	-2.8869564533233643
1599501544.85724	28	-4.306896686553955
1599502336.3395333	29	-2.3935484886169434
1599503135.4872453	30	-3.5250000953674316
1599503968.2960603	31	-3.0088236331939697
1599504813.0681062	32	-2.602325677871704
1599505645.649165	33	-2.2142856121063232
1599506476.5749931	34	-4.4030303955078125
1599507332.7634358	35	-6.157142639160156
1599508181.0118172	36	-3.755000114440918
1599509046.033673	37	-4.061403274536133
1599509903.2203276	38	-5.202438831329346
1599510755.8319485	39	-1.4509804248809814
1599511600.338935	40	-5.889285564422607
1599512451.7678294	41	-2.9315788745880127
1599513307.3760965	42	-2.609677314758301
1599514158.7295675	43	-2.572413682937622
1599515010.8937356	44	-2.9184210300445557
1599515883.1438792	45	-2.757446765899658
1599516747.2331326	46	-2.4878787994384766
1599517624.5840235	47	-1.8098039627075195
1599518507.4123693	48	-4.242222309112549
1599519389.483532	49	-2.582758665084839
1599520279.496464	50	-2.3333332538604736
1599521157.9507945	51	-5.107316970825195
1599522024.2949643	52	-2.8395349979400635
1599522876.0582578	53	-4.071052551269531
1599523718.324196	54	-2.8275861740112305
1599524574.8634775	55	0.014999999664723873
1599525424.404933	56	-2.9432432651519775
1599526278.2739582	57	-4.789999961853027
1599527146.888159	58	-3.4189188480377197
1599527999.4668715	59	-1.665217399597168
1599528846.4287863	60	-4.755555629730225
1599529683.422791	61	-3.7382352352142334
1599530545.346268	62	-5.228888988494873
1599531401.8720207	63	-4.595555782318115
1599532257.4857526	64	-2.9358973503112793
1599533118.434418	65	-1.7632652521133423
1599533974.6177168	66	-2.4448275566101074
1599534832.6788256	67	-3.034883737564087
1599535685.7947128	68	-3.8955554962158203
1599536532.1461198	69	-7.010000228881836
1599537393.1535373	70	0.30000001192092896
1599538262.890804	71	-2.7666666507720947
1599539115.6083927	72	-2.8880951404571533
1599539953.0009696	73	-3.3657143115997314
1599540794.4277256	74	-4.672916889190674
1599541624.674267	75	-2.4000000953674316
1599542481.8094535	76	-3.268965482711792
1599543326.1461637	77	-4.217021465301514
1599544170.1821527	78	-4.58863639831543
1599545018.0795414	79	-2.671428680419922
1599545868.5099745	80	-3.57608699798584
1599546714.7753935	81	-3.4054055213928223
1599547577.873417	82	-2.3263158798217773
1599548425.4962244	83	-4.0920000076293945
1599549268.658568	84	-3.5290322303771973
1599550107.7111862	85	-5.84499979019165
1599550942.1381109	86	-1.7791666984558105
1599551787.783543	87	-2.4129629135131836
1599552631.7469678	88	-3.366666555404663
1599553468.9021297	89	-1.7127659320831299
1599554302.437986	90	-2.9146342277526855
1599555132.0260875	91	-2.0704545974731445
1599555957.168217	92	-5.0619049072265625
1599556791.4618404	93	-3.006382942199707
1599557638.4450336	94	-1.085714340209961
1599558455.6179903	95	-5.694285869598389
1599559301.0290818	96	-2.0512821674346924
1599560139.3796787	97	-3.808000087738037
1599560985.255747	98	-2.0877552032470703
1599561823.7406988	99	-1.013157844543457
1599562647.6551156	100	-3.4166667461395264
