# Supplementary material
Source: ML conference proceedings conference paper supplement (https://proceedings.mlr.press/v139/rahman21a.html)
Supplement: Supplementary file 3 [file rahman21a-supp.zip › ICMLSupportingDoc 2/Visualization/OpenFortAttackRes/TRAIN/LSTM-RFM/run-grvsjnkfrt-tag-Rewards_train_set.csv]

Wall time	Step	Value
1599479035.1429508	0	-8.255813598632812
1599479965.167767	1	-8.970833778381348
1599480894.6446567	2	-4.813953399658203
1599481824.7974472	3	-6.184999942779541
1599482754.9401987	4	-7.390244007110596
1599483696.7527971	5	-5.78157901763916
1599484633.1014702	6	-7.621951103210449
1599485568.3946166	7	-5.2166666984558105
1599486517.7012258	8	-4.360000133514404
1599487459.308494	9	-5.135000228881836
1599488397.0892234	10	-5.3027777671813965
1599489331.7898176	11	-4.463414669036865
1599490270.3521438	12	-6.136363506317139
1599491216.714146	13	-3.697561025619507
1599492159.3161347	14	-1.4500000476837158
1599493092.214836	15	-4.005263328552246
1599494029.5382085	16	-3.7714285850524902
1599494961.3304245	17	-3.4666666984558105
1599495899.469782	18	-3.340625047683716
1599496832.557611	19	-4.761111259460449
1599497765.5954018	20	-6.112903118133545
1599498700.1049051	21	-3.0999999046325684
1599499631.9813836	22	-5.013333320617676
1599500556.4730666	23	-4.400000095367432
1599501478.711543	24	-2.806666612625122
1599502401.7718053	25	-3.674999952316284
1599503320.6944656	26	-5.19487190246582
1599504216.8725853	27	-4.608333110809326
1599505086.8568718	28	-3.481818199157715
1599505972.5273962	29	-4.202325344085693
1599506845.353586	30	-6.158695697784424
1599507727.1012044	31	-3.69024395942688
1599508592.1390827	32	-3.4060606956481934
1599509454.3738277	33	-3.9727272987365723
1599510334.2793713	34	-2.6559998989105225
1599511219.376281	35	-6.699999809265137
1599512095.2652016	36	-4.104762077331543
1599512963.5303476	37	-4.2866668701171875
1599513829.500843	38	-4.127500057220459
1599514685.1600642	39	-3.7517242431640625
1599515536.5105646	40	-4.563636302947998
1599516379.1101058	41	-1.6769230365753174
1599517217.8604114	42	-3.424999952316284
1599518051.5211585	43	-4.308108329772949
1599518882.0908267	44	-3.3205883502960205
1599519693.5847204	45	-2.1741936206817627
1599520512.733593	46	-4.19444465637207
1599521355.656729	47	-1.9135135412216187
1599522198.4163642	48	-2.494285821914673
1599523058.323965	49	-1.306666612625122
1599523929.3423793	50	-2.239534854888916
1599524776.7192545	51	-2.5439999103546143
1599525630.6630013	52	-2.5166666507720947
1599526491.4076726	53	-4.222727298736572
1599527347.6701915	54	-3.9666666984558105
1599528217.0091426	55	-1.708571434020996
1599529085.1006606	56	-3.1384615898132324
1599529953.671678	57	-4.222448825836182
1599530814.733776	58	-2.7857143878936768
1599531682.3282545	59	-2.2799999713897705
1599532554.2711983	60	-2.6424999237060547
1599533428.5642269	61	-2.1295454502105713
1599534293.8671212	62	-3.2653846740722656
1599535153.761398	63	-2.4785714149475098
1599536023.493301	64	-3.1365854740142822
1599536875.4814653	65	-4.431707382202148
1599537723.480795	66	-3.3622641563415527
1599538591.2411702	67	-2.375675678253174
1599539461.0955079	68	-4.684444427490234
1599540339.1198235	69	-4.0780487060546875
1599541217.591551	70	-3.543243169784546
1599542097.0832746	71	-3.0299999713897705
1599542963.3997188	72	-3.1744680404663086
1599543835.2432635	73	-2.2153847217559814
1599544693.5164332	74	-2.305263042449951
1599545545.9812665	75	-2.2939393520355225
1599546402.2450092	76	-3.0771429538726807
1599547269.318987	77	-2.2850000858306885
1599548139.215912	78	-2.525861978530884
1599548998.6642532	79	-2.88444447517395
1599549874.7928817	80	-3.736842155456543
1599550750.8413115	81	-3.079545497894287
1599551625.7769277	82	-4.436585426330566
1599552499.3203506	83	-3.819444417953491
1599553366.838309	84	-2.6490566730499268
1599554246.293141	85	-2.015909194946289
1599555118.3605778	86	-3.9069766998291016
1599556000.3251863	87	-2.636666774749756
1599556881.7496107	88	-2.4049999713897705
1599557750.05282	89	-2.7228572368621826
1599558618.8516648	90	-2.9642856121063232
1599559482.3260732	91	-3.6023809909820557
1599560362.3481998	92	-2.4000000953674316
1599561229.2584083	93	-3.112121105194092
1599562116.2377188	94	-2.8818182945251465
1599562962.0530272	95	-4.268965721130371
1599563752.6465988	96	-2.338709592819214
1599564447.8346422	97	-2.444185972213745
1599565108.7818348	98	-2.5
1599565767.5163624	99	-1.1555556058883667
1599566429.4056675	100	-2.6325581073760986
