# Supplementary material
Source: ML conference proceedings conference paper supplement (https://proceedings.mlr.press/v139/rahman21a.html)
Supplement: Supplementary file 3 [file rahman21a-supp.zip › ICMLSupportingDoc 2/Visualization/OpenFortAttackRes/TRAIN/LSTM-RFM/run-iodbrjkxfn-tag-Rewards_train_set.csv]

Wall time	Step	Value
1599479040.210512	0	-3.5151515007019043
1599479849.0342555	1	-4.753125190734863
1599480676.5620742	2	-6.332432270050049
1599481495.0649462	3	-6.599999904632568
1599482291.9754236	4	-4.630302906036377
1599483101.4747036	5	-7.986046314239502
1599483914.3395364	6	-7.073585033416748
1599484731.4158134	7	-5.124324321746826
1599485541.0548604	8	-5.545097827911377
1599486341.5982182	9	-4.244117736816406
1599487141.4092872	10	-3.3399999141693115
1599487941.1924806	11	-5.261538505554199
1599488745.01082	12	-4.612195014953613
1599489554.576457	13	-4.480000019073486
1599490354.8436475	14	-6.010714054107666
1599491158.1679783	15	-6.378048896789551
1599491968.1754403	16	-4.712500095367432
1599492769.7341266	17	-6.25
1599493576.8063245	18	-5.081818103790283
1599494375.6118674	19	-1.1355555057525635
1599495174.197882	20	-6.125640869140625
1599495965.3555036	21	-6.190625190734863
1599496754.81101	22	-4.802439212799072
1599497562.524391	23	-5.800000190734863
1599498366.8160214	24	-7.235000133514404
1599499170.099607	25	-3.107407331466675
1599499979.5100372	26	-5.2431817054748535
1599500779.2368991	27	-5.160465240478516
1599501582.954298	28	-2.6736841201782227
1599502370.4649708	29	-2.7333333492279053
1599503171.790466	30	-0.949999988079071
1599504003.5817456	31	-5.623529434204102
1599504849.4418726	32	-4.137499809265137
1599505685.3135085	33	-2.46875
1599506517.422704	34	-3.336111068725586
1599507375.091	35	-3.50566029548645
1599508222.6362379	36	-6.715000152587891
1599509078.3282025	37	-2.299999952316284
1599509938.7384093	38	-3.968888998031616
1599510787.528225	39	-0.6888889074325562
1599511629.8668973	40	-3.221428632736206
1599512480.5276153	41	-2.8979592323303223
1599513340.7696369	42	-3.8195652961730957
1599514192.789623	43	-3.2192306518554688
1599515043.9571912	44	-2.276315689086914
1599515901.054142	45	-2.219444513320923
1599516769.6965961	46	-3.9145455360412598
1599517640.7331681	47	-4.277272701263428
1599518522.9739382	48	-1.9210525751113892
1599519399.5106328	49	-5.462500095367432
1599520290.643898	50	-1.1962963342666626
1599521154.3987353	51	-1.0545454025268555
1599522007.3674266	52	-2.859459400177002
1599522859.5093348	53	-4.009259223937988
1599523703.5137568	54	-4.558139324188232
1599524557.6468592	55	-3.042424201965332
1599525401.3766022	56	-2.707843065261841
1599526243.8484423	57	-3.7295453548431396
1599527088.1201794	58	-1.2640000581741333
1599527930.53104	59	-3.288095235824585
1599528757.2772906	60	-3.4159090518951416
1599529577.3060925	61	-1.6268292665481567
1599530424.4525163	62	-2.6028571128845215
1599531263.1759493	63	-2.7487804889678955
1599532104.356831	64	-4.202381134033203
1599532943.9335728	65	-2.942857027053833
1599533792.4284358	66	-4.027451038360596
1599534633.9381883	67	-3.1468749046325684
1599535482.9710617	68	0.4119047522544861
1599536323.6106777	69	-3.5382978916168213
1599537172.2705069	70	0.06818182021379471
1599538035.4164348	71	-3.2594594955444336
1599538870.479447	72	-3.2034482955932617
1599539701.150835	73	-3.451282024383545
1599540522.5138228	74	-2.7219512462615967
1599541358.258503	75	-2.0333333015441895
1599542201.8602166	76	-3.930612325668335
1599543049.3747814	77	-3.6465115547180176
1599543901.0554054	78	-2.517948627471924
1599544754.528904	79	-2.945945978164673
1599545607.781525	80	-2.496774196624756
1599546460.6622362	81	-4.112500190734863
1599547334.0355844	82	-1.6363636255264282
1599548188.341673	83	-3.051351308822632
1599549041.059905	84	-0.32058823108673096
1599549889.3995042	85	-2.6022727489471436
1599550731.742199	86	-1.986842155456543
1599551578.4708087	87	-1.8608695268630981
1599552430.3213553	88	-0.95652174949646
1599553275.8093207	89	-2.103703737258911
1599554118.9970074	90	-0.671875
1599554951.8396873	91	-3.5490565299987793
1599555784.670885	92	-4.102564334869385
1599556625.2843487	93	-3.3902440071105957
1599557465.0681858	94	-3.0
1599558302.728701	95	-2.7125000953674316
1599559135.6266406	96	-2.515909194946289
1599559962.433954	97	-1.14130437374115
1599560805.0329669	98	-3.7282052040100098
1599561660.2897716	99	-4.462857246398926
1599562511.7716622	100	-2.0897436141967773
