# Supplementary material
Source: ML conference proceedings conference paper supplement (https://proceedings.mlr.press/v139/rahman21a.html)
Supplement: Supplementary file 3 [file rahman21a-supp.zip › ICMLSupportingDoc 2/Visualization/OpenFortAttackRes/TRAIN/LSTM-RFM/run-ofhfdedubf-tag-Rewards_train_set.csv]

Wall time	Step	Value
1599479046.3165352	0	-6.04878044128418
1599479979.6718783	1	-4.743478298187256
1599480908.7119906	2	-7.4195122718811035
1599481835.462185	3	-6.834374904632568
1599482774.061086	4	-3.366666555404663
1599483714.9780624	5	-5.286110877990723
1599484656.4911435	6	-5.385416507720947
1599485596.705163	7	-5.95121955871582
1599486547.538061	8	-4.663829803466797
1599487485.0758443	9	-4.072916507720947
1599488423.683409	10	-4.574358940124512
1599489354.5728822	11	-4.558823585510254
1599490288.020814	12	-6.038095474243164
1599491225.539257	13	-3.2269229888916016
1599492168.6403697	14	-5.389999866485596
1599493106.4970646	15	-3.813793182373047
1599494041.3777466	16	-4.823529243469238
1599494975.2400732	17	-1.4945945739746094
1599495922.352809	18	-2.971428632736206
1599496861.0672438	19	-3.4000000953674316
1599497794.3507822	20	-3.884999990463257
1599498730.4670072	21	-3.8548386096954346
1599499660.7897482	22	-4.523255825042725
1599500592.3173854	23	-5.932692527770996
1599501508.853959	24	-4.429999828338623
1599502429.7124293	25	-4.955882549285889
1599503350.9300315	26	-3.052500009536743
1599504238.9349024	27	-2.1500000953674316
1599505114.7032695	28	-3.171875
1599506004.8310988	29	-5.002500057220459
1599506883.0516078	30	-5.820000171661377
1599507767.4157112	31	-2.9454545974731445
1599508644.416651	32	-4.910869598388672
1599509512.1860268	33	-3.262500047683716
1599510380.801942	34	-3.0035715103149414
1599511255.88815	35	-3.075000047683716
1599512130.4459188	36	-3.7121212482452393
1599512994.0452821	37	-4.7404255867004395
1599513853.0132594	38	-2.0655171871185303
1599514715.380506	39	-1.352173924446106
1599515557.0802774	40	-3.9468750953674316
1599516397.1747222	41	-4.570000171661377
1599517233.979842	42	-3.391489267349243
1599518065.8401744	43	-2.240000009536743
1599518890.370166	44	-3.6363637447357178
1599519698.1126072	45	-2.6025640964508057
1599520512.7464218	46	-2.43461537361145
1599521353.5258877	47	-4.541860580444336
1599522197.4365602	48	-4.342857360839844
1599523042.9141154	49	0.33571428060531616
1599523911.0451713	50	-3.0
1599524763.9816654	51	-3.8116278648376465
1599525626.609006	52	-0.896774172782898
1599526477.6884682	53	-3.373333215713501
1599527331.4279058	54	-1.919354796409607
1599528202.268984	55	-1.9432432651519775
1599529078.2448752	56	-2.091428518295288
1599529944.481908	57	-2.1192307472229004
1599530798.8588996	58	-2.5399999618530273
1599531669.3290374	59	-1.6066666841506958
1599532527.9043922	60	-1.769565224647522
1599533383.8854082	61	-1.889285683631897
1599534239.466691	62	-3.006382942199707
1599535099.3640313	63	-2.2750000953674316
1599535962.4208686	64	-2.6542856693267822
1599536819.9808671	65	-2.7268292903900146
1599537665.9721704	66	-3.819512128829956
1599538532.4670937	67	0.10000000149011612
1599539401.100408	68	-0.862500011920929
1599540270.6252155	69	-3.480769157409668
1599541149.7802353	70	-3.4529411792755127
1599542030.6980183	71	-1.5179487466812134
1599542896.4751337	72	-4.210000038146973
1599543765.2597978	73	-3.509523868560791
1599544621.2531555	74	-3.0416667461395264
1599545478.2592316	75	-1.7857142686843872
1599546342.5848243	76	-2.3393938541412354
1599547199.3662848	77	-3.7926828861236572
1599548055.5128424	78	-3.9941177368164062
1599548909.5554502	79	-3.567500114440918
1599549771.2590153	80	-2.1589744091033936
1599550629.0115297	81	-2.700000047683716
1599551496.8925939	82	-0.04782608523964882
1599552365.5055983	83	-1.652500033378601
1599553225.1811485	84	-3.3411765098571777
1599554098.277692	85	-4.81489372253418
1599554965.3762279	86	0.26818183064460754
1599555852.7179475	87	0.24042552709579468
1599556733.5844846	88	-2.9558823108673096
1599557601.5185251	89	-0.5
1599558470.3022697	90	-2.886486530303955
1599559332.4327936	91	-2.7245283126831055
1599560201.2526305	92	-1.4869564771652222
1599561057.1288817	93	-3.0151515007019043
1599561934.756295	94	-2.6823530197143555
1599562785.4635391	95	-4.4285712242126465
1599563565.9558144	96	-2.164705991744995
1599564305.9299443	97	-4.030612468719482
1599565021.041047	98	-3.1823530197143555
1599565736.9616466	99	-2.5333333015441895
1599566444.0879238	100	-5.444827556610107
