# Supplementary material
Source: ML conference proceedings conference paper supplement (https://proceedings.mlr.press/v139/rahman21a.html)
Supplement: Supplementary file 3 [file rahman21a-supp.zip › ICMLSupportingDoc 2/Visualization/OpenFortAttackRes/TRAIN/LSTM-RFM/run-qtldaqxlkc-tag-Rewards_train_set.csv]

Wall time	Step	Value
1599479033.6566448	0	-7.0757575035095215
1599479964.9166222	1	-5.586666584014893
1599480901.6615555	2	-8.31219482421875
1599481835.9842222	3	-7.025581359863281
1599482766.6106088	4	-5.19523811340332
1599483709.6724267	5	-6.139024257659912
1599484648.2435257	6	-4.031428337097168
1599485577.2701573	7	-6.5428571701049805
1599486523.6132424	8	-3.9941177368164062
1599487457.8591259	9	-6.613513469696045
1599488386.8850222	10	-7.7166666984558105
1599489314.551092	11	-4.9476189613342285
1599490244.246373	12	-5.113333225250244
1599491180.737865	13	-6.675675868988037
1599492120.7893562	14	-4.6032257080078125
1599493058.2630422	15	-6.815789699554443
1599493993.3293383	16	-3.312195062637329
1599494927.156644	17	-2.864000082015991
1599495873.709802	18	-3.690476179122925
1599496811.1443956	19	-3.5969696044921875
1599497740.7934132	20	-3.6875
1599498676.8064013	21	-4.252500057220459
1599499608.934063	22	-4.359459400177002
1599500535.4317906	23	-4.519999980926514
1599501466.473501	24	-6.678723335266113
1599502390.6553118	25	-4.817777633666992
1599503312.4410462	26	-4.948484897613525
1599504223.2184415	27	-3.5926828384399414
1599505140.712166	28	-0.33636364340782166
1599506054.5037506	29	-2.5696969032287598
1599506936.4592788	30	-2.060606002807617
1599507830.8489237	31	-3.982926845550537
1599508712.8559647	32	-4.183784008026123
1599509585.3972707	33	-1.35757577419281
1599510466.9885416	34	-2.605405330657959
1599511356.0238726	35	-3.347222328186035
1599512232.7570796	36	-3.9512195587158203
1599513113.4327466	37	-4.060526371002197
1599513997.2272248	38	-0.12045454233884811
1599514867.1960351	39	-4.304347991943359
1599515756.1617336	40	-1.5627450942993164
1599516649.6011045	41	-3.429166555404663
1599517549.5871656	42	-2.24399995803833
1599518448.5255384	43	-2.76285719871521
1599519353.2814293	44	-3.299999952316284
1599520266.9518385	45	-3.9179487228393555
1599521150.632251	46	-3.965853691101074
1599522027.746565	47	-5.8204545974731445
1599522912.4102159	48	-2.165384531021118
1599523775.5085013	49	-4.711111068725586
1599524653.2258377	50	-0.5196078419685364
1599525535.3505661	51	-1.4074074029922485
1599526413.1349072	52	-2.2464284896850586
1599527286.7360535	53	-2.9800000190734863
1599528159.0963304	54	-2.0162789821624756
1599529048.017111	55	-3.9673912525177
1599529930.0119848	56	-5.478947162628174
1599530824.5828805	57	-2.25
1599531715.1608	58	-5.769697189331055
1599532605.5594723	59	-3.8840909004211426
1599533469.5987422	60	-3.19024395942688
1599534341.87095	61	-4.517948627471924
1599535220.1147242	62	-3.8458333015441895
1599536093.4750016	63	-3.4342856407165527
1599536978.3269506	64	-1.6782609224319458
1599537855.4473114	65	-1.3645833730697632
1599538718.4801676	66	-4.564000129699707
1599539591.1168706	67	0.5347825884819031
1599540449.518573	68	-3.6416666507720947
1599541295.7873845	69	-1.1974358558654785
1599542151.5675712	70	-1.9145833253860474
1599543004.8859832	71	-2.644897937774658
1599543858.5609434	72	-5.427451133728027
1599544715.2963176	73	-3.115000009536743
1599545560.9068089	74	-4.813043594360352
1599546419.1558912	75	-2.970370292663574
1599547289.8544712	76	-3.1229166984558105
1599548143.3388608	77	-0.18378378450870514
1599548998.8496912	78	-1.0333333015441895
1599549852.9652195	79	-2.5205881595611572
1599550716.5902138	80	-1.9444444179534912
1599551572.020701	81	-2.9717390537261963
1599552417.6858375	82	-4.235714435577393
1599553268.0706334	83	-2.0428571701049805
1599554100.7791085	84	-1.1916667222976685
1599554935.457394	85	-1.5759999752044678
1599555762.247454	86	-0.3499999940395355
1599556603.435878	87	-1.108888864517212
1599557457.7700357	88	-4.129787445068359
1599558316.2531426	89	-1.2194443941116333
1599559173.1326284	90	-1.9189189672470093
1599560022.4830477	91	-3.0466666221618652
1599560881.5437326	92	-3.125
1599561728.5788088	93	-0.21250000596046448
1599562576.9776359	94	-2.361363649368286
1599563263.5193884	95	1.2285714149475098
1599563937.788539	96	-3.2961537837982178
1599564583.8853345	97	-4.721621513366699
1599565245.729702	98	-3.5045454502105713
1599565911.662882	99	-4.134883880615234
1599566547.2218878	100	-3.51111102104187
