# Supplementary material
Source: ML conference proceedings conference paper supplement (https://proceedings.mlr.press/v139/rahman21a.html)
Supplement: Supplementary file 3 [file rahman21a-supp.zip › ICMLSupportingDoc 2/Visualization/OpenFortAttackRes/TRAIN/LSTM-RFM/run-rxgenpnipo-tag-Rewards_train_set.csv]

Wall time	Step	Value
1599479035.8956594	0	-6.7727274894714355
1599479962.6110418	1	-8.555882453918457
1599480888.175833	2	-8.52750015258789
1599481820.988659	3	-6.50600004196167
1599482749.2970653	4	-6.2568182945251465
1599483684.1384022	5	-7.122727394104004
1599484612.9410846	6	-4.494736671447754
1599485548.013181	7	-7.449999809265137
1599486482.7453592	8	-6.386363506317139
1599487415.9757106	9	-4.323684215545654
1599488341.8551662	10	-4.03636360168457
1599489262.4421866	11	-1.865625023841858
1599490190.5551295	12	-6.127272605895996
1599491123.7200572	13	-5.144444465637207
1599492065.2717798	14	-4.406818389892578
1599492993.4568698	15	-5.52571439743042
1599493918.452288	16	-6.084210395812988
1599494842.2697132	17	-3.9738094806671143
1599495778.1711514	18	-3.151428461074829
1599496708.884326	19	-5.333333492279053
1599497640.8774955	20	-3.930952310562134
1599498573.2636476	21	-3.25
1599499504.8488395	22	-4.196666717529297
1599500430.234755	23	-3.240476131439209
1599501351.3224354	24	-4.529268264770508
1599502270.6543937	25	-2.4935483932495117
1599503189.0466056	26	-5.45945930480957
1599504100.0341332	27	-3.696969747543335
1599504990.7066598	28	-2.277777671813965
1599505886.2804894	29	-3.8717949390411377
1599506773.5752802	30	-5.052174091339111
1599507661.461121	31	-4.812195301055908
1599508541.1049001	32	-2.471428632736206
1599509399.6063223	33	-3.9911763668060303
1599510269.4612875	34	-3.278125047683716
1599511146.4082148	35	-3.765714168548584
1599512023.7239254	36	-3.936363697052002
1599512899.6437218	37	-3.865957498550415
1599513772.9872391	38	-2.695918321609497
1599514654.3604257	39	-5.067567348480225
1599515521.3739736	40	-3.424999952316284
1599516395.9765568	41	-1.5266666412353516
1599517264.7713578	42	-0.8641025424003601
1599518139.8272784	43	-1.2774193286895752
1599519037.0253673	44	-2.9236841201782227
1599519948.648773	45	-2.874000072479248
1599520848.1328092	46	-2.5333333015441895
1599521726.2480986	47	-0.37599998712539673
1599522620.2385726	48	-3.971052646636963
1599523500.113834	49	-3.980487823486328
1599524373.373571	50	-3.1822221279144287
1599525248.0320394	51	-3.0729730129241943
1599526124.4916403	52	-2.7696969509124756
1599526997.934915	53	-2.4177777767181396
1599527873.285362	54	-2.7179486751556396
1599528760.7499864	55	-4.012195110321045
1599529646.3099988	56	-2.438235282897949
1599530531.4290676	57	-2.961538553237915
1599531408.1175137	58	-4.490476131439209
1599532285.0559006	59	-3.426086902618408
1599533151.0832474	60	-2.968292713165283
1599534017.198421	61	0.9454545378684998
1599534878.0833423	62	-0.5510638356208801
1599535736.8993514	63	-1.408571481704712
1599536601.5784478	64	-2.2372093200683594
1599537453.6114073	65	-1.899999976158142
1599538300.976033	66	-0.5115384459495544
1599539162.6894395	67	-3.557692289352417
1599540044.1036618	68	-2.074509859085083
1599540916.7973623	69	-4.338235378265381
1599541786.1466527	70	-2.6875
1599542663.14731	71	-5.25600004196167
1599543538.2881365	72	-5.077142715454102
1599544408.3044958	73	-2.9484848976135254
1599545276.935692	74	-2.542424201965332
1599546137.8960583	75	-2.680392265319824
1599547012.0496917	76	-1.7134615182876587
1599547861.1636004	77	-2.1019608974456787
1599548707.745756	78	-1.7509434223175049
1599549558.6878855	79	-5.154054164886475
1599550421.160735	80	-2.08695650100708
1599551280.2304506	81	-2.825925827026367
1599552148.3737504	82	-2.1314284801483154
1599553013.7293875	83	-2.3388888835906982
1599553876.7035422	84	-4.360975742340088
1599554750.6134112	85	-2.3019607067108154
1599555622.5476286	86	-0.5629629492759705
1599556497.6626952	87	-2.918181896209717
1599557368.2934237	88	-1.3272727727890015
1599558243.6887393	89	-1.5867924690246582
1599559114.5229144	90	-0.04374999925494194
1599559987.4731228	91	-2.813793182373047
1599560845.9202003	92	-4.411764621734619
1599561704.6513631	93	-5.6875
1599562570.513568	94	0.21666666865348816
1599563361.9941247	95	-1.6714285612106323
1599564111.7052302	96	-3.51111102104187
1599564830.6823199	97	-2.7695651054382324
1599565552.7389877	98	-4.668421268463135
1599566266.9358041	99	-2.0088889598846436
1599566840.5302894	100	-2.387179374694824
