# Supplementary material
Source: ML conference proceedings conference paper supplement (https://proceedings.mlr.press/v139/rahman21a.html)
Supplement: Supplementary file 3 [file rahman21a-supp.zip › ICMLSupportingDoc 2/Visualization/OpenFortAttackRes/TRAIN/LSTM-RFM/run-sbbrltrgix-tag-Rewards_train_set.csv]

Wall time	Step	Value
1599479044.7191355	0	-6.942500114440918
1599479978.8186445	1	-6.680952548980713
1599480913.9715421	2	-7.46999979019165
1599481844.85697	3	-6.970731735229492
1599482771.9860928	4	-6.02571439743042
1599483703.9380548	5	-6.748936176300049
1599484629.1396298	6	-4.902777671813965
1599485566.5400271	7	-5.613953590393066
1599486515.8443124	8	-5.324999809265137
1599487450.71167	9	-4.360714435577393
1599488384.9661372	10	-4.54878044128418
1599489312.9248514	11	-2.7090909481048584
1599490245.4903932	12	-6.179411888122559
1599491179.3413548	13	-4.914285659790039
1599492120.5255067	14	-3.2638888359069824
1599493057.10514	15	-4.297674655914307
1599493980.1347153	16	-4.857142925262451
1599494903.559415	17	-3.861764669418335
1599495844.1335711	18	-3.6789474487304688
1599496774.4543982	19	-4.051723957061768
1599497699.9303596	20	-3.7219512462615967
1599498627.2431011	21	-2.124390125274658
1599499556.7810614	22	-0.5759999752044678
1599500478.442373	23	-4.503571510314941
1599501396.0895727	24	-3.774074077606201
1599502321.3495526	25	-1.1466666460037231
1599503227.4012191	26	-1.9696969985961914
1599504113.1558132	27	-4.190476417541504
1599504969.4760685	28	-4.342105388641357
1599505840.553596	29	-1.3483871221542358
1599506708.7342699	30	-3.063999891281128
1599507588.067039	31	-2.6472222805023193
1599508455.9663236	32	-1.9020832777023315
1599509316.7731776	33	-2.129629611968994
1599510191.9559343	34	-3.1205883026123047
1599511065.450543	35	-2.7382352352142334
1599511944.862064	36	-4.251020431518555
1599512813.47881	37	-2.5924999713897705
1599513686.1266232	38	-2.960606098175049
1599514545.973001	39	-5.144999980926514
1599515398.0637627	40	-2.939215660095215
1599516243.0174644	41	-6.431579113006592
1599517085.7648213	42	-3.607142925262451
1599517917.8179715	43	-3.1461539268493652
1599518745.166168	44	-3.565624952316284
1599519553.211743	45	-3.8499999046325684
1599520353.169292	46	-8.107142448425293
1599521187.286733	47	-2.391111135482788
1599522040.6248937	48	-2.758490562438965
1599522880.9381468	49	-1.741025686264038
1599523739.2698905	50	-4.335714340209961
1599524596.6246152	51	-4.602631568908691
1599525450.8637967	52	-1.690000057220459
1599526307.8102484	53	-2.816666603088379
1599527158.7116408	54	-4.508333206176758
1599528023.6147556	55	-2.618518590927124
1599528886.095034	56	-2.4678571224212646
1599529747.6673656	57	-2.7285714149475098
1599530602.4809768	58	-4.593616962432861
1599531463.756974	59	-2.9279069900512695
1599532309.6568432	60	-3.651111125946045
1599533165.1107514	61	-3.200000047683716
1599534017.9285767	62	-4.764285564422607
1599534887.0275662	63	-3.33695650100708
1599535748.425768	64	-2.4864864349365234
1599536613.67044	65	-3.844897985458374
1599537465.526699	66	-2.6414635181427
1599538324.3037004	67	-0.6354838609695435
1599539204.3112807	68	-3.19024395942688
1599540073.5688019	69	-2.8942856788635254
1599540944.869104	70	-1.255555510520935
1599541826.5520017	71	-0.6000000238418579
1599542702.996233	72	-1.5736842155456543
1599543569.4326918	73	-4.953488349914551
1599544442.2810016	74	-1.8333333730697632
1599545297.346751	75	-3.7294118404388428
1599546164.384106	76	-3.0999999046325684
1599547035.533261	77	-2.4344828128814697
1599547903.9196053	78	-2.0128204822540283
1599548772.7313626	79	-3.7365384101867676
1599549644.3805676	80	-2.281081199645996
1599550514.5591996	81	-2.9625000953674316
1599551393.2921927	82	-3.6466667652130127
1599552265.1774535	83	-2.660975694656372
1599553125.697411	84	-2.739473581314087
1599553999.8891792	85	-1.9222222566604614
1599554868.2261708	86	-0.5767441987991333
1599555757.2760031	87	-1.2050000429153442
1599556643.2937713	88	-3.8173913955688477
1599557511.2497816	89	-1.3419355154037476
1599558388.352042	90	-4.154716968536377
1599559255.042576	91	-3.164705991744995
1599560132.0168364	92	-3.0244898796081543
1599560980.134212	93	0.6826087236404419
1599561853.1353004	94	-3.240816354751587
1599562695.4818883	95	-3.0205881595611572
1599563481.5387857	96	-1.3214285373687744
1599564223.202215	97	-3.823255777359009
1599564943.595473	98	-1.3916666507720947
1599565668.3080292	99	-1.4810811281204224
1599566400.8776221	100	-3.2928571701049805
