# Supplementary material
Source: ML conference proceedings conference paper supplement (https://proceedings.mlr.press/v139/rahman21a.html)
Supplement: Supplementary file 3 [file rahman21a-supp.zip › ICMLSupportingDoc 2/Visualization/OpenFortAttackRes/TRAIN/LSTM-RFM_test/run-dhzkirtcio-tag-Rewards_eval.csv]

Wall time	Step	Value
1599479040.9554882	0	-5.060606002807617
1599479872.0078697	1	-4.946808338165283
1599480702.5790026	2	-7.153191566467285
1599481519.5618196	3	-4.72777795791626
1599482327.0753653	4	-6.721739292144775
1599483141.5034075	5	-7.866666793823242
1599483967.3235688	6	-5.2682929039001465
1599484785.450765	7	-7.2727274894714355
1599485603.303424	8	-3.909090995788574
1599486408.9461384	9	-3.4800000190734863
1599487218.7182412	10	-6.360000133514404
1599488033.524478	11	-3.5
1599488850.461376	12	-3.0399999618530273
1599489677.0748057	13	-4.111428737640381
1599490496.3216608	14	-2.8954546451568604
1599491306.8694606	15	-1.4177777767181396
1599492104.2492151	16	-6.956521511077881
1599492909.1195514	17	-6.46842098236084
1599493718.9251344	18	-3.1244444847106934
1599494528.7442842	19	-4.650000095367432
1599495337.3770936	20	-4.306521892547607
1599496142.4936197	21	-5.245098114013672
1599496938.7815578	22	-7.123809337615967
1599497747.8110595	23	-5.285366058349609
1599498546.8327718	24	-4.664583206176758
1599499343.3807695	25	-3.0999999046325684
1599500146.9827797	26	-4.134615421295166
1599500964.4701016	27	-3.3415093421936035
1599501780.0475585	28	-5.132432460784912
1599502583.8645635	29	-2.842424154281616
1599503398.169289	30	-2.367391347885132
1599504254.196749	31	-3.17380952835083
1599505117.2556674	32	-4.617021083831787
1599505957.125188	33	-3.3333332538604736
1599506823.1484258	34	-5.507843017578125
1599507697.1896567	35	-2.532352924346924
1599508569.3787332	36	-6.485714435577393
1599509453.1236582	37	-4.226415157318115
1599510328.5293653	38	-4.794117450714111
1599511194.7220433	39	-3.132608652114868
1599512057.9024673	40	-6.203225612640381
1599512931.3153563	41	-2.808823585510254
1599513814.220651	42	-5.813889026641846
1599514692.6204748	43	-2.932499885559082
1599515588.229819	44	-6.0068182945251465
1599516480.5901783	45	-4.305769443511963
1599517376.877603	46	-3.907017469406128
1599518271.7310534	47	-7.092857360839844
1599519177.500802	48	-5.563889026641846
1599520099.1342893	49	-4.5625
1599520998.4319606	50	-4.848936080932617
1599521888.40058	51	-4.095454692840576
1599522761.4382205	52	-4.384615421295166
1599523633.5782416	53	-4.1229166984558105
1599524513.200331	54	-3.8470587730407715
1599525398.768468	55	-4.586666584014893
1599526261.5492418	56	-4.400000095367432
1599527127.4886036	57	-5.253333568572998
1599527984.7590673	58	-3.325000047683716
1599528830.6332917	59	-4.488571643829346
1599529677.2421305	60	-3.652083396911621
1599530535.6536703	61	-2.520512819290161
1599531393.7757494	62	-4.497142791748047
1599532268.7787888	63	-2.746000051498413
1599533140.3437123	64	-3.9314286708831787
1599533996.47211	65	-4.476470470428467
1599534849.6141553	66	-3.183783769607544
1599535717.3508158	67	-2.911320686340332
1599536576.1197047	68	-4.27400016784668
1599537429.8777022	69	-2.5325582027435303
1599538299.0674	70	-2.6564102172851562
1599539157.8758187	71	-3.983673572540283
1599540009.1829998	72	-5.258823394775391
1599540858.4995813	73	-3.6092593669891357
1599541701.8795075	74	-3.7750000953674316
1599542551.637006	75	-2.894230842590332
1599543396.7916582	76	-4.346153736114502
1599544253.4056036	77	-1.5404762029647827
1599545115.3099964	78	-3.3359999656677246
1599545975.1311054	79	-4.5756096839904785
1599546856.7048392	80	-2.948979616165161
1599547728.4545274	81	-2.7821428775787354
1599548607.965327	82	-3.0756096839904785
1599549479.7212737	83	0.06279069930315018
1599550343.6426528	84	-1.2894736528396606
1599551214.8198695	85	-2.5416667461395264
1599552077.0251026	86	-4.965116500854492
1599552944.767577	87	-3.1914286613464355
1599553816.317023	88	-5.075555324554443
1599554683.6344879	89	-1.1883721351623535
1599555527.451311	90	-3.536170244216919
1599556363.394676	91	-4.675609588623047
1599557208.2854245	92	-1.7411764860153198
1599558061.9394245	93	-4.024242401123047
1599558920.5688202	94	-4.204347610473633
1599559758.0977645	95	-4.594594478607178
1599560617.768144	96	-4.268750190734863
1599561470.4894226	97	-2.240000009536743
1599562322.2671938	98	-2.6500000953674316
1599563071.4151802	99	-1.4365853071212769
1599563763.5509784	100	-5.23421049118042
