# Supplementary material
Source: ML conference proceedings conference paper supplement (https://proceedings.mlr.press/v139/rahman21a.html)
Supplement: Supplementary file 3 [file rahman21a-supp.zip › ICMLSupportingDoc 2/Visualization/OpenFortAttackRes/TRAIN/LSTM-RFM_test/run-edaknggtca-tag-Rewards_eval.csv]

Wall time	Step	Value
1599479046.2290869	0	-7.093023300170898
1599479858.5811675	1	-5.5511627197265625
1599480677.1399515	2	-5.573809623718262
1599481493.7812119	3	-4.574999809265137
1599482295.599012	4	-5.937837600708008
1599483102.4599152	5	-4.334042549133301
1599483907.1304464	6	-4.108333110809326
1599484724.4616747	7	-5.482500076293945
1599485532.5682	8	-3.654545545578003
1599486333.8418982	9	-4.57692289352417
1599487132.7131019	10	-4.897297382354736
1599487936.73997	11	-4.747499942779541
1599488739.4098737	12	-5.54054069519043
1599489557.3806086	13	-4.475675582885742
1599490374.1102471	14	-5.827026844024658
1599491175.608573	15	-3.700000047683716
1599491970.0921938	16	-3.9558823108673096
1599492771.572956	17	-5.992499828338623
1599493578.627345	18	-3.7472221851348877
1599494388.648246	19	-3.402222156524658
1599495186.6911492	20	-5.449999809265137
1599495984.402382	21	-6.751020431518555
1599496783.1084633	22	-4.625999927520752
1599497582.758358	23	-4.1875
1599498373.3824496	24	-1.4533333778381348
1599499161.8766284	25	-3.2471697330474854
1599499959.8109248	26	-3.376190423965454
1599500756.9911158	27	-4.673170566558838
1599501554.6944368	28	-3.0619046688079834
1599502343.467396	29	-1.360714316368103
1599503143.453048	30	-2.5361111164093018
1599503974.5531416	31	-3.607407331466675
1599504823.518462	32	-3.9288887977600098
1599505653.2865956	33	-2.3147058486938477
1599506485.594403	34	-2.5487804412841797
1599507341.4075675	35	-1.5891891717910767
1599508190.8716822	36	-5.426086902618408
1599509056.390279	37	-3.6454546451568604
1599509912.8362222	38	-1.008888840675354
1599510765.5958343	39	-3.9642856121063232
1599511607.732936	40	-2.456249952316284
1599512459.8464875	41	-5.419444561004639
1599513315.9074483	42	-2.98421049118042
1599514166.7472165	43	-3.168750047683716
1599515018.0784364	44	-2.8678572177886963
1599515887.617937	45	-6.866666793823242
1599516758.8238888	46	-2.83695650100708
1599517633.2065408	47	-2.327777862548828
1599518516.8092022	48	-2.4355554580688477
1599519397.242391	49	-4.429032325744629
1599520291.1151912	50	-4.1854166984558105
1599521167.0154297	51	-2.7853658199310303
1599522032.220572	52	-3.6857142448425293
1599522882.1847477	53	-6.833333492279053
1599523726.675417	54	-1.845945954322815
1599524582.213098	55	-2.2437500953674316
1599525435.7303288	56	-2.8212766647338867
1599526289.2381148	57	-3.7673468589782715
1599527156.3955138	58	-3.978048801422119
1599528008.7814646	59	-4.953845977783203
1599528854.456463	60	-3.805263042449951
1599529695.8380156	61	-1.9538460969924927
1599530553.6508684	62	-3.0085713863372803
1599531410.3575654	63	-5.023809432983398
1599532268.2474787	64	-5.136170387268066
1599533130.2581685	65	-2.3978724479675293
1599533981.8359132	66	-3.7612903118133545
1599534839.4011817	67	-4.996428489685059
1599535696.639691	68	-2.5543477535247803
1599536540.0255497	69	-4.2756757736206055
1599537402.1009562	70	-4.907894611358643
1599538273.276258	71	-6.134090900421143
1599539127.055529	72	0.2979166805744171
1599539960.9758592	73	-4.800000190734863
1599540799.6722982	74	-7.035294055938721
1599541634.0051527	75	-2.7925000190734863
1599542490.552212	76	-3.2567567825317383
1599543335.5803123	77	-4.262499809265137
1599544177.2011096	78	-2.1038460731506348
1599545025.2521608	79	-4.0354838371276855
1599545874.5803556	80	-4.0714287757873535
1599546722.3363435	81	-4.872499942779541
1599547589.6692579	82	-4.534693717956543
1599548435.096269	83	-4.434091091156006
1599549275.0849137	84	-2.1607143878936768
1599550114.2353806	85	-1.0777777433395386
1599550951.6791947	86	-3.5625
1599551799.1059337	87	-4.699999809265137
1599552639.1575098	88	-4.634146213531494
1599553479.0126147	89	-1.4404761791229248
1599554311.5545547	90	-0.930232584476471
1599555141.246867	91	-2.8309524059295654
1599555967.3872702	92	-4.132608890533447
1599556802.4010642	93	-3.8499999046325684
1599557645.2233124	94	-2.480769157409668
1599558464.914518	95	-3.373333215713501
1599559308.2957141	96	-4.431250095367432
1599560148.4209337	97	-3.8975000381469727
1599560994.707084	98	-0.5789473652839661
1599561831.856925	99	-1.265625
1599562656.0607405	100	-3.529545545578003
