# Supplementary material
Source: ML conference proceedings conference paper supplement (https://proceedings.mlr.press/v139/rahman21a.html)
Supplement: Supplementary file 3 [file rahman21a-supp.zip › ICMLSupportingDoc 2/Visualization/OpenFortAttackRes/TRAIN/LSTM-RFM_test/run-grvsjnkfrt-tag-Rewards_eval.csv]

Wall time	Step	Value
1599479042.5597734	0	-7.8125
1599479973.3295312	1	-3.7903225421905518
1599480903.2081602	2	-4.566666603088379
1599481833.584742	3	-5.704545497894287
1599482763.914815	4	-5.137209415435791
1599483705.74884	5	-3.563157796859741
1599484643.347588	6	-4.355319023132324
1599485576.593917	7	-2.7806451320648193
1599486527.9971542	8	-5.107500076293945
1599487467.979616	9	-5.3447370529174805
1599488403.9858487	10	-4.831250190734863
1599489341.4441855	11	-6.3023810386657715
1599490276.8465118	12	-5.696296215057373
1599491226.0402536	13	-6.116666793823242
1599492167.970633	14	-3.0514285564422607
1599493102.7203534	15	-5.206382751464844
1599494040.4813724	16	-5.193478107452393
1599494970.0731986	17	-4.757143020629883
1599495904.607262	18	-7.37333345413208
1599496842.9295409	19	-4.931818008422852
1599497774.772472	20	-5.557499885559082
1599498712.0908148	21	-3.1980769634246826
1599499640.506909	22	-6.323684215545654
1599500566.1702309	23	-3.4976744651794434
1599501488.9702811	24	-3.65238094329834
1599502411.3368576	25	-3.007499933242798
1599503330.7797196	26	-5.162222385406494
1599504224.2560174	27	-3.0290322303771973
1599505097.8919468	28	-4.907407283782959
1599505980.0963862	29	-4.290625095367432
1599506856.9156826	30	-2.963829755783081
1599507737.3952038	31	-3.572499990463257
1599508599.1851535	32	-4.9758620262146
1599509465.2079313	33	-4.356249809265137
1599510343.0945017	34	-2.7717947959899902
1599511228.2215085	35	-4.454999923706055
1599512105.7944288	36	-3.9100000858306885
1599512973.0397844	37	-3.795121908187866
1599513839.065127	38	-5.334883689880371
1599514694.8848631	39	-5.902222156524658
1599515544.800364	40	-5.3023810386657715
1599516389.4318485	41	-1.412195086479187
1599517224.1825616	42	-4.828571319580078
1599518059.4363894	43	-4.9282050132751465
1599518889.5793662	44	-4.436110973358154
1599519700.5926173	45	-4.900000095367432
1599520520.0541081	46	-4.144117832183838
1599521363.5914607	47	-2.781818151473999
1599522208.9221432	48	-4.032608509063721
1599523066.5082405	49	-3.3499999046325684
1599523938.5530326	50	-2.168888807296753
1599524783.9504642	51	-3.1235294342041016
1599525639.6269794	52	-3.002631664276123
1599526497.8951983	53	-3.3919999599456787
1599527355.2462795	54	-5.0411763191223145
1599528224.3480067	55	-4.1344828605651855
1599529094.908163	56	-4.408108234405518
1599529965.4502177	57	-4.868000030517578
1599530820.9602737	58	-4.166666507720947
1599531691.9475226	59	-5.678048610687256
1599532561.899016	60	-2.5
1599533438.1745236	61	-3.5560975074768066
1599534302.3413901	62	-3.9361112117767334
1599535163.500402	63	-3.7707316875457764
1599536030.988327	64	-3.2771427631378174
1599536883.7821198	65	-1.6058824062347412
1599537732.2761946	66	-3.921428680419922
1599538597.520035	67	-6.337037086486816
1599539473.550072	68	-2.4166667461395264
1599540350.4712334	69	-4.221568584442139
1599541229.0622368	70	-2.4166667461395264
1599542103.7464943	71	-2.308333396911621
1599542974.5616362	72	-4.9697675704956055
1599543844.0066376	73	-2.1027777194976807
1599544701.0545225	74	-3.2517242431640625
1599545551.7329676	75	-6.352380752563477
1599546411.4521499	76	-4.067500114440918
1599547277.2779284	77	-3.279411792755127
1599548146.1346934	78	-6.785294055938721
1599549006.1974628	79	-4.75
1599549884.4195867	80	-4.179999828338623
1599550761.264142	81	-3.028205156326294
1599551632.0134895	82	-7.566666603088379
1599552508.6861074	83	-4.900000095367432
1599553374.7449834	84	-1.2057143449783325
1599554255.1979678	85	-5.45405387878418
1599555128.0167499	86	-5.746341228485107
1599556012.6517916	87	-2.2208333015441895
1599556889.7755315	88	-5.6875
1599557756.8154335	89	-2.923076868057251
1599558627.418467	90	-3.9891891479492188
1599559494.6043513	91	-4.347916603088379
1599560372.11152	92	-1.0525000095367432
1599561238.7807496	93	-3.2074999809265137
1599562123.765595	94	-5.354053974151611
1599562968.1178942	95	-6.2076921463012695
1599563762.5840125	96	-4.188636302947998
1599564457.1276374	97	-3.1480770111083984
1599565117.2849936	98	-2.385714292526245
1599565774.8390055	99	-3.1421053409576416
1599566436.56056	100	-4.019999980926514
