# Supplementary material
Source: ML conference proceedings conference paper supplement (https://proceedings.mlr.press/v139/rahman21a.html)
Supplement: Supplementary file 3 [file rahman21a-supp.zip › ICMLSupportingDoc 2/Visualization/OpenFortAttackRes/TRAIN/LSTM-RFM_test/run-iodbrjkxfn-tag-Rewards_eval.csv]

Wall time	Step	Value
1599479046.7771707	0	-9.481481552124023
1599479860.4995546	1	-6.189795970916748
1599480683.5644197	2	-5.099999904632568
1599481501.050897	3	-8.491999626159668
1599482298.2943034	4	-4.044827461242676
1599483112.4443724	5	-4.713725566864014
1599483921.6772952	6	-5.019354820251465
1599484739.3090935	7	-3.319512128829956
1599485550.022667	8	-6.115555763244629
1599486349.162066	9	-6.563414573669434
1599487148.7896879	10	-6.065000057220459
1599487950.0494306	11	-4.847727298736572
1599488753.824095	12	-6.224999904632568
1599489558.9352934	13	-7.788235187530518
1599490362.6483724	14	-5.667567729949951
1599491169.682333	15	-3.7411763668060303
1599491974.993225	16	-4.830303192138672
1599492778.130918	17	-4.346153736114502
1599493583.2791042	18	-5.041666507720947
1599494382.5411935	19	-3.1064515113830566
1599495182.1252103	20	-6.378125190734863
1599495972.6924708	21	-3.2405405044555664
1599496762.5171769	22	-3.5225000381469727
1599497572.1157296	23	-2.440000057220459
1599498374.7777324	24	-4.482926845550537
1599499177.4719472	25	-2.8314285278320312
1599499986.7112706	26	-4.7731709480285645
1599500787.9611917	27	-3.6477272510528564
1599501587.426502	28	-8.033333778381348
1599502380.5114992	29	-2.5042552947998047
1599503182.613801	30	-2.3320000171661377
1599504009.972327	31	-2.196666717529297
1599504859.9868572	32	-2.3021275997161865
1599505692.6542246	33	-4.196875095367432
1599506523.4164915	34	-4.188889026641846
1599507382.1191394	35	-3.23714280128479
1599508230.5183208	36	-3.9638888835906982
1599509086.2542567	37	-2.329411745071411
1599509945.8930712	38	-4.832353115081787
1599510797.1850774	39	-3.8044445514678955
1599511638.6771543	40	-0.39714285731315613
1599512487.0927813	41	-3.507692337036133
1599513347.9217484	42	-4.044444561004639
1599514198.930387	43	-7.079166889190674
1599515052.863472	44	-6.699999809265137
1599515913.6067653	45	-1.5499999523162842
1599516777.5105093	46	-4.863888740539551
1599517650.5594578	47	-3.978048801422119
1599518532.1267889	48	-1.7200000286102295
1599519406.26845	49	-2.5172414779663086
1599520298.4460912	50	-4.853125095367432
1599521164.335504	51	-1.9227272272109985
1599522014.61664	52	-5.809677600860596
1599522866.0338316	53	-5.351515293121338
1599523710.594732	54	-2.912903308868408
1599524567.9269333	55	-4.440384387969971
1599525411.605285	56	-1.9459999799728394
1599526249.4254718	57	-8.171428680419922
1599527096.0610464	58	-6.223076820373535
1599527937.9889321	59	-3.566666603088379
1599528763.8571525	60	-1.9517241716384888
1599529588.226434	61	-1.6541666984558105
1599530431.2469547	62	-4.2580647468566895
1599531271.6422167	63	-3.2743589878082275
1599532113.5901592	64	-2.7227272987365723
1599532955.2501774	65	-3.04489803314209
1599533802.1625187	66	-2.864285707473755
1599534640.0992494	67	-3.8241379261016846
1599535492.956904	68	-2.3111112117767334
1599536331.0775373	69	-5.582857131958008
1599537180.5861652	70	-5.482051372528076
1599538044.8969293	71	-6.183333396911621
1599538881.7691798	72	-2.8490195274353027
1599539710.0466661	73	-0.31142857670783997
1599540532.7118664	74	-2.362790584564209
1599541361.953425	75	-5.97777795791626
1599542211.7195518	76	-4.643750190734863
1599543057.0163643	77	-2.859999895095825
1599543911.5711617	78	-3.0085105895996094
1599544760.1830645	79	-3.4724137783050537
1599545614.799292	80	-6.038235187530518
1599546471.1908998	81	-2.3755555152893066
1599547343.1058753	82	-2.5428571701049805
1599548195.5074651	83	-3.1483871936798096
1599549050.0364728	84	-3.1500000953674316
1599549897.2837756	85	-2.547499895095825
1599550739.56556	86	-2.276923179626465
1599551588.8584912	87	-1.3068181276321411
1599552438.505358	88	-4.673684120178223
1599553283.0278032	89	-4.607142925262451
1599554126.7839963	90	-3.7324323654174805
1599554960.8493385	91	-4.811363697052002
1599555791.6704597	92	-0.5233333110809326
1599556631.7094526	93	-2.814814805984497
1599557470.9542685	94	-6.565384387969971
1599558310.1990058	95	-0.8864864706993103
1599559146.9215229	96	-3.640000104904175
1599559966.9329157	97	-6.417646884918213
1599560812.717619	98	-4.231578826904297
1599561668.9665132	99	-4.2390241622924805
1599562520.0596483	100	-3.7853658199310303
