# Supplementary material
Source: ML conference proceedings conference paper supplement (https://proceedings.mlr.press/v139/rahman21a.html)
Supplement: Supplementary file 3 [file rahman21a-supp.zip › ICMLSupportingDoc 2/Visualization/OpenFortAttackRes/TRAIN/LSTM-RFM_test/run-ofhfdedubf-tag-Rewards_eval.csv]

Wall time	Step	Value
1599479054.061789	0	-4.0
1599479987.7769942	1	-5.555172443389893
1599480916.026797	2	-6.221875190734863
1599481846.322779	3	-6.243589878082275
1599482783.4742174	4	-5.643589973449707
1599483726.0864444	5	-6.446808338165283
1599484664.2160141	6	-6.527585983276367
1599485606.5941768	7	-4.743589878082275
1599486552.6820772	8	-7.936363697052002
1599487496.555149	9	-5.612765789031982
1599488431.2093165	10	-6.144444465637207
1599489361.6750839	11	-4.993750095367432
1599490298.558774	12	-3.066666603088379
1599491234.017851	13	-4.780555725097656
1599492178.66856	14	-5.172727108001709
1599493119.6811821	15	-3.4480769634246826
1599494053.1535544	16	-3.8021275997161865
1599494986.3032327	17	-3.0195651054382324
1599495932.4024537	18	-5.745238304138184
1599496872.8827536	19	-4.202272891998291
1599497805.01316	20	-3.548837184906006
1599498741.889937	21	-2.317500114440918
1599499669.9531605	22	-3.1657893657684326
1599500600.476753	23	-4.760606288909912
1599501517.7922933	24	-3.7174999713897705
1599502442.118635	25	-4.177358627319336
1599503358.906607	26	-3.675675630569458
1599504247.4992404	27	-2.9388887882232666
1599505124.9778266	28	-1.4585366249084473
1599506014.737846	29	-2.404444456100464
1599506889.5914917	30	-3.612903118133545
1599507775.8497431	31	-3.5457143783569336
1599508654.342544	32	-3.6934783458709717
1599509519.256754	33	-2.4777777194976807
1599510388.4751325	34	-4.955555438995361
1599511261.9637249	35	-8.631817817687988
1599512138.102503	36	-3.4200000762939453
1599513003.4874475	37	-4.275555610656738
1599513863.9063542	38	-4.495555400848389
1599514724.1244328	39	-5.208107948303223
1599515566.1227715	40	-4.30232572555542
1599516408.258095	41	-4.818749904632568
1599517243.6326246	42	-4.397777557373047
1599518071.7821233	43	0.8136363625526428
1599518899.6496377	44	-4.5
1599519706.739117	45	-2.875
1599520522.9969852	46	-3.4612245559692383
1599521362.2932365	47	-6.271052837371826
1599522205.4187608	48	-1.5366666316986084
1599523054.6027973	49	-3.2717392444610596
1599523919.0811539	50	-5.522857189178467
1599524773.5258732	51	-2.3904762268066406
1599525635.5152907	52	-3.997560977935791
1599526485.2964451	53	-4.699999809265137
1599527339.311187	54	-4.599999904632568
1599528210.7847216	55	-5.997436046600342
1599529090.6502278	56	-2.6408162117004395
1599529953.4361427	57	-3.558974266052246
1599530805.5226436	58	-6.199999809265137
1599531681.428579	59	-3.4693877696990967
1599532535.962859	60	-5.878048896789551
1599533393.676594	61	-2.0850000381469727
1599534249.4725745	62	-4.291836738586426
1599535107.72768	63	-3.671428680419922
1599535972.0458734	64	-3.5232558250427246
1599536829.112294	65	-3.5999999046325684
1599537676.9281542	66	-4.1086955070495605
1599538540.4622917	67	-6.263888835906982
1599539409.4510431	68	-4.354545593261719
1599540280.6270013	69	-5.502222061157227
1599541157.7710712	70	-3.6416666507720947
1599542038.269769	71	-2.5117647647857666
1599542905.0968182	72	-5.386842250823975
1599543774.6884081	73	-4.828571319580078
1599544628.3283696	74	-4.913793087005615
1599545489.866312	75	-2.8729166984558105
1599546350.552181	76	-2.4103448390960693
1599547206.0827832	77	-4.134375095367432
1599548062.2994483	78	-5.086206912994385
1599548919.0433195	79	-2.5714285373687744
1599549779.8079967	80	-4.675000190734863
1599550637.6007555	81	-4.481081008911133
1599551506.7315857	82	-3.6795454025268555
1599552373.3742008	83	-3.9228570461273193
1599553233.1825213	84	-2.981818199157715
1599554106.7380843	85	-3.927500009536743
1599554974.0387974	86	-1.7783783674240112
1599555861.5662887	87	-3.351428508758545
1599556739.9878047	88	-1.439130425453186
1599557607.2944448	89	-7.150000095367432
1599558480.3294566	90	-3.232558250427246
1599559341.3112743	91	-4.800000190734863
1599560210.5653079	92	-2.547619104385376
1599561062.7754169	93	-6.889473915100098
1599561945.046792	94	-1.8636363744735718
1599562793.4600258	95	-3.5487804412841797
1599563571.775215	96	-2.980769157409668
1599564311.3957498	97	-4.212903022766113
1599565028.988728	98	-3.4358973503112793
1599565743.0956001	99	-2.633333444595337
1599566452.5420833	100	-4.050000190734863
