# Supplementary material
Source: ML conference proceedings conference paper supplement (https://proceedings.mlr.press/v139/rahman21a.html)
Supplement: Supplementary file 3 [file rahman21a-supp.zip › ICMLSupportingDoc 2/Visualization/OpenFortAttackRes/TRAIN/LSTM-RFM_test/run-qtldaqxlkc-tag-Rewards_eval.csv]

Wall time	Step	Value
1599479042.1721766	0	-6.286110877990723
1599479975.7136793	1	-4.083333492279053
1599480909.9927394	2	-6.517857074737549
1599481843.8807597	3	-5.371428489685059
1599482776.3129385	4	-4.330555438995361
1599483721.4523108	5	-3.6288888454437256
1599484654.9360323	6	-6.8913044929504395
1599485588.3248076	7	-2.6413042545318604
1599486529.5884235	8	-7.25
1599487465.2256904	9	-6.493548393249512
1599488395.227323	10	-6.42972993850708
1599489323.3736408	11	-6.75
1599490251.9463375	12	-4.099999904632568
1599491190.1630502	13	-2.9048781394958496
1599492130.191282	14	-3.4194445610046387
1599493068.447803	15	-4.807499885559082
1599494003.8101575	16	-3.0435898303985596
1599494934.326629	17	-6.567857265472412
1599495884.177548	18	-4.051219463348389
1599496822.1954973	19	-4.297959327697754
1599497752.6811557	20	-3.1363637447357178
1599498685.655406	21	-2.918181896209717
1599499618.1369908	22	-3.340540647506714
1599500547.3985562	23	-2.9977777004241943
1599501473.5492728	24	-5.435714244842529
1599502397.9151444	25	-4.699999809265137
1599503322.0829806	26	-4.310526371002197
1599504234.0287611	27	-4.575555324554443
1599505151.3629947	28	-3.1116278171539307
1599506063.447065	29	-3.3657894134521484
1599506947.3504121	30	-3.8195652961730957
1599507838.1960187	31	-4.05555534362793
1599508722.505051	32	-5.017948627471924
1599509595.7737813	33	-5.4772725105285645
1599510474.9290874	34	-5.1421051025390625
1599511363.81351	35	-3.1433334350585938
1599512242.9318125	36	-4.800000190734863
1599513125.1402965	37	-3.972916603088379
1599514008.3844614	38	-4.354166507720947
1599514876.85483	39	-2.353658437728882
1599515766.2824814	40	-2.090697765350342
1599516660.663452	41	-2.3687500953674316
1599517559.908705	42	-3.172499895095825
1599518458.2873876	43	-3.0093023777008057
1599519364.5576255	44	-2.1414635181427
1599520273.96272	45	-1.8899999856948853
1599521159.6469839	46	-4.220512866973877
1599522035.487529	47	-3.5851852893829346
1599522920.9531164	48	-3.8794116973876953
1599523782.3139489	49	-4.460000038146973
1599524662.815715	50	-3.9452381134033203
1599525545.8976955	51	-2.8266665935516357
1599526420.2471657	52	-2.878124952316284
1599527297.2273448	53	-4.0980000495910645
1599528169.01805	54	-3.6604650020599365
1599529058.7120256	55	-3.829787254333496
1599529941.6340518	56	-1.8653061389923096
1599530835.385255	57	-3.834782600402832
1599531726.9274306	58	-4.2260870933532715
1599532615.6916404	59	-2.507317066192627
1599533478.5293627	60	-2.9774999618530273
1599534349.7169037	61	-4.5685715675354
1599535228.811204	62	-6.6181817054748535
1599536103.0527985	63	-4.941463470458984
1599536986.5765753	64	-5.185714244842529
1599537863.9961329	65	-3.2829267978668213
1599538729.5002074	66	-3.8363635540008545
1599539602.9094393	67	-1.2380952835083008
1599540457.9261117	68	-3.008333444595337
1599541307.3134878	69	-3.575000047683716
1599542158.3698735	70	-4.059259414672852
1599543013.5075302	71	-5.682499885559082
1599543865.6221843	72	-3.265517234802246
1599544722.9385517	73	-4.679999828338623
1599545570.608192	74	-3.3714284896850586
1599546428.3883622	75	-4.476922988891602
1599547296.7025614	76	-1.4071428775787354
1599548152.4806201	77	-2.6857142448425293
1599549008.2583432	78	-2.8813953399658203
1599549862.0897744	79	-5.2365851402282715
1599550726.7177484	80	-5.136170387268066
1599551580.3644912	81	-1.645714282989502
1599552426.8543441	82	-3.123076915740967
1599553275.1193035	83	-4.135714054107666
1599554107.8847518	84	-2.4034483432769775
1599554942.6837955	85	-3.4029412269592285
1599555769.019179	86	-4.193749904632568
1599556612.5818286	87	-2.7547619342803955
1599557464.7222152	88	-4.717647075653076
1599558324.4763317	89	-1.8026316165924072
1599559181.1429102	90	-4.2828569412231445
1599560031.9798377	91	-2.746511697769165
1599560889.8974333	92	-2.6583333015441895
1599561740.4901865	93	-3.299999952316284
1599562586.458662	94	-4.997674465179443
1599563269.2061007	95	-4.107142925262451
1599563941.9899669	96	-6.5652174949646
1599564588.319252	97	-6.259090900421143
1599565251.3400922	98	-5.224242210388184
1599565915.9441326	99	-4.893750190734863
1599566552.4037292	100	-2.555882453918457
