# Supplementary material
Source: ML conference proceedings conference paper supplement (https://proceedings.mlr.press/v139/rahman21a.html)
Supplement: Supplementary file 3 [file rahman21a-supp.zip › ICMLSupportingDoc 2/Visualization/OpenFortAttackRes/TRAIN/LSTM-RFM_test/run-rxgenpnipo-tag-Rewards_eval.csv]

Wall time	Step	Value
1599479044.2376173	0	-6.314285755157471
1599479972.8110428	1	-5.248571395874023
1599480900.4758902	2	-4.066666603088379
1599481829.482781	3	-6.313889026641846
1599482758.4010544	4	-4.936585426330566
1599483694.2582488	5	-5.333333492279053
1599484621.9182546	6	-5.025000095367432
1599485555.9451437	7	-5.088889122009277
1599486491.3719287	8	-5.333333492279053
1599487423.4147613	9	-5.273333549499512
1599488347.5233598	10	-5.995238304138184
1599489270.9510489	11	-5.276190280914307
1599490196.7433434	12	-7.866666793823242
1599491134.5979848	13	-4.03636360168457
1599492072.650151	14	-3.518749952316284
1599493003.6681492	15	-5.715555667877197
1599493926.307001	16	-4.199999809265137
1599494852.072564	17	-4.290909290313721
1599495786.6412725	18	-5.838889122009277
1599496722.443459	19	-5.375471591949463
1599497649.090142	20	-4.643750190734863
1599498584.6635132	21	-4.044000148773193
1599499513.705475	22	-1.4424242973327637
1599500438.5968995	23	-2.644444465637207
1599501360.7434094	24	-3.719444513320923
1599502279.8808374	25	-3.1657142639160156
1599503196.0662677	26	-2.8142857551574707
1599504112.0269783	27	-2.4755101203918457
1599505000.4875414	28	-3.502380847930908
1599505895.9786184	29	-2.2878787517547607
1599506781.3153934	30	-1.751612901687622
1599507668.7482927	31	-4.436363697052002
1599508547.4915628	32	-4.865384578704834
1599509408.0557106	33	-3.7536585330963135
1599510280.4671333	34	-3.8978261947631836
1599511156.2902884	35	-3.1340909004211426
1599512037.3447485	36	-2.5245282649993896
1599512909.7869158	37	-4.737500190734863
1599513783.004735	38	-3.197674512863159
1599514659.62886	39	-5.199999809265137
1599515532.1025252	40	-3.3785715103149414
1599516406.3477986	41	-3.047727346420288
1599517274.9279394	42	-1.7227272987365723
1599518148.4331734	43	-2.9342105388641357
1599519045.1222408	44	-2.9303030967712402
1599519956.7188876	45	-2.444444417953491
1599520857.5070689	46	-2.6052632331848145
1599521737.468218	47	-4.08775520324707
1599522627.5466645	48	-5.453571319580078
1599523512.5380542	49	-2.113725423812866
1599524383.5590124	50	-1.8195122480392456
1599525260.7401228	51	-3.6192307472229004
1599526133.3361654	52	-4.946511745452881
1599527008.1671987	53	-4.87954568862915
1599527884.3867154	54	-2.6812500953674316
1599528772.792362	55	-2.1244897842407227
1599529653.7794404	56	-4.206060409545898
1599530538.7215698	57	-1.8678570985794067
1599531416.5548952	58	-4.651351451873779
1599532294.7148023	59	-5.692857265472412
1599533158.4658966	60	-5.759459495544434
1599534029.4041107	61	-5.106382846832275
1599534884.6668515	62	-5.9666666984558105
1599535746.2974982	63	-5.260000228881836
1599536609.6306372	64	-2.3709676265716553
1599537463.0681856	65	-2.39393949508667
1599538308.496864	66	-3.765714168548584
1599539171.1458545	67	-4.556097507476807
1599540052.0433476	68	-2.6028571128845215
1599540927.008372	69	-5.27142858505249
1599541792.5992672	70	-4.892857074737549
1599542670.7372892	71	-5.036841869354248
1599543549.9741044	72	-2.8872339725494385
1599544417.849122	73	-4.1891303062438965
1599545280.9849093	74	-5.53125
1599546149.2997704	75	-4.992000102996826
1599547017.7365115	76	-6.711538314819336
1599547870.7098508	77	-3.028205156326294
1599548717.7992716	78	-3.781632661819458
1599549567.3415744	79	-1.1736842393875122
1599550429.895248	80	-3.170454502105713
1599551290.1113977	81	-6.449999809265137
1599552158.8111215	82	-4.52641487121582
1599553021.5940244	83	-4.758333206176758
1599553885.4840474	84	-2.7567567825317383
1599554758.51221	85	-4.937837600708008
1599555629.0832644	86	-7.591304302215576
1599556506.9689617	87	-3.771111011505127
1599557378.8215535	88	-5.065908908843994
1599558250.2861247	89	-5.900000095367432
1599559123.520747	90	-3.8682925701141357
1599559995.9832869	91	-3.7444443702697754
1599560855.1558547	92	-3.524444341659546
1599561711.2965646	93	-3.480769157409668
1599562580.183533	94	-3.0250000953674316
1599563371.7393856	95	-3.1456520557403564
1599564122.322715	96	-3.872727155685425
1599564837.2444167	97	-3.175757646560669
1599565558.9090505	98	-3.7419354915618896
1599566276.680842	99	-4.059999942779541
1599566844.2178738	100	-7.730434894561768
