# Supplementary material
Source: ML conference proceedings conference paper supplement (https://proceedings.mlr.press/v139/rahman21a.html)
Supplement: Supplementary file 3 [file rahman21a-supp.zip › ICMLSupportingDoc 2/Visualization/OpenFortAttackRes/TRAIN/LSTM-RFM_test/run-sbbrltrgix-tag-Rewards_eval.csv]

Wall time	Step	Value
1599479055.3616505	0	-4.80555534362793
1599479989.461126	1	-6.715000152587891
1599480924.019697	2	-6.400000095367432
1599481849.7033563	3	-7.872222423553467
1599482777.1800866	4	-6.5
1599483711.1022856	5	-4.186206817626953
1599484638.7708411	6	-6.341304302215576
1599485576.0296788	7	-5.062857151031494
1599486526.2561316	8	-6.557142734527588
1599487459.4999974	9	-5.4882354736328125
1599488394.2577217	10	-4.363157749176025
1599489325.1940541	11	-5.139583110809326
1599490257.491528	12	-4.4489359855651855
1599491187.7848115	13	-2.8648648262023926
1599492129.3551533	14	-3.3735294342041016
1599493065.27379	15	-4.074999809265137
1599493991.111133	16	-3.9739129543304443
1599494913.7786083	17	-4.665217399597168
1599495852.3359938	18	-3.4870967864990234
1599496783.4123666	19	-3.8777778148651123
1599497709.8906558	20	-1.6057143211364746
1599498639.3822162	21	-2.8687500953674316
1599499563.8787448	22	-2.2071428298950195
1599500489.1103392	23	-1.1390243768692017
1599501409.050585	24	-3.674074172973633
1599502329.1539881	25	-1.600000023841858
1599503235.7437153	26	-2.028571367263794
1599504121.5143237	27	-6.148837089538574
1599504978.228505	28	-4.5651164054870605
1599505850.3634655	29	-3.953488349914551
1599506721.540046	30	-2.674074172973633
1599507596.8689084	31	-5.527500152587891
1599508468.0321016	32	-4.076595783233643
1599509324.85052	33	-4.9083333015441895
1599510202.2657475	34	-3.8424999713897705
1599511071.7763412	35	-4.815384387969971
1599511954.544447	36	-4.797727108001709
1599512825.071785	37	-4.566666603088379
1599513694.3724148	38	-3.6368420124053955
1599514553.0435302	39	-6.057575702667236
1599515409.0011063	40	-4.568749904632568
1599516252.3504167	41	-4.947727203369141
1599517094.0936852	42	-5.036110877990723
1599517928.924906	43	-4.320408344268799
1599518752.9865892	44	-3.9589743614196777
1599519561.3472917	45	-4.0117645263671875
1599520360.4748619	46	-5.940000057220459
1599521195.7543738	47	-6.537837982177734
1599522046.0791833	48	-7.474999904632568
1599522890.813317	49	-4.460869789123535
1599523751.054414	50	-5.443999767303467
1599524605.7179475	51	-4.509523868560791
1599525460.6057856	52	-5.04878044128418
1599526315.673545	53	-5.418181896209717
1599527166.6792536	54	-4.760000228881836
1599528029.0882232	55	-5.831578731536865
1599528893.3891509	56	-5.728125095367432
1599529758.6010566	57	-3.034883737564087
1599530612.8947303	58	-5.219511985778809
1599531471.169738	59	-5.2228569984436035
1599532318.9482808	60	-1.3447368144989014
1599533173.131809	61	-2.8216216564178467
1599534027.0206296	62	-2.444444417953491
1599534896.114681	63	-3.5999999046325684
1599535758.2506447	64	-2.645238161087036
1599536621.1184144	65	-4.043749809265137
1599537472.5008295	66	-5.287499904632568
1599538335.61212	67	-4.066666603088379
1599539212.7650695	68	-3.5
1599540082.6088016	69	-3.1552631855010986
1599540955.10859	70	-4.234090805053711
1599541835.450564	71	-6.480487823486328
1599542711.2231095	72	-5.717948913574219
1599543576.6559033	73	-4.848387241363525
1599544449.6239324	74	-1.8571428060531616
1599545303.3744566	75	-1.792307734489441
1599546173.1097522	76	-4.80731725692749
1599547044.0160096	77	-3.7514286041259766
1599547911.372897	78	-5.645161151885986
1599548784.0647044	79	-2.606818199157715
1599549653.699762	80	-3.653658628463745
1599550524.9308693	81	-4.199999809265137
1599551398.98504	82	-6.580952167510986
1599552275.7112577	83	-2.878260850906372
1599553134.4244058	84	-4.504878044128418
1599554007.1690264	85	-3.799999952316284
1599554875.277258	86	-2.799999952316284
1599555768.5528584	87	-3.3674418926239014
1599556649.7328386	88	-0.8086956739425659
1599557520.6084173	89	-3.1365854740142822
1599558395.7237015	90	-3.409374952316284
1599559262.0705044	91	-3.4909090995788574
1599560139.5454087	92	-3.393749952316284
1599560989.851294	93	-4.980487823486328
1599561861.4451537	94	-4.984848499298096
1599562706.5920033	95	-1.8807692527770996
1599563488.0513413	96	-3.841379404067993
1599564228.82685	97	-4.084374904632568
1599564950.285998	98	-4.981578826904297
1599565678.5189872	99	-2.4200000762939453
1599566406.470623	100	-2.538461446762085
