# Supplementary material
Source: ML conference proceedings conference paper supplement (https://proceedings.mlr.press/v139/rahman21a.html)
Supplement: Supplementary file 3 [file rahman21a-supp.zip › ICMLSupportingDoc 2/Visualization/OpenFortAttackRes/TRAIN/LSTM/run-adwclsctqk-tag-Rewards_train_set.csv]

Wall time	Step	Value
1599477156.8127646	0	-6.895833492279053
1599477769.6365805	1	-7.7272725105285645
1599478389.9658718	2	-5.395349025726318
1599479005.6956306	3	-6.4679999351501465
1599479614.4813132	4	-4.455555438995361
1599480230.720075	5	-6.179999828338623
1599480850.0834017	6	-8.559523582458496
1599481478.2613654	7	-6.730769157409668
1599482100.838506	8	-6.703225612640381
1599482723.5155716	9	-4.339534759521484
1599483347.6430187	10	-4.695652008056641
1599483969.033659	11	-4.959523677825928
1599484587.506514	12	-4.635135173797607
1599485204.9174094	13	-4.670000076293945
1599485816.7950776	14	-4.731578826904297
1599486427.795234	15	-4.252500057220459
1599487032.03516	16	-2.972093105316162
1599487629.63574	17	-3.6388888359069824
1599488244.8099597	18	-2.808333396911621
1599488844.7171695	19	-5.4268293380737305
1599489441.5648859	20	-4.778947353363037
1599490039.3207676	21	-1.4160000085830688
1599490639.448344	22	-4.525000095367432
1599491235.34649	23	-3.90625
1599491836.2814658	24	-4.599999904632568
1599492429.800203	25	-2.8363635540008545
1599493019.7718809	26	-2.7461538314819336
1599493623.6943045	27	-4.355555534362793
1599494224.2650342	28	-5.462162017822266
1599494821.3034348	29	-3.6777777671813965
1599495410.3187442	30	-5.04594612121582
1599496021.258929	31	-1.8320000171661377
1599496614.836893	32	-0.8714285492897034
1599497204.8253353	33	-3.200000047683716
1599497805.8648138	34	-0.817307710647583
1599498413.570262	35	-2.082857131958008
1599499014.172641	36	-3.1268293857574463
1599499612.469614	37	-3.088235378265381
1599500209.194181	38	-5.880000114440918
1599500788.068179	39	-0.3906976878643036
1599501379.807639	40	-4.691891670227051
1599501977.7055783	41	-4.580851078033447
1599502571.0928726	42	-1.8323529958724976
1599503163.2822993	43	-3.694999933242798
1599503742.9005966	44	-2.8904762268066406
1599504327.2988148	45	-3.880000114440918
1599504908.455468	46	-4.082353115081787
1599505490.0536544	47	-4.09512186050415
1599506085.3317719	48	-4.532557964324951
1599506674.701528	49	-1.9115384817123413
1599507258.3933773	50	-2.5042552947998047
1599507841.3306587	51	-4.296000003814697
1599508426.4522212	52	-3.7571427822113037
1599509007.2458222	53	-2.4891891479492188
1599509590.1680453	54	-2.2645833492279053
1599510183.9123173	55	-4.464705944061279
1599510765.539356	56	-0.8354838490486145
1599511347.6105628	57	-2.2727272510528564
1599511926.232798	58	-2.8102564811706543
1599512517.366841	59	-1.3771929740905762
1599513093.8955345	60	-2.299999952316284
1599513679.0221655	61	-2.890566110610962
1599514258.717217	62	-2.7714285850524902
1599514841.8060317	63	-3.343902349472046
1599515438.0811973	64	-1.7416666746139526
1599516010.3214564	65	-4.236734867095947
1599516578.278122	66	-0.9032257795333862
1599517173.0569942	67	-3.480487823486328
1599517759.7541592	68	-1.0324324369430542
1599518330.7351682	69	-4.824999809265137
1599518920.519532	70	-2.696296215057373
1599519525.7050474	71	-4.062222003936768
1599520114.1593516	72	-4.03636360168457
1599520684.405179	73	-1.9166666269302368
1599521260.1466882	74	-1.5
1599521845.8743372	75	-3.5742857456207275
1599522432.9343374	76	-1.4731707572937012
1599523016.8376458	77	-2.1473684310913086
1599523599.68474	78	-4.178260803222656
1599524187.764308	79	-4.76808500289917
1599524773.2661488	80	-3.682857036590576
1599525355.9737997	81	-0.7685714364051819
1599525944.5045152	82	-4.800000190734863
1599526525.0839713	83	-5.103703498840332
1599527101.6570678	84	0.2760869562625885
1599527685.5273762	85	-3.0214285850524902
1599528262.0980966	86	-2.8415093421936035
1599528844.5830944	87	-3.0137929916381836
1599529435.0317445	88	-2.608928680419922
1599530029.8103964	89	-1.8857142925262451
1599530614.6866677	90	-2.961111068725586
1599531193.6872773	91	-2.4749999046325684
1599531775.2437654	92	-2.752631664276123
1599532364.670289	93	-2.1157894134521484
1599532964.909646	94	0.0886363610625267
1599533544.9971745	95	-2.5171427726745605
1599534132.4964528	96	-2.489473581314087
1599534727.5626059	97	-2.700000047683716
1599535304.4855504	98	-3.3606059551239014
1599535766.8852816	99	-4.333333492279053
1599536123.3653562	100	-3.2071428298950195
