# Supplementary material
Source: ML conference proceedings conference paper supplement (https://proceedings.mlr.press/v139/rahman21a.html)
Supplement: Supplementary file 3 [file rahman21a-supp.zip › ICMLSupportingDoc 2/Visualization/OpenFortAttackRes/TRAIN/LSTM/run-aiviwcbbvl-tag-Rewards_train_set.csv]

Wall time	Step	Value
1599477143.088128	0	-6.8575758934021
1599477751.7004306	1	-6.787499904632568
1599478367.9519172	2	-8.219148635864258
1599478979.0512586	3	-6.794117450714111
1599479582.2977078	4	-6.337931156158447
1599480187.8388312	5	-7.690908908843994
1599480798.7115195	6	-6.5428571701049805
1599481415.9580698	7	-4.5
1599482033.30807	8	-4.455555438995361
1599482639.1236234	9	-5.41034460067749
1599483245.1658404	10	-5.604650974273682
1599483856.4628026	11	-4.701960563659668
1599484455.9162164	12	-3.2571427822113037
1599485063.3215504	13	-2.6583333015441895
1599485680.5101156	14	-5.679411888122559
1599486291.350163	15	-5.89722204208374
1599486892.7648487	16	-3.8307693004608154
1599487500.7817156	17	-3.369999885559082
1599488101.3731203	18	-4.785294055938721
1599488709.7768297	19	-2.113725423812866
1599489308.8331661	20	-3.4800000190734863
1599489924.210609	21	-2.8617022037506104
1599490535.2712076	22	-4.089130401611328
1599491142.824882	23	-0.365217387676239
1599491733.5715284	24	-3.682499885559082
1599492316.697803	25	-6.559999942779541
1599492899.8639774	26	-2.802438974380493
1599493492.7733657	27	-2.851351261138916
1599494093.3239846	28	-1.6888889074325562
1599494682.204322	29	-5.612820625305176
1599495272.3838696	30	-4.27142858505249
1599495856.8034618	31	-3.762500047683716
1599496442.1193674	32	-3.512765884399414
1599497026.248368	33	-3.0512821674346924
1599497622.7195113	34	-3.430555582046509
1599498224.3884404	35	-3.7139534950256348
1599498814.6177204	36	-2.4627907276153564
1599499413.7249112	37	-3.9177777767181396
1599500007.6088536	38	-4.730952262878418
1599500596.1176114	39	-4.0970587730407715
1599501188.284641	40	-2.5176470279693604
1599501771.8167377	41	-2.590909004211426
1599502360.597273	42	-3.140000104904175
1599502952.8404047	43	-3.8526315689086914
1599503543.057606	44	-2.066666603088379
1599504134.462438	45	-4.53249979019165
1599504722.0879517	46	-3.8975000381469727
1599505307.8507526	47	-4.442500114440918
1599505897.7919638	48	-5.512244701385498
1599506476.6903958	49	-0.9654545187950134
1599507057.910759	50	-2.3440001010894775
1599507637.9838197	51	-4.111111164093018
1599508218.242601	52	-2.3473684787750244
1599508790.6952832	53	-2.829411745071411
1599509363.6221201	54	-4.965116500854492
1599509947.807316	55	-1.6733332872390747
1599510521.3554265	56	-3.3740739822387695
1599511103.8647323	57	-0.3682926893234253
1599511689.4970672	58	-2.088371992111206
1599512279.5163171	59	-3.5450000762939453
1599512856.9369502	60	-2.25
1599513441.824172	61	-2.752941131591797
1599514019.0716627	62	-3.938235282897949
1599514594.9165142	63	-1.6130434274673462
1599515181.2304409	64	-5.5
1599515773.638393	65	-3.8529412746429443
1599516367.3958933	66	-0.5199999809265137
1599516946.653824	67	-0.6527777910232544
1599517531.8013868	68	-4.17714262008667
1599518123.7607112	69	-2.4666666984558105
1599518700.2225618	70	-3.8523809909820557
1599519280.1864743	71	-3.331818103790283
1599519865.3389146	72	-3.2720930576324463
1599520456.8627968	73	-1.6807692050933838
1599521049.3980212	74	-2.7676470279693604
1599521632.2942421	75	-3.747826099395752
1599522230.1571584	76	-2.1500000953674316
1599522829.1640258	77	-1.921276569366455
1599523420.7389245	78	-4.441860675811768
1599524009.4090595	79	-2.956756830215454
1599524599.9126868	80	-2.7838709354400635
1599525199.3180466	81	-3.0280001163482666
1599525788.0876615	82	-2.5956521034240723
1599526386.2440426	83	-2.6119048595428467
1599526969.9520922	84	-1.9527777433395386
1599527560.3243535	85	-4.428301811218262
1599528146.750343	86	-2.0810811519622803
1599528722.5690684	87	-1.0342856645584106
1599529306.1936414	88	-3.9119999408721924
1599529892.8624747	89	-5.278571605682373
1599530475.7627814	90	-2.2733333110809326
1599531053.6397727	91	-1.4479999542236328
1599531632.7493854	92	-3.2634146213531494
1599532204.3408144	93	-6.699999809265137
1599532793.510692	94	-4.382857322692871
1599533386.5790522	95	-3.0860464572906494
1599533960.626922	96	-3.954545497894287
1599534541.9902284	97	-2.6769230365753174
1599535118.1903734	98	-2.6764705181121826
1599535666.079647	99	-2.3465116024017334
1599536115.177492	100	-2.6677420139312744
