# Supplementary material
Source: ML conference proceedings conference paper supplement (https://proceedings.mlr.press/v139/rahman21a.html)
Supplement: Supplementary file 3 [file rahman21a-supp.zip › ICMLSupportingDoc 2/Visualization/OpenFortAttackRes/TRAIN/LSTM/run-ewywycsjuj-tag-Rewards_train_set.csv]

Wall time	Step	Value
1599477143.913889	0	-5.361111164093018
1599477747.7003193	1	-5.351724147796631
1599478356.2596173	2	-6.858333110809326
1599478968.2194898	3	-8.38599967956543
1599479556.99518	4	-6.106451511383057
1599480154.8340254	5	-4.78125
1599480756.3457057	6	-4.412499904632568
1599481353.7137794	7	-7.407317161560059
1599481947.5864885	8	-5.179999828338623
1599482542.8902707	9	-5.431707382202148
1599483128.929006	10	-5.243243217468262
1599483714.5124712	11	-4.9282050132751465
1599484298.5602536	12	-4.240540504455566
1599484882.8835356	13	-6.534375190734863
1599485470.666912	14	-6.599999904632568
1599486056.5037224	15	-3.3214285373687744
1599486640.7101612	16	-5.388888835906982
1599487225.5354538	17	-5.408695697784424
1599487805.1475537	18	-5.953571319580078
1599488384.996577	19	-4.036110877990723
1599488956.356909	20	-5.090624809265137
1599489533.0112028	21	-2.5428571701049805
1599490100.5762656	22	-5.134146213531494
1599490670.915302	23	-4.309756278991699
1599491232.612601	24	-3.002000093460083
1599491807.165793	25	-5.673170566558838
1599492384.816271	26	-4.169696807861328
1599492968.2230027	27	-4.620408058166504
1599493555.312206	28	-5.597560882568359
1599494135.8869016	29	-0.41428571939468384
1599494720.7484226	30	-4.05384635925293
1599495313.0457537	31	-3.2407407760620117
1599495903.7746797	32	-4.800000190734863
1599496489.348044	33	-2.8333332538604736
1599497079.6183946	34	-4.261290550231934
1599497666.9515743	35	-3.370175361633301
1599498241.1894338	36	-3.039130449295044
1599498816.8278377	37	-3.406818151473999
1599499400.658893	38	-1.824324369430542
1599499983.988499	39	-3.609999895095825
1599500560.4736955	40	-2.2756097316741943
1599501136.0427268	41	-4.327026844024658
1599501713.5196488	42	-4.446808338165283
1599502299.5891821	43	-3.04489803314209
1599502873.222375	44	-3.482926845550537
1599503445.0177991	45	-4.459615230560303
1599504014.415118	46	-3.433333396911621
1599504587.0256722	47	-4.385185241699219
1599505173.3941193	48	-4.0820512771606445
1599505741.357358	49	-2.2093749046325684
1599506320.472763	50	-4.793749809265137
1599506904.7377563	51	-2.519047737121582
1599507493.2461236	52	-3.566666603088379
1599508068.1058466	53	-4.371110916137695
1599508658.7403758	54	-0.7620000243186951
1599509251.6971767	55	-3.7756757736206055
1599509836.9928362	56	-2.4960784912109375
1599510419.0223308	57	-6.589473724365234
1599511002.6889331	58	-2.807692289352417
1599511599.950178	59	-1.5803921222686768
1599512176.5967066	60	-1.529411792755127
1599512769.2457151	61	-2.9208333492279053
1599513350.9500625	62	-2.501923084259033
1599513932.6078722	63	-4.390244007110596
1599514520.6268327	64	-3.9911763668060303
1599515099.080934	65	-1.737837791442871
1599515675.2988968	66	-3.9073171615600586
1599516263.8495483	67	-1.9574073553085327
1599516850.0432494	68	0.26875001192092896
1599517421.3154802	69	-2.0512194633483887
1599517996.9230843	70	-4.572500228881836
1599518587.2694836	71	-3.408571481704712
1599519176.7477975	72	-2.354761838912964
1599519745.2543414	73	-4.3297295570373535
1599520295.3113956	74	-2.481579065322876
1599520850.3136559	75	-1.687804937362671
1599521422.663633	76	-3.5838708877563477
1599521979.908742	77	-4.413157939910889
1599522544.1020536	78	-3.013636350631714
1599523110.2132103	79	-4.72820520401001
1599523686.5356202	80	-4.288571357727051
1599524261.0481122	81	-4.523684024810791
1599524836.069472	82	-0.9956521987915039
1599525415.4085696	83	-2.1648647785186768
1599525976.3856146	84	-1.5846153497695923
1599526546.921989	85	-3.0484848022460938
1599527114.1038206	86	-1.3388888835906982
1599527683.8677063	87	-3.1631579399108887
1599528261.2635138	88	-0.7696969509124756
1599528837.1702101	89	-3.4960784912109375
1599529412.7753527	90	-4.047500133514404
1599529990.3356638	91	-1.015254259109497
1599530570.2734833	92	-1.2999999523162842
1599531158.7553587	93	-2.9914286136627197
1599531741.9986205	94	-3.5222222805023193
1599532329.1846664	95	-2.8263158798217773
1599532900.0175476	96	-1.921739101409912
1599533487.6492848	97	-2.512963056564331
1599534071.9339669	98	-4.745652198791504
1599534672.704436	99	-1.9952380657196045
1599535268.4675944	100	-1.3043478727340698
