# Supplementary material
Source: ML conference proceedings conference paper supplement (https://proceedings.mlr.press/v139/rahman21a.html)
Supplement: Supplementary file 3 [file rahman21a-supp.zip › ICMLSupportingDoc 2/Visualization/OpenFortAttackRes/TRAIN/LSTM/run-gqtstkdnvc-tag-Rewards_train_set.csv]

Wall time	Step	Value
1599477151.9448197	0	-7.5217390060424805
1599477757.2099142	1	-7.042553424835205
1599478358.634332	2	-6.8684210777282715
1599478954.2459161	3	-7.588889122009277
1599479543.5133739	4	-5.805882453918457
1599480142.2473881	5	-6.652631759643555
1599480741.7574732	6	-8.369767189025879
1599481339.4779673	7	-6.19487190246582
1599481944.7750764	8	-6.419047832489014
1599482540.8130395	9	-4.40256404876709
1599483133.600113	10	-4.704651355743408
1599483726.4115603	11	-5.434999942779541
1599484316.7437975	12	-4.8807692527771
1599484917.3021932	13	-5.240740776062012
1599485519.7716293	14	-5.077777862548828
1599486111.8487854	15	-3.7699999809265137
1599486692.4480655	16	-4.780952453613281
1599487279.7433922	17	-2.0794870853424072
1599487870.1132393	18	-2.8523809909820557
1599488452.3677945	19	-4.511111259460449
1599489036.8349717	20	-4.827272891998291
1599489638.0454264	21	-4.763043403625488
1599490220.3936412	22	-4.525640964508057
1599490809.4621472	23	-5.0714287757873535
1599491397.146116	24	-3.528571367263794
1599491997.9061923	25	-4.108889102935791
1599492601.3346617	26	-3.450000047683716
1599493198.9343472	27	-2.7068965435028076
1599493795.6613007	28	-1.9880000352859497
1599494395.3529656	29	-2.898113250732422
1599494993.0520005	30	-3.8372092247009277
1599495601.1272206	31	-3.084848403930664
1599496209.1336565	32	-3.7324323654174805
1599496809.5757768	33	-6.045714378356934
1599497414.7388723	34	-5.12954568862915
1599498018.6509285	35	-3.23421049118042
1599498615.5904205	36	-2.939393997192383
1599499207.933554	37	-3.9314286708831787
1599499806.9711142	38	-3.700000047683716
1599500386.7296515	39	-0.9419354796409607
1599500976.4986372	40	-4.720512866973877
1599501570.9020154	41	-0.9469387531280518
1599502160.6341622	42	-4.445945739746094
1599502742.540895	43	-3.196969747543335
1599503316.5680315	44	-2.9896552562713623
1599503901.961656	45	-3.9069766998291016
1599504487.513363	46	-3.4861111640930176
1599505070.7839932	47	-3.9593749046325684
1599505666.9675076	48	-1.9954545497894287
1599506255.874122	49	-3.6794872283935547
1599506842.5576656	50	-1.162500023841858
1599507431.5549855	51	-1.7178571224212646
1599508019.8745856	52	-5.441999912261963
1599508608.1019142	53	-8.310525894165039
1599509194.8570883	54	-1.5191489458084106
1599509787.9819794	55	-4.171739101409912
1599510370.9552917	56	-5.504878044128418
1599510957.920439	57	-3.4066667556762695
1599511553.6885996	58	-3.1145832538604736
1599512139.2463188	59	-4.287179470062256
1599512725.399497	60	-4.905714511871338
1599513318.3000805	61	-2.0171427726745605
1599513907.692423	62	-2.3935484886169434
1599514507.1173465	63	-5.182608604431152
1599515094.0062792	64	-3.474074125289917
1599515678.6541479	65	-3.9749999046325684
1599516243.232183	66	-4.166666507720947
1599516828.5208597	67	-2.829545497894287
1599517416.74455	68	-4.012820720672607
1599517977.7175741	69	-2.0
1599518559.3691978	70	-3.325714349746704
1599519151.4435923	71	-2.7173912525177
1599519747.260575	72	-3.457575798034668
1599520320.386858	73	-2.4408164024353027
1599520887.0993378	74	-3.5166666507720947
1599521464.1570034	75	-2.4939393997192383
1599522038.9319968	76	-5.132352828979492
1599522612.5411012	77	-1.7565217018127441
1599523199.6268423	78	-3.4743590354919434
1599523781.9374056	79	-3.3523809909820557
1599524370.1322753	80	-1.2717949151992798
1599524944.8579166	81	-2.9749999046325684
1599525530.7265494	82	-4.2292680740356445
1599526100.6562636	83	-1.5838710069656372
1599526676.8716397	84	-2.747727155685425
1599527262.882245	85	-3.0526316165924072
1599527853.514858	86	-3.1410255432128906
1599528433.5764482	87	-4.2727274894714355
1599529024.3039234	88	-3.4514286518096924
1599529610.743776	89	-2.509999990463257
1599530201.2220135	90	-2.4040000438690186
1599530785.1668715	91	-3.769230842590332
1599531376.3912494	92	-2.8611111640930176
1599531967.9431763	93	-3.7846152782440186
1599532572.6698499	94	-2.062162160873413
1599533164.4244728	95	-3.9311110973358154
1599533751.9159255	96	-0.550000011920929
1599534342.4321873	97	-1.9117647409439087
1599534923.9682596	98	-3.2512195110321045
1599535480.981823	99	-3.7807693481445312
1599535925.0052848	100	-2.0485713481903076
