# Supplementary material
Source: ML conference proceedings conference paper supplement (https://proceedings.mlr.press/v139/rahman21a.html)
Supplement: Supplementary file 3 [file rahman21a-supp.zip › ICMLSupportingDoc 2/Visualization/OpenFortAttackRes/TRAIN/LSTM/run-hbulgxtzpv-tag-Rewards_train_set.csv]

Wall time	Step	Value
1599477147.9003785	0	-8.024999618530273
1599477757.7670672	1	-6.504761695861816
1599478367.8098288	2	-5.544117450714111
1599478966.8940985	3	-7.5619049072265625
1599479570.4547071	4	-5.976922988891602
1599480172.3309295	5	-6.667567729949951
1599480775.9021056	6	-6.910810947418213
1599481384.2679384	7	-7.139999866485596
1599481997.2841527	8	-5.144444465637207
1599482605.8739967	9	-4.182000160217285
1599483211.7956018	10	-4.132727146148682
1599483817.7157204	11	-6.523255825042725
1599484426.0102146	12	-3.4882352352142334
1599485031.523154	13	-1.1409090757369995
1599485645.3578382	14	-4.842857360839844
1599486257.4026196	15	-4.168085098266602
1599486856.3835025	16	-6.71999979019165
1599487465.1024845	17	-3.97560977935791
1599488078.2222054	18	-3.9210526943206787
1599488680.413505	19	-2.0333333015441895
1599489286.7901816	20	-5.636842250823975
1599489896.1634336	21	-2.2542858123779297
1599490505.5943413	22	-3.816128969192505
1599491115.3903227	23	-3.6045453548431396
1599491709.674772	24	-4.453125
1599492294.0400016	25	-5.137499809265137
1599492883.782725	26	-2.049999952316284
1599493476.984404	27	-0.4394736886024475
1599494065.4663212	28	-3.102222204208374
1599494650.4534326	29	-3.990476131439209
1599495233.4793704	30	-2.2981481552124023
1599495813.2974198	31	-3.671428680419922
1599496388.169418	32	-3.4636363983154297
1599496970.7774909	33	-3.4647059440612793
1599497554.0582426	34	-3.702777862548828
1599498145.6200664	35	-2.075000047683716
1599498726.4012864	36	-3.200000047683716
1599499301.2866054	37	-2.3227272033691406
1599499882.7434447	38	-3.9414634704589844
1599500468.7037327	39	-3.397916555404663
1599501055.01219	40	-4.304878234863281
1599501647.2165349	41	-2.5743589401245117
1599502235.2815585	42	-2.4895832538604736
1599502830.73564	43	-1.694000005722046
1599503423.8678741	44	-2.8545453548431396
1599504014.4148455	45	-7.652631759643555
1599504602.4896324	46	-1.4979166984558105
1599505186.9293046	47	-4.288372039794922
1599505781.022051	48	-2.325000047683716
1599506365.812971	49	-2.881999969482422
1599506947.1343534	50	-3.020512819290161
1599507531.8859835	51	-2.80930233001709
1599508119.296194	52	-2.605128288269043
1599508703.6149693	53	-1.958823561668396
1599509284.8713782	54	-2.5395348072052
1599509868.5789073	55	-2.4727272987365723
1599510449.0392199	56	-2.769444465637207
1599511031.6574244	57	-4.335134983062744
1599511617.1301632	58	-1.7051281929016113
1599512201.5411098	59	-1.503999948501587
1599512786.7588892	60	-2.9693877696990967
1599513380.6487107	61	-1.7372548580169678
1599513958.6895502	62	-3.132432460784912
1599514540.2501948	63	-7.595454692840576
1599515132.059419	64	-4.986111164093018
1599515723.0389526	65	-4.123809337615967
1599516315.0739791	66	-1.356521725654602
1599516900.5983021	67	-4.583870887756348
1599517493.2742703	68	-4.495744705200195
1599518072.1886222	69	-0.9902439117431641
1599518649.2193105	70	-1.3785713911056519
1599519228.0754323	71	-1.513157844543457
1599519809.5354583	72	-4.105405330657959
1599520401.0858922	73	-4.559999942779541
1599520995.4348547	74	-3.2076923847198486
1599521578.6676898	75	-2.4304347038269043
1599522163.5479562	76	-2.437142848968506
1599522756.1849682	77	-4.144680976867676
1599523348.6434927	78	0.22499999403953552
1599523925.5672457	79	-2.721621513366699
1599524506.5582745	80	-5.111428737640381
1599525094.0117936	81	-4.9041666984558105
1599525676.6774726	82	-1.0244897603988647
1599526273.550524	83	-2.7444443702697754
1599526854.1384807	84	-1.1755101680755615
1599527430.0623004	85	-2.6212120056152344
1599528000.0392146	86	-2.051851749420166
1599528570.346687	87	-2.9571428298950195
1599529143.3437946	88	-1.8479167222976685
1599529716.6014264	89	-1.8633333444595337
1599530288.6535223	90	-0.6903225779533386
1599530854.5097957	91	-1.8844444751739502
1599531415.7958307	92	0.3340425491333008
1599531988.6907423	93	-1.1071428060531616
1599532564.654999	94	-1.5277777910232544
1599533139.2009447	95	-2.441025733947754
1599533711.2108433	96	-2.7567567825317383
1599534277.0766535	97	-3.0468084812164307
1599534844.7900348	98	-2.841463327407837
1599535408.5077965	99	-2.4727272987365723
1599535911.2353609	100	-7.305263042449951
