# Supplementary material
Source: ML conference proceedings conference paper supplement (https://proceedings.mlr.press/v139/rahman21a.html)
Supplement: Supplementary file 3 [file rahman21a-supp.zip › ICMLSupportingDoc 2/Visualization/OpenFortAttackRes/TRAIN/LSTM/run-jkgwdlszub-tag-Rewards_train_set.csv]

Wall time	Step	Value
1599477144.3017552	0	-7.0
1599477739.202816	1	-7.65675687789917
1599478338.2873409	2	-6.565714359283447
1599478933.56499	3	-4.7076921463012695
1599479526.3720667	4	-8.763636589050293
1599480120.545478	5	-7.776666641235352
1599480720.3377802	6	-7.172727108001709
1599481308.2462788	7	-6.538095474243164
1599481900.9720886	8	-6.387754917144775
1599482485.7950697	9	-3.854285717010498
1599483072.7755446	10	-4.182499885559082
1599483660.1124268	11	-5.23421049118042
1599484247.6247184	12	-6.521874904632568
1599484831.8359628	13	-3.7820513248443604
1599485417.7629566	14	-5.648275852203369
1599485999.009925	15	-5.561764717102051
1599486575.24607	16	-5.078571319580078
1599487148.1307714	17	-2.6064515113830566
1599487725.7594857	18	-2.262500047683716
1599488299.8153644	19	-5.175510406494141
1599488876.6892874	20	-4.059523582458496
1599489458.1748004	21	-4.285366058349609
1599490032.1333098	22	-3.876923084259033
1599490616.2245688	23	-1.962499976158142
1599491191.7826438	24	-4.082353115081787
1599491772.6702492	25	-1.1749999523162842
1599492369.6345122	26	-3.69777774810791
1599492964.296002	27	-5.219444274902344
1599493555.5434859	28	-3.8026316165924072
1599494147.6740813	29	-2.53947377204895
1599494745.3388295	30	-2.8789472579956055
1599495351.3887255	31	-2.9177777767181396
1599495950.500508	32	-1.4270833730697632
1599496538.6853216	33	-2.8270270824432373
1599497137.6983619	34	-3.937142848968506
1599497732.9463665	35	-3.661764621734619
1599498324.8983188	36	-3.009999990463257
1599498919.58378	37	-5.151724338531494
1599499509.3691125	38	-1.7722222805023193
1599500096.1514502	39	-4.887499809265137
1599500694.2122474	40	-1.056249976158142
1599501287.2233872	41	-3.0
1599501883.834956	42	-3.6095237731933594
1599502473.9893212	43	-3.1255319118499756
1599503069.1416752	44	-1.6833332777023315
1599503650.6498384	45	-4.435714244842529
1599504239.7575626	46	-0.05666666850447655
1599504825.7587965	47	-4.27222204208374
1599505418.8767116	48	-4.9425530433654785
1599506005.5837343	49	-3.8604166507720947
1599506596.898647	50	-1.9444444179534912
1599507182.7698805	51	-2.509756088256836
1599507755.5586472	52	-2.7249999046325684
1599508331.2536922	53	-1.5305556058883667
1599508909.60549	54	-3.8789472579956055
1599509502.9650817	55	-5.809999942779541
1599510076.337527	56	-2.3947367668151855
1599510659.741806	57	-3.9733333587646484
1599511244.8941426	58	-3.897674322128296
1599511832.4201257	59	-1.9657143354415894
1599512412.2631664	60	-5.489189147949219
1599512981.0723903	61	-4.442105293273926
1599513551.6168158	62	-2.390909194946289
1599514138.3100977	63	-4.547222137451172
1599514723.404644	64	-2.786956548690796
1599515285.0312905	65	-3.5545454025268555
1599515845.8173752	66	-2.127450942993164
1599516413.4352682	67	-4.296428680419922
1599517000.071561	68	-3.4418604373931885
1599517574.1815913	69	-1.377419352531433
1599518152.2366798	70	-1.191304326057434
1599518731.2912285	71	-4.9588236808776855
1599519313.2376018	72	-3.5428571701049805
1599519884.2662647	73	-2.9814815521240234
1599520450.9442754	74	-2.5714285373687744
1599521017.0012693	75	-7.422222137451172
1599521591.5104902	76	-2.4600000381469727
1599522155.5665743	77	-4.851351261138916
1599522715.9513757	78	-7.284615516662598
1599523283.228186	79	-2.9793102741241455
1599523866.8853762	80	-3.953488349914551
1599524445.3274627	81	-3.170212745666504
1599525029.5511656	82	-2.21052622795105
1599525605.6457992	83	-3.781081199645996
1599526173.215224	84	-1.1699999570846558
1599526750.3698041	85	-1.2947368621826172
1599527321.2633564	86	-4.023684024810791
1599527897.9912758	87	-2.4533333778381348
1599528483.8849592	88	-1.76285719871521
1599529071.0716407	89	-3.4488887786865234
1599529655.5193348	90	-3.0649123191833496
1599530235.7843614	91	-2.255000114440918
1599530826.2288995	92	-4.7076921463012695
1599531413.2224755	93	-2.825000047683716
1599532014.402922	94	0.31702128052711487
1599532590.440054	95	-5.179999828338623
1599533170.3571825	96	-3.9191489219665527
1599533758.523667	97	-3.1953487396240234
1599534346.662692	98	-2.8519999980926514
1599534930.7189634	99	-2.546875
1599535490.846408	100	-2.674999952316284
