# Supplementary material
Source: ML conference proceedings conference paper supplement (https://proceedings.mlr.press/v139/rahman21a.html)
Supplement: Supplementary file 3 [file rahman21a-supp.zip › ICMLSupportingDoc 2/Visualization/OpenFortAttackRes/TRAIN/LSTM/run-qqqvkconlw-tag-Rewards_train_set.csv]

Wall time	Step	Value
1599477145.1033397	0	-4.340909004211426
1599477764.4048305	1	-5.803999900817871
1599478386.406465	2	-6.527083396911621
1599479000.57533	3	-7.19523811340332
1599479616.1182067	4	-6.150000095367432
1599480230.1559758	5	-4.762499809265137
1599480844.3873897	6	-5.8808512687683105
1599481458.3448627	7	-5.012820720672607
1599482078.6066527	8	-5.946000099182129
1599482693.831322	9	-5.960975646972656
1599483316.636201	10	-5.748780250549316
1599483933.0283034	11	-5.444117546081543
1599484549.9606717	12	-5.735000133514404
1599485165.8163018	13	-6.419444561004639
1599485782.4195914	14	-3.829411745071411
1599486399.9395256	15	-4.581080913543701
1599487018.5466244	16	-3.4814815521240234
1599487636.2484095	17	-3.0333333015441895
1599488255.72686	18	-4.107692241668701
1599488866.5567408	19	-4.773684024810791
1599489478.234699	20	-3.4911763668060303
1599490094.8960671	21	-3.5416667461395264
1599490710.5021312	22	-2.98799991607666
1599491329.7000203	23	-5.00697660446167
1599491931.569934	24	-5.489473819732666
1599492528.6827252	25	-5.832432270050049
1599493124.2802777	26	-3.9194445610046387
1599493729.9819443	27	-3.1818182468414307
1599494333.2507293	28	-6.394444465637207
1599494928.7625513	29	-4.647368431091309
1599495517.6873877	30	-3.8888888359069824
1599496115.33702	31	-4.576315879821777
1599496710.9409554	32	-1.7367347478866577
1599497297.0849118	33	-4.884615421295166
1599497892.5543244	34	-0.9205882549285889
1599498500.0254028	35	-4.876923084259033
1599499098.5518138	36	-2.1655173301696777
1599499696.5653322	37	-8.725000381469727
1599500298.2129204	38	-3.3487179279327393
1599500889.1059747	39	-6.888235092163086
1599501484.6337314	40	-4.669696807861328
1599502072.3677423	41	-2.3065216541290283
1599502669.0420744	42	-5.490624904632568
1599503270.9480348	43	-2.2791666984558105
1599503859.555384	44	-1.53125
1599504446.6432378	45	-3.2179486751556396
1599505023.1934083	46	-3.6615383625030518
1599505607.4830484	47	-2.1909091472625732
1599506197.1230462	48	-1.0228571891784668
1599506782.2872064	49	-2.7756097316741943
1599507369.5875528	50	-3.117021322250366
1599507952.5210195	51	-0.552173912525177
1599508535.4453645	52	-4.855555534362793
1599509120.9842288	53	-5.050000190734863
1599509698.0299208	54	-4.1270270347595215
1599510285.5751576	55	-3.8924999237060547
1599510867.870818	56	-8.352380752563477
1599511458.7133114	57	-4.83863639831543
1599512045.19713	58	-3.364102602005005
1599512636.8789706	59	-2.5829267501831055
1599513229.8144882	60	-3.2906975746154785
1599513823.1343617	61	-2.791304349899292
1599514410.6026032	62	-4.320000171661377
1599515001.5484152	63	-1.6583333015441895
1599515594.4483097	64	-3.619999885559082
1599516183.7306461	65	-3.5470588207244873
1599516770.0713873	66	-2.8672726154327393
1599517353.435985	67	0.3777777850627899
1599517953.9256055	68	-3.4394736289978027
1599518535.5555325	69	-3.299999952316284
1599519120.3823545	70	-3.3459458351135254
1599519704.302851	71	-4.083333492279053
1599520300.5872343	72	-4.505882263183594
1599520893.7515874	73	-1.206451654434204
1599521474.9184515	74	-4.321052551269531
1599522058.377593	75	-2.9906249046325684
1599522654.59184	76	-2.57608699798584
1599523232.4080951	77	-3.2948718070983887
1599523813.2161808	78	-1.6459459066390991
1599524384.2814174	79	-4.05555534362793
1599524979.6937408	80	-2.7952380180358887
1599525565.9502597	81	-3.261538505554199
1599526161.860517	82	-2.77647066116333
1599526753.0388443	83	-1.5885714292526245
1599527328.806985	84	-3.1534883975982666
1599527910.197756	85	-3.211627960205078
1599528487.4048767	86	-3.3524999618530273
1599529066.3381667	87	-1.8674999475479126
1599529648.2222862	88	-3.0512821674346924
1599530237.7539203	89	-3.4352941513061523
1599530818.5319672	90	-2.6813952922821045
1599531395.743895	91	0.7200000286102295
1599531971.6092315	92	-2.722222328186035
1599532555.063064	93	-6.52142858505249
1599533153.214151	94	-2.848936080932617
1599533737.385831	95	-1.006666660308838
1599534312.5518196	96	-0.9153845906257629
1599534890.3999443	97	-1.4901961088180542
1599535460.5653841	98	-2.144897937774658
1599535954.9887834	99	-2.1729166507720947
1599536284.6475003	100	-3.7705881595611572
