# Supplementary material
Source: ML conference proceedings conference paper supplement (https://proceedings.mlr.press/v139/rahman21a.html)
Supplement: Supplementary file 3 [file rahman21a-supp.zip › ICMLSupportingDoc 2/Visualization/OpenFortAttackRes/TRAIN/LSTM/run-zkxtsvlqgb-tag-Rewards_train_set.csv]

Wall time	Step	Value
1599477144.5182922	0	-5.026315689086914
1599477758.2594821	1	-6.564705848693848
1599478368.55201	2	-4.8578948974609375
1599478984.7956047	3	-7.885714054107666
1599479596.4545162	4	-7.755882263183594
1599480208.5971475	5	-3.1114284992218018
1599480816.864392	6	-7.114285945892334
1599481423.9274015	7	-8.75882339477539
1599482040.0532985	8	-7.228947162628174
1599482649.5330567	9	-4.244185924530029
1599483263.5622177	10	-4.702127456665039
1599483868.08916	11	-3.4749999046325684
1599484478.2008264	12	-2.71875
1599485089.3122833	13	-4.037499904632568
1599485701.0070162	14	-4.602173805236816
1599486315.9001148	15	-5.990322589874268
1599486929.4891639	16	-4.393750190734863
1599487534.9404793	17	-2.1891891956329346
1599488138.6692271	18	-3.671428680419922
1599488742.5901802	19	-5.2071428298950195
1599489353.5334368	20	-2.865217447280884
1599489958.1516361	21	-6.150000095367432
1599490567.991463	22	-2.7133333683013916
1599491171.1959386	23	-5.922727108001709
1599491766.3068323	24	-5.3947367668151855
1599492353.8670316	25	-5.295000076293945
1599492949.8823614	26	-4.848979473114014
1599493540.7579722	27	-2.9448275566101074
1599494130.3391855	28	-4.842857360839844
1599494711.9954462	29	-5.065384387969971
1599495294.1655095	30	-5.00697660446167
1599495878.5282555	31	-3.0387754440307617
1599496467.1129987	32	-3.819512128829956
1599497047.915713	33	-1.695918321609497
1599497637.5428073	34	-4.658823490142822
1599498230.5988114	35	-7.914285659790039
1599498815.8335838	36	-3.079310417175293
1599499413.086061	37	-3.3529412746429443
1599500004.2658727	38	-4.505263328552246
1599500594.344984	39	-4.09743595123291
1599501185.1935408	40	-4.0651164054870605
1599501762.8194425	41	-5.032432556152344
1599502349.2829657	42	-3.7731707096099854
1599502932.390165	43	-2.7200000286102295
1599503524.3798215	44	-1.9153846502304077
1599504103.8596535	45	-3.0789473056793213
1599504682.6114206	46	-4.113157749176025
1599505264.7596977	47	-3.492682933807373
1599505851.998154	48	1.0081632137298584
1599506431.7939496	49	-2.5145833492279053
1599507021.232393	50	-3.3977272510528564
1599507607.9196553	51	-0.9959183931350708
1599508193.6563976	52	-2.668750047683716
1599508785.0628326	53	-1.1214286088943481
1599509375.2788355	54	-2.904651165008545
1599509981.6944933	55	-2.860377311706543
1599510568.9574718	56	-3.293750047683716
1599511157.950755	57	-1.9639999866485596
1599511750.0104518	58	-3.2833333015441895
1599512337.189367	59	-2.2950000762939453
1599512929.2300537	60	-1.7775510549545288
1599513509.9808922	61	-3.0514285564422607
1599514090.8849368	62	-4.087804794311523
1599514671.0672932	63	-3.069767475128174
1599515256.7714703	64	-4.832258224487305
1599515842.5197904	65	-1.8756756782531738
1599516428.5274277	66	-3.430769205093384
1599517007.0989382	67	-2.4000000953674316
1599517586.2515132	68	-2.133333444595337
1599518160.5479887	69	-3.7093749046325684
1599518750.0090344	70	-3.3289473056793213
1599519336.3201337	71	-2.346341371536255
1599519927.0783556	72	-1.3380000591278076
1599520529.6875892	73	-0.637837827205658
1599521117.4504743	74	-2.9294116497039795
1599521699.0474794	75	-4.43055534362793
1599522295.02643	76	-3.549999952316284
1599522879.6345491	77	-3.67380952835083
1599523459.1911092	78	-2.5924999713897705
1599524041.50542	79	-5.411764621734619
1599524629.4898822	80	-2.5842106342315674
1599525203.4981852	81	-3.007317066192627
1599525800.6415691	82	-2.2807693481445312
1599526382.378138	83	-5.529268264770508
1599526964.4173238	84	-2.2432432174682617
1599527547.4425526	85	-3.25
1599528128.6388185	86	-3.0581395626068115
1599528712.3556323	87	-2.231428623199463
1599529294.963345	88	-3.702173948287964
1599529873.7589343	89	-5.539999961853027
1599530449.3215094	90	-2.952380895614624
1599531027.2888381	91	-3.121875047683716
1599531605.6247394	92	-0.3787234127521515
1599532179.4438915	93	-1.5750000476837158
1599532764.234573	94	-2.299999952316284
1599533336.80883	95	-1.7108107805252075
1599533908.5438817	96	-4.577499866485596
1599534485.2854145	97	-1.3037736415863037
1599535068.2935588	98	-4.9076924324035645
1599535616.3301878	99	-4.009302139282227
1599536081.8272378	100	-3.915384531021118
