# Supplementary material
Source: ML conference proceedings conference paper supplement (https://proceedings.mlr.press/v139/rahman21a.html)
Supplement: Supplementary file 3 [file rahman21a-supp.zip › ICMLSupportingDoc 2/Visualization/OpenFortAttackRes/TRAIN/LSTM_test/run-adwclsctqk-tag-Rewards_eval.csv]

Wall time	Step	Value
1599477162.7715652	0	-6.485714435577393
1599477775.7134378	1	-4.260606288909912
1599478397.7450879	2	-4.151219367980957
1599479012.4561045	3	-8.014286041259766
1599479622.5288181	4	-4.857500076293945
1599480236.9052467	5	-7.011428356170654
1599480859.9748948	6	-5.166666507720947
1599481485.2991257	7	-6.139999866485596
1599482106.7439382	8	-5.644444465637207
1599482730.53472	9	-2.578378438949585
1599483355.925213	10	-6.4425530433654785
1599483977.17146	11	-5.251063823699951
1599484594.0283906	12	-5.47428560256958
1599485212.4772923	13	-3.6069767475128174
1599485823.9847715	14	-6.7022223472595215
1599486434.8321	15	-4.5947370529174805
1599487039.4011588	16	-4.793181896209717
1599487637.0803907	17	-3.9744186401367188
1599488251.396598	18	-4.619999885559082
1599488852.1172395	19	-4.809523582458496
1599489448.411045	20	-2.7060606479644775
1599490048.6852257	21	-4.963265419006348
1599490646.7983217	22	-3.134999990463257
1599491244.93179	23	-2.7604167461395264
1599491842.2834334	24	-3.4103448390960693
1599492435.1601853	25	-2.1080000400543213
1599493027.891572	26	-5.841860294342041
1599493632.4321518	27	-4.829166889190674
1599494234.27475	28	-4.948148250579834
1599494828.8019457	29	-4.5707316398620605
1599495416.927687	30	-2.855882406234741
1599496027.0430207	31	-4.699999809265137
1599496623.21747	32	-5.860416889190674
1599497210.5219574	33	-5.039999961853027
1599497813.107665	34	-4.980555534362793
1599498421.14385	35	-5.144444465637207
1599499022.647021	36	-2.774418592453003
1599499619.4446685	37	-3.6157894134521484
1599500214.7865658	38	-6.014285564422607
1599500796.1097014	39	-4.034999847412109
1599501387.5997765	40	-2.6472222805023193
1599501984.5353203	41	-4.456756591796875
1599502578.57683	42	-4.38918924331665
1599503169.729183	43	-5.184848308563232
1599503752.1921802	44	-3.853191375732422
1599504332.05432	45	-7.204999923706055
1599504915.3374646	46	-4.115151405334473
1599505498.0159237	47	-3.887179374694824
1599506093.7370813	48	-5.626530647277832
1599506683.4702623	49	-6.188636302947998
1599507266.0879064	50	-5.353488445281982
1599507846.854658	51	-4.337037086486816
1599508434.0576692	52	-4.335000038146973
1599509014.7448602	53	-5.5933332443237305
1599509597.921358	54	-4.365853786468506
1599510192.4322855	55	-4.209523677825928
1599510771.4659052	56	-2.4225807189941406
1599511354.0377882	57	-2.7387096881866455
1599511933.9581683	58	-3.624324321746826
1599512524.3623326	59	-4.524324417114258
1599513104.0288825	60	-2.629166603088379
1599513685.9551585	61	-6.11621618270874
1599514265.7896798	62	-4.997222423553467
1599514849.2762883	63	-4.060975551605225
1599515444.9020734	64	-3.954545497894287
1599516016.7281199	65	-3.686206817626953
1599516586.3017242	66	-4.86904764175415
1599517179.202849	67	-3.936363697052002
1599517767.6889534	68	-5.741860389709473
1599518338.1988444	69	-4.027500152587891
1599518927.8560092	70	-3.9179487228393555
1599519532.6420321	71	-4.817948818206787
1599520118.3364944	72	-7.173684120178223
1599520690.82293	73	-2.987499952316284
1599521268.491071	74	-4.655555725097656
1599521857.7384577	75	-2.799999952316284
1599522440.7471945	76	-3.1024999618530273
1599523023.0464637	77	-5.609375
1599523608.4124112	78	-4.829787254333496
1599524193.2974548	79	-3.869999885559082
1599524779.3724732	80	-1.9233332872390747
1599525365.564881	81	-4.230612277984619
1599525952.2974496	82	-3.326829195022583
1599526533.0252929	83	-3.2804877758026123
1599527111.659504	84	-2.7977778911590576
1599527692.651443	85	-4.425641059875488
1599528269.4488804	86	-3.3527777194976807
1599528852.1761637	87	-4.656097412109375
1599529441.7101848	88	-4.354545593261719
1599530037.5151052	89	-2.6948719024658203
1599530621.5068717	90	-3.731428623199463
1599531199.2437348	91	-3.6066665649414062
1599531784.6788316	92	-2.409090995788574
1599532371.6561952	93	-5.141176700592041
1599532972.4643161	94	-3.231579065322876
1599533551.1273193	95	-5.1533331871032715
1599534139.9190629	96	-3.9774999618530273
1599534736.203033	97	-3.4268293380737305
1599535311.2696624	98	-4.3578948974609375
1599535774.0211933	99	-3.6119048595428467
1599536128.255555	100	-3.4136364459991455
