# Supplementary material
Source: ML conference proceedings conference paper supplement (https://proceedings.mlr.press/v139/rahman21a.html)
Supplement: Supplementary file 3 [file rahman21a-supp.zip › ICMLSupportingDoc 2/Visualization/OpenFortAttackRes/TRAIN/LSTM_test/run-aiviwcbbvl-tag-Rewards_eval.csv]

Wall time	Step	Value
1599477149.5931504	0	-5.546875
1599477759.6517003	1	-2.47352933883667
1599478375.8061085	2	-7.137499809265137
1599478985.9533982	3	-3.905128240585327
1599479587.6843536	4	-7.891666889190674
1599480194.5358572	5	-8.224390029907227
1599480805.0556293	6	-7.25454568862915
1599481424.9307787	7	-3.981250047683716
1599482040.8011584	8	-4.675000190734863
1599482644.0811305	9	-7.52400016784668
1599483252.6829355	10	-4.599999904632568
1599483862.7271912	11	-5.04878044128418
1599484461.8652189	12	-3.067857027053833
1599485071.9308906	13	-2.3062500953674316
1599485688.6822255	14	-4.357142925262451
1599486298.6189766	15	-6.026829242706299
1599486899.0857573	16	-3.4000000953674316
1599487508.216558	17	-4.962500095367432
1599488107.7880065	18	-5.61621618270874
1599488716.7966037	19	-4.6078948974609375
1599489316.0801191	20	-5.788636207580566
1599489928.5438795	21	-6.246666431427002
1599490542.322976	22	-2.9885714054107666
1599491150.4050705	23	-4.135000228881836
1599491740.085556	24	-5.051612854003906
1599492323.5011368	25	-4.9029412269592285
1599492910.8604567	26	-4.971930027008057
1599493502.881732	27	-4.0615386962890625
1599494100.6306407	28	-5.667500019073486
1599494691.2403543	29	-3.4041666984558105
1599495278.1613994	30	-4.949999809265137
1599495862.4267845	31	-2.0
1599496448.7827387	32	-4.7756757736206055
1599497034.117119	33	-4.297435760498047
1599497629.2212398	34	-4.637499809265137
1599498229.4075675	35	-3.8785715103149414
1599498823.6955469	36	-6.028571605682373
1599499420.7928576	37	-4.961111068725586
1599500015.7749498	38	-2.752500057220459
1599500605.0141737	39	-3.891489267349243
1599501193.6407385	40	-3.5703704357147217
1599501780.3156068	41	-2.856097459793091
1599502368.4966972	42	-2.737499952316284
1599502959.7375472	43	-2.022580623626709
1599503550.5512266	44	-4.989999771118164
1599504142.9231713	45	-3.5924999713897705
1599504729.6592145	46	-4.453845977783203
1599505315.494576	47	-5.538461685180664
1599505901.7905974	48	-6.415384769439697
1599506483.8498592	49	-2.659459352493286
1599507065.6396348	50	-2.15116286277771
1599507643.4704459	51	-3.692857027053833
1599508225.5621092	52	-1.6081081628799438
1599508798.7980163	53	-3.0326087474823
1599509371.1106844	54	-4.562857151031494
1599509955.1560571	55	-2.6052632331848145
1599510530.1019824	56	-3.6279070377349854
1599511113.5597403	57	-3.585416555404663
1599511696.9124465	58	-1.2131578922271729
1599512286.9011686	59	-1.7416666746139526
1599512863.3383954	60	-3.9529411792755127
1599513447.1651645	61	-2.2592592239379883
1599514026.5252175	62	-3.3942856788635254
1599514606.0908377	63	-3.4709091186523438
1599515189.965461	64	-3.788372039794922
1599515778.668371	65	-6.6479997634887695
1599516376.6592345	66	-4.471111297607422
1599516952.597226	67	-5.349999904632568
1599517538.1975985	68	-2.6466667652130127
1599518131.2922888	69	-4.027500152587891
1599518708.2291348	70	-4.152500152587891
1599519286.1919372	71	-4.140625
1599519875.2872155	72	-2.5545454025268555
1599520467.6614962	73	-3.4452829360961914
1599521057.2940822	74	-4.851219654083252
1599521637.7471929	75	-6.717857360839844
1599522237.7531893	76	-2.7756757736206055
1599522838.0767143	77	-4.113636493682861
1599523431.180923	78	-3.7074074745178223
1599524015.548796	79	-4.518750190734863
1599524607.6546853	80	-2.517073154449463
1599525203.7395434	81	-7.5714287757873535
1599525793.9769456	82	-3.4766666889190674
1599526393.11626	83	-4.391666889190674
1599526976.0641127	84	-2.424999952316284
1599527568.6138272	85	-2.922727346420288
1599528152.6333477	86	-4.296428680419922
1599528726.7777588	87	-7.695000171661377
1599529313.1072092	88	-5.400000095367432
1599529899.1037264	89	-6.575861930847168
1599530484.5734773	90	-4.090476036071777
1599531060.7121735	91	-3.5999999046325684
1599531641.1616147	92	-3.444185972213745
1599532214.2707744	93	-2.463829755783081
1599532800.9880795	94	-4.3027777671813965
1599533395.8222854	95	-2.573913097381592
1599533966.5871177	96	-2.9000000953674316
1599534548.9752617	97	-4.037837982177734
1599535128.9064822	98	-5.389285564422607
1599535670.0967157	99	-7.915789604187012
1599536119.410433	100	-4.812121391296387
