# Supplementary material
Source: ML conference proceedings conference paper supplement (https://proceedings.mlr.press/v139/rahman21a.html)
Supplement: Supplementary file 3 [file rahman21a-supp.zip › ICMLSupportingDoc 2/Visualization/OpenFortAttackRes/TRAIN/LSTM_test/run-ewywycsjuj-tag-Rewards_eval.csv]

Wall time	Step	Value
1599477149.9922643	0	-6.199999809265137
1599477757.442034	1	-5.011363506317139
1599478365.6289916	2	-5.716000080108643
1599478976.7363105	3	-5.733333110809326
1599479566.6675053	4	-6.859259128570557
1599480162.707785	5	-4.752380847930908
1599480764.000878	6	-2.1268293857574463
1599481359.054802	7	-8.640740394592285
1599481954.644873	8	-5.129268169403076
1599482549.4173503	9	-4.0970587730407715
1599483135.6291904	10	-6.204877853393555
1599483722.7020743	11	-3.480851173400879
1599484306.9543834	12	-5.65625
1599484889.7240105	13	-4.821621417999268
1599485480.437355	14	-4.090909004211426
1599486062.3197603	15	-6.15675687789917
1599486649.3397768	16	-2.739534854888916
1599487232.4783082	17	-5.223076820373535
1599487810.461354	18	-3.879310369491577
1599488391.638554	19	-4.460606098175049
1599488962.3383439	20	-4.162068843841553
1599489538.6092432	21	-2.6464285850524902
1599490107.3644476	22	-3.5054054260253906
1599490677.1635957	23	-2.0933332443237305
1599491240.2010229	24	-4.748936176300049
1599491814.3997624	25	-4.9285712242126465
1599492392.7996793	26	-3.192500114440918
1599492977.7818904	27	-2.964583396911621
1599493562.1750028	28	-2.2333333492279053
1599494145.6569846	29	-4.056000232696533
1599494727.9655437	30	-4.10277795791626
1599495320.228706	31	-5.764864921569824
1599495911.659457	32	-6.609523773193359
1599496497.3973098	33	-3.2767441272735596
1599497084.059502	34	-8.015000343322754
1599497674.254325	35	-3.5945944786071777
1599498245.3423383	36	-8.116666793823242
1599498821.9546542	37	-7.009090900421143
1599499407.857109	38	-4.3378376960754395
1599499992.1655786	39	-3.5261905193328857
1599500566.8371456	40	-2.28125
1599501143.1089058	41	-4.622222423553467
1599501720.489561	42	-3.700000047683716
1599502308.3640213	43	-4.489361763000488
1599502882.2314725	44	-4.197872161865234
1599503454.3093967	45	-3.3456521034240723
1599504023.7918603	46	-3.5862746238708496
1599504593.4013724	47	-4.908571243286133
1599505181.7574928	48	-2.826829195022583
1599505749.4109251	49	-3.875609874725342
1599506328.186151	50	-3.752500057220459
1599506910.0366797	51	-4.564285755157471
1599507501.419486	52	-3.875
1599508074.5334272	53	-4.256666660308838
1599508665.3014233	54	-2.3032257556915283
1599509258.2300715	55	-2.9161291122436523
1599509845.7624557	56	-5.08695650100708
1599510427.3765833	57	-5.180952548980713
1599511013.2074163	58	-1.6641509532928467
1599511606.5666711	59	-1.9263157844543457
1599512184.1770804	60	-3.08717942237854
1599512776.8543494	61	-3.9100000858306885
1599513356.1504524	62	-4.162962913513184
1599513939.980874	63	-2.520512819290161
1599514529.337936	64	-2.908695697784424
1599515106.6979392	65	-5.03157901763916
1599515682.3942423	66	-2.824324369430542
1599516270.4914067	67	-3.736363649368286
1599516858.0854757	68	-3.8309524059295654
1599517429.0426888	69	-3.8684210777282715
1599518006.496073	70	-3.8255813121795654
1599518596.0778646	71	-1.3512195348739624
1599519182.7380712	72	-2.653125047683716
1599519751.55517	73	-4.506896495819092
1599520300.1995459	74	-6.404347896575928
1599520857.5058625	75	-2.252941131591797
1599521429.4478018	76	-3.26285719871521
1599521985.9541466	77	-1.36896550655365
1599522552.3593876	78	-3.7139534950256348
1599523116.7193205	79	-2.8138887882232666
1599523696.6628103	80	-2.2811319828033447
1599524267.9681287	81	-4.444117546081543
1599524845.0959718	82	-2.6627907752990723
1599525422.0747292	83	-1.8156249523162842
1599525982.9664867	84	-4.429411888122559
1599526553.5752041	85	-1.691428542137146
1599527121.8259501	86	-1.6216216087341309
1599527691.357015	87	-1.763157844543457
1599528267.4310436	88	-4.4472222328186035
1599528843.307051	89	-1.2384614944458008
1599529423.6700718	90	-3.432692289352417
1599529998.1279755	91	-5.826829433441162
1599530577.9786658	92	-4.389473915100098
1599531166.2007952	93	-2.3216216564178467
1599531751.0878143	94	-3.7437500953674316
1599532339.0876708	95	-2.4469387531280518
1599532907.4709215	96	-5.0756096839904785
1599533496.7365305	97	-2.735555648803711
1599534080.3906937	98	-1.7048780918121338
1599534683.069558	99	-3.528301954269409
1599535276.666023	100	-2.3119046688079834
