# Supplementary material
Source: ML conference proceedings conference paper supplement (https://proceedings.mlr.press/v139/rahman21a.html)
Supplement: Supplementary file 3 [file rahman21a-supp.zip › ICMLSupportingDoc 2/Visualization/OpenFortAttackRes/TRAIN/LSTM_test/run-gqtstkdnvc-tag-Rewards_eval.csv]

Wall time	Step	Value
1599477159.518097	0	-4.077777862548828
1599477763.7221437	1	-4.574999809265137
1599478364.259657	2	-3.612499952316284
1599478963.8170087	3	-4.427659511566162
1599479551.436298	4	-7.921276569366455
1599480147.1164622	5	-5.741379261016846
1599480748.2185493	6	-6.006666660308838
1599481346.454762	7	-3.67878794670105
1599481951.241743	8	-5.585714340209961
1599482547.4254935	9	-4.840000152587891
1599483140.0702832	10	-6.413513660430908
1599483732.9636047	11	-5.221052646636963
1599484325.097863	12	-6.328260898590088
1599484923.3711867	13	-5.942424297332764
1599485527.9998271	14	-5.013953685760498
1599486118.047619	15	-3.383871078491211
1599486699.5463908	16	-4.668421268463135
1599487286.1819797	17	-2.694444417953491
1599487876.1190734	18	-2.6057143211364746
1599488457.3367765	19	-7.7076921463012695
1599489045.895347	20	-4.817391395568848
1599489645.5724692	21	-4.4209303855896
1599490227.6680624	22	-3.125641107559204
1599490818.6871269	23	-5.164000034332275
1599491406.7373447	24	-4.378723621368408
1599492004.7729552	25	-2.866666555404663
1599492607.5954196	26	-5.321875095367432
1599493207.2203255	27	-4.005000114440918
1599493803.6537075	28	-3.1341464519500732
1599494402.4939513	29	-5.239999771118164
1599494999.438629	30	-5.643333435058594
1599495609.9931347	31	-4.410638332366943
1599496217.0297203	32	-5.508108139038086
1599496817.655013	33	-4.752500057220459
1599497421.8864794	34	-2.75
1599498027.0177896	35	-4.849999904632568
1599498622.3097787	36	-3.1971428394317627
1599499216.991292	37	-4.793333530426025
1599499815.84029	38	-3.6424999237060547
1599500394.7063506	39	-4.608889102935791
1599500984.272824	40	-4.284090995788574
1599501579.1681416	41	-2.5
1599502165.459255	42	-6.839130401611328
1599502748.5635169	43	-3.2827587127685547
1599503323.7991638	44	-2.448648691177368
1599503909.565436	45	-4.257500171661377
1599504495.2064345	46	-0.47297295928001404
1599505078.7732565	47	-3.319444417953491
1599505675.9676213	48	-1.72826087474823
1599506262.4100559	49	-3.641176462173462
1599506849.398868	50	-2.5
1599507438.9676578	51	-4.6702704429626465
1599508029.2581031	52	-3.765306234359741
1599508613.459021	53	-1.9931035041809082
1599509202.087906	54	-3.9324324131011963
1599509793.2033513	55	-5.484000205993652
1599510378.5967731	56	-5.0608696937561035
1599510967.3367734	57	-2.9000000953674316
1599511559.2151937	58	-5.523333549499512
1599512146.4979775	59	-4.043243408203125
1599512734.7184546	60	-3.406521797180176
1599513324.6651711	61	-4.048387050628662
1599513915.3266287	62	-4.305714130401611
1599514515.3538284	63	-3.0153846740722656
1599515102.9738238	64	-3.2452380657196045
1599515685.5259368	65	-4.244444370269775
1599516252.2795687	66	-3.6571428775787354
1599516839.599487	67	-3.067272663116455
1599517423.7364883	68	-4.264102458953857
1599517983.5380483	69	-4.659999847412109
1599518566.9341602	70	-3.01025652885437
1599519159.6660194	71	-4.988372325897217
1599519752.9752858	72	-3.1115384101867676
1599520327.272729	73	-5.257143020629883
1599520894.9645698	74	-4.34250020980835
1599521469.201428	75	-2.8307693004608154
1599522046.4483855	76	-4.319047451019287
1599522620.6759439	77	-1.4674999713897705
1599523207.095816	78	-4.912195205688477
1599523789.9164882	79	-3.013636350631714
1599524376.982273	80	-5.0527777671813965
1599524950.881131	81	-5.722580432891846
1599525539.1105263	82	-2.6097559928894043
1599526108.9565434	83	-3.0068182945251465
1599526683.106105	84	-4.42058801651001
1599527271.6266212	85	-4.992000102996826
1599527862.7615592	86	-2.3127660751342773
1599528439.5189018	87	-3.9666666984558105
1599529031.621369	88	-4.938889026641846
1599529618.4958692	89	-4.756410121917725
1599530207.960929	90	-5.661764621734619
1599530793.207999	91	-2.9744186401367188
1599531384.5712333	92	-4.123076915740967
1599531977.216197	93	-2.983673572540283
1599532580.9080825	94	-6.332499980926514
1599533171.0676484	95	-2.1861112117767334
1599533758.0061145	96	-4.885714054107666
1599534347.6021934	97	-7.222727298736572
1599534931.90212	98	-2.9749999046325684
1599535489.5110555	99	-3.1325581073760986
1599535931.1256244	100	-4.090697765350342
