# Supplementary material
Source: ML conference proceedings conference paper supplement (https://proceedings.mlr.press/v139/rahman21a.html)
Supplement: Supplementary file 3 [file rahman21a-supp.zip › ICMLSupportingDoc 2/Visualization/OpenFortAttackRes/TRAIN/LSTM_test/run-hbulgxtzpv-tag-Rewards_eval.csv]

Wall time	Step	Value
1599477155.8931696	0	-7.1875
1599477767.339047	1	-7.017021179199219
1599478376.4724054	2	-5.528260707855225
1599478975.0804641	3	-7.907317161560059
1599479577.0593493	4	-7.203030109405518
1599480179.1690226	5	-6.961538314819336
1599480782.2993326	6	-3.2882351875305176
1599481391.917388	7	-6.1976189613342285
1599482003.4393563	8	-7.224242210388184
1599482611.4296649	9	-2.7620689868927
1599483218.50683	10	-5.5428571701049805
1599483824.0825803	11	-6.257143020629883
1599484434.5846019	12	-4.186363697052002
1599485036.8810813	13	-8.128571510314941
1599485652.1291385	14	-5.050000190734863
1599486265.1951995	15	-6.74545431137085
1599486864.307138	16	-3.6102564334869385
1599487472.186744	17	-2.7274999618530273
1599488085.4817696	18	-5.737500190734863
1599488688.8188753	19	-3.6052632331848145
1599489294.872352	20	-4.5333333015441895
1599489904.5366926	21	-2.654761791229248
1599490511.442021	22	-4.454838752746582
1599491124.5523179	23	-4.165306091308594
1599491718.098324	24	-4.265909194946289
1599492299.810016	25	-1.7966666221618652
1599492890.3842795	26	-1.3647059202194214
1599493483.552129	27	-3.5921051502227783
1599494072.8130019	28	-1.4764705896377563
1599494657.9325416	29	-4.625
1599495239.3286834	30	-3.9156250953674316
1599495822.0406039	31	-5.023809432983398
1599496395.9287891	32	-3.366666555404663
1599496977.4849706	33	-4.699999809265137
1599497561.8410337	34	-5.197500228881836
1599498151.585633	35	-5.164515972137451
1599498733.53999	36	-4.21842098236084
1599499308.7089198	37	-2.480487823486328
1599499889.171565	38	-2.6909091472625732
1599500475.6054485	39	-3.7193548679351807
1599501064.499189	40	-4.050000190734863
1599501653.958048	41	-6.108333110809326
1599502242.2188523	42	-3.4000000953674316
1599502838.4957385	43	-4.160975456237793
1599503431.0554302	44	-4.442857265472412
1599504019.382876	45	-8.142105102539062
1599504609.817231	46	-2.4589743614196777
1599505196.4503577	47	-2.9779999256134033
1599505791.3620198	48	-3.887500047683716
1599506374.6363204	49	-3.5651161670684814
1599506955.497261	50	-5.626190662384033
1599507541.3300862	51	-4.1408162117004395
1599508126.2065878	52	-3.3114285469055176
1599508709.349028	53	-4.007692337036133
1599509292.231501	54	-2.7825000286102295
1599509878.3758006	55	-4.515384674072266
1599510457.8450365	56	-3.002173900604248
1599511037.8358605	57	-2.863333225250244
1599511624.3974612	58	-1.8315789699554443
1599512207.4488292	59	-5.5333333015441895
1599512793.0240936	60	-3.2441177368164062
1599513388.4398577	61	-3.3902440071105957
1599513967.087913	62	-4.792500019073486
1599514547.9031823	63	-5.545000076293945
1599515141.902922	64	-2.9734694957733154
1599515732.2212467	65	-3.8222222328186035
1599516325.4236403	66	-3.9425926208496094
1599516907.417527	67	-2.9166667461395264
1599517499.65019	68	-4.581578731536865
1599518078.7058244	69	-5.214705944061279
1599518659.1050117	70	-2.9518518447875977
1599519234.4219575	71	-3.942857027053833
1599519816.5842252	72	-5.808108329772949
1599520409.219699	73	-4.27142858505249
1599521002.6833298	74	-3.910810708999634
1599521583.6768498	75	-4.515384674072266
1599522171.671059	76	-3.731579065322876
1599522764.6264496	77	-3.9232559204101562
1599523358.9789774	78	-4.940384387969971
1599523931.973669	79	-5.003125190734863
1599524516.175393	80	-3.068085193634033
1599525102.588445	81	-5.1777777671813965
1599525686.1229558	82	-4.386000156402588
1599526281.811209	83	-4.0577778816223145
1599526860.879089	84	-2.623333215713501
1599527434.6252215	85	-7.638888835906982
1599528006.9710968	86	-4.512499809265137
1599528578.3397036	87	-3.645238161087036
1599529150.8803313	88	-3.621621608734131
1599529722.888305	89	-3.299999952316284
1599530294.495453	90	-3.8607141971588135
1599530861.7559652	91	-4.465714454650879
1599531422.8617115	92	-2.4200000762939453
1599531996.7434816	93	-3.013333320617676
1599532573.7965453	94	-4.787755012512207
1599533148.1908774	95	-2.553333282470703
1599533719.2734802	96	-2.57619047164917
1599534287.1175272	97	-2.8607842922210693
1599534851.0840962	98	-6.630000114440918
1599535416.7837424	99	-3.1446807384490967
1599535917.7660716	100	-4.584615230560303
