# Supplementary material
Source: ML conference proceedings conference paper supplement (https://proceedings.mlr.press/v139/rahman21a.html)
Supplement: Supplementary file 3 [file rahman21a-supp.zip › ICMLSupportingDoc 2/Visualization/OpenFortAttackRes/TRAIN/LSTM_test/run-jkgwdlszub-tag-Rewards_eval.csv]

Wall time	Step	Value
1599477150.3120203	0	-7.9259257316589355
1599477747.7481222	1	-5.9488372802734375
1599478344.4667373	2	-5.269697189331055
1599478942.494676	3	-6.124390125274658
1599479535.213221	4	-4.997777938842773
1599480126.514818	5	-8.66551685333252
1599480728.6461935	6	-6.162499904632568
1599481313.4218066	7	-7.574999809265137
1599481910.6376925	8	-4.284615516662598
1599482493.498185	9	-3.7219512462615967
1599483079.0255303	10	-4.854838848114014
1599483667.9717546	11	-4.461904525756836
1599484253.035544	12	-3.534482717514038
1599484838.8989372	13	-5.6710524559021
1599485422.6274438	14	-7.487500190734863
1599486006.7422676	15	-2.984999895095825
1599486581.3149736	16	-5.125714302062988
1599487152.7223895	17	-7.595652103424072
1599487732.0904057	18	-3.6694445610046387
1599488304.880219	19	-7.595454692840576
1599488882.3045435	20	-6.809999942779541
1599489464.7768037	21	-1.6648648977279663
1599490040.7161357	22	-3.597959280014038
1599490621.4149454	23	-2.2119998931884766
1599491199.9685912	24	-4.141463279724121
1599491783.4545968	25	-1.7314814329147339
1599492376.0565073	26	-3.3971428871154785
1599492970.8375576	27	-3.359459400177002
1599493564.714367	28	-2.7139999866485596
1599494154.1968713	29	-6.562162399291992
1599494752.6061132	30	-2.6026315689086914
1599495359.7887714	31	-1.924390196800232
1599495959.4303145	32	-5.179591655731201
1599496546.239459	33	-1.5421053171157837
1599497144.1705902	34	-1.2999999523162842
1599497740.874785	35	-3.0155556201934814
1599498333.108843	36	-3.219148874282837
1599498927.6878142	37	-2.19069766998291
1599499516.375035	38	-2.375609874725342
1599500105.500064	39	-4.2622222900390625
1599500701.9877033	40	-2.59761905670166
1599501294.6677797	41	-4.490697860717773
1599501890.2324011	42	-5.816215991973877
1599502483.442682	43	-3.508695602416992
1599503076.5167656	44	-5.1270270347595215
1599503659.8884306	45	-4.2468085289001465
1599504247.8364723	46	-4.302272796630859
1599504834.639261	47	-2.2609755992889404
1599505424.2200165	48	-2.269230842590332
1599506015.0031433	49	-2.299999952316284
1599506603.7220888	50	-4.80555534362793
1599507187.28216	51	-5.870588302612305
1599507761.8623097	52	-4.587878704071045
1599508340.1369064	53	-2.7531914710998535
1599508917.1320584	54	-2.508108139038086
1599509508.5462205	55	-4.651724338531494
1599510083.9213114	56	-2.378378391265869
1599510667.0079339	57	-4.577499866485596
1599511255.5277274	58	-3.9418182373046875
1599511838.268372	59	-1.1148147583007812
1599512421.1707804	60	-5.547826290130615
1599512989.2140875	61	-4.765909194946289
1599513560.696982	62	-4.602040767669678
1599514147.0501153	63	-4.074418544769287
1599514727.716768	64	-7.650000095367432
1599515291.6147752	65	-4.743750095367432
1599515851.9961307	66	-6.0
1599516420.9929402	67	-5.452499866485596
1599517007.4477656	68	-4.567500114440918
1599517581.9998772	69	-3.072499990463257
1599518157.4024293	70	-2.431999921798706
1599518740.1640456	71	-3.0902438163757324
1599519321.5499685	72	-4.68510627746582
1599519893.0974302	73	-5.241176605224609
1599520460.0351503	74	-5.118750095367432
1599521026.1295526	75	-4.128889083862305
1599521597.9796698	76	-4.825714111328125
1599522163.0320275	77	-4.002777576446533
1599522723.4758232	78	-5.475675582885742
1599523290.9583292	79	-5.213158130645752
1599523873.1927145	80	-4.485294342041016
1599524455.078913	81	-3.874000072479248
1599525037.5926876	82	-3.4463415145874023
1599525614.7507932	83	-3.6319148540496826
1599526179.7014716	84	-4.469696998596191
1599526756.3949323	85	-2.133333444595337
1599527329.8278277	86	-1.0613635778427124
1599527904.0503213	87	-4.481818199157715
1599528490.0976052	88	-2.7718749046325684
1599529076.2856927	89	-3.387500047683716
1599529665.900896	90	-4.507143020629883
1599530243.4466696	91	-3.6024389266967773
1599530831.6437333	92	-1.6480000019073486
1599531420.4367101	93	-3.8102564811706543
1599532023.4255612	94	-2.6369564533233643
1599532599.9103842	95	-4.276744365692139
1599533177.4785397	96	-1.4351351261138916
1599533764.1911345	97	-7.921428680419922
1599534353.4036329	98	-4.076470375061035
1599534937.0081367	99	-5.3393940925598145
1599535496.7968714	100	-5.366666793823242
