# Supplementary material
Source: ML conference proceedings conference paper supplement (https://proceedings.mlr.press/v139/rahman21a.html)
Supplement: Supplementary file 3 [file rahman21a-supp.zip › ICMLSupportingDoc 2/Visualization/OpenFortAttackRes/TRAIN/LSTM_test/run-qqqvkconlw-tag-Rewards_eval.csv]

Wall time	Step	Value
1599477152.4635713	0	-4.454545497894287
1599477770.4156907	1	-8.29230785369873
1599478392.1428027	2	-0.9120000004768372
1599479007.8419147	3	-2.8763158321380615
1599479621.982441	4	-5.776666641235352
1599480238.0447946	5	-3.9409091472625732
1599480850.0599034	6	-7.410714149475098
1599481464.5572047	7	-6.400000095367432
1599482086.8835607	8	-5.515555381774902
1599482700.8579774	9	-4.484615325927734
1599483322.8630307	10	-1.4093749523162842
1599483937.9878232	11	-7.9391303062438965
1599484555.642846	12	-4.321212291717529
1599485172.1725368	13	-4.491891860961914
1599485789.7058234	14	-5.166666507720947
1599486406.7361283	15	-0.6161290407180786
1599487028.9534607	16	-4.5057692527771
1599487641.360728	17	-7.3230767250061035
1599488266.3697333	18	-0.8096153736114502
1599488874.75484	19	-3.9439024925231934
1599489486.0547578	20	-2.140000104904175
1599490101.6077597	21	-3.2941176891326904
1599490718.9749467	22	-4.067347049713135
1599491338.8065963	23	-4.513043403625488
1599491938.400499	24	-6.69444465637207
1599492536.1361666	25	-4.650000095367432
1599493133.8901272	26	-1.4272726774215698
1599493736.3494937	27	-4.519999980926514
1599494340.1390326	28	-2.858823537826538
1599494935.4351804	29	-6.467567443847656
1599495522.1116989	30	-6.599999904632568
1599496123.742822	31	-3.0833332538604736
1599496721.5763786	32	-2.5830187797546387
1599497303.4707623	33	-5.141666889190674
1599497900.834598	34	-6.0756096839904785
1599498508.9269958	35	-3.143181800842285
1599499107.3195326	36	-3.458695650100708
1599499702.0169697	37	-4.948148250579834
1599500307.2862241	38	-2.470454454421997
1599500899.0550947	39	-3.619999885559082
1599501492.8321407	40	-4.42380952835083
1599502080.452478	41	-2.635714292526245
1599502676.989677	42	-2.4049999713897705
1599503276.4614854	43	-4.639285564422607
1599503868.8081758	44	-2.580434799194336
1599504453.8364258	45	-4.377777576446533
1599505031.660223	46	-4.495238304138184
1599505613.8293715	47	-4.178787708282471
1599506203.8597867	48	-4.502941131591797
1599506793.2379506	49	-3.620370388031006
1599507377.3234284	50	-3.96842098236084
1599507959.3735123	51	-1.9270269870758057
1599508545.6711967	52	-2.752000093460083
1599509130.9702559	53	-2.855769157409668
1599509702.7357237	54	-7.261904716491699
1599510294.8530898	55	-4.6693878173828125
1599510876.2775335	56	-3.158536672592163
1599511466.3484707	57	-3.6108107566833496
1599512054.5160332	58	-3.186000108718872
1599512646.3398507	59	-3.8021738529205322
1599513240.5527945	60	-3.9700000286102295
1599513834.2393038	61	-2.8037736415863037
1599514417.85026	62	-6.6976189613342285
1599515008.318517	63	-2.6470587253570557
1599515601.8918788	64	-6.702940940856934
1599516190.5046268	65	-3.7545454502105713
1599516775.6634138	66	-2.767857074737549
1599517361.2825994	67	-4.473684310913086
1599517960.9835243	68	-4.703030109405518
1599518544.716256	69	-3.915217399597168
1599519126.3769197	70	-4.5
1599519709.8964827	71	-2.9269230365753174
1599520311.3633533	72	-2.4944443702697754
1599520899.989328	73	-5.39642858505249
1599521482.650948	74	-4.264999866485596
1599522064.3467681	75	-4.018518447875977
1599522660.3524618	76	-7.429999828338623
1599523241.2954392	77	-3.0239131450653076
1599523818.2237258	78	-7.003225803375244
1599524391.61801	79	-3.9452381134033203
1599524989.3526766	80	-3.4000000953674316
1599525575.3017557	81	-6.077777862548828
1599526170.3900135	82	-4.774467945098877
1599526760.6385953	83	-2.979487180709839
1599527336.540233	84	-3.805263042449951
1599527918.3432562	85	-4.539535045623779
1599528495.4784436	86	-5.362500190734863
1599529073.3933215	87	-4.699999809265137
1599529655.0838084	88	-3.8305554389953613
1599530244.091825	89	-4.556666851043701
1599530826.3994317	90	-3.9200000762939453
1599531401.012743	91	-5.5714287757873535
1599531982.183985	92	-4.197958946228027
1599532562.022468	93	-4.194117546081543
1599533162.0943928	94	-4.166666507720947
1599533745.233354	95	-4.179487228393555
1599534317.2178848	96	-6.72857141494751
1599534899.3143752	97	-6.044681072235107
1599535465.80163	98	-4.553333282470703
1599535961.2741854	99	-3.5767440795898438
1599536288.668031	100	-5.460975646972656
