# Supplementary material
Source: ML conference proceedings conference paper supplement (https://proceedings.mlr.press/v139/rahman21a.html)
Supplement: Supplementary file 3 [file rahman21a-supp.zip › ICMLSupportingDoc 2/Visualization/OpenFortAttackRes/TRAIN/LSTM_test/run-zkxtsvlqgb-tag-Rewards_eval.csv]

Wall time	Step	Value
1599477151.7819955	0	-5.5
1599477765.5538082	1	-5.905555725097656
1599478377.9017608	2	-5.8980393409729
1599478990.9796276	3	-6.10606050491333
1599479602.2473218	4	-7.2133331298828125
1599480215.7159178	5	-4.5853657722473145
1599480823.08833	6	-6.1483869552612305
1599481430.140514	7	-6.159999847412109
1599482046.8984857	8	-6.35277795791626
1599482656.4877348	9	-3.270270347595215
1599483271.5264149	10	-4.349999904632568
1599483872.8781404	11	-9.06315803527832
1599484484.9107807	12	-6.502631664276123
1599485095.2250745	13	-6.180769443511963
1599485708.2546945	14	-5.295348644256592
1599486324.911553	15	-6.202173709869385
1599486938.0987186	16	-5.583333492279053
1599487541.1151772	17	-5.136363506317139
1599488143.867136	18	-4.449999809265137
1599488749.6069481	19	-4.6315789222717285
1599489358.606927	20	-6.895454406738281
1599489966.3251722	21	-2.521052598953247
1599490576.265267	22	-3.373913049697876
1599491179.9792664	23	-5.192307472229004
1599491774.8814573	24	-3.343902349472046
1599492362.218354	25	-5.690476417541504
1599492957.0529802	26	-4.994444370269775
1599493549.7620826	27	-2.2750000953674316
1599494137.7928057	28	-3.9289474487304688
1599494721.1356103	29	-4.541860580444336
1599495302.9652178	30	-3.7297873497009277
1599495887.1536283	31	-4.440000057220459
1599496473.6119022	32	-5.055263042449951
1599497056.0014334	33	-6.2658538818359375
1599497642.5898402	34	-5.915789604187012
1599498235.699195	35	-3.3919999599456787
1599498825.7006643	36	-2.6844444274902344
1599499421.9161212	37	-2.0822222232818604
1599500012.002297	38	-3.894594669342041
1599500603.731161	39	-2.779069662094116
1599501190.6395118	40	-8.193333625793457
1599501769.1192274	41	-2.990000009536743
1599502355.8192916	42	-4.255882263183594
1599502940.470523	43	-5.123255729675293
1599503530.9897652	44	-4.65625
1599504111.229985	45	-3.7750000953674316
1599504691.333773	46	-4.356818199157715
1599505273.2019677	47	-3.682926893234253
1599505861.9929352	48	-2.4708333015441895
1599506440.331775	49	-2.861363649368286
1599507028.7696612	50	-4.509756088256836
1599507614.184274	51	-3.143749952316284
1599508201.2778115	52	-3.991891860961914
1599508795.6093433	53	-3.978431463241577
1599509383.6057339	54	-6.393617153167725
1599509990.3869948	55	-3.4795453548431396
1599510579.048348	56	-5.383636474609375
1599511166.2291424	57	-4.9139533042907715
1599511755.4780865	58	-3.2592592239379883
1599512346.204748	59	-4.525531768798828
1599512935.750563	60	-3.9852941036224365
1599513518.8293998	61	-4.329268455505371
1599514099.0143802	62	-3.819047689437866
1599514678.7662075	63	-4.90749979019165
1599515265.7780688	64	-3.885714292526245
1599515850.480998	65	-4.4472222328186035
1599516436.1949394	66	-2.7696969509124756
1599517016.5285254	67	-4.863265514373779
1599517593.6689847	68	-4.242499828338623
1599518169.6815054	69	-4.128571510314941
1599518758.9483886	70	-4.851162910461426
1599519343.8478575	71	-5.012195110321045
1599519932.278964	72	-1.774999976158142
1599520535.024897	73	-2.0399999618530273
1599521123.3061771	74	-3.277419328689575
1599521705.5323958	75	-3.8147058486938477
1599522303.3801773	76	-4.146666526794434
1599522887.8499248	77	-4.742222309112549
1599523469.0396426	78	-2.9647059440612793
1599524047.995542	79	-3.5093750953674316
1599524636.2312012	80	-2.581818103790283
1599525210.389219	81	-3.282352924346924
1599525811.0895216	82	-3.8648147583007812
1599526391.3154516	83	-4.043181896209717
1599526972.0059562	84	-3.0999999046325684
1599527554.399175	85	-4.9823527336120605
1599528137.0691502	86	-4.609755992889404
1599528720.3811948	87	-4.139534950256348
1599529303.8323138	88	-3.4844443798065186
1599529881.632517	89	-2.0230770111083984
1599530457.5871463	90	-5.804878234863281
1599531034.7078588	91	-5.4564104080200195
1599531611.3968015	92	-5.576666831970215
1599532185.4836876	93	-4.325714111328125
1599532772.2386243	94	-2.788095235824585
1599533344.7582128	95	-4.30555534362793
1599533916.0951688	96	-5.4488372802734375
1599534492.9552648	97	-5.383333206176758
1599535074.6573193	98	-3.2454545497894287
1599535623.3265865	99	-3.442500114440918
1599536088.1162145	100	-3.3880951404571533
