# Supplementary material
Source: ML conference proceedings conference paper supplement (https://proceedings.mlr.press/v139/rahman21a.html)
Supplement: Supplementary file 3 [file rahman21a-supp.zip › ICMLSupportingDoc 2/Visualization/OpenFortAttackRes/TRAIN/MADDPG/run-.-tag-Rewards_adhoc_train.csv]

Wall time	Step	Value
1611064239.1523626	0	-4.199999809265137
1611065071.3962133	50	-6.686110973358154
1611065930.9854088	100	-5.7468085289001465
1611066786.699665	150	-4.735483646392822
1611067650.7054443	200	-5.784999847412109
1611068526.739128	250	-5.5
1611069397.2055287	300	-7.185714244842529
1611070256.6462343	350	-6.838235378265381
1611071119.687026	400	-4.5837836265563965
1611071988.6753502	450	-6.1307692527771
1611072865.6826324	500	-6.004255294799805
1611073740.0025635	550	-5.238095283508301
1611074611.6792884	600	-4.010344982147217
1611075484.4883592	650	-7.628889083862305
1611076374.2092013	700	-5.278947353363037
1611077248.49296	750	-4.864285945892334
1611078126.6826847	800	-6.384210586547852
1611079004.7360635	850	-5.685294151306152
1611079873.7751095	900	-8.34000015258789
1611080754.6558273	950	-4.386363506317139
1611081636.8189025	1000	-4.69655179977417
1611082510.5666974	1050	-7.525000095367432
1611083391.992866	1100	-8.407691955566406
1611084263.3903039	1150	-4.5239129066467285
1611085133.8504362	1200	-6.0756754875183105
1611086029.2492843	1250	-4.717777729034424
1611086919.0103745	1300	-4.495744705200195
1611087809.0595767	1350	-6.392857074737549
1611088702.6261575	1400	-6.411110877990723
1611089595.2880135	1450	-5.043478488922119
1611090482.6746511	1500	-4.689655303955078
1611091365.552026	1550	-7.789473533630371
1611092278.2626045	1600	-3.909090995788574
1611093155.16785	1650	-5.484848499298096
1611094032.4498718	1700	-4.4146342277526855
1611094931.2896214	1750	-6.029411792755127
1611095812.9744751	1800	-5.681579113006592
1611096717.214304	1850	-5.9030303955078125
1611097607.0077271	1900	-6.429999828338623
1611098517.6080742	1950	-4.351219654083252
1611099410.1247828	2000	-5.028571605682373
1611100301.268159	2050	-5.04878044128418
1611101191.280478	2100	-5.505714416503906
1611102081.2331784	2150	-3.58695650100708
1611102970.4861321	2200	-8.6875
1611103881.7652416	2250	-5.5714287757873535
1611104767.4570498	2300	-8.541666984558105
1611105657.772594	2350	-4.725490093231201
1611106529.0857987	2400	-5.415094375610352
1611107407.8031356	2450	-4.5471696853637695
1611108291.6314852	2500	-6.099999904632568
1611109180.9361408	2550	-8.894737243652344
1611110053.4082208	2600	-6.54054069519043
1611110949.2282245	2650	-4.9772725105285645
1611111848.5776765	2700	-8.949999809265137
1611112740.7974753	2750	-8.600000381469727
1611113638.050181	2800	-7.326315879821777
1611114532.1502213	2850	-5.4292683601379395
1611115432.5827715	2900	-2.4813952445983887
1611116322.6820276	2950	-4.7419352531433105
1611117225.6031036	3000	-3.4634146690368652
1611118132.4180028	3050	-4.468085289001465
1611119038.5981057	3100	-4.837209224700928
1611119938.6564562	3150	-6.625
1611120836.7361813	3200	-4.288888931274414
1611121738.2072752	3250	-5.134042739868164
1611122616.8155315	3300	-2.9037036895751953
1611123517.1144757	3350	-6.134042739868164
1611124433.47697	3400	-2.91304349899292
1611125334.1033869	3450	-3.5729730129241943
1611126205.914026	3500	-4.008823394775391
1611127093.8815937	3550	-5.960000038146973
1611127988.0277023	3600	-6.7228569984436035
1611128870.4505696	3650	-7.163636207580566
1611129750.4521055	3700	-5.59499979019165
1611130624.204334	3750	-5.661904811859131
1611131506.585211	3800	-1.6857142448425293
1611132390.1553955	3850	-3.9928572177886963
1611133294.018742	3900	-3.538461446762085
1611134197.7589295	3950	-4.697958946228027
1611135087.755088	4000	-3.612903118133545
1611135976.2677338	4050	-5.34375
1611136883.151291	4100	-5.475925922393799
1611137787.421912	4150	-5.047618865966797
1611138698.4268203	4200	-3.9431371688842773
1611139598.595428	4250	-5.454347610473633
1611140488.5788577	4300	-4.846153736114502
1611141384.8500423	4350	-5.751111030578613
1611142284.0218618	4400	-4.743589878082275
1611143186.0293937	4450	-5.077550888061523
1611144087.672616	4500	-7.666666507720947
1611144996.615824	4550	-4.371794700622559
1611145901.105233	4600	-6.8275861740112305
1611146800.8790188	4650	-5.9391303062438965
1611147697.8022928	4700	-6.497222423553467
1611148586.4800544	4750	-6.545714378356934
1611149485.9141161	4800	-4.958333492279053
1611150402.0120697	4850	-6.233333110809326
1611151308.8748355	4900	-4.889999866485596
1611152058.518294	4950	-3.0064516067504883
1611152693.7646499	5000	-6.488636493682861
