# Supplementary material
Source: ML conference proceedings conference paper supplement (https://proceedings.mlr.press/v139/rahman21a.html)
Supplement: Supplementary file 3 [file rahman21a-supp.zip › ICMLSupportingDoc 2/Visualization/OpenFortAttackRes/TRAIN/MADDPG/run-.-tag-Rewards_adhoc_train2.csv]

Wall time	Step	Value
1611064259.2223718	0	-6.402857303619385
1611065086.3232465	50	-5.364285945892334
1611065933.002721	100	-6.680434703826904
1611066782.9548311	150	-4.917778015136719
1611067634.4348505	200	-6.087500095367432
1611068475.550967	250	-5.710526466369629
1611069348.3466582	300	-5.5
1611070221.4071834	350	-6.506382942199707
1611071091.1221774	400	-7.752380847930908
1611071957.15726	450	-6.452272891998291
1611072822.6530056	500	-5.164102554321289
1611073684.16216	550	-4.091428756713867
1611074548.2468925	600	-6.340000152587891
1611075415.91016	650	-6.4962263107299805
1611076266.6822193	700	-5.014285564422607
1611077126.0169253	750	-5.986842155456543
1611077995.2846406	800	-5.553333282470703
1611078860.6485379	850	-7.6421051025390625
1611079723.1814969	900	-5.971795082092285
1611080603.4668372	950	-3.954838752746582
1611081480.986835	1000	-6.4052629470825195
1611082350.519752	1050	-7.300000190734863
1611083206.6881788	1100	-4.706451416015625
1611084064.553021	1150	-5.545454502105713
1611084922.8327823	1200	-4.032608509063721
1611085783.412677	1250	-4.153846263885498
1611086649.0265584	1300	-4.800000190734863
1611087509.21592	1350	-4.461538314819336
1611088377.2590325	1400	-4.372093200683594
1611089232.118993	1450	-5.026315689086914
1611090084.5487938	1500	-5.642857074737549
1611090960.1109316	1550	-4.222222328186035
1611091826.1664884	1600	-5.137930870056152
1611092698.2286646	1650	-4.714285850524902
1611093596.1994894	1700	-8.333333015441895
1611094477.661633	1750	-5.909090995788574
1611095342.3198657	1800	-6.515151500701904
1611096196.0040176	1850	-4.161290168762207
1611097043.6150055	1900	-5.103448390960693
1611097898.312298	1950	-4.599999904632568
1611098770.7189255	2000	-5.355555534362793
1611099633.0182521	2050	-4.918367385864258
1611100501.602518	2100	-3.903225898742676
1611101361.7274876	2150	-4.862069129943848
1611102226.8220444	2200	-4.958333492279053
1611103101.4141142	2250	-3.471428632736206
1611103944.621365	2300	-5.784313678741455
1611104837.2703917	2350	-5.777777671813965
1611105728.1680958	2400	-3.0322580337524414
1611106613.781598	2450	-6.685714244842529
1611107512.9704368	2500	-6.485714435577393
1611108409.1655018	2550	-4.976744174957275
1611109286.569737	2600	-4.509433746337891
1611110178.2105463	2650	-7.7727274894714355
1611111054.4416277	2700	-4.481481552124023
1611111931.868243	2750	-4.878787994384766
1611112805.11995	2800	-4.22857141494751
1611113685.5930145	2850	-4.691666603088379
1611114578.369511	2900	-5.75
1611115443.97533	2950	-3.7058823108673096
1611116318.3347752	3000	-4.354838848114014
1611117194.5154483	3050	-4.534883499145508
1611118061.4268274	3100	-4.73913049697876
1611118937.4536734	3150	-5.953658580780029
1611119804.868435	3200	-3.9268293380737305
1611120686.8042529	3250	-3.444999933242798
1611121567.220182	3300	-5.125
1611122453.1027925	3350	-5.717391490936279
1611123320.6430607	3400	-4.918919086456299
1611124190.0983036	3450	-6.709677219390869
1611125059.687594	3500	-4.01578950881958
1611125935.5558276	3550	-2.506666660308838
1611126812.5766134	3600	-4.404255390167236
1611127679.472681	3650	-5.418518543243408
1611128558.474618	3700	-4.849999904632568
1611129438.604843	3750	-8.65384578704834
1611130323.00685	3800	-3.655555486679077
1611131208.2193666	3850	-8.90625
1611132101.706636	3900	-4.037036895751953
1611132998.254117	3950	-5.4285712242126465
1611133867.2864387	4000	-6.550000190734863
1611134760.0258417	4050	-6.28157901763916
1611135649.0678155	4100	-5.078378200531006
1611136514.9617991	4150	-9.222222328186035
1611137383.9541478	4200	-4.247826099395752
1611138258.2158089	4250	-4.3119049072265625
1611139131.110716	4300	-5.486486434936523
1611140006.8898268	4350	-4.837209224700928
1611140891.7333932	4400	-5.374509811401367
1611141763.2237985	4450	-5.093181610107422
1611142641.665705	4500	-5.067741870880127
1611143521.5605154	4550	-1.4184210300445557
1611144397.9665656	4600	-7.333333492279053
1611145266.6174595	4650	-3.4972972869873047
1611146147.8844838	4700	-5.0
1611147035.368726	4750	-3.7428572177886963
1611147907.4166179	4800	-5.923255920410156
1611148779.687186	4850	-4.960975646972656
1611149662.3189216	4900	-4.167567729949951
1611150548.498076	4950	-3.7849056720733643
1611151426.7937565	5000	-5.4033331871032715
