# Supplementary material
Source: ML conference proceedings conference paper supplement (https://proceedings.mlr.press/v139/rahman21a.html)
Supplement: Supplementary file 3 [file rahman21a-supp.zip › ICMLSupportingDoc 2/Visualization/OpenFortAttackRes/TRAIN/MADDPG/run-.-tag-Rewards_adhoc_train3.csv]

Wall time	Step	Value
1611064270.5222852	0	-4.306666851043701
1611065124.134675	50	-6.3921051025390625
1611065980.0108242	100	-6.76200008392334
1611066838.35771	150	-5.449999809265137
1611067686.7476745	200	-4.594285488128662
1611068546.2822163	250	-3.7249999046325684
1611069392.652099	300	-6.38837194442749
1611070248.8565238	350	-7.196875095367432
1611071095.1184468	400	-5.266666889190674
1611071957.567572	450	-4.783636569976807
1611072810.972629	500	-8.171428680419922
1611073663.580308	550	-4.408571243286133
1611074514.6316805	600	-6.831250190734863
1611075367.3421223	650	-5.346808433532715
1611076227.6014469	700	-5.721052646636963
1611077098.6097853	750	-4.094594478607178
1611077974.2384465	800	-5.23421049118042
1611078844.1629174	850	-5.8956522941589355
1611079717.7559555	900	-3.8019607067108154
1611080588.4535046	950	-6.2317070960998535
1611081469.932947	1000	-5.360465049743652
1611082345.5591073	1050	-5.681395530700684
1611083214.2719514	1100	-3.4454545974731445
1611084090.351007	1150	-4.956756591796875
1611084969.522727	1200	-4.021276473999023
1611085835.294653	1250	-5.354838848114014
1611086700.944407	1300	-4.078571319580078
1611087562.972554	1350	-3.950000047683716
1611088434.2276146	1400	-5.116279125213623
1611089303.8930073	1450	-5.012499809265137
1611090177.7640011	1500	-5.127659797668457
1611091048.794092	1550	-3.277083396911621
1611091909.0774722	1600	-6.275000095367432
1611092781.383188	1650	-4.248571395874023
1611093662.3802078	1700	-4.420512676239014
1611094555.0923085	1750	-5.127659797668457
1611095428.0932078	1800	-5.358139514923096
1611096293.6906018	1850	-6.113792896270752
1611097178.6638334	1900	-5.415909290313721
1611098054.3828683	1950	-4.45510196685791
1611098935.7714932	2000	-4.714285850524902
1611099818.4234142	2050	-4.545652389526367
1611100687.350043	2100	-4.833333492279053
1611101568.782387	2150	-3.7166666984558105
1611102445.0296378	2200	-5.1785712242126465
1611103324.4089916	2250	-3.3617022037506104
1611104200.7487376	2300	-5.266666889190674
1611105098.2660177	2350	-3.503225803375244
1611105981.2843595	2400	-5.375
1611106862.9267519	2450	-3.4625000953674316
1611107744.139019	2500	-3.3217391967773438
1611108622.5939116	2550	-4.716216087341309
1611109506.5773814	2600	-3.1521739959716797
1611110413.351077	2650	-5.860465049743652
1611111291.7672439	2700	-5.344827651977539
1611112163.6543784	2750	-4.628571510314941
1611113062.4801683	2800	-4.089473724365234
1611113950.5712624	2850	-3.7419354915618896
1611114849.5753953	2900	-6.4384613037109375
1611115729.6554682	2950	-5.283783912658691
1611116605.874158	3000	-6.0411763191223145
1611117475.2684124	3050	-1.9199999570846558
1611118346.5785096	3100	-5.888888835906982
1611119210.537209	3150	-5.568181991577148
1611120074.1429002	3200	-5.273684024810791
1611120938.2979684	3250	-3.763636350631714
1611121816.7264535	3300	-3.7896552085876465
1611122693.0847611	3350	-4.636363506317139
1611123560.9439929	3400	-6.536734580993652
1611124432.4104593	3450	-5.756097793579102
1611125302.5850918	3500	-4.602222442626953
1611126193.313601	3550	-6.243243217468262
1611127097.0307107	3600	-4.6972222328186035
1611127992.1577544	3650	-5.747222423553467
1611128879.0255563	3700	-5.513461589813232
1611129755.6987948	3750	-5.229729652404785
1611130649.5410602	3800	-4.679999828338623
1611131534.8933687	3850	-8.229629516601562
1611132431.3440216	3900	-5.368750095367432
1611133318.658298	3950	-3.3924999237060547
1611134198.8699317	4000	-5.181395530700684
1611135083.488668	4050	-6.021276473999023
1611135954.8836393	4100	-4.789130210876465
1611136838.106365	4150	-4.463043689727783
1611137716.0786352	4200	-5.836111068725586
1611138571.6122355	4250	-5.058823585510254
1611139433.291191	4300	-5.052083492279053
1611140313.8085294	4350	-5.29714298248291
1611141195.6570058	4400	-3.5039215087890625
1611142059.393718	4450	-4.291999816894531
1611142928.0380878	4500	-5.909090995788574
1611143785.9967642	4550	-5.4347825050354
1611144647.637029	4600	-5.243902206420898
1611145514.8175035	4650	-2.857692241668701
1611146387.219074	4700	-4.058823585510254
1611147245.492925	4750	-6.115624904632568
1611148119.2234862	4800	-5.127500057220459
1611148984.4336557	4850	-5.620689868927002
1611149845.7610066	4900	-5.270270347595215
1611150705.2241974	4950	-5.960000038146973
1611151550.194877	5000	-5.397368431091309
