# Supplementary material
Source: ML conference proceedings conference paper supplement (https://proceedings.mlr.press/v139/rahman21a.html)
Supplement: Supplementary file 3 [file rahman21a-supp.zip › ICMLSupportingDoc 2/Visualization/OpenFortAttackRes/TRAIN/MADDPG/run-.-tag-Rewards_adhoc_train4.csv]

Wall time	Step	Value
1611064281.6915238	0	-5.763157844543457
1611065144.7422419	50	-6.426315784454346
1611066020.0647306	100	-3.1447367668151855
1611066892.0982656	150	-6.710000038146973
1611067766.4702594	200	-4.280434608459473
1611068632.1138704	250	-5.442857265472412
1611069499.7070425	300	-5.5
1611070356.454003	350	-5.638095378875732
1611071215.4564376	400	-5.1314287185668945
1611072064.2981951	450	-8.333333015441895
1611072917.4563904	500	-5.290909290313721
1611073757.663779	550	-4.822500228881836
1611074612.2643464	600	-6.4783782958984375
1611075478.9732504	650	-6.502500057220459
1611076333.0587916	700	-5.539999961853027
1611077191.3446538	750	-5.612195014953613
1611078052.319583	800	-6.490909099578857
1611078909.588866	850	-4.980000019073486
1611079777.1373606	900	-5.240740776062012
1611080648.023521	950	-4.047916889190674
1611081519.3519905	1000	-5.047059059143066
1611082369.8601952	1050	-3.229729652404785
1611083236.057701	1100	-3.972972869873047
1611084104.6084104	1150	-5.1913042068481445
1611084968.999036	1200	-5.232608795166016
1611085821.8666756	1250	-4.043902397155762
1611086688.229871	1300	-5.439393997192383
1611087552.0127382	1350	-3.375
1611088418.859692	1400	-4.160869598388672
1611089284.2413356	1450	-3.88611102104187
1611090155.2225995	1500	-5.831818103790283
1611091035.1520178	1550	-3.52368426322937
1611091920.309681	1600	-4.121276378631592
1611092807.0262902	1650	-4.074999809265137
1611093683.8666997	1700	-4.114285945892334
1611094557.675193	1750	-6.377777576446533
1611095431.410303	1800	-5.127272605895996
1611096297.2850025	1850	-5.514285564422607
1611097168.0724206	1900	-4.148979663848877
1611098026.2361162	1950	-5.84761905670166
1611098877.85426	2000	-4.511627674102783
1611099743.439404	2050	-3.8333332538604736
1611100607.3292627	2100	-5.415384769439697
1611101473.9562082	2150	-5.775000095367432
1611102343.388077	2200	-4.949999809265137
1611103207.078425	2250	-3.25
1611104071.4149354	2300	-4.028571605682373
1611104943.9342422	2350	-8.526315689086914
1611105820.5562694	2400	-3.6578948497772217
1611106710.918827	2450	-3.538461446762085
1611107607.700054	2500	-5.515151500701904
1611108503.6872544	2550	-4.099999904632568
1611109390.1153555	2600	-3.777777671813965
1611110262.1574974	2650	-3.5897436141967773
1611111116.904946	2700	-5.094594478607178
1611111985.0530689	2750	-4.352941036224365
1611112859.4117477	2800	-5.202000141143799
1611113741.2526395	2850	-5.819149017333984
1611114621.2248445	2900	-5.864285945892334
1611115510.9014933	2950	-5.306000232696533
1611116380.8676012	3000	-4.330232620239258
1611117245.1452699	3050	-4.577777862548828
1611118103.1653552	3100	-4.313793182373047
1611118970.4563897	3150	-4.214285850524902
1611119845.6574798	3200	-4.9666666984558105
1611120711.2860255	3250	-4.6744184494018555
1611121587.6667519	3300	-5.297872543334961
1611122456.8654492	3350	-4.972727298736572
1611123334.5780327	3400	-3.7387096881866455
1611124206.8599172	3450	-5.677419185638428
1611125082.541455	3500	-5.117647171020508
1611125971.6440053	3550	-5.8913044929504395
1611126847.8082871	3600	-3.2146341800689697
1611127721.7453587	3650	-3.856097459793091
1611128600.7243342	3700	-5.204545497894287
1611129491.1249182	3750	-3.8478260040283203
1611130373.9301987	3800	-5.736842155456543
1611131263.4609277	3850	-4.904255390167236
1611132161.1160297	3900	-6.114583492279053
1611133046.9848912	3950	-4.276190280914307
1611133938.0144668	4000	-7.869565010070801
1611134835.613192	4050	-4.477419376373291
1611135714.3240457	4100	-5.838461399078369
1611136587.5367985	4150	-4.923529624938965
1611137450.3585684	4200	-6.5731706619262695
1611138339.57355	4250	-4.907142639160156
1611139230.2170045	4300	-4.705999851226807
1611140102.2400844	4350	-5.236666679382324
1611140967.3775816	4400	-4.014814853668213
1611141849.7031279	4450	-8.890909194946289
1611142736.151609	4500	-4.624489784240723
1611143623.2503972	4550	-5.273333549499512
1611144497.3198957	4600	-3.0941176414489746
1611145372.1060362	4650	-6.205882549285889
1611146240.700105	4700	-5.378261089324951
1611147115.9093027	4750	-7.392307758331299
1611147988.5309253	4800	-3.0727272033691406
1611148875.8359194	4850	-4.375675678253174
1611149758.1285603	4900	-6.0176472663879395
1611150634.5301201	4950	-6.205882549285889
1611151510.2909043	5000	-4.840000152587891
