# Supplementary material
Source: ML conference proceedings conference paper supplement (https://proceedings.mlr.press/v139/rahman21a.html)
Supplement: Supplementary file 3 [file rahman21a-supp.zip › ICMLSupportingDoc 2/Visualization/OpenFortAttackRes/TRAIN/MADDPG/run-.-tag-Rewards_adhoc_train5.csv]

Wall time	Step	Value
1611064288.7534637	0	-5.636363506317139
1611065150.6384246	50	-6.351515293121338
1611066043.5550933	100	-5.8822221755981445
1611066917.2905095	150	-6.348571300506592
1611067802.6475382	200	-6.035555362701416
1611068696.8411937	250	-5.224489688873291
1611069569.423328	300	-6.188679218292236
1611070440.3882399	350	-5.82424259185791
1611071302.2815714	400	-4.025000095367432
1611072170.105274	450	-5.0216217041015625
1611073031.6750472	500	-6.321875095367432
1611073906.885953	550	-5.330434799194336
1611074774.8487952	600	-5.740476131439209
1611075647.8036776	650	-5.932258129119873
1611076513.1080444	700	-5.709090709686279
1611077380.3254156	750	-5.73191499710083
1611078238.4749625	800	-2.9000000953674316
1611079107.6467483	850	-8.800000190734863
1611079963.3294055	900	-4.909090995788574
1611080829.9995983	950	-5.305405616760254
1611081697.5864768	1000	-5.175609588623047
1611082566.4924836	1050	-5.302041053771973
1611083434.2170439	1100	-6.351219654083252
1611084309.7459195	1150	-3.183871030807495
1611085184.6744165	1200	-4.670370578765869
1611086066.533944	1250	-7.758333206176758
1611086948.519629	1300	-7.962963104248047
1611087832.5826943	1350	-5.746666431427002
1611088724.9151905	1400	-4.538461685180664
1611089614.0194972	1450	-2.823255777359009
1611090513.762098	1500	-3.423076868057251
1611091408.6703694	1550	-4.1258063316345215
1611092313.6730864	1600	-4.129032135009766
1611093191.9190352	1650	-5.026190280914307
1611094059.9485524	1700	-5.785294055938721
1611094945.1150892	1750	-6.015384674072266
1611095829.7681026	1800	-4.216279029846191
1611096724.420023	1850	-4.219444274902344
1611097619.4183524	1900	-4.315789699554443
1611098524.3729508	1950	-8.25
1611099412.0700767	2000	-3.6956522464752197
1611100310.5111344	2050	-6.441176414489746
1611101211.706549	2100	-4.824999809265137
1611102103.2210479	2150	-5.800000190734863
1611102994.3870525	2200	-5.0
1611103894.6757193	2250	-3.738095283508301
1611104781.389289	2300	-5.190476417541504
1611105663.744039	2350	-5.222222328186035
1611106543.5167687	2400	-5.8125
1611107429.5996718	2450	-4.238095283508301
1611108302.3596563	2500	-4.882608890533447
1611109189.6181858	2550	-3.9800000190734863
1611110076.8848138	2600	-5.696969509124756
1611110963.1346414	2650	-5.7431817054748535
1611111853.4123414	2700	-4.3447370529174805
1611112743.5010476	2750	-5.856410026550293
1611113626.1242733	2800	-5.980769157409668
1611114506.45812	2850	-4.604650974273682
1611115385.2768433	2900	-4.88095235824585
1611116266.3765619	2950	-4.629787445068359
1611117161.4735477	3000	-3.3717949390411377
1611118048.6488318	3050	-3.8574469089508057
1611118932.038721	3100	-4.625
1611119826.5740974	3150	-4.169047832489014
1611120728.3631063	3200	-4.157894611358643
1611121611.1801083	3250	-5.381249904632568
1611122503.9361863	3300	-6.974999904632568
1611123393.6797087	3350	-6.347727298736572
1611124280.663152	3400	-4.932652950286865
1611125164.5350337	3450	-9.222222328186035
1611126030.3665037	3500	-3.4814815521240234
1611126906.8574622	3550	-4.514814853668213
1611127786.924241	3600	-6.761538505554199
1611128670.434616	3650	-3.9452381134033203
1611129545.7904704	3700	-4.754761695861816
1611130417.6289918	3750	-5.591111183166504
1611131298.5246518	3800	-6.714285850524902
1611132165.3594108	3850	-4.290322780609131
1611133042.302823	3900	-8.923076629638672
1611133937.1777084	3950	-6.4571428298950195
1611134836.9581542	4000	-4.349999904632568
1611135731.8804789	4050	-6.034482955932617
1611136627.434394	4100	-3.828571319580078
1611137526.1015942	4150	-4.287233829498291
1611138412.8204358	4200	-4.565454483032227
1611139311.6323745	4250	-3.7723405361175537
1611140194.4319708	4300	-8.786956787109375
1611141064.403214	4350	-6.109090805053711
1611141940.891862	4400	-6.150000095367432
1611142819.7161586	4450	-4.451282024383545
1611143701.6834266	4500	-4.410256385803223
1611144597.0394351	4550	-4.112245082855225
1611145474.508638	4600	-5.10357141494751
1611146354.9504497	4650	-5.4571428298950195
1611147251.143419	4700	-5.262499809265137
1611148143.1869373	4750	-8.833333015441895
1611149042.622135	4800	-3.606818199157715
1611149949.5828865	4850	-5.780645370483398
1611150847.354591	4900	-3.1960785388946533
1611151683.6075616	4950	-3.2730770111083984
1611152373.6854246	5000	-5.651351451873779
