# Supplementary material
Source: ML conference proceedings conference paper supplement (https://proceedings.mlr.press/v139/rahman21a.html)
Supplement: Supplementary file 3 [file rahman21a-supp.zip › ICMLSupportingDoc 2/Visualization/OpenFortAttackRes/TRAIN/MADDPG/run-.-tag-Rewards_adhoc_train6.csv]

Wall time	Step	Value
1611064298.5280938	0	-6.247058868408203
1611065172.4214313	50	-6.220512866973877
1611066055.14228	100	-7.136538505554199
1611066927.4358141	150	-6.967647075653076
1611067809.9039755	200	-5.230000019073486
1611068691.7627447	250	-5.872222423553467
1611069571.4875762	300	-6.9595746994018555
1611070435.0003123	350	-4.5698113441467285
1611071295.7900834	400	-6.589189052581787
1611072156.6802568	450	-5.525000095367432
1611073025.8816376	500	-5.079999923706055
1611073896.0614655	550	-4.887754917144775
1611074770.4610991	600	-5.859523773193359
1611075638.7540925	650	-6.792683124542236
1611076516.2761326	700	-5.03000020980835
1611077378.6915588	750	-6.02142858505249
1611078257.748602	800	-5.105882167816162
1611079129.9740877	850	-5.509090900421143
1611080006.6463573	900	-7.599999904632568
1611080880.2559085	950	-5.512820720672607
1611081745.603962	1000	-8.059090614318848
1611082611.949078	1050	-5.978947162628174
1611083474.7094145	1100	-3.845161199569702
1611084341.374901	1150	-4.925000190734863
1611085224.4131098	1200	-3.0433332920074463
1611086128.2126977	1250	-5.642857074737549
1611087018.1680164	1300	-4.775510311126709
1611087901.920307	1350	-6.6086955070495605
1611088792.6894693	1400	-1.3333333730697632
1611089678.8165047	1450	-6.443589687347412
1611090565.3007624	1500	-3.627272844314575
1611091449.8875065	1550	-4.5
1611092361.714873	1600	-5.546000003814697
1611093236.7242725	1650	-5.696969509124756
1611094108.987603	1700	-5.651612758636475
1611094994.4787097	1750	-5.083333492279053
1611095871.829013	1800	-6.679411888122559
1611096768.9192758	1850	-5.666666507720947
1611097660.4318976	1900	-4.389795780181885
1611098555.9255779	1950	-4.315789699554443
1611099441.6786046	2000	-4.756097793579102
1611100315.9673977	2050	-5.148148059844971
1611101195.5946639	2100	-4.5
1611102084.7340832	2150	-5.469387531280518
1611102971.4778526	2200	-6.241379261016846
1611103867.5386903	2250	-5.487179279327393
1611104751.6429148	2300	-6.02439022064209
1611105643.9377036	2350	-3.581395387649536
1611106516.4335513	2400	-3.940000057220459
1611107366.22813	2450	-5.081080913543701
1611108240.6301792	2500	-5.73913049697876
1611109121.9464722	2550	-7.783783912658691
1611109993.5653174	2600	-3.473684310913086
1611110891.84193	2650	-5.145454406738281
1611111792.4628289	2700	-3.8611111640930176
1611112688.0288475	2750	-3.8333332538604736
1611113575.815332	2800	-5.243902206420898
1611114455.0162807	2850	-4.346938610076904
1611115349.9263241	2900	-5.58695650100708
1611116235.1735065	2950	-4.566037654876709
1611117122.41072	3000	-4.074285507202148
1611118011.7121289	3050	-4.181818008422852
1611118902.6517308	3100	-5.17391300201416
1611119781.5098286	3150	-3.6388888359069824
1611120675.7182846	3200	-5.375
1611121579.1800747	3250	-5.791666507720947
1611122470.6481507	3300	-3.9245283603668213
1611123377.1986544	3350	-4.767441749572754
1611124279.0808537	3400	-4.927659511566162
1611125164.1203377	3450	-8.526315689086914
1611126038.5290349	3500	-5.628261089324951
1611126917.7347395	3550	-5.480645179748535
1611127812.4358773	3600	-4.550943374633789
1611128702.8855217	3650	-5.9685187339782715
1611129580.9238303	3700	-5.441176414489746
1611130465.253528	3750	-6.04878044128418
1611131352.274829	3800	-6.422222137451172
1611132233.9663289	3850	-5.818749904632568
1611133122.377749	3900	-5.849999904632568
1611134020.1259768	3950	-6.124324321746826
1611134908.6500425	4000	-4.186046600341797
1611135785.7597558	4050	-4.516279220581055
1611136687.0991817	4100	-5.506249904632568
1611137573.3136222	4150	-5.761904716491699
1611138470.838835	4200	-4.324999809265137
1611139373.5596044	4250	-5.474073886871338
1611140261.9313617	4300	-4.5851850509643555
1611141146.2161534	4350	-5.392857074737549
1611142036.4272363	4400	-5.023684024810791
1611142921.3258708	4450	-4.203703880310059
1611143806.591567	4500	-6.368000030517578
1611144700.6229463	4550	-6.21875
1611145591.1842842	4600	-4.365714073181152
1611146493.8508563	4650	-5.705263137817383
1611147393.217161	4700	-5.039583206176758
1611148285.1011639	4750	-6.772413730621338
1611149171.6834357	4800	-4.9448981285095215
1611150073.554358	4850	-5.130434989929199
1611150959.6006927	4900	-4.1823530197143555
1611151794.9372725	4950	-5.378261089324951
1611152486.711647	5000	-4.4375
