# Supplementary material
Source: ML conference proceedings conference paper supplement (https://proceedings.mlr.press/v139/rahman21a.html)
Supplement: Supplementary file 3 [file rahman21a-supp.zip › ICMLSupportingDoc 2/Visualization/OpenFortAttackRes/TRAIN/MADDPG/run-.-tag-Rewards_adhoc_train7.csv]

Wall time	Step	Value
1611064304.5373883	0	-4.240624904632568
1611065129.026157	50	-8.255999565124512
1611065977.0551982	100	-6.464285850524902
1611066831.5853562	150	-5.970270156860352
1611067692.4923878	200	-4.155882358551025
1611068542.3513732	250	-6.900000095367432
1611069417.5948675	300	-5.804166793823242
1611070301.800767	350	-7.6237287521362305
1611071177.3013432	400	-5.4243903160095215
1611072045.4633517	450	-3.8651163578033447
1611072905.9272385	500	-4.858333110809326
1611073761.098346	550	-6.754838943481445
1611074629.8153572	600	-8.11463451385498
1611075495.188798	650	-5.060606002807617
1611076345.3257523	700	-5.635897636413574
1611077202.8624704	750	-5.351851940155029
1611078064.7898185	800	-5.6823530197143555
1611078941.218779	850	-5.597959041595459
1611079818.1862876	900	-3.6184210777282715
1611080691.1329148	950	-7.746153831481934
1611081561.7710645	1000	-5.769697189331055
1611082428.6907947	1050	-5.835294246673584
1611083294.3437045	1100	-5.406383037567139
1611084159.844198	1150	-6.599999904632568
1611085025.5226092	1200	-6.148484706878662
1611085874.0929043	1250	-5.900000095367432
1611086727.5735857	1300	-4.389473915100098
1611087587.8203125	1350	-4.400000095367432
1611088445.0843127	1400	-3.516216278076172
1611089300.6752522	1450	-5.1270833015441895
1611090162.666584	1500	-2.8499999046325684
1611091036.946127	1550	-6.05384635925293
1611091922.765775	1600	-5.628302097320557
1611092801.5423038	1650	-5.759259223937988
1611093710.6240788	1700	-2.5999999046325684
1611094592.3510244	1750	-5.8098039627075195
1611095455.5843775	1800	-5.692307472229004
1611096322.0337436	1850	-5.315789699554443
1611097177.1172369	1900	-5.762856960296631
1611098030.4622898	1950	-6.034482955932617
1611098905.4686973	2000	-6.907407283782959
1611099775.3969069	2050	-5.142499923706055
1611100632.6201506	2100	-7.217647075653076
1611101506.557141	2150	-3.9574999809265137
1611102367.2614272	2200	-5.15625
1611103236.276137	2250	-5.736842155456543
1611104088.457443	2300	-4.852941036224365
1611104966.5418372	2350	-4.36734676361084
1611105850.912154	2400	-7.900000095367432
1611106745.980384	2450	-6.6052632331848145
1611107640.377474	2500	-5.589743614196777
1611108520.8955147	2550	-3.60606050491333
1611109379.5958188	2600	-3.8378379344940186
1611110267.7233517	2650	-5.840909004211426
1611111148.5552351	2700	-5.456521511077881
1611112026.7671528	2750	-7.432432651519775
1611112900.2502463	2800	-4.0217390060424805
1611113803.171366	2850	-5.602083206176758
1611114692.8262606	2900	-3.9473683834075928
1611115564.7062488	2950	-6.1875
1611116459.9875293	3000	-8.17391300201416
1611117339.3593626	3050	-5.813513278961182
1611118220.1908143	3100	-4.947368621826172
1611119096.9808767	3150	-6.136585235595703
1611119984.0106256	3200	-4.2866668701171875
1611120854.2377143	3250	-5.324999809265137
1611121735.4610152	3300	-6.108163356781006
1611122615.2893703	3350	-5.1785712242126465
1611123480.2667723	3400	-4.442500114440918
1611124347.846357	3450	-2.621875047683716
1611125215.1106396	3500	-5.878787994384766
1611126103.4698112	3550	-3.9318182468414307
1611126981.7426271	3600	-5.4193549156188965
1611127856.438266	3650	-5.305405616760254
1611128735.9504752	3700	-5.933333396911621
1611129624.4638088	3750	-4.592156887054443
1611130502.1692805	3800	-5.376923084259033
1611131384.4150817	3850	-5.211428642272949
1611132273.742213	3900	-5.321276664733887
1611133148.9019816	3950	-3.0833332538604736
1611134028.5539463	4000	-5.435483932495117
1611134909.607045	4050	-3.5372092723846436
1611135782.956622	4100	-5.823529243469238
1611136649.876204	4150	-5.4170732498168945
1611137529.290439	4200	-4.590909004211426
1611138400.6744747	4250	-6.438297748565674
1611139258.2821257	4300	-5.023255825042725
1611140124.658865	4350	-8.44444465637207
1611141005.8640776	4400	-4.503846168518066
1611141898.2113783	4450	-1.662500023841858
1611142792.445103	4500	-6.520833492279053
1611143683.1980414	4550	-5.021276473999023
1611144571.718751	4600	-5.481481552124023
1611145450.728983	4650	-6.6534881591796875
1611146320.9496646	4700	-6.376923084259033
1611147182.0535939	4750	-4.048888683319092
1611148037.091241	4800	-4.193333148956299
1611148902.5054343	4850	-5.375675678253174
1611149756.681164	4900	-4.048571586608887
1611150603.6476455	4950	-5.646808624267578
1611151462.3802166	5000	-4.590322494506836
