# Supplementary material
Source: ML conference proceedings conference paper supplement (https://proceedings.mlr.press/v139/rahman21a.html)
Supplement: Supplementary file 3 [file rahman21a-supp.zip › ICMLSupportingDoc 2/Visualization/OpenFortAttackRes/TRAIN/MADDPG/run-.-tag-Rewards_adhoc_train8.csv]

Wall time	Step	Value
1611064313.8309839	0	-5.199999809265137
1611065202.9016063	50	-6.116666793823242
1611066096.4451725	100	-5.011627674102783
1611066991.4332092	150	-5.865789413452148
1611067884.6689117	200	-6.3289475440979
1611068787.6151445	250	-6.133333206176758
1611069662.9103506	300	-6.151219367980957
1611070535.3971586	350	-6.872727394104004
1611071403.063209	400	-5.359523773193359
1611072270.7974527	450	-4.0707316398620605
1611073143.949395	500	-8.1159086227417
1611074013.2613494	550	-6.841463565826416
1611074867.7116532	600	-5.196969509124756
1611075714.0158908	650	-7.686363697052002
1611076574.9328065	700	-7.443589687347412
1611077437.5374126	750	-4.860975742340088
1611078295.9808614	800	-6.065000057220459
1611079160.9716802	850	-4.722499847412109
1611080018.6241086	900	-5.443181991577148
1611080875.1412897	950	-4.517948627471924
1611081735.9789448	1000	-4.177419185638428
1611082601.133934	1050	-3.319999933242798
1611083466.9778454	1100	-6.218181610107422
1611084340.3361843	1150	-7.077142715454102
1611085209.098136	1200	-3.208695650100708
1611086095.3902965	1250	-8.472222328186035
1611086979.891195	1300	-0.5666666626930237
1611087864.4084833	1350	-3.1782608032226562
1611088747.6568332	1400	-4.214285850524902
1611089638.4639642	1450	-6.17714262008667
1611090521.8047454	1500	-5.282978534698486
1611091406.0346923	1550	-4.550000190734863
1611092276.0906677	1600	-5.268181800842285
1611093152.8558009	1650	-5.788095474243164
1611094003.8669214	1700	-3.4106383323669434
1611094889.17311	1750	-4.904545307159424
1611095773.7557027	1800	-4.4285712242126465
1611096659.122098	1850	-5.284782409667969
1611097542.0443847	1900	-5.849999904632568
1611098445.7111082	1950	-4.535555362701416
1611099331.7408175	2000	-6.43137264251709
1611100230.921882	2050	-4.679411888122559
1611101112.1153016	2100	-5.060606002807617
1611101989.7910004	2150	-4.264102458953857
1611102879.0277088	2200	-4.487179279327393
1611103777.1693509	2250	-4.273684024810791
1611104653.1007326	2300	-4.486486434936523
1611105533.4068415	2350	-4.641025543212891
1611106398.7652073	2400	-5.645161151885986
1611107267.2146106	2450	-4.102040767669678
1611108132.6789026	2500	-4.511627674102783
1611109008.7529242	2550	-5.698113441467285
1611109877.104047	2600	-4.8325581550598145
1611110751.484287	2650	-3.2333333492279053
1611111643.4909408	2700	-3.238095283508301
1611112520.4113498	2750	-6.005882263183594
1611113396.3145697	2800	-6.7317070960998535
1611114288.1462362	2850	-6.390244007110596
1611115182.0722268	2900	-5.395833492279053
1611116067.7596176	2950	-3.8333332538604736
1611116963.5233374	3000	-3.4833333492279053
1611117856.679638	3050	-5.146808624267578
1611118756.4647157	3100	-4.779545307159424
1611119642.681679	3150	-8.05555534362793
1611120536.8093462	3200	-5.103448390960693
1611121407.5816061	3250	-5.42307710647583
1611122276.3637953	3300	-4.092682838439941
1611123168.873908	3350	-4.609090805053711
1611124053.4909968	3400	-3.6666667461395264
1611124948.5864148	3450	-5.814634323120117
1611125826.6345634	3500	-4.046428680419922
1611126709.4786363	3550	-6.15238094329834
1611127598.3002565	3600	-4.935294151306152
1611128490.2488368	3650	-3.5
1611129367.719923	3700	-5.910810947418213
1611130245.819014	3750	-7.148717880249023
1611131118.1958675	3800	-3.251281976699829
1611131981.2361467	3850	-6.822580814361572
1611132858.8181217	3900	-5.408888816833496
1611133749.404516	3950	-2.5981132984161377
1611134626.880281	4000	-5.0645833015441895
1611135525.277081	4050	-5.174468040466309
1611136422.2003398	4100	-4.926315784454346
1611137325.0202255	4150	-5.440425395965576
1611138255.0428524	4200	-5.199999809265137
1611139179.4402273	4250	-5.8027777671813965
1611140089.0289886	4300	-2.2037036418914795
1611141003.7591436	4350	-4.676315784454346
1611141902.5652497	4400	-4.9666666984558105
1611142798.7253299	4450	-6.593999862670898
1611143704.3064466	4500	-5.144444465637207
1611144600.191804	4550	-4.551111221313477
1611145508.90701	4600	-5.733333110809326
1611146400.9951227	4650	-4.288235187530518
1611147289.537249	4700	-6.139583110809326
1611148183.7094338	4750	-5.760000228881836
1611149079.7879252	4800	-3.1914286613464355
1611149975.1427817	4850	-9.0
1611150866.6014457	4900	-8.396153450012207
1611151711.356912	4950	-4.985714435577393
1611152424.62016	5000	-5.1689653396606445
