# Supplementary material
Source: ML conference proceedings conference paper supplement (https://proceedings.mlr.press/v139/rahman21a.html)
Supplement: Supplementary file 3 [file rahman21a-supp.zip › ICMLSupportingDoc 2/Visualization/OpenFortAttackRes/TRAIN/MADDPG_test/run-.-tag-Rewards_adhoc_test.csv]

Wall time	Step	Value
1611064241.754273	0	-8.270000457763672
1611065076.6818624	50	-5.651724338531494
1611065936.5605156	100	-5.306666851043701
1611066791.4478297	150	-6.7703704833984375
1611067658.7582226	200	-4.223913192749023
1611068532.9909363	250	-8.28125
1611069403.0835626	300	-5.268571376800537
1611070261.3027155	350	-5.139285564422607
1611071127.0124297	400	-6.066666603088379
1611071994.5286894	450	-5.0722222328186035
1611072871.9053938	500	-4.502702713012695
1611073745.7663395	550	-5.61621618270874
1611074616.4809523	600	-7.791304111480713
1611075490.6694274	650	-6.0837836265563965
1611076379.295035	700	-6.674193382263184
1611077253.7741814	750	-5.769999980926514
1611078133.2014296	800	-4.4476189613342285
1611079010.1645086	850	-2.9437499046325684
1611079878.4225845	900	-4.303225994110107
1611080759.210023	950	-7.754838943481445
1611081641.4507031	1000	-2.5321428775787354
1611082514.7425923	1050	-7.9476189613342285
1611083397.3463209	1100	-0.971875011920929
1611084268.2047007	1150	-8.850000381469727
1611085138.736378	1200	-5.24399995803833
1611086038.0262847	1250	-5.940740585327148
1611086924.0477083	1300	-5.317857265472412
1611087813.8069656	1350	-4.0320000648498535
1611088708.5992274	1400	-4.77142858505249
1611089603.1702108	1450	-5.904255390167236
1611090491.3851264	1500	-4.448888778686523
1611091372.7577353	1550	-3.971428632736206
1611092292.3273757	1600	-6.800000190734863
1611093159.3607395	1650	-9.182353019714355
1611094038.409055	1700	-5.150000095367432
1611094937.011866	1750	-6.653124809265137
1611095821.8736665	1800	-3.5893616676330566
1611096722.4136868	1850	-3.825000047683716
1611097612.1227336	1900	-4.21481466293335
1611098522.288002	1950	-9.119047164916992
1611099418.4066672	2000	-4.3222222328186035
1611100308.722185	2050	-5.135000228881836
1611101196.6245189	2100	-6.003846168518066
1611102086.6450384	2150	-4.465384483337402
1611102977.9755323	2200	-1.6648648977279663
1611103887.4401453	2250	-5.637499809265137
1611104774.8361456	2300	-4.565000057220459
1611105662.6357074	2350	-5.261538505554199
1611106535.5720642	2400	-4.34375
1611107412.5010893	2450	-5.8275861740112305
1611108296.4000452	2500	-8.25
1611109188.6080053	2550	-3.177500009536743
1611110058.978793	2600	-4.129032135009766
1611110954.7078688	2650	-5.813793182373047
1611111853.6131287	2700	-5.6785712242126465
1611112749.7655656	2750	-4.146808624267578
1611113642.6065493	2800	-5.777777671813965
1611114537.7972248	2850	-3.9451613426208496
1611115438.8235881	2900	-4.108108043670654
1611116329.9844215	2950	-6.759090900421143
1611117231.0353332	3000	-4.573333263397217
1611118136.6517913	3050	-8.11111068725586
1611119043.6771603	3100	-4.013792991638184
1611119944.1523993	3150	-5.643750190734863
1611120842.295589	3200	-5.5
1611121742.9448676	3250	-8.270833015441895
1611122622.2201316	3300	-2.7642858028411865
1611123524.009799	3350	-5.697825908660889
1611124441.5233226	3400	-4.744444370269775
1611125339.8702548	3450	-7.418181896209717
1611126210.4237201	3500	-3.921739101409912
1611127098.531396	3550	-8.25
1611127996.6311984	3600	-4.516326427459717
1611128876.1504216	3650	-8.603225708007812
1611129758.8761954	3700	-4.084782600402832
1611130630.1399653	3750	-3.8303029537200928
1611131511.346302	3800	-4.259259223937988
1611132396.922786	3850	-3.856410264968872
1611133301.7930992	3900	-5.974999904632568
1611134202.782837	3950	-4.888461589813232
1611135093.578628	4000	-4.068420886993408
1611135981.0561044	4050	-4.811110973358154
1611136890.167831	4100	-5.742105484008789
1611137792.0057304	4150	-7.9708333015441895
1611138704.4497814	4200	-6.702702522277832
1611139603.1801972	4250	-7.958333492279053
1611140493.0164993	4300	-5.078260898590088
1611141390.580389	4350	-6.562857151031494
1611142291.831376	4400	-6.2959184646606445
1611143191.5389025	4450	-7.234375
1611144092.8471267	4500	-5.0
1611145002.2300272	4550	-6.994871616363525
1611145905.9996197	4600	-6.710000038146973
1611146808.3654897	4650	-5.328888893127441
1611147703.657103	4700	-5.385714054107666
1611148593.9954872	4750	-6.25
1611149492.5789137	4800	-5.002702713012695
1611150407.9109783	4850	-5.161110877990723
1611151313.1566503	4900	-3.4666666984558105
1611152062.7893822	4950	-3.768749952316284
1611152696.251684	5000	-8.610526084899902
