# Supplementary material
Source: ML conference proceedings conference paper supplement (https://proceedings.mlr.press/v139/rahman21a.html)
Supplement: Supplementary file 3 [file rahman21a-supp.zip › ICMLSupportingDoc 2/Visualization/OpenFortAttackRes/TRAIN/MADDPG_test/run-.-tag-Rewards_adhoc_test2.csv]

Wall time	Step	Value
1611064262.4846027	0	-4.2208333015441895
1611065091.7914445	50	-5.890909194946289
1611065940.7449656	100	-4.320000171661377
1611066788.226913	150	-4.764285564422607
1611067638.756023	200	-8.554545402526855
1611068481.2923896	250	-5.6028571128845215
1611069352.6247106	300	-7.599999904632568
1611070230.0895858	350	-6.099999904632568
1611071095.8349364	400	-6.288000106811523
1611071962.4605272	450	-2.3032257556915283
1611072827.5208814	500	-6.3606061935424805
1611073688.9261873	550	-5.923333168029785
1611074553.2949667	600	-7.260606288909912
1611075423.020259	650	-5.25
1611076272.0598886	700	-4.991428375244141
1611077132.7544549	750	-6.318604469299316
1611078001.8198268	800	-7.242553234100342
1611078867.234158	850	-4.8822221755981445
1611079728.3685396	900	-6.057575702667236
1611080610.2473874	950	-4.631249904632568
1611081487.3724165	1000	-4.876923084259033
1611082354.683456	1050	-7.973913192749023
1611083212.7774653	1100	-3.481818199157715
1611084072.636393	1150	-4.448979377746582
1611084927.1367702	1200	-8.589473724365234
1611085788.8219182	1250	-4.627999782562256
1611086653.3383048	1300	-8.19473648071289
1611087514.333989	1350	-5.380000114440918
1611088381.8539586	1400	-4.655172348022461
1611089236.0417843	1450	-8.585714340209961
1611090090.1239135	1500	-6.121212005615234
1611090966.2907798	1550	-4.4242424964904785
1611091830.986103	1600	-6.1192307472229
1611092704.676151	1650	-5.70263147354126
1611093600.6480868	1700	-9.208695411682129
1611094483.6347134	1750	-2.111764669418335
1611095346.8431637	1800	-8.795454978942871
1611096202.0131962	1850	-5.188235282897949
1611097049.8919764	1900	-3.569230794906616
1611097904.441066	1950	-5.591891765594482
1611098778.6636777	2000	-5.290909290313721
1611099636.8165486	2050	-8.633333206176758
1611100505.6776862	2100	-7.900000095367432
1611101367.444131	2150	-5.791428565979004
1611102232.1464071	2200	-3.7333333492279053
1611103105.1288326	2250	-8.894737243652344
1611103951.8981678	2300	-3.595238208770752
1611104841.740237	2350	-8.727272987365723
1611105735.917244	2400	-5.42553186416626
1611106618.990786	2450	-5.043333530426025
1611107520.6442208	2500	-5.170833110809326
1611108415.0412972	2550	-6.5428571701049805
1611109291.0612893	2600	-5.537036895751953
1611110184.2592661	2650	-5.699999809265137
1611111059.6733022	2700	-7.21875
1611111937.7813754	2750	-4.038888931274414
1611112810.4269257	2800	-1.8035714626312256
1611113690.535297	2850	-4.180769443511963
1611114583.4948478	2900	-4.607142925262451
1611115448.3735619	2950	-5.553333282470703
1611116323.0533822	3000	-5.346153736114502
1611117201.2480686	3050	-4.489999771118164
1611118065.387098	3100	-8.352941513061523
1611118944.5390754	3150	-5.139534950256348
1611119809.947252	3200	-5.677419185638428
1611120690.9770954	3250	-3.621739149093628
1611121576.2926981	3300	-5.430434703826904
1611122459.9304576	3350	-4.057142734527588
1611123328.4232337	3400	-4.0227274894714355
1611124195.9711072	3450	-6.709677219390869
1611125065.576687	3500	-6.0789475440979
1611125940.4772313	3550	-4.636666774749756
1611126816.105055	3600	-8.0
1611127685.0845592	3650	-6.625
1611128566.407728	3700	-4.849999904632568
1611129444.5785954	3750	-6.688571453094482
1611130328.2694395	3800	-5.4193549156188965
1611131214.574061	3850	-5.648648738861084
1611132107.070585	3900	-6.028124809265137
1611133003.470522	3950	-4.537036895751953
1611133872.6595974	4000	-4.272413730621338
1611134765.2382083	4050	-5.439285755157471
1611135653.3491073	4100	-6.52222204208374
1611136520.6693072	4150	-4.460000038146973
1611137390.8832238	4200	-4.757500171661377
1611138265.8364842	4250	-4.245238304138184
1611139138.762814	4300	-5.023255825042725
1611140013.5865474	4350	-3.240476131439209
1611140895.8319757	4400	-9.050000190734863
1611141768.087587	4450	-8.426922798156738
1611142648.307848	4500	-5.012820720672607
1611143527.508774	4550	-3.1111111640930176
1611144402.8238075	4600	-5.444117546081543
1611145273.3346887	4650	-5.204761981964111
1611146152.5617657	4700	-5.6785712242126465
1611147040.7582605	4750	-6.342857360839844
1611147912.9507592	4800	-3.1290323734283447
1611148786.6588624	4850	-2.989473581314087
1611149669.2360036	4900	-5.635000228881836
1611150554.0464268	4950	-6.543749809265137
1611151431.7469585	5000	-7.5366668701171875
