# Supplementary material
Source: ML conference proceedings conference paper supplement (https://proceedings.mlr.press/v139/rahman21a.html)
Supplement: Supplementary file 3 [file rahman21a-supp.zip › ICMLSupportingDoc 2/Visualization/OpenFortAttackRes/TRAIN/MADDPG_test/run-.-tag-Rewards_adhoc_test3.csv]

Wall time	Step	Value
1611064274.6810067	0	-4.986207008361816
1611065129.8280954	50	-5.9285712242126465
1611065985.8407187	100	-4.962500095367432
1611066844.844966	150	-5.284615516662598
1611067692.367583	200	-6.349999904632568
1611068551.064057	250	-5.449999809265137
1611069398.255897	300	-6.099999904632568
1611070254.9908514	350	-4.907894611358643
1611071100.7232523	400	-5.425000190734863
1611071963.4386518	450	-5.778378486633301
1611072817.2950914	500	-3.664102554321289
1611073669.3496428	550	-6.058974266052246
1611074520.4410732	600	-5.562162399291992
1611075372.5342114	650	-4.527272701263428
1611076233.1059983	700	-5.161110877990723
1611077102.5269444	750	-7.900000095367432
1611077978.4869874	800	-8.309523582458496
1611078848.7178693	850	-7.2185187339782715
1611079722.973717	900	-5.629411697387695
1611080593.5710738	950	-4.122580528259277
1611081475.6321232	1000	-4.436363697052002
1611082351.240887	1050	-5.268571376800537
1611083219.599798	1100	-4.806666851043701
1611084095.4827268	1150	-6.651724338531494
1611084978.3949745	1200	-5.646938800811768
1611085840.4361987	1250	-6.089285850524902
1611086705.6759045	1300	-5.596551895141602
1611087569.9479399	1350	-4.745238304138184
1611088439.647279	1400	-5.793103218078613
1611089310.558412	1450	-5.210256576538086
1611090185.5130715	1500	-3.17391300201416
1611091054.7002125	1550	-4.203225612640381
1611091914.0816233	1600	-3.092592477798462
1611092786.5589662	1650	-4.18148136138916
1611093668.559452	1700	-4.5676469802856445
1611094559.565234	1750	-7.900000095367432
1611095435.8256226	1800	-5.713953495025635
1611096299.6990154	1850	-5.7484846115112305
1611097183.7585447	1900	-4.777419567108154
1611098060.2594283	1950	-4.98421049118042
1611098943.200802	2000	-3.590909004211426
1611099822.9392982	2050	-6.275862216949463
1611100694.3444567	2100	-4.30930233001709
1611101572.96817	2150	-8.05555534362793
1611102449.079437	2200	-8.536842346191406
1611103332.3159506	2250	-4.07446813583374
1611104205.8349903	2300	-6.986207008361816
1611105104.1110046	2350	-5.06969690322876
1611105985.9961739	2400	-5.73199987411499
1611106868.2651956	2450	-5.22857141494751
1611107749.3418252	2500	-6.057575702667236
1611108627.0869362	2550	-5.71999979019165
1611109511.0901124	2600	-3.2799999713897705
1611110418.6650977	2650	-4.031034469604492
1611111297.455426	2700	-4.648484706878662
1611112168.553421	2750	-3.361290216445923
1611113067.7221246	2800	-6.03636360168457
1611113954.9980206	2850	-8.680952072143555
1611114853.8220294	2900	-8.883333206176758
1611115737.603801	2950	-4.165217399597168
1611116612.236356	3000	-6.051281929016113
1611117480.3399477	3050	-6.865624904632568
1611118351.0531905	3100	-7.989999771118164
1611119215.8511655	3150	-4.061290264129639
1611120078.8302133	3200	-3.1827585697174072
1611120943.4110143	3250	-3.1677420139312744
1611121822.1336987	3300	-4.880000114440918
1611122698.8829637	3350	-4.9882354736328125
1611123565.0328236	3400	-3.003999948501587
1611124439.6795897	3450	-4.837209224700928
1611125311.2815373	3500	-4.514583110809326
1611126199.2825067	3550	-5.02571439743042
1611127101.7454016	3600	-3.3115384578704834
1611127997.6106274	3650	-6.25
1611128885.399126	3700	-5.150000095367432
1611129761.3527148	3750	-4.666666507720947
1611130654.2678437	3800	-1.656000018119812
1611131541.1112802	3850	-5.246341228485107
1611132435.6182258	3900	-7.810526371002197
1611133324.3582168	3950	-5.590909004211426
1611134205.0865247	4000	-5.188571453094482
1611135088.8299491	4050	-6.938709735870361
1611135963.335937	4100	-5.0577778816223145
1611136842.9451237	4150	-3.6666667461395264
1611137720.7110112	4200	-5.479310512542725
1611138576.8068671	4250	-4.311110973358154
1611139440.6586013	4300	-5.76086950302124
1611140318.5860538	4350	-6.234615325927734
1611141199.7512667	4400	-9.019047737121582
1611142065.448765	4450	-4.2365851402282715
1611142933.6672964	4500	-5.606451511383057
1611143791.4453442	4550	-4.900000095367432
1611144652.4731905	4600	-6.3222222328186035
1611145520.0920708	4650	-1.7214285135269165
1611146393.961437	4700	-6.010810852050781
1611147250.8919644	4750	-6.777777671813965
1611148124.9765344	4800	-5.67435884475708
1611148992.0170743	4850	-4.599999904632568
1611149851.1588757	4900	-7.212903022766113
1611150712.5281568	4950	-4.211363792419434
1611151553.0393355	5000	-8.872221946716309
