# Supplementary material
Source: ML conference proceedings conference paper supplement (https://proceedings.mlr.press/v139/rahman21a.html)
Supplement: Supplementary file 3 [file rahman21a-supp.zip › ICMLSupportingDoc 2/Visualization/OpenFortAttackRes/TRAIN/MADDPG_test/run-.-tag-Rewards_adhoc_test4.csv]

Wall time	Step	Value
1611064287.171618	0	-6.530769348144531
1611065150.5629957	50	-4.894117832183838
1611066027.9354367	100	-4.313513278961182
1611066897.175248	150	-8.922222137451172
1611067772.0446486	200	-7.015151500701904
1611068637.498224	250	-2.696666717529297
1611069504.5836751	300	-5.010714054107666
1611070361.46983	350	-4.858064651489258
1611071219.9425519	400	-8.695454597473145
1611072072.2766538	450	-3.694117546081543
1611072922.8275383	500	-6.679310321807861
1611073763.2598462	550	-6.82424259185791
1611074617.9474428	600	-5.353125095367432
1611075485.0978336	650	-6.739999771118164
1611076337.889048	700	-4.7419352531433105
1611077199.7539988	750	-4.8382978439331055
1611078056.749514	800	-7.30476188659668
1611078915.8670378	850	-5.010810852050781
1611079782.5331526	900	-6.6314287185668945
1611080653.3359182	950	-4.650000095367432
1611081523.2192426	1000	-8.542105674743652
1611082373.9186563	1050	-8.160869598388672
1611083243.4599483	1100	-5.574999809265137
1611084110.9461312	1150	-5.349999904632568
1611084974.573603	1200	-4.2166666984558105
1611085828.9418223	1250	-5.1974358558654785
1611086694.6576903	1300	-6.809756278991699
1611087559.9644608	1350	-5.736734867095947
1611088428.4851096	1400	-5.624000072479248
1611089292.7069411	1450	-5.46999979019165
1611090160.2357624	1500	-7.870833396911621
1611091040.560078	1550	-5.423999786376953
1611091931.3345244	1600	-4.206666469573975
1611092812.1290126	1650	-6.846153736114502
1611093691.6304615	1700	-3.2136363983154297
1611094562.4866962	1750	-4.037499904632568
1611095436.5043657	1800	-5.259259223937988
1611096305.9803896	1850	-5.289361476898193
1611097174.292834	1900	-5.913888931274414
1611098031.2697287	1950	-4.0333333015441895
1611098883.4559484	2000	-6.911538600921631
1611099748.9444351	2050	-5.364706039428711
1611100613.8880877	2100	-5.482500076293945
1611101478.9756505	2150	-6.239999771118164
1611102351.7773478	2200	-4.31627893447876
1611103213.8841305	2250	-6.195652008056641
1611104075.1448622	2300	-7.8125
1611104948.0687857	2350	-7.929999828338623
1611105824.6093185	2400	-8.787500381469727
1611106717.2028294	2450	-3.3416666984558105
1611107612.327886	2500	-5.586206912994385
1611108510.9978645	2550	-4.936363697052002
1611109394.6931937	2600	-7.75
1611110267.587032	2650	-5.5580644607543945
1611111121.312772	2700	-5.138461589813232
1611111990.9339764	2750	-5.814285755157471
1611112865.6989775	2800	-4.897435665130615
1611113748.0683944	2850	-6.295000076293945
1611114627.6381645	2900	-3.9472222328186035
1611115515.9585984	2950	-5.571875095367432
1611116385.582998	3000	-3.3239998817443848
1611117251.8012981	3050	-6.238636493682861
1611118108.517632	3100	-5.378125190734863
1611118975.1460016	3150	-5.3692307472229
1611119851.5734968	3200	-7.3410258293151855
1611120717.4388092	3250	-6.171428680419922
1611121592.4467566	3300	-4.377777576446533
1611122463.0663195	3350	-5.748571395874023
1611123339.4669297	3400	-6.090322494506836
1611124215.0668662	3450	-5.389583110809326
1611125087.9891367	3500	-7.5
1611125978.5468795	3550	-5.392499923706055
1611126852.4263396	3600	-3.1607143878936768
1611127730.2263904	3650	-4.510416507720947
1611128605.855146	3700	-7.313333511352539
1611129496.082184	3750	-5.080769062042236
1611130379.0953536	3800	-6.016129016876221
1611131270.4795876	3850	-5.8152174949646
1611132167.363161	3900	-3.278787851333618
1611133055.2051136	3950	-4.375510215759277
1611133943.4335728	4000	-4.3655171394348145
1611134840.141547	4050	-8.168420791625977
1611135720.310344	4100	-5.2133331298828125
1611136592.4992561	4150	-3.775861978530884
1611137458.2022786	4200	-5.493750095367432
1611138346.8792713	4250	-7.313953399658203
1611139234.781555	4300	-5.596153736114502
1611140107.190001	4350	-3.8821427822113037
1611140973.8903832	4400	-3.3378379344940186
1611141857.5939267	4450	-4.3979997634887695
1611142742.3987286	4500	-3.9394736289978027
1611143627.360576	4550	-3.1519999504089355
1611144504.0337088	4600	-3.752380847930908
1611145377.912674	4650	-6.205128192901611
1611146244.595086	4700	-8.712499618530273
1611147120.3159742	4750	-2.5958333015441895
1611147992.736078	4800	-3.427999973297119
1611148881.6152413	4850	-4.894444465637207
1611149764.5241704	4900	-3.1781249046325684
1611150641.5882938	4950	-3.669767379760742
1611151514.5406458	5000	-4.070000171661377
