# Supplementary material
Source: ML conference proceedings conference paper supplement (https://proceedings.mlr.press/v139/rahman21a.html)
Supplement: Supplementary file 3 [file rahman21a-supp.zip › ICMLSupportingDoc 2/Visualization/OpenFortAttackRes/TRAIN/MADDPG_test/run-.-tag-Rewards_adhoc_test5.csv]

Wall time	Step	Value
1611064293.9828963	0	-6.212500095367432
1611065156.001722	50	-4.769999980926514
1611066053.8218086	100	-5.45319128036499
1611066923.3452523	150	-7.821875095367432
1611067808.1356363	200	-3.1307692527770996
1611068704.506579	250	-4.559999942779541
1611069575.2301438	300	-5.793103218078613
1611070446.6169503	350	-3.97352933883667
1611071307.081354	400	-5.764705657958984
1611072175.2572045	450	-6.862069129943848
1611073037.813202	500	-6.857142925262451
1611073912.5711098	550	-4.591176509857178
1611074781.2320056	600	-4.863888740539551
1611075652.1906474	650	-7.860000133514404
1611076518.243209	700	-6.72580623626709
1611077387.0023596	750	-6.170731544494629
1611078244.6939442	800	-4.183784008026123
1611079114.7747233	850	-4.461363792419434
1611079969.4862013	900	-4.471052646636963
1611080835.3313832	950	-7.635293960571289
1611081703.0986125	1000	-5.5969696044921875
1611082571.9163222	1050	-4.5580644607543945
1611083440.6624267	1100	-3.9800000190734863
1611084315.2382166	1150	-4.453571319580078
1611085189.4724169	1200	-6.8692307472229
1611086072.0300295	1250	-5.657142639160156
1611086954.2328768	1300	-6.3027777671813965
1611087837.2371755	1350	-4.065384387969971
1611088731.001885	1400	-5.088889122009277
1611089618.9929118	1450	-5.476666450500488
1611090522.827623	1500	-3.856250047683716
1611091416.4530497	1550	-4.253333568572998
1611092326.4624286	1600	-5.827026844024658
1611093197.14074	1650	-4.645161151885986
1611094064.9057841	1700	-6.764285564422607
1611094950.8984926	1750	-4.836363792419434
1611095837.9905016	1800	-4.648979663848877
1611096728.9044905	1850	-9.1304349899292
1611097626.1006012	1900	-5.357142925262451
1611098531.2103019	1950	-6.144999980926514
1611099419.1260035	2000	-4.385000228881836
1611100315.6281326	2050	-5.5
1611101219.4480999	2100	-4.140476226806641
1611102110.9731936	2150	-4.493750095367432
1611102999.0602088	2200	-9.263157844543457
1611103901.9940155	2250	-4.557142734527588
1611104788.0250173	2300	-3.2750000953674316
1611105668.1382236	2350	-8.319999694824219
1611106549.297362	2400	-6.142857074737549
1611107434.825431	2450	-3.754838705062866
1611108310.3385022	2500	-3.2787234783172607
1611109194.5342073	2550	-4.366666793823242
1611110081.3541658	2600	-9.416666984558105
1611110967.6662784	2650	-8.399999618530273
1611111860.7548747	2700	-6.135714054107666
1611112750.6922622	2750	-5.652500152587891
1611113633.1770833	2800	-3.4692306518554688
1611114513.0036852	2850	-2.9270269870758057
1611115389.8643286	2900	-3.9642856121063232
1611116272.1505842	2950	-5.921212196350098
1611117168.7714221	3000	-3.96052622795105
1611118053.3836677	3050	-5.223076820373535
1611118937.0752687	3100	-5.645161151885986
1611119831.7710965	3150	-5.818749904632568
1611120733.0957792	3200	-4.958333492279053
1611121618.8064969	3250	-4.6229166984558105
1611122509.4328098	3300	-4.516666889190674
1611123402.2251513	3350	-6.006249904632568
1611124285.721636	3400	-7.340000152587891
1611125169.924772	3450	-6.282142639160156
1611126035.0371265	3500	-2.9083333015441895
1611126912.1503153	3550	-5.10357141494751
1611127791.3455296	3600	-4.115384578704834
1611128677.5411494	3650	-4.4931817054748535
1611129550.7969534	3700	-5.526923179626465
1611130422.5271566	3750	-6.408823490142822
1611131304.253795	3800	-4.648648738861084
1611132170.4982352	3850	-5.3035712242126465
1611133048.2696078	3900	-7.083333492279053
1611133945.078595	3950	-4.397826194763184
1611134846.1171043	4000	-3.7019999027252197
1611135736.9219224	4050	-6.967647075653076
1611136635.3776693	4100	-4.740909099578857
1611137533.3261075	4150	-6.04878044128418
1611138420.988397	4200	-3.288372039794922
1611139317.1125314	4250	-3.2766666412353516
1611140201.3943589	4300	-3.971794843673706
1611141069.9389114	4350	-5.37333345413208
1611141946.1988854	4400	-5.896666526794434
1611142824.2777383	4450	-5.122580528259277
1611143706.2214599	4500	-8.479166984558105
1611144601.9365025	4550	-5.02222204208374
1611145479.6089897	4600	-5.929999828338623
1611146360.033087	4650	-4.121428489685059
1611147255.6518798	4700	-4.632143020629883
1611148149.5535064	4750	-4.132500171661377
1611149050.1805394	4800	-3.6292684078216553
1611149957.0436623	4850	-3.9560976028442383
1611150854.8385456	4900	-4.636363506317139
1611151688.0573702	4950	-4.6529412269592285
1611152376.9992795	5000	-7.795454502105713
