# Supplementary material
Source: ML conference proceedings conference paper supplement (https://proceedings.mlr.press/v139/rahman21a.html)
Supplement: Supplementary file 3 [file rahman21a-supp.zip › ICMLSupportingDoc 2/Visualization/OpenFortAttackRes/TRAIN/MADDPG_test/run-.-tag-Rewards_adhoc_test6.csv]

Wall time	Step	Value
1611064304.414006	0	-4.09354829788208
1611065179.9198322	50	-6.764583110809326
1611066061.4184546	100	-6.818420886993408
1611066935.3010035	150	-3.4906976222991943
1611067817.740911	200	-6.653191566467285
1611068697.8872864	250	-6.199999809265137
1611069576.8642278	300	-7.23199987411499
1611070441.0071292	350	-5.432258129119873
1611071300.6900935	400	-4.907407283782959
1611072162.477166	450	-5.938235282897949
1611073031.6277921	500	-7.005882263183594
1611073902.4751685	550	-4.918421268463135
1611074777.5538964	600	-3.994999885559082
1611075646.1023016	650	-7.09782600402832
1611076521.6772187	700	-6.32941198348999
1611077385.177755	750	-5.026829242706299
1611078263.017329	800	-6.5969696044921875
1611079135.7838957	850	-4.056410312652588
1611080011.484181	900	-7.854166507720947
1611080887.2440166	950	-4.991489410400391
1611081753.350551	1000	-4.144230842590332
1611082617.2263148	1050	-7.196875095367432
1611083479.7294683	1100	-2.6111111640930176
1611084348.4025116	1150	-6.2022223472595215
1611085231.4171479	1200	-4.678947448730469
1611086134.3551395	1250	-4.681081295013428
1611087023.4445407	1300	-6.1964287757873535
1611087906.9073567	1350	-4.913793087005615
1611088797.96686	1400	-4.290625095367432
1611089685.7383258	1450	-5.615217208862305
1611090570.0689929	1500	-3.2862069606781006
1611091457.0249515	1550	-5.099999904632568
1611092374.2227862	1600	-8.616000175476074
1611093241.6410131	1650	-6.878125190734863
1611094117.7648358	1700	-4.912962913513184
1611094999.453915	1750	-2.0799999237060547
1611095878.406156	1800	-5.289473533630371
1611096773.519114	1850	-5.259259223937988
1611097666.1868503	1900	-6.172973155975342
1611098561.147852	1950	-3.9633333683013916
1611099448.798256	2000	-3.625
1611100320.5506175	2050	-5.103448390960693
1611101202.7601502	2100	-4.307692527770996
1611102089.8379736	2150	-5.285714149475098
1611102978.057165	2200	-4.851428508758545
1611103875.2413425	2250	-4.755555629730225
1611104756.853489	2300	-6.290322780609131
1611105649.4491308	2350	-4.633333206176758
1611106521.0754547	2400	-3.5199999809265137
1611107370.5653987	2450	-8.67391300201416
1611108244.8934844	2500	-8.5
1611109127.3332653	2550	-6.433333396911621
1611109999.4049854	2600	-5.888888835906982
1611110899.1822228	2650	-5.360416889190674
1611111800.6252983	2700	-3.4318182468414307
1611112692.7081926	2750	-7.57692289352417
1611113582.2470691	2800	-5.358974456787109
1611114462.1409948	2850	-5.234042644500732
1611115356.5594418	2900	-4.2682929039001465
1611116240.4070926	2950	-7.4571428298950195
1611117127.66523	3000	-7.36774206161499
1611118015.2800002	3050	-9.066666603088379
1611118909.1879964	3100	-3.6763157844543457
1611119785.7933521	3150	-8.894737243652344
1611120682.3014052	3200	-6.082353115081787
1611121583.8203878	3250	-5.644000053405762
1611122475.7856674	3300	-4.226666450500488
1611123383.0600193	3350	-3.438235282897949
1611124284.2878106	3400	-5.548387050628662
1611125172.9581752	3450	-3.297959089279175
1611126044.0558648	3500	-3.078125
1611126924.5665083	3550	-4.349999904632568
1611127816.394351	3600	-9.300000190734863
1611128706.710561	3650	-8.44444465637207
1611129586.0346866	3700	-6.758620738983154
1611130471.7498941	3750	-1.5342105627059937
1611131357.465199	3800	-4.396874904632568
1611132240.440807	3850	-4.545000076293945
1611133127.1766152	3900	-4.141379356384277
1611134028.1547472	3950	-4.430769443511963
1611134914.7858846	4000	-4.171428680419922
1611135792.2591367	4050	-5.931579113006592
1611136691.0600631	4100	-8.333333015441895
1611137579.130857	4150	-3.715625047683716
1611138478.6887906	4200	-4.548936367034912
1611139377.9110594	4250	-9.195454597473145
1611140270.6068275	4300	-4.9375
1611141150.740924	4350	-4.961538314819336
1611142041.6270676	4400	-4.382143020629883
1611142929.6822355	4450	-3.5978260040283203
1611143812.536963	4500	-4.216216087341309
1611144705.0948012	4550	-3.241666555404663
1611145596.2784574	4600	-5.974999904632568
1611146498.3751936	4650	-4.932142734527588
1611147397.5726564	4700	-3.93461537361145
1611148288.8122272	4750	-8.513333320617676
1611149177.9591782	4800	-6.708571434020996
1611150080.2221866	4850	-5.085714340209961
1611150964.9378133	4900	-5.112121105194092
1611151798.9965262	4950	-5.926470756530762
1611152489.8358963	5000	-4.639999866485596
