# Supplementary material
Source: ML conference proceedings conference paper supplement (https://proceedings.mlr.press/v139/rahman21a.html)
Supplement: Supplementary file 3 [file rahman21a-supp.zip › ICMLSupportingDoc 2/Visualization/OpenFortAttackRes/TRAIN/MADDPG_test/run-.-tag-Rewards_adhoc_test7.csv]

Wall time	Step	Value
1611064307.8473196	0	-7.381249904632568
1611065134.9632616	50	-3.863333225250244
1611065987.0483186	100	-6.977358341217041
1611066838.2239888	150	-5.497499942779541
1611067698.071283	200	-8.277419090270996
1611068547.429896	250	-4.782758712768555
1611069423.0690598	300	-6.345454692840576
1611070306.1600862	350	-7.096296310424805
1611071182.7785044	400	-1.9838709831237793
1611072049.7404628	450	-8.504761695861816
1611072912.249152	500	-6.3125
1611073768.4226182	550	-6.887499809265137
1611074635.9107084	600	-5.755882263183594
1611075502.1891787	650	-4.5088887214660645
1611076349.4353406	700	-6.979166507720947
1611077206.60536	750	-7.148148059844971
1611078069.7221022	800	-8.628125190734863
1611078946.4053621	850	-6.056250095367432
1611079822.9048023	900	-4.258620738983154
1611080697.0906334	950	-6.06944465637207
1611081566.4107118	1000	-5.560714244842529
1611082434.3326678	1050	-4.677419185638428
1611083298.8848743	1100	-7.056666851043701
1611084165.974299	1150	-4.050000190734863
1611085029.8944051	1200	-8.573912620544434
1611085878.7640297	1250	-8.433333396911621
1611086733.3259785	1300	-4.313889026641846
1611087594.2511036	1350	-6.127906799316406
1611088449.1234922	1400	-8.461111068725586
1611089307.4563174	1450	-5.307499885559082
1611090167.280172	1500	-9.2380952835083
1611091042.4000716	1550	-6.0
1611091928.6302032	1600	-6.184999942779541
1611092809.1624658	1650	-5.3822221755981445
1611093715.5436594	1700	-4.884615421295166
1611094597.2922337	1750	-5.6875
1611095463.3099308	1800	-3.0088889598846436
1611096328.9030242	1850	-3.494999885559082
1611097184.2132967	1900	-8.0
1611098036.6973035	1950	-3.6794116497039795
1611098912.807732	2000	-5.134090900421143
1611099781.9106581	2050	-4.6621623039245605
1611100637.004088	2100	-8.779166221618652
1611101511.6245751	2150	-0.7964285612106323
1611102372.8356454	2200	-4.627272605895996
1611103242.9063556	2250	-4.627500057220459
1611104094.5976522	2300	-3.8378379344940186
1611104970.9426093	2350	-3.0
1611105855.7169688	2400	-7.300000190734863
1611106752.543024	2450	-3.6388888359069824
1611107646.0601497	2500	-5.5428571701049805
1611108524.8796961	2550	-8.399999618530273
1611109388.1127565	2600	-6.2959184646606445
1611110275.7759957	2650	-4.191489219665527
1611111156.1193173	2700	-5.6533331871032715
1611112032.9926429	2750	-6.351351261138916
1611112907.8111842	2800	-4.1854166984558105
1611113809.132125	2850	-4.359459400177002
1611114697.8228273	2900	-5.320689678192139
1611115569.170655	2950	-4.607999801635742
1611116466.6868875	3000	-1.8166667222976685
1611117344.8415332	3050	-5.4419355392456055
1611118225.311915	3100	-4.887096881866455
1611119102.1326141	3150	-7.241379261016846
1611119989.0942943	3200	-3.2178571224212646
1611120858.7911947	3250	-6.303225994110107
1611121742.0272117	3300	-6.010256290435791
1611122620.4335184	3350	-5.603333473205566
1611123485.5262935	3400	-5.487500190734863
1611124352.484483	3450	-5.544444561004639
1611125219.1218476	3500	-8.324999809265137
1611126110.508553	3550	-6.539130210876465
1611126989.7651448	3600	-4.687233924865723
1611127863.0148747	3650	-6.2365851402282715
1611128740.8683844	3700	-4.82692289352417
1611129630.393141	3750	-3.872727155685425
1611130510.5229044	3800	-3.8979592323303223
1611131391.1894755	3850	-5.219047546386719
1611132279.1780603	3900	-4.730302810668945
1611133154.4901767	3950	-1.6166666746139526
1611134036.4800243	4000	-4.276595592498779
1611134916.707375	4050	-7.264285564422607
1611135787.6205373	4100	-8.290475845336914
1611136656.6809828	4150	-5.376744270324707
1611137537.4912071	4200	-3.8085105419158936
1611138406.540018	4250	-5.8921051025390625
1611139263.161692	4300	-5.306896686553955
1611140129.7067575	4350	-4.326666831970215
1611141013.7470548	4400	-4.673469543457031
1611141903.974665	4450	-5.991428375244141
1611142796.1133204	4500	-8.116666793823242
1611143694.0148852	4550	-4.926414966583252
1611144578.6184237	4600	-5.4195122718811035
1611145455.2757516	4650	-8.428571701049805
1611146326.305377	4700	-6.099999904632568
1611147187.0825107	4750	-5.3290324211120605
1611148042.137755	4800	-6.696774005889893
1611148907.4931812	4850	-4.914285659790039
1611149762.5211716	4900	-5.027272701263428
1611150608.248054	4950	-6.296428680419922
1611151470.06153	5000	-4.065908908843994
