# Supplementary material
Source: ML conference proceedings conference paper supplement (https://proceedings.mlr.press/v139/rahman21a.html)
Supplement: Supplementary file 3 [file rahman21a-supp.zip › ICMLSupportingDoc 2/Visualization/OpenFortAttackRes/TRAIN/MADDPG_test/run-.-tag-Rewards_adhoc_test8.csv]

Wall time	Step	Value
1611064318.9701717	0	-2.355555534362793
1611065208.546804	50	-6.081818103790283
1611066105.4234064	100	-6.25
1611066997.022405	150	-4.589285850524902
1611067889.3591537	200	-5.19615364074707
1611068792.4366431	250	-6.276923179626465
1611069668.1633832	300	-6.203333377838135
1611070540.6506314	350	-6.44615364074707
1611071408.3496263	400	-7.03000020980835
1611072276.3678782	450	-5.3466668128967285
1611073151.578623	500	-5.6617021560668945
1611074017.5686378	550	-9.038095474243164
1611074873.344037	600	-3.4972221851348877
1611075719.394569	650	-4.261111259460449
1611076580.695242	700	-5.651428699493408
1611077444.6651185	750	-4.58297872543335
1611078303.0160122	800	-6.515555381774902
1611079168.322966	850	-5.572727203369141
1611080023.7740626	900	-6.246666431427002
1611080882.057039	950	-6.169767379760742
1611081742.3687367	1000	-5.360526084899902
1611082606.1710272	1050	-3.192307710647583
1611083475.1280568	1100	-3.5255813598632812
1611084348.5098202	1150	-4.32444429397583
1611085214.484115	1200	-5.467857360839844
1611086104.457529	1250	-4.1847825050354
1611086987.1916625	1300	-5.171111106872559
1611087870.1162748	1350	-4.154838562011719
1611088752.6544166	1400	-5.060714244842529
1611089643.8248026	1450	-5.369999885559082
1611090528.3968503	1500	-5.9219512939453125
1611091413.789509	1550	-5.156000137329102
1611092280.6321292	1600	-4.025926113128662
1611093156.7940726	1650	-8.366666793823242
1611094008.2872925	1700	-7.925000190734863
1611094894.9581234	1750	-4.513888835906982
1611095781.2234788	1800	-4.9348835945129395
1611096665.9462838	1850	-4.726190567016602
1611097550.0665004	1900	-4.095555782318115
1611098451.512006	1950	-5.790244102478027
1611099338.0019765	2000	-3.9277777671813965
1611100236.058217	2050	-4.646666526794434
1611101116.2794034	2100	-1.747826099395752
1611101994.5912735	2150	-4.341379165649414
1611102884.091988	2200	-6.814285755157471
1611103782.2571695	2250	-6.909090995788574
1611104657.6657872	2300	-7.863636493682861
1611105539.082687	2350	-5.587096691131592
1611106405.7423005	2400	-3.697561025619507
1611107274.5338187	2450	-5.9911112785339355
1611108137.207165	2500	-3.054166555404663
1611109015.715511	2550	-5.504444599151611
1611109883.7198124	2600	-5.921428680419922
1611110756.6005645	2650	-5.068965435028076
1611111649.4217515	2700	-5.839473724365234
1611112525.0270524	2750	-6.41724157333374
1611113403.1630836	2800	-2.4342105388641357
1611114293.9900465	2850	-5.3297295570373535
1611115186.9906929	2900	-7.6479997634887695
1611116072.3074975	2950	-5.367856979370117
1611116968.4774404	3000	-6.915384769439697
1611117862.9019566	3050	-7.487804889678955
1611118762.5455444	3100	-4.994999885559082
1611119647.3907058	3150	-4.9079999923706055
1611120541.7685113	3200	-6.003703594207764
1611121411.507679	3250	-8.70588207244873
1611122283.5040617	3300	-4.4911112785339355
1611123173.60904	3350	-5.933333396911621
1611124058.3679452	3400	-6.153124809265137
1611124954.408636	3450	-5.5
1611125831.019863	3500	-8.742856979370117
1611126714.6477723	3550	-5.803333282470703
1611127604.0013294	3600	-5.321621417999268
1611128495.878825	3650	-5.996774196624756
1611129373.9131866	3700	-3.977142810821533
1611130253.12698	3750	-4.473170757293701
1611131122.9056532	3800	-5.788888931274414
1611131986.2589605	3850	-7.0
1611132863.0360866	3900	-8.95714282989502
1611133753.566559	3950	-2.642307758331299
1611134632.5067666	4000	-5.4314284324646
1611135531.7110898	4050	-4.757500171661377
1611136426.9693213	4100	-6.496296405792236
1611137330.488322	4150	-7.116128921508789
1611138259.073271	4200	-7.946666717529297
1611139184.5582757	4250	-4.949999809265137
1611140096.4555652	4300	-7.460526466369629
1611141009.9494615	4350	-4.833333492279053
1611141910.3826094	4400	-5.048979759216309
1611142805.5895374	4450	-4.182051181793213
1611143711.459637	4500	-5.206818103790283
1611144608.0093594	4550	-2.930952310562134
1611145514.611339	4600	-6.532142639160156
1611146407.4658825	4650	-7.099999904632568
1611147295.044435	4700	-6.445714473724365
1611148189.004434	4750	-7.05483865737915
1611149087.3877218	4800	-5.3977274894714355
1611149980.096084	4850	-6.190908908843994
1611150871.2671435	4900	-6.715384483337402
1611151715.1361482	4950	-3.9939393997192383
1611152429.5244665	5000	-4.024444580078125
