# Supplementary material
Source: ML conference proceedings conference paper supplement (https://proceedings.mlr.press/v139/rahman21a.html)
Supplement: Supplementary file 3 [file rahman21a-supp.zip › ICMLSupportingDoc 2/Visualization/OpenShootingAccuracy/GNN-AM/run-eccbjqemxa-tag-Shooting_train_accuracy.csv]

Wall time	Step	Value
1612263245.0380235	0	nan
1612263261.1957839	1	nan
1612263273.4653008	2	0.0051107327453792095
1612263289.1061711	3	0.0182709451764822
1612263306.3737593	4	0.025641025975346565
1612263320.7171516	5	0.024449877440929413
1612263335.495681	6	0.02500000037252903
1612263354.557853	7	0.021877849474549294
1612263375.0553675	8	0.0178282018750906
1612263391.829497	9	0.023383768275380135
1612263406.74475	10	0.021381579339504242
1612263424.7147305	11	0.015649452805519104
1612263442.6617494	12	0.02083333395421505
1612263463.0118983	13	0.019672131165862083
1612263481.9352736	14	0.044609665870666504
1612263499.9792478	15	0.026149684563279152
1612263517.9537005	16	0.03741496428847313
1612263536.9949567	17	0.029126213863492012
1612263557.8001387	18	0.009009009227156639
1612263578.1528835	19	0.04838709533214569
1612263596.4679854	20	0.028355387970805168
1612263616.806079	21	0.01757066510617733
1612263635.2251384	22	0.031890660524368286
1612263654.1160107	23	0.0234375
1612263675.4601188	24	0.029394812881946564
1612263688.5608153	25	0.019138755276799202
1612263705.2383041	26	0.04093567281961441
1612263723.4505367	27	0.051575932651758194
1612263743.089306	28	0.06053268909454346
1612263765.3885393	29	0.03120124712586403
1612263782.5045755	30	0.07033639401197433
1612263803.7585616	31	0.04592422395944595
1612263821.699043	32	0.04497908055782318
1612263837.5477006	33	0.024783147498965263
1612263857.5542467	34	0.06644517928361893
1612263874.275387	35	0.08921933174133301
1612263891.6209323	36	0.06263498961925507
1612263907.763196	37	0.07223476469516754
1612263922.3545358	38	0.05649717524647713
1612263942.3515902	39	0.06179775297641754
1612263958.4999094	40	0.08411215245723724
1612263977.8598871	41	0.05097087472677231
1612264000.4060988	42	0.05044035241007805
1612264022.1572058	43	0.051254089921712875
1612264038.524899	44	0.09183673560619354
1612264059.8289328	45	0.07013574987649918
1612264081.5233626	46	0.05276381969451904
1612264099.4013073	47	0.10000000149011612
1612264119.9704137	48	0.07999999821186066
1612264134.0975437	49	0.16524216532707214
1612264154.033056	50	0.08262711763381958
1612264175.8581667	51	0.14945651590824127
1612264200.5423448	52	0.15746420621871948
1612264224.604346	53	0.26923078298568726
1612264244.7918963	54	0.1670588254928589
1612264274.3359883	55	0.23350253701210022
1612264295.0568275	56	0.13017751276493073
1612264314.8966951	57	0.2062780261039734
1612264339.1539712	58	0.17622950673103333
1612264359.2813294	59	0.12903225421905518
1612264376.4508865	60	0.1439114362001419
1612264398.467504	61	0.21509434282779694
1612264420.9967716	62	0.09150326997041702
1612264444.6068964	63	0.2696078419685364
1612264464.192107	64	0.1568181812763214
1612264485.951406	65	0.1893203854560852
1612264507.885081	66	0.23270440101623535
1612264535.076712	67	0.27899685502052307
1612264556.9109716	68	0.24651162326335907
1612264581.4753416	69	0.16569767892360687
1612264602.258849	70	0.20062695443630219
1612264624.1156871	71	0.16181229054927826
1612264643.8885965	72	0.13304093480110168
1612264664.5164797	73	0.2995951473712921
1612264685.6737306	74	0.3009118437767029
1612264706.4650908	75	0.22053231298923492
1612264721.601048	76	0.24315068125724792
1612264743.7854233	77	0.1771058291196823
1612264764.948696	78	0.15576323866844177
1612264782.5873337	79	0.2202380895614624
1612264801.5534852	80	0.2253086417913437
1612264820.8090603	81	0.2277580052614212
1612264842.0447342	82	0.22514620423316956
1612264864.2107403	83	0.2658959627151489
1612264888.6803193	84	0.14935064315795898
1612264905.7928712	85	0.20105819404125214
1612264926.791553	86	0.17573872208595276
1612264949.5863395	87	0.178048774600029
1612264973.5297298	88	0.2331932783126831
1612264995.2104907	89	0.2243436723947525
1612265014.3019283	90	0.12390488386154175
1612265034.7517414	91	0.14603616297245026
1612265053.0504396	92	0.23060797154903412
1612265075.2786584	93	0.2418426126241684
1612265097.6219609	94	0.2150537669658661
1612265122.9212158	95	0.22972972691059113
1612265146.9950936	96	0.14595375955104828
1612265163.1241384	97	0.13740457594394684
1612265190.8620937	98	0.18251928687095642
1612265212.6538458	99	0.13812784850597382
1612265241.7267032	100	0.16018307209014893
