# Supplementary material
Source: ML conference proceedings conference paper supplement (https://proceedings.mlr.press/v139/rahman21a.html)
Supplement: Supplementary file 3 [file rahman21a-supp.zip › ICMLSupportingDoc 2/Visualization/OpenShootingAccuracy/GNN-AM/run-jlgvzcuaci-tag-Shooting_train_accuracy.csv]

Wall time	Step	Value
1612265259.993575	0	nan
1612265273.2186067	1	0.023749999701976776
1612265289.9536383	2	0.013975726440548897
1612265308.4906442	3	0.02560240961611271
1612265325.385979	4	0.05154639109969139
1612265341.489243	5	0.020307354629039764
1612265359.4683683	6	0.019662922248244286
1612265372.504468	7	0.018712162971496582
1612265390.527995	8	0.017328519374132156
1612265408.0820947	9	0.021727019920945168
1612265423.5019379	10	0.03613177314400673
1612265437.0530705	11	0.03097345121204853
1612265456.0295863	12	0.03617021441459656
1612265473.8367405	13	0.038655463606119156
1612265492.199557	14	0.035433072596788406
1612265513.2152781	15	0.047756873071193695
1612265527.852002	16	0.05985915660858154
1612265546.4319334	17	0.04134367033839226
1612265563.0129502	18	0.05263157933950424
1612265584.3760326	19	0.01648700051009655
1612265599.2725961	20	0.01652892492711544
1612265616.1068578	21	0.08045977354049683
1612265630.855534	22	0.016949152573943138
1612265644.5839524	23	0.034161489456892014
1612265661.2286863	24	0.06779661029577255
1612265679.5379095	25	0.032710280269384384
1612265698.7915351	26	0.06707317382097244
1612265717.1229177	27	0.032036613672971725
1612265733.1340616	28	0.06829268485307693
1612265751.5446796	29	0.07988165318965912
1612265766.34436	30	0.08163265138864517
1612265780.2638044	31	0.06832297891378403
1612265797.6588027	32	0.04356846585869789
1612265815.0316267	33	0.03391684964299202
1612265833.864746	34	0.07079645991325378
1612265853.6973064	35	0.11702127754688263
1612265870.4523332	36	0.07296137511730194
1612265893.77962	37	0.06613756716251373
1612265909.6383228	38	0.06854838877916336
1612265925.2635543	39	0.10638298094272614
1612265945.394156	40	0.12068965286016464
1612265963.3616788	41	0.095238097012043
1612265985.4562585	42	0.12796208262443542
1612266003.9398007	43	0.0827067643404007
1612266019.56623	44	0.024904213845729828
1612266041.6644375	45	0.10697674751281738
1612266063.6135855	46	0.05779334530234337
1612266082.1526728	47	0.050660792738199234
1612266102.7494166	48	0.08262108266353607
1612266122.070331	49	0.11980440467596054
1612266144.0615928	50	0.06808510422706604
1612266165.0595577	51	0.11349692940711975
1612266188.9276798	52	0.13089005649089813
1612266208.0496142	53	0.11872146278619766
1612266229.2870371	54	0.13569322228431702
1612266248.156537	55	0.11287128925323486
1612266268.3376517	56	0.1818181872367859
1612266290.8056557	57	0.1589404046535492
1612266318.5501518	58	0.15678776800632477
1612266344.1691654	59	0.16905444860458374
1612266365.6714103	60	0.1295454502105713
1612266383.4815326	61	0.1528497338294983
1612266407.0807934	62	0.17555555701255798
1612266430.4072435	63	0.13270142674446106
1612266450.3142447	64	0.20795106887817383
1612266467.1421084	65	0.13625866174697876
1612266490.4580307	66	0.15548281371593475
1612266507.839167	67	0.12593984603881836
1612266523.816742	68	0.14953270554542542
1612266541.7879395	69	0.16516517102718353
1612266562.090652	70	0.19298245012760162
1612266585.122527	71	0.1899038404226303
1612266604.1176856	72	0.14104881882667542
1612266617.643509	73	0.12720848619937897
1612266636.8195834	74	0.21153846383094788
1612266658.6636305	75	0.15232974290847778
1612266680.181665	76	0.20615383982658386
1612266700.9931188	77	0.23384615778923035
1612266724.133681	78	0.1731843501329422
1612266744.9607155	79	0.1770833283662796
1612266766.3940823	80	0.13765181601047516
1612266788.2101989	81	0.2380952388048172
1612266813.2519028	82	0.18979591131210327
1612266833.9555357	83	0.29611650109291077
1612266858.4570682	84	0.2184615433216095
1612266886.9551537	85	0.1768447905778885
1612266916.2555594	86	0.22420634329319
1612266940.1073773	87	0.2757575809955597
1612266966.6699543	88	0.1726495772600174
1612266989.1555724	89	0.22708334028720856
1612267015.2733946	90	0.1525612473487854
1612267045.598183	91	0.19699248671531677
1612267066.0140228	92	0.21927711367607117
1612267091.2384202	93	0.18197573721408844
1612267117.3165145	94	0.2055172473192215
1612267145.9100194	95	0.1497005969285965
1612267164.5969412	96	0.1524459570646286
1612267188.7273283	97	0.278215229511261
1612267205.7356567	98	0.2644927501678467
1612267229.2678075	99	0.17091454565525055
1612267256.1729338	100	0.18124006688594818
