# Supplementary material
Source: ML conference proceedings conference paper supplement (https://proceedings.mlr.press/v139/rahman21a.html)
Supplement: Supplementary file 3 [file rahman21a-supp.zip › ICMLSupportingDoc 2/Visualization/OpenShootingAccuracy/GNN-AM/run-mhlkouvlhp-tag-Shooting_train_accuracy.csv]

Wall time	Step	Value
1612267274.4741457	0	nan
1612267292.03798	1	0.016062602400779724
1612267308.153661	2	0.017435897141695023
1612267331.9210637	3	0.018083877861499786
1612267352.7668617	4	0.016342412680387497
1612267374.2667425	5	0.01854918897151947
1612267397.5927625	6	0.019886363297700882
1612267418.032931	7	0.017770597711205482
1612267432.6807954	8	0.048064086586236954
1612267450.5501552	9	0.036346692591905594
1612267472.1693645	10	0.03054862841963768
1612267485.9566011	11	0.03811659291386604
1612267504.5010872	12	0.03404255211353302
1612267521.465114	13	0.03678929805755615
1612267536.8091838	14	0.026607539504766464
1612267559.0923917	15	0.03539822995662689
1612267578.1425183	16	0.018469657748937607
1612267597.54313	17	0.052941177040338516
1612267615.8259683	18	0.031578946858644485
1612267643.0829833	19	0.02646239474415779
1612267664.3549883	20	0.05517241358757019
1612267680.3765435	21	0.031111111864447594
1612267700.0591424	22	0.043478261679410934
1612267718.9920826	23	0.027906976640224457
1612267742.1619718	24	0.06818182021379471
1612267769.434562	25	0.05525846779346466
1612267789.4903362	26	0.04060913622379303
1612267815.6734402	27	0.047445256263017654
1612267840.3960915	28	0.0308880303055048
1612267864.994171	29	0.05263157933950424
1612267888.7853985	30	0.05232558026909828
1612267912.2632227	31	0.07717041671276093
1612267938.3542783	32	0.16959063708782196
1612267965.4061255	33	0.10884353518486023
1612267992.2607372	34	0.09333333373069763
1612268016.1457205	35	0.10483870655298233
1612268046.410894	36	0.0833333358168602
1612268072.9710112	37	0.16626505553722382
1612268100.8075476	38	0.07799766957759857
1612268125.8527894	39	0.09132420271635056
1612268150.2483985	40	0.07747747749090195
1612268169.4395566	41	0.15306122601032257
1612268195.8325536	42	0.16161616146564484
1612268222.3190048	43	0.2571428716182709
1612268254.223017	44	0.07934782654047012
1612268281.9189513	45	0.08481262624263763
1612268307.8529	46	0.13989637792110443
1612268333.1680272	47	0.25827813148498535
1612268359.4533894	48	0.13852813839912415
1612268390.0265105	49	0.16336633265018463
1612268425.7993753	50	0.2189473658800125
1612268454.3070862	51	0.18888889253139496
1612268485.8057663	52	0.08708708733320236
1612268504.3806272	53	0.12023460119962692
1612268538.244392	54	0.24390244483947754
1612268572.8732889	55	0.23297491669654846
1612268597.400046	56	0.2581818103790283
1612268621.9605188	57	0.20875421166419983
1612268652.2438817	58	0.18567639589309692
1612268675.3452697	59	0.35403725504875183
1612268709.0274057	60	0.14743590354919434
1612268738.7348278	61	0.15835776925086975
1612268763.4506645	62	0.18000000715255737
1612268786.726284	63	0.20952381193637848
1612268813.31786	64	0.17171716690063477
1612268839.6314518	65	0.3187499940395355
1612268865.8062713	66	0.24313725531101227
1612268888.229198	67	0.22594141960144043
1612268907.0799553	68	0.3835616409778595
1612268938.5414293	69	0.16129031777381897
1612268964.2228844	70	0.130952388048172
1612268983.961572	71	0.11647727340459824
1612269005.4714286	72	0.09756097197532654
1612269019.758587	73	0.26582279801368713
1612269046.6260521	74	0.11135857552289963
1612269070.2376797	75	0.12043795734643936
1612269096.4516168	76	0.19411765038967133
1612269126.6027424	77	0.15226337313652039
1612269156.360822	78	0.18309858441352844
1612269186.4789782	79	0.22171945869922638
1612269216.7173455	80	0.31284916400909424
1612269250.8200758	81	0.27807486057281494
1612269284.3838966	82	0.30588236451148987
1612269322.849244	83	0.446601927280426
1612269356.6515667	84	0.13114753365516663
1612269392.324618	85	0.14974619448184967
1612269426.3388052	86	0.2711864411830902
1612269457.2889235	87	0.18885448575019836
1612269495.2841182	88	0.28634360432624817
1612269518.1020908	89	0.13934426009655
1612269552.4836843	90	0.2222222238779068
1612269581.9446805	91	0.30263158679008484
1612269617.094505	92	0.30092594027519226
1612269646.6761932	93	0.18218623101711273
1612269672.401549	94	0.14957265555858612
1612269702.5990825	95	0.23442137241363525
1612269733.501947	96	0.4375
1612269755.1553562	97	0.1729106605052948
1612269778.196576	98	0.3899371027946472
1612269810.8876188	99	0.2631579041481018
1612269838.4867814	100	0.2110091745853424
