# Supplementary material
Source: ML conference proceedings conference paper supplement (https://proceedings.mlr.press/v139/rahman21a.html)
Supplement: Supplementary file 3 [file rahman21a-supp.zip › ICMLSupportingDoc 2/Visualization/OpenShootingAccuracy/GNN-AM/run-rqudscjlys-tag-Shooting_train_accuracy.csv]

Wall time	Step	Value
1612269866.5447602	0	0.014118792489171028
1612269893.572121	1	0.014052411541342735
1612269916.55257	2	0.02099151350557804
1612269935.8978412	3	0.018766755238175392
1612269958.820536	4	0.023668639361858368
1612269983.360874	5	0.01913580298423767
1612270010.335005	6	0.050847455859184265
1612270035.2924554	7	0.02649414725601673
1612270057.2530458	8	0.016447369009256363
1612270077.2156842	9	0.03655913844704628
1612270099.21831	10	0.013351134955883026
1612270127.1882942	11	0.011594203300774097
1612270152.3942893	12	0.03002309426665306
1612270180.7831745	13	0.033707864582538605
1612270200.1277263	14	0.03711790218949318
1612270226.0528944	15	0.03530895337462425
1612270251.8009748	16	0.008658008649945259
1612270276.1233366	17	0.02469135820865631
1612270301.6500351	18	0.03503184765577316
1612270330.547785	19	0.008438818156719208
1612270350.5102901	20	0.01923076994717121
1612270373.717282	21	0.027303753420710564
1612270394.6816165	22	0.07407407462596893
1612270416.9633422	23	0.027272727340459824
1612270437.6724222	24	0.031578946858644485
1612270457.642995	25	0.029010238125920296
1612270480.004194	26	0.02850877121090889
1612270505.0442426	27	0.095238097012043
1612270528.8458488	28	0.0833333358168602
1612270553.7203715	29	0.020387358963489532
1612270575.3223608	30	0.06666667014360428
1612270591.9110909	31	0.046783626079559326
1612270621.1082711	32	0.04854368790984154
1612270643.3905344	33	0.1004566177725792
1612270670.2570214	34	0.03629032149910927
1612270693.370962	35	0.024930747225880623
1612270721.322172	36	0.03632478788495064
1612270751.5745897	37	0.04848484694957733
1612270783.5716217	38	0.08208955079317093
1612270816.8585427	39	0.10000000149011612
1612270842.7513416	40	0.08737864345312119
1612270868.0278337	41	0.0670926496386528
1612270894.5555449	42	0.0833333358168602
1612270921.4605823	43	0.10135135054588318
1612270950.0160222	44	0.046296294778585434
1612270974.5897892	45	0.15311004221439362
1612270997.2108958	46	0.08189655095338821
1612271027.9021776	47	0.07017543911933899
1612271055.578417	48	0.1764705926179886
1612271081.4004655	49	0.1428571492433548
1612271101.9495258	50	0.09876543283462524
1612271127.9330378	51	0.1036585345864296
1612271152.141492	52	0.10471203923225403
1612271179.2170057	53	0.1875
1612271214.1245966	54	0.10452961921691895
1612271251.6163287	55	0.22713863849639893
1612271287.970159	56	0.21014492213726044
1612271318.9587154	57	0.11025144904851913
1612271346.9072416	58	0.20000000298023224
1612271370.691246	59	0.13227513432502747
1612271397.6369405	60	0.14946618676185608
1612271427.052402	61	0.08240534365177155
1612271453.2760074	62	0.14979757368564606
1612271484.766499	63	0.2046332061290741
1612271510.4310093	64	0.14022988080978394
1612271538.6952422	65	0.17977528274059296
1612271564.1445296	66	0.20444443821907043
1612271592.4663606	67	0.2808988690376282
1612271615.8836842	68	0.1463414579629898
1612271642.787808	69	0.2072829157114029
1612271673.2391872	70	0.21038250625133514
1612271702.214562	71	0.1806722730398178
1612271731.962175	72	0.1872909665107727
1612271762.4475052	73	0.20365534722805023
1612271786.615681	74	0.1550000011920929
1612271809.0156858	75	0.2083333283662796
1612271841.0739965	76	0.15399999916553497
1612271864.6636467	77	0.09677419066429138
1612271892.7767124	78	0.31578946113586426
1612271919.0639787	79	0.14696486294269562
1612271944.4413526	80	0.3448275923728943
1612271976.9467015	81	0.30075186491012573
1612272007.1739974	82	0.15942029654979706
1612272033.5157871	83	0.3273381292819977
1612272059.7601738	84	0.12456747144460678
1612272081.8528333	85	0.20000000298023224
1612272108.111002	86	0.24406780302524567
1612272132.739363	87	0.2245989292860031
1612272162.0131915	88	0.22413793206214905
1612272193.237046	89	0.227027028799057
1612272221.4187906	90	0.31120333075523376
1612272252.7458525	91	0.31481480598449707
1612272285.787805	92	0.21830986440181732
1612272310.5991473	93	0.18266253173351288
1612272335.211791	94	0.1708860695362091
1612272360.7391741	95	0.15128205716609955
1612272388.90641	96	0.2376873642206192
1612272409.220841	97	0.15405406057834625
1612272435.5578437	98	0.17733989655971527
1612272463.8445272	99	0.19230769574642181
1612272494.9424388	100	0.23711340129375458
