# Supplementary material
Source: ML conference proceedings conference paper supplement (https://proceedings.mlr.press/v139/rahman21a.html)
Supplement: Supplementary file 3 [file rahman21a-supp.zip › ICMLSupportingDoc 2/Visualization/OpenShootingAccuracy/GNN-AM/run-tmnwxmdfwv-tag-Shooting_train_accuracy.csv]

Wall time	Step	Value
1612272519.6294737	0	0.01797385700047016
1612272538.5918376	1	0.017941050231456757
1612272559.3849835	2	0.0181818176060915
1612272575.606389	3	0.012594458647072315
1612272596.5551999	4	0.020083103328943253
1612272615.0811522	5	0.03341103345155716
1612272631.2829542	6	0.023794997483491898
1612272653.4795902	7	0.03627504035830498
1612272670.0278642	8	0.011363636702299118
1612272690.9871047	9	0.03043968416750431
1612272708.494896	10	0.02345309406518936
1612272728.2953503	11	0.023508137091994286
1612272751.846844	12	0.043893128633499146
1612272774.9343278	13	0.019313305616378784
1612272796.769884	14	0.01828681491315365
1612272815.4635544	15	0.01568627543747425
1612272837.8968432	16	0.031496062874794006
1612272860.4552305	17	0.0416666679084301
1612272880.9374769	18	0.019108280539512634
1612272903.023869	19	0.014814814552664757
1612272920.3532648	20	0.024000000208616257
1612272937.6968627	21	0.061302680522203445
1612272956.5850422	22	0.03999999910593033
1612272982.0885923	23	0.030470913276076317
1612273005.0270154	24	0.018691588193178177
1612273025.148239	25	0.02425876073539257
1612273046.3848639	26	0.012269938364624977
1612273074.3603623	27	0.04359672963619232
1612273095.573066	28	0.030651340261101723
1612273118.2862697	29	0.0390625
1612273136.1854506	30	0.04545454680919647
1612273161.65818	31	0.04477611929178238
1612273185.4837987	32	0.022086823359131813
1612273211.3229995	33	0.06213017925620079
1612273232.477641	34	0.035422343760728836
1612273257.1399028	35	0.07608695328235626
1612273288.6217203	36	0.048632219433784485
1612273317.0591302	37	0.07383966445922852
1612273342.2099776	38	0.03999999910593033
1612273357.1439023	39	0.054054055362939835
1612273377.9916224	40	0.04516129195690155
1612273394.794739	41	0.1111111119389534
1612273415.1179252	42	0.03381642326712608
1612273438.3616097	43	0.08041957765817642
1612273466.3749943	44	0.12835821509361267
1612273482.8832757	45	0.10162601619958878
1612273506.8952322	46	0.08759123831987381
1612273527.6584084	47	0.18633539974689484
1612273552.3067284	48	0.0565149150788784
1612273575.728232	49	0.15807560086250305
1612273599.5120778	50	0.25641027092933655
1612273611.513665	51	0.08571428805589676
1612273630.2972822	52	0.20247933268547058
1612273655.182017	53	0.24215246737003326
1612273680.906703	54	0.1428571492433548
1612273706.1671698	55	0.1505376398563385
1612273732.0468318	56	0.058425065129995346
1612273759.000805	57	0.15502183139324188
1612273782.519718	58	0.16034986078739166
1612273803.6093986	59	0.23188406229019165
1612273830.4641793	60	0.20749279856681824
1612273853.1917865	61	0.17748917639255524
1612273878.2426443	62	0.12756597995758057
1612273899.7222357	63	0.0959692895412445
1612273926.947132	64	0.1896207630634308
1612273958.6617198	65	0.21875
1612273985.6403358	66	0.17499999701976776
1612274009.9536304	67	0.2513088881969452
1612274038.485515	68	0.1746031790971756
1612274064.9200783	69	0.13813228905200958
1612274085.48768	70	0.16470588743686676
1612274111.463429	71	0.16524216532707214
1612274137.1565366	72	0.19692307710647583
1612274166.5596268	73	0.1736263781785965
1612274188.5495517	74	0.22807016968727112
1612274217.202707	75	0.13035382330417633
1612274248.363728	76	0.1850220263004303
1612274279.2884316	77	0.18481847643852234
1612274311.0906904	78	0.16304348409175873
1612274339.0664074	79	0.1538461595773697
1612274364.1583705	80	0.19062499701976776
1612274395.8233411	81	0.16363635659217834
1612274423.6133962	82	0.2881944477558136
1612274452.5123734	83	0.16101695597171783
1612274471.247905	84	0.1130952388048172
1612274500.6026776	85	0.16618910431861877
1612274531.5068595	86	0.13513512909412384
1612274558.9090583	87	0.1783919632434845
1612274581.9639783	88	0.08278866857290268
1612274607.2844374	89	0.23035229742527008
1612274632.2123075	90	0.19090908765792847
1612274667.6534436	91	0.13260529935359955
1612274699.7630813	92	0.22197802364826202
1612274723.8714716	93	0.07422680407762527
1612274749.963274	94	0.171171173453331
1612274779.512195	95	0.11783439666032791
1612274810.118863	96	0.1535508632659912
1612274826.9976728	97	0.2638888955116272
1612274858.4119139	98	0.1498054414987564
1612274887.4572864	99	0.07875894755125046
1612274915.4417455	100	0.14782609045505524
