# Supplementary material
Source: ML conference proceedings conference paper supplement (https://proceedings.mlr.press/v139/rahman21a.html)
Supplement: Supplementary file 3 [file rahman21a-supp.zip › ICMLSupportingDoc 2/Visualization/OpenShootingAccuracy/GNN-AM/run-ulcpziomis-tag-Shooting_train_accuracy.csv]

Wall time	Step	Value
1612274944.8245604	0	0.01536312885582447
1612274962.8534994	1	0.017779912799596786
1612274987.016079	2	0.02684563770890236
1612275007.5951483	3	0.019962860271334648
1612275030.1742113	4	0.025925925001502037
1612275050.2438803	5	0.021643558517098427
1612275066.229093	6	0.032786883413791656
1612275092.1673365	7	0.018397852778434753
1612275115.5228922	8	0.018858561292290688
1612275141.083894	9	0.03440702706575394
1612275160.8034132	10	0.03293084353208542
1612275188.9417324	11	0.024410774931311607
1612275207.4653282	12	0.0347222238779068
1612275227.3527756	13	0.06402438879013062
1612275253.130627	14	0.04535637050867081
1612275271.0991225	15	0.030136985704302788
1612275288.0973625	16	0.019417475908994675
1612275307.9049218	17	0.036363635212183
1612275325.925146	18	0.027450980618596077
1612275348.91327	19	0.021834060549736023
1612275370.789829	20	0.03750000149011612
1612275390.0430958	21	0.03353658691048622
1612275409.5826106	22	0.03343465179204941
1612275435.1022756	23	0.016897082328796387
1612275459.7352326	24	0.040462426841259
1612275485.9502912	25	0.0731707289814949
1612275506.1310017	26	0.10476190596818924
1612275534.4052074	27	0.062240663915872574
1612275556.3611274	28	0.04325699806213379
1612275580.9695468	29	0.04979253187775612
1612275609.697312	30	0.08490566164255142
1612275635.4158795	31	0.05588235333561897
1612275655.3629696	32	0.017636684700846672
1612275680.8842309	33	0.0714285746216774
1612275704.7170165	34	0.04485488310456276
1612275719.3144803	35	0.05298013240098953
1612275741.597511	36	0.06034482643008232
1612275771.5170116	37	0.0200803205370903
1612275796.830513	38	0.07382550090551376
1612275821.4433212	39	0.08045977354049683
1612275851.909065	40	0.14935064315795898
1612275873.207107	41	0.057553958147764206
1612275896.4497116	42	0.10139165073633194
1612275931.8203175	43	0.03664921596646309
1612275955.5352733	44	0.04096045345067978
1612275983.408958	45	0.20606060326099396
1612276007.0494153	46	0.08962263911962509
1612276026.2858567	47	0.05345211550593376
1612276061.4672842	48	0.08587786555290222
1612276092.4287148	49	0.13333334028720856
1612276117.8124442	50	0.0469798669219017
1612276141.7389767	51	0.08610567450523376
1612276172.3656049	52	0.12467532604932785
1612276207.9694488	53	0.11138613522052765
1612276229.6047678	54	0.09009008854627609
1612276255.8314545	55	0.10218977928161621
1612276281.3083792	56	0.13026052713394165
1612276308.1216943	57	0.09530387073755264
1612276335.1808596	58	0.17329545319080353
1612276356.8465006	59	0.1335504949092865
1612276380.4323184	60	0.18861210346221924
1612276409.1415832	61	0.27586206793785095
1612276436.814482	62	0.21188630163669586
1612276463.927773	63	0.19305019080638885
1612276487.2694137	64	0.14163090288639069
1612276519.3375628	65	0.14754098653793335
1612276548.3850968	66	0.17977528274059296
1612276566.1996255	67	0.1031746044754982
1612276587.52364	68	0.21474358439445496
1612276605.7889068	69	0.17525772750377655
1612276633.0254061	70	0.23589743673801422
1612276656.8552344	71	0.17231638729572296
1612276676.2372527	72	0.16959063708782196
1612276695.2772899	73	0.1189655140042305
1612276716.0765748	74	0.20338982343673706
1612276738.8338325	75	0.1794871836900711
1612276758.8044279	76	0.15367965400218964
1612276783.4550474	77	0.17578125
1612276803.7741961	78	0.22685185074806213
1612276819.4695053	79	0.3086419701576233
1612276841.2177114	80	0.11294117569923401
1612276861.8042173	81	0.19384615123271942
1612276881.182545	82	0.10594315081834793
1612276905.111968	83	0.20958083868026733
1612276920.1888072	84	0.19230769574642181
1612276936.6340814	85	0.3125
1612276958.444814	86	0.16698291897773743
1612276973.73995	87	0.1394849717617035
1612276989.1709309	88	0.2434210479259491
1612277011.3749714	89	0.1906614750623703
1612277032.5482192	90	0.1894736886024475
1612277054.6286457	91	0.20588235557079315
1612277075.279467	92	0.21271929144859314
1612277096.5080726	93	0.2450704276561737
1612277117.0573444	94	0.2298850566148758
1612277139.2958095	95	0.15620437264442444
1612277164.846688	96	0.23627685010433197
1612277185.032421	97	0.16790123283863068
1612277209.8844483	98	0.3151041567325592
1612277233.0263224	99	0.22812500596046448
1612277251.873138	100	0.20771513879299164
