# Supplementary material
Source: ML conference proceedings conference paper supplement (https://proceedings.mlr.press/v139/rahman21a.html)
Supplement: Supplementary file 3 [file rahman21a-supp.zip › ICMLSupportingDoc 2/Visualization/OpenShootingAccuracy/GNN-AM/run-xhnyxflvwp-tag-Shooting_train_accuracy.csv]

Wall time	Step	Value
1612277270.7728455	0	nan
1612277287.7887526	1	0.015597919933497906
1612277307.285322	2	0.01343570090830326
1612277321.6954799	3	0.014653640799224377
1612277339.0495718	4	0.012035583145916462
1612277357.3523247	5	0.01827160455286503
1612277372.304229	6	0.02179598994553089
1612277387.9348226	7	0.019538188353180885
1612277403.2306397	8	0.015113350003957748
1612277421.474567	9	0.021571649238467216
1612277440.0916812	10	0.03691275045275688
1612277456.5265508	11	0.016708437353372574
1612277472.506246	12	0.022757697850465775
1612277491.9954588	13	0.011170213110744953
1612277511.3500006	14	0.048128340393304825
1612277528.9447947	15	0.015238095074892044
1612277543.26583	16	0.05095541477203369
1612277561.686926	17	0.05726872384548187
1612277580.9708421	18	0.032608695328235626
1612277600.1981838	19	0.04693140834569931
1612277613.978147	20	0.031141867861151695
1612277632.1112716	21	0.07114624232053757
1612277651.0926852	22	0.06201550364494324
1612277665.7208242	23	0.05622490122914314
1612277687.3616412	24	0.03903903812170029
1612277707.1600537	25	0.05304518714547157
1612277732.4445968	26	0.04576271027326584
1612277746.9005666	27	0.06844106316566467
1612277763.8556814	28	0.029739776626229286
1612277778.7889953	29	0.05423728749155998
1612277796.7911272	30	0.049682874232530594
1612277815.494355	31	0.071129709482193
1612277832.862549	32	0.0441988967359066
1612277850.3336704	33	0.040145985782146454
1612277865.1238508	34	0.01752021536231041
1612277885.615322	35	0.04318181797862053
1612277905.2914407	36	0.061032865196466446
1612277927.671252	37	0.03837719187140465
1612277947.076617	38	0.0656108632683754
1612277963.3957872	39	0.11320754885673523
1612277980.5284896	40	0.10270269960165024
1612278000.1712842	41	0.048076923936605453
1612278018.3054752	42	0.034220531582832336
1612278035.1451323	43	0.04973822087049484
1612278055.6953275	44	0.07786884903907776
1612278075.686739	45	0.08360128849744797
1612278096.8279543	46	0.05916030704975128
1612278116.5498717	47	0.1287553608417511
1612278138.019997	48	0.170634925365448
1612278166.2352765	49	0.14825581014156342
1612278187.776557	50	0.13827160000801086
1612278210.5451243	51	0.18965516984462738
1612278226.0989602	52	0.10373444110155106
1612278247.1408014	53	0.09915611892938614
1612278271.9116964	54	0.09890110045671463
1612278290.5586977	55	0.17177914083003998
1612278312.4767096	56	0.16981132328510284
1612278335.2126184	57	0.1820809245109558
1612278355.364473	58	0.21232876181602478
1612278379.615616	59	0.30603447556495667
1612278403.544197	60	0.20270270109176636
1612278424.2614706	61	0.18994413316249847
1612278443.6764424	62	0.10245901346206665
1612278470.9989948	63	0.20273973047733307
1612278493.9671352	64	0.1982758641242981
1612278514.2134075	65	0.2646048069000244
1612278540.649736	66	0.22101449966430664
1612278568.096011	67	0.12678571045398712
1612278587.197511	68	0.12394366413354874
1612278604.250433	69	0.20212766528129578
1612278628.3004699	70	0.2245989292860031
1612278646.685958	71	0.1560283750295639
1612278666.2653415	72	0.12158054858446121
1612278681.1159077	73	0.1256544440984726
1612278702.9416354	74	0.17037037014961243
1612278722.3855016	75	0.18413597345352173
1612278744.08142	76	0.125
1612278758.2245114	77	0.12151066958904266
1612278779.276779	78	0.19064125418663025
1612278797.6818435	79	0.18895965814590454
1612278820.6339912	80	0.19578947126865387
1612278843.0399127	81	0.2641509473323822
1612278867.1351807	82	0.17268040776252747
1612278894.333959	83	0.19494584202766418
1612278920.1193972	84	0.18834081292152405
1612278942.8445814	85	0.2401847541332245
1612278968.147643	86	0.2513088881969452
1612278994.3612368	87	0.24169184267520905
1612279021.3389308	88	0.29516538977622986
1612279045.6293044	89	0.16078431904315948
1612279070.2580001	90	0.15976330637931824
1612279091.7206328	91	0.20000000298023224
1612279117.9297636	92	0.17159762978553772
1612279134.849387	93	0.17204301059246063
1612279156.102994	94	0.16030533611774445
1612279176.020212	95	0.1979166716337204
1612279199.15102	96	0.15068493783473969
1612279224.8705244	97	0.17138364911079407
1612279250.8591237	98	0.1964285671710968
1612279269.6847417	99	0.18731988966464996
1612279293.7096643	100	0.23274162411689758
