# Supplementary material
Source: ML conference proceedings conference paper supplement (https://proceedings.mlr.press/v139/rahman21a.html)
Supplement: Supplementary file 3 [file rahman21a-supp.zip › ICMLSupportingDoc 2/Visualization/OpenShootingAccuracy/GNN-AM/run-xxaligvdjb-tag-Shooting_train_accuracy.csv]

Wall time	Step	Value
1612279307.719458	0	0.0
1612279325.464414	1	0.0357142873108387
1612279343.19997	2	0.0181818176060915
1612279358.1671813	3	0.017639903351664543
1612279373.271981	4	0.02876869961619377
1612279390.8473608	5	0.016811279579997063
1612279407.1335337	6	0.013186813332140446
1612279420.7417223	7	0.01710730977356434
1612279437.7769616	8	0.017751479521393776
1612279456.3692358	9	0.011664899066090584
1612279471.5598292	10	0.009068425744771957
1612279492.0429118	11	0.021008403971791267
1612279504.7651057	12	0.03865979239344597
1612279522.288433	13	0.02994011901319027
1612279539.5468907	14	0.024725275114178658
1612279558.1943414	15	0.018789144232869148
1612279575.9682937	16	0.0150602413341403
1612279595.0220356	17	0.019933555275201797
1612279609.4824202	18	0.034246575087308884
1612279624.299012	19	0.025139665231108665
1612279640.6379802	20	0.019305018708109856
1612279660.1208344	21	0.03485838696360588
1612279676.6862366	22	0.04651162773370743
1612279688.1462297	23	0.041198503226041794
1612279703.3997679	24	0.0301204826682806
1612279721.1923993	25	0.04260651767253876
1612279741.8293664	26	0.03921568766236305
1612279759.7351224	27	0.048158641904592514
1612279776.5402427	28	0.028657617047429085
1612279795.9478543	29	0.03530895337462425
1612279816.9936018	30	0.033885542303323746
1612279832.5681357	31	0.05545617267489433
1612279852.349494	32	0.07717041671276093
1612279872.994259	33	0.04184100404381752
1612279889.5159578	34	0.08381503075361252
1612279908.9962249	35	0.08602150529623032
1612279932.9095695	36	0.07165109366178513
1612279958.0021546	37	0.10631228983402252
1612279981.786787	38	0.13483145833015442
1612279999.4416428	39	0.07289719581604004
1612280018.1726725	40	0.07446808367967606
1612280041.160747	41	0.08353222161531448
1612280066.2678037	42	0.07181328535079956
1612280085.3102393	43	0.10386473685503006
1612280101.5172377	44	0.08552631735801697
1612280125.1420684	45	0.0753655806183815
1612280146.2098348	46	0.1742919385433197
1612280166.0142114	47	0.1462264209985733
1612280182.7322438	48	0.06474819779396057
1612280201.3700912	49	0.19578947126865387
1612280217.6018422	50	0.17322835326194763
1612280238.8986106	51	0.18888889253139496
1612280257.6013114	52	0.26923078298568726
1612280272.053184	53	0.09939759224653244
1612280292.7140396	54	0.20849420130252838
1612280314.56612	55	0.32900431752204895
1612280331.0940886	56	0.2227722704410553
1612280350.7805812	57	0.17270195484161377
1612280368.4749753	58	0.18019801378250122
1612280390.6502042	59	0.30000001192092896
1612280408.4063108	60	0.23674911260604858
1612280420.3222187	61	0.24064171314239502
1612280440.842715	62	0.21715818345546722
1612280464.7220569	63	0.23113207519054413
1612280487.104703	64	0.20459289848804474
1612280502.930765	65	0.07717041671276093
1612280522.8253384	66	0.2078239619731903
1612280545.7268302	67	0.23220974206924438
1612280560.86056	68	0.3378378450870514
1612280581.7574108	69	0.18766756355762482
1612280599.7602496	70	0.22972972691059113
1612280619.7912679	71	0.17468805611133575
1612280643.8908541	72	0.24415583908557892
1612280665.8168716	73	0.11740042269229889
1612280686.2406437	74	0.24916943907737732
1612280709.80903	75	0.17862838506698608
1612280728.2457209	76	0.19718310236930847
1612280748.0868654	77	0.2825484871864319
1612280775.3249574	78	0.27906978130340576
1612280797.3417525	79	0.12684988975524902
1612280817.3503177	80	0.18352940678596497
1612280839.034506	81	0.3202614486217499
1612280866.1483989	82	0.16044776141643524
1612280886.6573906	83	0.1818181872367859
1612280908.7925382	84	0.1894736886024475
1612280933.9857965	85	0.23157894611358643
1612280952.675706	86	0.2099737524986267
1612280977.4489152	87	0.2026800662279129
1612281001.94182	88	0.18571428954601288
1612281019.6616015	89	0.18367347121238708
1612281042.432321	90	0.2284172624349594
1612281066.6625106	91	0.16120906174182892
1612281086.0492747	92	0.16432584822177887
1612281105.5704377	93	0.21256038546562195
1612281125.0711193	94	0.18398268520832062
1612281150.0908139	95	0.13221757113933563
1612281176.0515916	96	0.19718310236930847
1612281191.0819116	97	0.16507937014102936
1612281211.8616402	98	0.3298097252845764
1612281230.5022871	99	0.17014925181865692
1612281251.263118	100	0.22930800914764404
