# Supplementary material
Source: ML conference proceedings conference paper supplement (https://proceedings.mlr.press/v139/rahman21a.html)
Supplement: Supplementary file 3 [file rahman21a-supp.zip › ICMLSupportingDoc 2/Visualization/OpenShootingAccuracy/GNN/run-mlgbmswohu-tag-Shooting_train_accuracy.csv]

Wall time	Step	Value
1612271785.125425	0	0.0
1612271802.822677	1	0.04123711213469505
1612271821.983194	2	0.04575163498520851
1612271837.3073316	3	0.01840490847826004
1612271858.2402837	4	0.019204389303922653
1612271876.363295	5	0.05351682007312775
1612271899.9654968	6	0.0426621176302433
1612271917.233632	7	0.03579418361186981
1612271934.0454	8	0.03290129452943802
1612271951.3996139	9	0.03441682457923889
1612271970.263413	10	0.03241650387644768
1612271986.124833	11	0.02110389620065689
1612272003.1343086	12	0.01634877361357212
1612272019.914666	13	0.04084967449307442
1612272038.7536106	14	0.033175356686115265
1612272060.6277723	15	0.023992322385311127
1612272080.6683724	16	0.021367521956562996
1612272095.2874749	17	0.028288543224334717
1612272116.833762	18	0.036363635212183
1612272137.6241117	19	0.017208412289619446
1612272154.9546027	20	0.02181818149983883
1612272172.8946185	21	0.026234567165374756
1612272194.2466753	22	0.02469135820865631
1612272210.7116494	23	0.027272727340459824
1612272231.319292	24	0.051428571343421936
1612272256.8287425	25	0.04271356761455536
1612272274.3651464	26	0.07277628034353256
1612272295.3318975	27	0.037425149232149124
1612272315.6793768	28	0.05714285746216774
1612272336.7748191	29	0.021877849474549294
1612272358.2306712	30	0.052013423293828964
1612272379.794607	31	0.05714285746216774
1612272404.3853178	32	0.03837719187140465
1612272423.596711	33	0.05991735681891441
1612272448.5866497	34	0.059659089893102646
1612272472.8561065	35	0.0729166641831398
1612272500.7414758	36	0.05305466055870056
1612272517.5374963	37	0.057542767375707626
1612272541.7465081	38	0.06481481343507767
1612272566.5721242	39	0.051324501633644104
1612272585.8525043	40	0.06666667014360428
1612272605.5465238	41	0.07201309502124786
1612272624.5018568	42	0.04142692685127258
1612272649.8241384	43	0.06857142597436905
1612272676.3771827	44	0.07441860437393188
1612272702.2166724	45	0.0891089141368866
1612272720.6489913	46	0.11253196746110916
1612272738.1453273	47	0.08226221054792404
1612272763.7740386	48	0.12655086815357208
1612272780.586698	49	0.13364055752754211
1612272799.217846	50	0.05808080732822418
1612272818.2896738	51	0.09480812400579453
1612272844.0454075	52	0.11594203114509583
1612272876.0231917	53	0.1006355956196785
1612272900.5428782	54	0.08658743649721146
1612272929.243273	55	0.09185606241226196
1612272956.9616427	56	0.12651413679122925
1612272984.4153328	57	0.10904255509376526
1612273013.2252493	58	0.0811907947063446
1612273036.9635854	59	0.05128205195069313
1612273057.9068358	60	0.07239263504743576
1612273078.8237298	61	0.14444445073604584
1612273107.429016	62	0.12265758216381073
1612273123.1525242	63	0.1166306659579277
1612273144.4331489	64	0.10095012187957764
1612273166.5222654	65	0.07446808367967606
1612273183.4886425	66	0.09512761235237122
1612273204.9609828	67	0.13117870688438416
1612273224.9751306	68	0.1478102207183838
1612273242.4192903	69	0.11538461595773697
1612273266.1261692	70	0.222014918923378
1612273285.1279624	71	0.1597222238779068
1612273310.9097626	72	0.14369158446788788
1612273333.4150214	73	0.17150761187076569
1612273356.6265922	74	0.14301075041294098
1612273379.8262165	75	0.13644365966320038
1612273403.2310014	76	0.19866444170475006
1612273424.4124634	77	0.14837153255939484
1612273447.4538639	78	0.18870967626571655
1612273467.5141864	79	0.18627451360225677
1612273494.571215	80	0.1301301270723343
1612273522.7060301	81	0.1908046007156372
1612273547.6435697	82	0.17017383873462677
1612273568.708936	83	0.171171173453331
1612273592.0487216	84	0.20123839378356934
1612273617.284543	85	0.13787084817886353
1612273637.4225664	86	0.17287233471870422
1612273665.2114253	87	0.23510466516017914
1612273690.1702044	88	0.14145907759666443
1612273713.506203	89	0.14923076331615448
1612273743.5774615	90	0.17269906401634216
1612273764.1812477	91	0.1261160671710968
1612273789.6873357	92	0.12629161775112152
1612273813.9219098	93	0.16290131211280823
1612273837.4277267	94	0.13871635496616364
1612273860.1584008	95	0.15313653647899628
1612273889.3740044	96	0.13445378839969635
1612273918.189431	97	0.16171617805957794
1612273946.1398509	98	0.1523517370223999
1612273972.279077	99	0.16479820013046265
1612273995.9322135	100	0.1780821979045868
