# Supplementary material
Source: ML conference proceedings conference paper supplement (https://proceedings.mlr.press/v139/rahman21a.html)
Supplement: Supplementary file 3 [file rahman21a-supp.zip › ICMLSupportingDoc 2/Visualization/OpenShootingAccuracy/GNN/run-mlxrkfjbxy-tag-Shooting_train_accuracy.csv]

Wall time	Step	Value
1612274020.587834	0	0.0
1612274040.6036513	1	0.019396550953388214
1612274057.7519116	2	0.024390242993831635
1612274073.9135315	3	0.016393441706895828
1612274093.7537916	4	0.02087286487221718
1612274112.582964	5	0.025043681263923645
1612274133.4653454	6	0.028542304411530495
1612274154.7736435	7	0.035853467881679535
1612274176.1584702	8	0.02693089470267296
1612274194.251504	9	0.017391303554177284
1612274212.8050401	10	0.03030303120613098
1612274228.7060602	11	0.036222510039806366
1612274249.0653913	12	0.02619590051472187
1612274271.058933	13	0.030967742204666138
1612274291.7148778	14	0.016379309818148613
1612274315.297681	15	0.0236898772418499
1612274335.4812233	16	0.014986376278102398
1612274358.418218	17	0.04128440469503403
1612274382.9030938	18	0.030612245202064514
1612274405.6368327	19	0.022571148350834846
1612274425.8280897	20	0.052998606115579605
1612274440.9272738	21	0.03183024004101753
1612274459.0985827	22	0.030339805409312248
1612274476.149046	23	0.03142857179045677
1612274493.3431535	24	0.027004219591617584
1612274510.6652424	25	0.04657534137368202
1612274525.2446933	26	0.03502415493130684
1612274546.4099398	27	0.037859007716178894
1612274565.0088181	28	0.05365126579999924
1612274584.91507	29	0.03778135031461716
1612274603.3155558	30	0.05174825340509415
1612274627.328807	31	0.03532608598470688
1612274646.8481007	32	0.042817678302526474
1612274668.356116	33	0.07205240428447723
1612274691.300997	34	0.08843537420034409
1612274718.457861	35	0.06303419172763824
1612274742.525137	36	0.0538194440305233
1612274767.7060938	37	0.07973422110080719
1612274788.4737995	38	0.05667060241103172
1612274812.183424	39	0.0802631601691246
1612274837.2786663	40	0.05515003949403763
1612274864.0825188	41	0.09263959527015686
1612274885.5382664	42	0.10294117778539658
1612274911.5750108	43	0.06766054779291153
1612274928.53646	44	0.17142857611179352
1612274957.679578	45	0.10650069266557693
1612274985.2506914	46	0.09408033639192581
1612275008.725625	47	0.10668230056762695
1612275037.5418448	48	0.11974522471427917
1612275061.2737312	49	0.10247349739074707
1612275085.769947	50	0.1520223170518875
1612275105.7514834	51	0.13522537052631378
1612275127.263941	52	0.08356164395809174
1612275142.0717645	53	0.12114537507295609
1612275164.2849712	54	0.1495448648929596
1612275186.3219223	55	0.08416833728551865
1612275207.8650563	56	0.14212548732757568
1612275232.696196	57	0.11797752976417542
1612275251.075434	58	0.10627177357673645
1612275268.8602324	59	0.20396600663661957
1612275283.3874967	60	0.09817351400852203
1612275306.9164355	61	0.10520832985639572
1612275333.9858797	62	0.14325842261314392
1612275354.2229156	63	0.06997084617614746
1612275376.1849158	64	0.17276720702648163
1612275399.357691	65	0.13555991649627686
1612275420.7044716	66	0.14122137427330017
1612275444.058885	67	0.14331209659576416
1612275465.322139	68	0.16033755242824554
1612275492.562088	69	0.1461126059293747
1612275518.270634	70	0.1469135731458664
1612275542.8408816	71	0.12514758110046387
1612275572.422755	72	0.14940021932125092
1612275596.0873852	73	0.22020725905895233
1612275626.4197848	74	0.15733590722084045
1612275651.0742733	75	0.11515747755765915
1612275666.2596924	76	0.1632183939218521
1612275690.7845957	77	0.20792078971862793
1612275718.5066266	78	0.14827296137809753
1612275743.7671804	79	0.2128514051437378
1612275762.9167478	80	0.14671814441680908
1612275785.8111143	81	0.15915493667125702
1612275811.3074026	82	0.20136986672878265
1612275834.3718853	83	0.22075782716274261
1612275857.5584722	84	0.20683453977108002
1612275880.7582562	85	0.1307385265827179
1612275905.0951085	86	0.22051282227039337
1612275932.015438	87	0.2305045872926712
1612275947.0861619	88	0.1927512288093567
1612275971.8911474	89	0.21374045312404633
1612275999.7550342	90	0.18305084109306335
1612276025.830573	91	0.1866028755903244
1612276050.2265604	92	0.20958083868026733
1612276069.372624	93	0.16401590406894684
1612276096.320226	94	0.18705035746097565
1612276116.6882992	95	0.17446042597293854
1612276132.915567	96	0.014492753893136978
1612276151.5833654	97	0.13093833804130554
1612276168.5603378	98	0.11948640197515488
1612276187.952291	99	0.13080169260501862
1612276206.589578	100	0.14390243589878082
