# Supplementary material
Source: ML conference proceedings conference paper supplement (https://proceedings.mlr.press/v139/rahman21a.html)
Supplement: Supplementary file 3 [file rahman21a-supp.zip › ICMLSupportingDoc 2/Visualization/OpenShootingAccuracy/GNN/run-naeudyfitb-tag-Shooting_train_accuracy.csv]

Wall time	Step	Value
1612276223.0999103	0	0.0
1612276240.8382804	1	0.0243055559694767
1612276257.0686405	2	0.019034354016184807
1612276277.591607	3	0.020894428715109825
1612276297.518632	4	0.02258726954460144
1612276315.7211673	5	0.029439695179462433
1612276329.4353254	6	0.017660044133663177
1612276347.4993618	7	0.03252647444605827
1612276360.2128038	8	0.0317460335791111
1612276376.920591	9	0.02471042424440384
1612276395.190029	10	0.02330508455634117
1612276416.046672	11	0.036596521735191345
1612276437.7121484	12	0.03729838877916336
1612276454.743111	13	0.029904305934906006
1612276473.686983	14	0.021885521709918976
1612276492.1909056	15	0.015748031437397003
1612276515.4168944	16	0.03333333507180214
1612276531.129946	17	0.02459016442298889
1612276551.5884547	18	0.04601990059018135
1612276572.3382933	19	0.03303571417927742
1612276592.829342	20	0.03125
1612276612.3247561	21	0.056420233100652695
1612276629.253828	22	0.021568628028035164
1612276650.1756828	23	0.04153846204280853
1612276669.551601	24	0.03918918967247009
1612276691.8643324	25	0.04497751221060753
1612276714.3173604	26	0.019337017089128494
1612276735.2358744	27	0.02668539248406887
1612276755.8446577	28	0.026200873777270317
1612276773.2933195	29	0.0466531440615654
1612276795.2021885	30	0.04567699879407883
1612276817.4544084	31	0.057192374020814896
1612276835.4329307	32	0.0218722652643919
1612276856.6155307	33	0.05919003114104271
1612276881.0787132	34	0.054700855165719986
1612276900.8483057	35	0.0397351011633873
1612276920.6408389	36	0.06301369518041611
1612276943.6620436	37	0.10090361535549164
1612276970.852316	38	0.04430379718542099
1612276993.708302	39	0.06227106228470802
1612277018.1019504	40	0.06265060603618622
1612277041.5682704	41	0.08647798746824265
1612277075.5505636	42	0.06970509141683578
1612277097.6962063	43	0.049272116273641586
1612277124.2700746	44	0.10663507133722305
1612277153.1023386	45	0.1701323240995407
1612277178.460116	46	0.08047105371952057
1612277206.9860432	47	0.221374049782753
1612277231.4045343	48	0.1031746044754982
1612277251.4995983	49	0.17611940205097198
1612277275.582857	50	0.16049382090568542
1612277298.313103	51	0.10196078568696976
1612277323.1433287	52	0.25806450843811035
1612277350.5768445	53	0.13797634840011597
1612277375.188524	54	0.09170305728912354
1612277401.9035122	55	0.14449918270111084
1612277420.3868775	56	0.16915422677993774
1612277449.6879256	57	0.19148936867713928
1612277477.3260674	58	0.12160228937864304
1612277502.0554545	59	0.17692308127880096
1612277524.4148452	60	0.1399548500776291
1612277549.745151	61	0.1344902366399765
1612277576.466434	62	0.13154689967632294
1612277597.7630296	63	0.11234705150127411
1612277624.917051	64	0.1958174854516983
1612277650.2397225	65	0.15671642124652863
1612277668.7293453	66	0.23782235383987427
1612277693.3318677	67	0.1598062962293625
1612277712.6720705	68	0.1496437042951584
1612277736.0584676	69	0.13278008997440338
1612277758.140985	70	0.17416830360889435
1612277785.1143043	71	0.15279361605644226
1612277812.9339445	72	0.15985789895057678
1612277830.7718997	73	0.1477079838514328
1612277850.1379642	74	0.12670299410820007
1612277869.711368	75	0.18198874592781067
1612277896.1443236	76	0.21417565643787384
1612277919.0224109	77	0.1735241562128067
1612277934.9921536	78	0.19847328960895538
1612277955.935106	79	0.20257234573364258
1612277982.3257003	80	0.1981566846370697
1612278003.5881007	81	0.18367347121238708
1612278027.488252	82	0.23234623670578003
1612278050.5323303	83	0.1253369301557541
1612278072.9395125	84	0.21207864582538605
1612278100.0323265	85	0.21944443881511688
1612278126.0220242	86	0.18586386740207672
1612278151.503621	87	0.1825980395078659
1612278176.2950113	88	0.16032609343528748
1612278194.8085403	89	0.2007233202457428
1612278218.2066174	90	0.17146144807338715
1612278236.5934145	91	0.1582360565662384
1612278256.6370668	92	0.1786632388830185
1612278282.9078948	93	0.18916437029838562
1612278297.7296474	94	0.17534247040748596
1612278325.140675	95	0.1473684161901474
1612278345.242623	96	0.18551236391067505
1612278367.4548738	97	0.12057675391435623
1612278386.0472128	98	0.1473913061618805
1612278401.9900215	99	0.20863309502601624
1612278418.870846	100	0.14007781445980072
