# Supplementary material
Source: ML conference proceedings conference paper supplement (https://proceedings.mlr.press/v139/rahman21a.html)
Supplement: Supplementary file 3 [file rahman21a-supp.zip › ICMLSupportingDoc 2/Visualization/OpenShootingAccuracy/GNN/run-ofsjzqgtwm-tag-Shooting_train_accuracy.csv]

Wall time	Step	Value
1612278438.4484346	0	0.0
1612278453.9797592	1	0.0357142873108387
1612278465.9165988	2	0.023787740617990494
1612278480.6893816	3	0.024659311398863792
1612278497.3244164	4	0.017133956775069237
1612278513.1832411	5	0.009009009227156639
1612278529.8354728	6	0.02389078587293625
1612278546.059538	7	0.028169013559818268
1612278563.4085526	8	0.01944894716143608
1612278578.423104	9	0.03604531288146973
1612278592.3600867	10	0.02866242080926895
1612278614.3076167	11	0.015603799372911453
1612278632.8289945	12	0.018656715750694275
1612278649.565813	13	0.028523489832878113
1612278664.3771732	14	0.01766304299235344
1612278679.4447944	15	0.014827017672359943
1612278699.8278596	16	0.02263648435473442
1612278718.433813	17	0.03213610500097275
1612278739.1728518	18	0.03878116235136986
1612278758.4588835	19	0.019471488893032074
1612278774.06639	20	0.030263157561421394
1612278798.7736719	21	0.017391303554177284
1612278816.313808	22	0.010810811072587967
1612278837.0891047	23	0.02987861819565296
1612278860.1166234	24	0.05245901644229889
1612278879.256403	25	0.04907975345849991
1612278896.6883852	26	0.03475336357951164
1612278919.2892935	27	0.03746397793292999
1612278940.0525727	28	0.030518820509314537
1612278959.7280996	29	0.0515873022377491
1612278978.6581986	30	0.05635838210582733
1612278999.4674833	31	0.03791982680559158
1612279017.1486213	32	0.05629139021039009
1612279038.096059	33	0.05735930800437927
1612279058.8377707	34	0.04771371930837631
1612279078.4581382	35	0.060165975242853165
1612279103.2605453	36	0.05411764606833458
1612279123.4334524	37	0.04474708065390587
1612279144.5649524	38	0.04651162773370743
1612279165.0075655	39	0.043478261679410934
1612279190.0083659	40	0.04468085244297981
1612279209.281466	41	0.06419400870800018
1612279235.5860186	42	0.08866994827985764
1612279259.9091048	43	0.06770098954439163
1612279280.488531	44	0.05929487198591232
1612279305.531792	45	0.07633587718009949
1612279330.4754825	46	0.06507936865091324
1612279350.3572688	47	0.08408408612012863
1612279372.9741266	48	0.09006211161613464
1612279393.084923	49	0.09687499701976776
1612279412.792664	50	0.0907859057188034
1612279438.8210604	51	0.0868014246225357
1612279456.505354	52	0.06948640197515488
1612279469.9702525	53	0.06936416029930115
1612279487.2849514	54	0.12204007059335709
1612279510.3439713	55	0.08995327353477478
1612279532.9725428	56	0.12126865983009338
1612279557.88016	57	0.12684988975524902
1612279580.36966	58	0.12453531473875046
1612279604.9208462	59	0.12836438417434692
1612279628.913683	60	0.09745762497186661
1612279651.3542008	61	0.16231884062290192
1612279673.109979	62	0.08593012392520905
1612279697.516189	63	0.09429824352264404
1612279724.2587044	64	0.13476070761680603
1612279741.3947237	65	0.13457076251506805
1612279762.2361262	66	0.12195122241973877
1612279785.8504748	67	0.10398229956626892
1612279810.888688	68	0.07502374053001404
1612279831.1137187	69	0.1330472081899643
1612279853.237255	70	0.07199999690055847
1612279875.601077	71	0.11216429620981216
1612279893.70407	72	0.14511872828006744
1612279918.8300016	73	0.09615384787321091
1612279941.1964018	74	0.10798121988773346
1612279968.1324883	75	0.1532125174999237
1612279995.0416253	76	0.10962241142988205
1612280016.0550854	77	0.12965340912342072
1612280044.325559	78	0.19575856626033783
1612280068.53474	79	0.1696750968694687
1612280096.5705993	80	0.15451174974441528
1612280116.5106502	81	0.12355658411979675
1612280139.6006594	82	0.14102564752101898
1612280165.12322	83	0.1164383590221405
1612280194.1846316	84	0.11783439666032791
1612280219.137583	85	0.14692653715610504
1612280244.1605616	86	0.1342105269432068
1612280271.5713146	87	0.1818181872367859
1612280294.6864693	88	0.17348608374595642
1612280321.0950477	89	0.15354330837726593
1612280345.838917	90	0.17320702970027924
1612280373.143175	91	0.18363939225673676
1612280402.7971795	92	0.17134268581867218
1612280430.869642	93	0.15917843580245972
1612280459.0314531	94	0.19940915703773499
1612280483.155062	95	0.15843620896339417
1612280506.1987023	96	0.1538461595773697
1612280524.5629044	97	0.1428571492433548
1612280548.2727153	98	0.13802817016839981
1612280566.1545162	99	0.11744966357946396
1612280587.4044945	100	0.191268190741539
