# Supplementary material
Source: ML conference proceedings conference paper supplement (https://proceedings.mlr.press/v139/rahman21a.html)
Supplement: Supplementary file 3 [file rahman21a-supp.zip › ICMLSupportingDoc 2/Visualization/OpenShootingAccuracy/GNN/run-rqjimwpcct-tag-Shooting_train_accuracy.csv]

Wall time	Step	Value
1612280604.9531727	0	0.0
1612280621.581539	1	0.0
1612280635.6007855	2	0.05369127541780472
1612280652.2669728	3	0.024727992713451385
1612280673.8570058	4	0.019999999552965164
1612280694.5129907	5	0.026281209662556648
1612280716.1924872	6	0.026328619569540024
1612280734.8401732	7	0.030335862189531326
1612280753.2632358	8	0.020926756784319878
1612280774.9577088	9	0.013432836160063744
1612280788.7336934	10	0.008356546051800251
1612280808.551339	11	0.013598834164440632
1612280830.9615934	12	0.02861952781677246
1612280850.0762725	13	0.014533258974552155
1612280870.604111	14	0.029050279408693314
1612280888.526018	15	0.020497804507613182
1612280910.6576128	16	0.020365169271826744
1612280929.6135206	17	0.019200000911951065
1612280950.0658607	18	0.0203227736055851
1612280967.9610338	19	0.04496124014258385
1612280987.2993004	20	0.0276497695595026
1612281010.9743998	21	0.042288556694984436
1612281032.7370584	22	0.039051603525877
1612281052.5880263	23	0.03180914372205734
1612281074.634301	24	0.03252885490655899
1612281097.007193	25	0.04612546041607857
1612281113.6565948	26	0.04524886980652809
1612281133.6998065	27	0.05392912030220032
1612281153.1204746	28	0.0416666679084301
1612281170.4164014	29	0.04984423518180847
1612281189.4204204	30	0.04987834393978119
1612281207.4592624	31	0.062264151871204376
1612281222.7941825	32	0.06748466193675995
1612281243.5961182	33	0.059574469923973083
1612281259.763224	34	0.0590500645339489
1612281279.568203	35	0.06111111119389534
1612281303.4099636	36	0.06784386932849884
1612281326.292304	37	0.051995161920785904
1612281344.1398568	38	0.07575757801532745
1612281367.7569876	39	0.050662510097026825
1612281391.576177	40	0.0890125185251236
1612281407.680585	41	0.05597015097737312
1612281431.63376	42	0.10722100734710693
1612281458.826217	43	0.04918032884597778
1612281481.944049	44	0.054320987313985825
1612281506.1620758	45	0.12704917788505554
1612281536.0596802	46	0.1513761430978775
1612281560.7481961	47	0.10526315867900848
1612281589.3419502	48	0.06916996091604233
1612281608.941861	49	0.07581227272748947
1612281627.0519056	50	0.044763512909412384
1612281645.157142	51	0.10511363297700882
1612281664.2065766	52	0.07418397814035416
1612281691.4289975	53	0.08525034040212631
1612281711.4381762	54	0.08596300333738327
1612281729.3198457	55	0.06443514674901962
1612281755.0675669	56	0.09947089850902557
1612281782.9819586	57	0.10547944903373718
1612281801.6922734	58	0.13994169235229492
1612281829.0998456	59	0.10043041408061981
1612281849.229776	60	0.14778324961662292
1612281868.4592195	61	0.13490724563598633
1612281900.914068	62	0.12258797138929367
1612281924.0757263	63	0.12586446106433868
1612281948.7364352	64	0.11813842505216599
1612281979.0979269	65	0.12063953280448914
1612282005.9571118	66	0.11722689419984818
1612282028.061988	67	0.15734989941120148
1612282051.9272106	68	0.14020028710365295
1612282078.25648	69	0.17449665069580078
1612282110.3833504	70	0.17871759831905365
1612282136.9101148	71	0.17005544900894165
1612282165.8810272	72	0.13716813921928406
1612282191.189593	73	0.239130437374115
1612282215.1599803	74	0.1551312655210495
1612282235.7081435	75	0.08295964449644089
1612282259.4453638	76	0.14807692170143127
1612282287.4681947	77	0.16101695597171783
1612282311.2614782	78	0.125
1612282334.272258	79	0.17834395170211792
1612282361.602209	80	0.08624230325222015
1612282387.2658381	81	0.15265865623950958
1612282406.2169104	82	0.10898661613464355
1612282430.044216	83	0.17658349871635437
1612282449.651607	84	0.12399356067180634
1612282476.7093585	85	0.16081871092319489
1612282493.5740576	86	0.1194295883178711
1612282523.674213	87	0.13452380895614624
1612282550.767413	88	0.18222221732139587
1612282574.3288753	89	0.1922290325164795
1612282596.607734	90	0.16339869797229767
1612282618.6504948	91	0.13957935571670532
1612282645.2801654	92	0.19688108563423157
1612282672.5350869	93	0.14751772582530975
1612282694.0737793	94	0.19006478786468506
1612282720.2038362	95	0.16227461397647858
1612282744.5609994	96	0.13978494703769684
1612282765.1349535	97	0.10879377454519272
1612282781.7626455	98	0.13190311372280121
1612282804.7386339	99	0.11121457278728485
1612282824.9683247	100	0.12901408731937408
