# Supplementary material
Source: ML conference proceedings conference paper supplement (https://proceedings.mlr.press/v139/rahman21a.html)
Supplement: Supplementary file 3 [file rahman21a-supp.zip › ICMLSupportingDoc 2/Visualization/OpenShootingAccuracy/GNN/run-vjjzntwsiz-tag-Shooting_train_accuracy.csv]

Wall time	Step	Value
1612282845.2138104	0	0.017025088891386986
1612282861.6693635	1	0.017997751012444496
1612282878.661835	2	0.018696581944823265
1612282893.9775803	3	0.024539876729249954
1612282911.1202767	4	0.01412639394402504
1612282930.7310977	5	0.018769551068544388
1612282947.2216492	6	0.01603592000901699
1612282964.5597806	7	0.025621118023991585
1612282982.144655	8	0.03579175844788551
1612282996.0662396	9	0.04639175161719322
1612283011.4246655	10	0.03609625622630119
1612283028.5563474	11	0.040816325694322586
1612283043.0986516	12	0.03473227098584175
1612283063.9192362	13	0.041333332657814026
1612283080.7533488	14	0.032459426671266556
1612283104.1772127	15	0.03252032399177551
1612283120.0054553	16	0.026751592755317688
1612283135.734686	17	0.033088237047195435
1612283153.294171	18	0.034923337399959564
1612283170.9519846	19	0.01666666753590107
1612283190.0735023	20	0.04532163590192795
1612283205.9323707	21	0.03148425742983818
1612283222.6551964	22	0.030219780281186104
1612283238.5966678	23	0.025220680981874466
1612283255.7796037	24	0.04701397567987442
1612283273.8994887	25	0.037844035774469376
1612283296.2714665	26	0.040712468326091766
1612283316.3771503	27	0.03758654743432999
1612283337.9641128	28	0.0555555559694767
1612283357.1829133	29	0.06222865357995033
1612283378.1425645	30	0.06387225538492203
1612283401.0636299	31	0.06037735939025879
1612283423.4926896	32	0.09965035319328308
1612283443.2298286	33	0.07038123160600662
1612283467.1425865	34	0.0615384615957737
1612283492.9653366	35	0.06417112052440643
1612283519.7240748	36	0.07274320721626282
1612283542.6564045	37	0.12284483015537262
1612283558.4961548	38	0.0836431235074997
1612283579.8143966	39	0.07878787815570831
1612283602.8335857	40	0.11241217702627182
1612283627.9799387	41	0.07235421240329742
1612283650.741243	42	0.15071770548820496
1612283677.5363119	43	0.06724002957344055
1612283701.0937493	44	0.06285714358091354
1612283719.8367949	45	0.06270626932382584
1612283733.9213302	46	0.09736308455467224
1612283757.4993813	47	0.07609756290912628
1612283783.8202794	48	0.11406250298023224
1612283801.9284036	49	0.10312499850988388
1612283827.719043	50	0.11816839128732681
1612283845.9534214	51	0.031100478023290634
1612283865.2899954	52	0.1413276195526123
1612283885.664946	53	0.10391822457313538
1612283912.945051	54	0.10526315867900848
1612283934.1923277	55	0.12709030508995056
1612283952.832829	56	0.18666666746139526
1612283967.1021218	57	0.17004048824310303
1612283991.1432853	58	0.1351931393146515
1612284016.5149083	59	0.20498085021972656
1612284040.4915721	60	0.13161465525627136
1612284059.3806493	61	0.14075630903244019
1612284084.7281969	62	0.21064814925193787
1612284109.8027961	63	0.1972789168357849
1612284136.7805724	64	0.15189872682094574
1612284153.4253545	65	0.09948979318141937
1612284174.3776615	66	0.1471264362335205
1612284197.6474104	67	0.1144130751490593
1612284223.907731	68	0.13716813921928406
1612284239.4902368	69	0.09090909361839294
1612284262.5327458	70	0.15742793679237366
1612284284.3624907	71	0.08435207605361938
1612284304.9800825	72	0.1570248007774353
1612284326.7226212	73	0.11576011031866074
1612284348.102279	74	0.1402985006570816
1612284369.021371	75	0.13636364042758942
1612284386.448727	76	0.16089965403079987
1612284406.6414845	77	0.13525836169719696
1612284428.0241275	78	0.20578230917453766
1612284456.557481	79	0.17058824002742767
1612284479.9520354	80	0.18363939225673676
1612284501.112972	81	0.16312849521636963
1612284517.9342158	82	0.1741214096546173
1612284540.5393248	83	0.2560553550720215
1612284561.8622758	84	0.16917292773723602
1612284581.758854	85	0.10266940295696259
1612284598.2004108	86	0.20082814991474152
1612284625.795076	87	0.18365180492401123
1612284643.8461885	88	0.13430656492710114
1612284662.1433797	89	0.15313935279846191
1612284686.607687	90	0.1885913908481598
1612284704.1283054	91	0.10869564861059189
1612284722.8223484	92	0.15492957830429077
1612284748.7919958	93	0.1752677708864212
1612284769.1904294	94	0.1428571492433548
1612284795.4797251	95	0.15067079663276672
1612284810.085815	96	0.1487179547548294
1612284829.6164482	97	0.1217874425649643
1612284843.8918197	98	0.1111111119389534
1612284859.3323476	99	0.11739130318164825
1612284874.9624348	100	0.1350293606519699
