# Supplementary material
Source: ML conference proceedings conference paper supplement (https://proceedings.mlr.press/v139/rahman21a.html)
Supplement: Supplementary file 3 [file rahman21a-supp.zip › ICMLSupportingDoc 2/Visualization/OpenShootingAccuracy/GNN/run-xidnmtcxpe-tag-Shooting_train_accuracy.csv]

Wall time	Step	Value
1612284890.67589	0	0.014570551924407482
1612284906.7090797	1	0.010869565419852734
1612284923.8417907	2	0.021253405138850212
1612284942.070906	3	0.017928287386894226
1612284961.2598805	4	0.02235294133424759
1612284981.740822	5	0.03014642558991909
1612284997.6786528	6	0.02483285591006279
1612285016.943217	7	0.021901709958910942
1612285031.7114186	8	0.03402366861701012
1612285046.6180425	9	0.039024390280246735
1612285063.2480586	10	0.03642383962869644
1612285084.0468287	11	0.03405017778277397
1612285103.522854	12	0.026181818917393684
1612285117.4359133	13	0.03178206458687782
1612285134.108789	14	0.04356435686349869
1612285152.3254533	15	0.04700854793190956
1612285173.022174	16	0.027554534375667572
1612285194.4028943	17	0.01409244630485773
1612285212.7786772	18	0.022592151537537575
1612285234.501431	19	0.027054108679294586
1612285252.4786475	20	0.028846153989434242
1612285268.129184	21	0.05263157933950424
1612285287.8122842	22	0.04124748334288597
1612285311.4922667	23	0.043887145817279816
1612285333.3751087	24	0.0625
1612285347.6322033	25	0.05914972350001335
1612285368.3563714	26	0.041514042764902115
1612285384.0480955	27	0.05524861812591553
1612285405.7090397	28	0.07057057321071625
1612285426.618666	29	0.04230118542909622
1612285452.263653	30	0.05944798141717911
1612285473.4183428	31	0.047832585871219635
1612285494.7975667	32	0.058741260319948196
1612285522.5628293	33	0.05399325117468834
1612285543.2408144	34	0.08682634681463242
1612285565.8973763	35	0.08099173754453659
1612285586.2455664	36	0.09404388815164566
1612285608.5185742	37	0.14883720874786377
1612285627.8572206	38	0.06185567006468773
1612285655.2971513	39	0.058635395020246506
1612285675.3767889	40	0.08005427569150925
1612285701.2650094	41	0.07077326625585556
1612285726.8655844	42	0.0788954645395279
1612285748.1003082	43	0.03614457696676254
1612285773.0799127	44	0.10223641991615295
1612285795.235471	45	0.05009276419878006
1612285810.6906888	46	0.05816135182976723
1612285833.8294902	47	0.12938596308231354
1612285858.5389526	48	0.09371146559715271
1612285880.439833	49	0.0851769894361496
1612285903.916923	50	0.09646609425544739
1612285925.8174036	51	0.10051993280649185
1612285949.1235023	52	0.10186513513326645
1612285971.8264456	53	0.10055866092443466
1612285995.8450296	54	0.1256198287010193
1612286016.9251487	55	0.09008096903562546
1612286036.7311454	56	0.17616580426692963
1612286066.6670566	57	0.10341034084558487
1612286092.662449	58	0.08294931054115295
1612286112.677763	59	0.09430255740880966
1612286130.2898679	60	0.0936170220375061
1612286158.5853562	61	0.14696969091892242
1612286183.9545343	62	0.13053612411022186
1612286206.4501007	63	0.14558473229408264
1612286230.3717985	64	0.12967580556869507
1612286261.2695487	65	0.1367061287164688
1612286286.9764848	66	0.16323024034500122
1612286312.1370661	67	0.10287081450223923
1612286331.1484554	68	0.1939953863620758
1612286358.2935553	69	0.15025906264781952
1612286380.4489682	70	0.125490203499794
1612286401.2459297	71	0.2326732724905014
1612286427.5248191	72	0.10157367587089539
1612286457.0121083	73	0.15006820857524872
1612286485.095641	74	0.1396508663892746
1612286511.3786776	75	0.1773962825536728
1612286533.3535492	76	0.14722754061222076
1612286554.4743106	77	0.1179540678858757
1612286575.1989985	78	0.12527233362197876
1612286600.1435323	79	0.16178521513938904
1612286622.6347666	80	0.1644444465637207
1612286645.2579765	81	0.12343095988035202
1612286668.7918215	82	0.17339667677879333
1612286692.9272141	83	0.16022889316082
1612286714.8332021	84	0.15745393931865692
1612286737.1091902	85	0.13925570249557495
1612286759.559483	86	0.16493506729602814
1612286778.7891483	87	0.14921090006828308
1612286802.6083167	88	0.18593749403953552
1612286822.1675267	89	0.13855421543121338
1612286846.1109667	90	0.16764706373214722
1612286871.6275697	91	0.14669926464557648
1612286890.8064897	92	0.13829787075519562
1612286908.3326657	93	0.24213075637817383
1612286933.061132	94	0.19168901443481445
1612286958.0994937	95	0.22788605093955994
1612286976.0448174	96	0.11241217702627182
1612286999.8345835	97	0.12970149114727974
1612287014.8263326	98	0.1440880486369133
1612287030.1383278	99	0.11650485545396805
1612287044.008286	100	0.20676691830158234
