# Supplementary material
Source: ML conference proceedings conference paper supplement (https://proceedings.mlr.press/v139/rahman21a.html)
Supplement: Supplementary file 3 [file rahman21a-supp.zip › ICMLSupportingDoc 2/Visualization/OpenShootingAccuracy/GNN/run-zmsfzjkpje-tag-Shooting_train_accuracy.csv]

Wall time	Step	Value
1612287058.7284877	0	0.0
1612287077.2008586	1	0.011857707053422928
1612287092.738967	2	0.018483411520719528
1612287114.0253594	3	0.02411477454006672
1612287133.7673633	4	0.017213115468621254
1612287152.29393	5	0.030626781284809113
1612287171.6673808	6	0.01927194930613041
1612287188.2494786	7	0.05597015097737312
1612287206.3477118	8	0.043673012405633926
1612287225.7696464	9	0.022532189264893532
1612287245.3107612	10	0.046783626079559326
1612287263.967099	11	0.03663003817200661
1612287281.9808264	12	0.036346692591905594
1612287297.6261601	13	0.03912213817238808
1612287316.50574	14	0.023773005232214928
1612287335.8554654	15	0.032258063554763794
1612287354.5402265	16	0.02818991057574749
1612287375.2328005	17	0.02133580669760704
1612287394.75883	18	0.036906853318214417
1612287411.7838285	19	0.037530265748500824
1612287434.422961	20	0.024464832618832588
1612287451.6375873	21	0.030651340261101723
1612287470.9226227	22	0.07816711813211441
1612287489.098317	23	0.032426778227090836
1612287510.0105767	24	0.05128205195069313
1612287533.8441513	25	0.026678932830691338
1612287555.8922763	26	0.033707864582538605
1612287579.2889879	27	0.014398847706615925
1612287599.6693857	28	0.038167938590049744
1612287623.0384672	29	0.040909089148044586
1612287640.5921392	30	0.0294736847281456
1612287663.9357717	31	0.029523087665438652
1612287683.7856467	32	0.036319613456726074
1612287700.3660953	33	0.02368421107530594
1612287719.013848	34	0.041044775396585464
1612287737.6183596	35	0.046666666865348816
1612287757.299934	36	0.05482456088066101
1612287773.0443966	37	0.04280155524611473
1612287791.9624903	38	0.042432814836502075
1612287807.0643017	39	0.032626427710056305
1612287824.2191362	40	0.032608695328235626
1612287841.4333224	41	0.055956680327653885
1612287859.1421223	42	0.04679802805185318
1612287873.1701772	43	0.03726708143949509
1612287890.6608045	44	0.055187638849020004
1612287908.1698635	45	0.050986841320991516
1612287931.8199365	46	0.038402456790208817
1612287947.3834274	47	0.03432494401931763
1612287965.3647974	48	0.03696497902274132
1612287983.4761012	49	0.04038461670279503
1612288002.7179828	50	0.03651115670800209
1612288027.7360892	51	0.03865336626768112
1612288049.8631897	52	0.040622297674417496
1612288072.1073189	53	0.11682242900133133
1612288092.0774226	54	0.057644110172986984
1612288110.4584188	55	0.0677083358168602
1612288129.907332	56	0.06642942130565643
1612288148.7649462	57	0.09601181745529175
1612288166.8085701	58	0.08419688791036606
1612288186.842287	59	0.05978706106543541
1612288205.3225794	60	0.06902655214071274
1612288224.0795655	61	0.04423077031970024
1612288246.5459912	62	0.09650582075119019
1612288266.394686	63	0.08877284824848175
1612288285.678373	64	0.049766719341278076
1612288303.542599	65	0.15234375
1612288326.4437141	66	0.05384615436196327
1612288350.241863	67	0.09297912567853928
1612288369.9185576	68	0.10099337995052338
1612288390.8624518	69	0.06559766829013824
1612288413.0242946	70	0.08449073880910873
1612288432.4825838	71	0.10157367587089539
1612288456.6526017	72	0.14308175444602966
1612288483.026709	73	0.14897958934307098
1612288506.9225347	74	0.1451355665922165
1612288529.056532	75	0.12608695030212402
1612288551.7995625	76	0.09426751732826233
1612288575.011414	77	0.15051020681858063
1612288596.0356975	78	0.18952618539333344
1612288618.0890596	79	0.14378029108047485
1612288637.206705	80	0.11407407373189926
1612288658.6923523	81	0.1152542382478714
1612288684.0164618	82	0.1014799177646637
1612288704.304033	83	0.09882353246212006
1612288721.833212	84	0.09567617624998093
1612288739.550699	85	0.13991770148277283
1612288755.2776911	86	0.16923077404499054
1612288779.1703804	87	0.11552346497774124
1612288802.168273	88	0.1464226245880127
1612288819.385619	89	0.09829059988260269
1612288839.1241696	90	0.1371428519487381
1612288859.548752	91	0.13179348409175873
1612288879.9136236	92	0.10958904027938843
1612288903.055879	93	0.15469613671302795
1612288920.9292607	94	0.13642053306102753
1612288944.8072767	95	0.10817307978868484
1612288962.2288253	96	0.12630824506282806
1612288986.0327585	97	0.13088122516870499
1612289001.9161685	98	0.11518324911594391
1612289017.4074042	99	0.12406948208808899
1612289037.8529282	100	0.13169319927692413
