# Supplementary material
Source: ML conference proceedings conference paper supplement (https://proceedings.mlr.press/v139/rahman21a.html)
Supplement: Supplementary file 3 [file rahman21a-supp.zip › ICMLSupportingDoc 2/Visualization/OpenShootingAccuracy/GPL/run-annltlptcl-tag-Shooting_train_accuracy.csv]

Wall time	Step	Value
1612266837.6721454	0	0.0
1612266850.8014407	1	0.028985507786273956
1612266861.0980515	2	0.014729950577020645
1612266873.1528702	3	0.0199115052819252
1612266890.135784	4	0.0181818176060915
1612266904.4474432	5	0.016636958345770836
1612266918.1485858	6	0.03065825067460537
1612266936.081716	7	0.014012739062309265
1612266951.5576587	8	0.03202847018837929
1612266969.0214882	9	0.020652173087000847
1612266985.7758653	10	0.03459637612104416
1612267001.1103373	11	0.03381642326712608
1612267017.074549	12	0.03868471831083298
1612267030.5585585	13	0.04010695219039917
1612267045.8298202	14	0.03349282220005989
1612267059.3303783	15	0.0276497695595026
1612267074.2721334	16	0.029304029420018196
1612267089.4479237	17	0.02931596152484417
1612267105.0630605	18	0.0325581394135952
1612267120.4070299	19	0.0634920671582222
1612267139.5432174	20	0.05138339847326279
1612267159.252825	21	0.08274231851100922
1612267176.6750543	22	0.09774436056613922
1612267194.2385669	23	0.08403361588716507
1612267214.2531548	24	0.08620689809322357
1612267234.9216764	25	0.0892857164144516
1612267250.7104897	26	0.07692307978868484
1612267274.814543	27	0.19367589056491852
1612267290.6489553	28	0.10196779668331146
1612267310.352052	29	0.10053618997335434
1612267331.0788846	30	0.19767442345619202
1612267351.4570076	31	0.14328357577323914
1612267370.3401647	32	0.1764705926179886
1612267391.5502598	33	0.17820069193840027
1612267406.516506	34	0.10854092240333557
1612267425.00898	35	0.1473812460899353
1612267444.3752048	36	0.14800000190734863
1612267467.1200812	37	0.12775330245494843
1612267482.7247279	38	0.28278687596321106
1612267502.8691018	39	0.15903890132904053
1612267524.4327762	40	0.17596566677093506
1612267544.8675547	41	0.14592275023460388
1612267570.1132672	42	0.12244898080825806
1612267590.791952	43	0.12820513546466827
1612267614.5865698	44	0.25
1612267630.5756269	45	0.24271844327449799
1612267649.9088876	46	0.1812725067138672
1612267669.4346955	47	0.26547232270240784
1612267684.999447	48	0.3636363744735718
1612267703.5044155	49	0.21408045291900635
1612267722.0246933	50	0.2175438553094864
1612267742.2364779	51	0.20780712366104126
1612267760.8899338	52	0.20217730104923248
1612267782.8369405	53	0.24607330560684204
1612267797.9826176	54	0.30917873978614807
1612267820.798337	55	0.23831775784492493
1612267837.6222122	56	0.37542662024497986
1612267858.0586762	57	0.2685050666332245
1612267878.118435	58	0.32161685824394226
1612267898.4682105	59	0.3959183692932129
1612267923.1331897	60	0.15866796672344208
1612267943.9519289	61	0.3494736850261688
1612267961.8791072	62	0.2848101258277893
1612267986.539535	63	0.27860027551651
1612268005.8961415	64	0.20135746896266937
1612268025.0117188	65	0.42514970898628235
1612268044.2940724	66	0.3137930929660797
1612268061.8690486	67	0.17699114978313446
1612268082.39347	68	0.2677966058254242
1612268102.615429	69	0.26989078521728516
1612268126.2437418	70	0.38793104887008667
1612268146.6238358	71	0.29015544056892395
1612268170.6848288	72	0.12297540158033371
1612268191.100614	73	0.5933610200881958
1612268209.9280214	74	0.1460465043783188
1612268227.9122472	75	0.2965964376926422
1612268246.6035304	76	0.22689075767993927
1612268262.3267276	77	0.27886056900024414
1612268282.1996112	78	0.36567163467407227
1612268307.4470513	79	0.24347825348377228
1612268327.6479595	80	0.2796725928783417
1612268347.305911	81	0.4350649416446686
1612268368.4826248	82	0.2450980395078659
1612268388.2736647	83	0.33450087904930115
1612268409.191102	84	0.4134615361690521
1612268431.5411243	85	0.2886115312576294
1612268449.0026608	86	0.25999999046325684
1612268469.0381217	87	0.21773289144039154
1612268489.5846338	88	0.36082473397254944
1612268507.5152194	89	0.23763570189476013
1612268528.503105	90	0.2607913613319397
1612268548.7035456	91	0.410780668258667
1612268572.6927793	92	0.33218786120414734
1612268594.107736	93	0.19573400914669037
1612268616.0461788	94	0.349152535200119
1612268634.9958253	95	0.2742857038974762
1612268653.7174182	96	0.14743590354919434
1612268671.6349134	97	0.23105134069919586
1612268691.1639678	98	0.3408723771572113
1612268707.6701846	99	0.43917524814605713
1612268726.5016494	100	0.31282952427864075
