# Supplementary material
Source: ML conference proceedings conference paper supplement (https://proceedings.mlr.press/v139/rahman21a.html)
Supplement: Supplementary file 3 [file rahman21a-supp.zip › ICMLSupportingDoc 2/Visualization/OpenShootingAccuracy/GPL/run-baowkcwvgy-tag-Shooting_train_accuracy.csv]

Wall time	Step	Value
1612268740.6732335	0	0.0
1612268752.1736727	1	0.01666666753590107
1612268763.9979577	2	0.015037594363093376
1612268777.4923415	3	0.01598653756082058
1612268788.0605927	4	0.021561337634921074
1612268803.1268501	5	0.025507548823952675
1612268814.7869189	6	0.028537455946207047
1612268832.7027009	7	0.013852814212441444
1612268851.324094	8	0.0301339291036129
1612268866.0567665	9	0.017624521628022194
1612268880.5659378	10	0.022875817492604256
1612268897.696764	11	0.019639935344457626
1612268911.3189738	12	0.047445256263017654
1612268925.4782135	13	0.0357142873108387
1612268940.1573603	14	0.02780996449291706
1612268954.6208112	15	0.021739130839705467
1612268967.9228332	16	0.03396226465702057
1612268981.9530993	17	0.029629629105329514
1612268998.5028062	18	0.04651162773370743
1612269011.4895308	19	0.030927835032343864
1612269025.3529263	20	0.029895367100834846
1612269042.3750002	21	0.0476190485060215
1612269059.7855883	22	0.06711409240961075
1612269075.008481	23	0.017777778208255768
1612269089.052043	24	0.03126954287290573
1612269107.1937976	25	0.06392694264650345
1612269123.0404382	26	0.0456349216401577
1612269139.6151972	27	0.03684971109032631
1612269153.8791373	28	0.04776119440793991
1612269169.098096	29	0.055099647492170334
1612269186.9145195	30	0.06872037798166275
1612269200.1470873	31	0.11370262503623962
1612269218.6733766	32	0.08284883946180344
1612269235.698571	33	0.15990453958511353
1612269252.8595624	34	0.0665859580039978
1612269266.2794592	35	0.05819477513432503
1612269285.386266	36	0.1179245263338089
1612269306.6784482	37	0.1702127605676651
1612269329.5820324	38	0.1093544140458107
1612269345.6006165	39	0.09768977016210556
1612269363.6024466	40	0.18646864593029022
1612269386.0146906	41	0.11320754885673523
1612269407.3115466	42	0.16958041489124298
1612269421.461486	43	0.19696970283985138
1612269438.8359342	44	0.15417559444904327
1612269458.7104445	45	0.2072649598121643
1612269483.316901	46	0.15846538543701172
1612269504.718678	47	0.25330132246017456
1612269528.9511943	48	0.19494584202766418
1612269550.9998217	49	0.2811501622200012
1612269568.9656098	50	0.15744680166244507
1612269587.5785701	51	0.33193278312683105
1612269608.4144635	52	0.2579014003276825
1612269624.9787233	53	0.3333333432674408
1612269646.3026764	54	0.30527639389038086
1612269667.3785346	55	0.33829787373542786
1612269687.5364866	56	0.27515724301338196
1612269706.2138045	57	0.3679417073726654
1612269725.123871	58	0.3325062096118927
1612269752.6871989	59	0.15868262946605682
1612269771.9411504	60	0.1425313502550125
1612269793.089375	61	0.32081910967826843
1612269813.4874046	62	0.3367198705673218
1612269830.981043	63	0.46116504073143005
1612269858.176117	64	0.24530662596225739
1612269878.9544346	65	0.2494432032108307
1612269898.0878131	66	0.20679011940956116
1612269917.9817977	67	0.20618556439876556
1612269938.727828	68	0.4139784872531891
1612269964.0788145	69	0.19912151992321014
1612269980.0406506	70	0.32829374074935913
1612270004.9934258	71	0.24109014868736267
1612270027.8060205	72	0.2630302906036377
1612270048.0547636	73	0.44200000166893005
1612270069.4040098	74	0.15951742231845856
1612270088.149465	75	0.18029114603996277
1612270111.09182	76	0.3674321472644806
1612270129.9898825	77	0.28598129749298096
1612270150.5739043	78	0.2649199366569519
1612270167.4064293	79	0.21383647620677948
1612270189.8145342	80	0.38385501503944397
1612270209.1390364	81	0.16282764077186584
1612270229.8757718	82	0.31340205669403076
1612270247.2458408	83	0.34859153628349304
1612270272.8455014	84	0.4002770185470581
1612270300.3586287	85	0.4172099232673645
1612270322.918468	86	0.38632163405418396
1612270350.276476	87	0.35470086336135864
1612270369.560842	88	0.31376516819000244
1612270392.6681936	89	0.4183381199836731
1612270415.9631033	90	0.31098902225494385
1612270437.458205	91	0.29284903407096863
1612270459.716545	92	0.2877767086029053
1612270478.5187216	93	0.3926788568496704
1612270498.8988166	94	0.17037037014961243
1612270522.8725872	95	0.28093644976615906
1612270547.2468705	96	0.4120982885360718
1612270567.0611231	97	0.24407583475112915
1612270588.9787996	98	0.2514285743236542
1612270609.5937424	99	0.41384389996528625
1612270630.6065485	100	0.37251654267311096
