# Supplementary material
Source: ML conference proceedings conference paper supplement (https://proceedings.mlr.press/v139/rahman21a.html)
Supplement: Supplementary file 3 [file rahman21a-supp.zip › ICMLSupportingDoc 2/Visualization/OpenShootingAccuracy/GPL/run-ccngnbeaox-tag-Shooting_train_accuracy.csv]

Wall time	Step	Value
1612270644.5519257	0	0.0
1612270661.268675	1	0.034246575087308884
1612270677.6078415	2	0.02905982919037342
1612270696.1811361	3	0.01972789131104946
1612270714.4443152	4	0.024223603308200836
1612270733.092334	5	0.017142856493592262
1612270751.8993535	6	0.027486911043524742
1612270767.0305183	7	0.03917301446199417
1612270784.8768883	8	0.024420788511633873
1612270802.777312	9	0.019999999552965164
1612270820.1575603	10	0.01256281416863203
1612270835.6533263	11	0.01752767525613308
1612270846.954172	12	0.013114754110574722
1612270860.31768	13	0.031185030937194824
1612270877.264859	14	0.036020584404468536
1612270893.9827278	15	0.018597997725009918
1612270909.74066	16	0.0343213714659214
1612270924.4361002	17	0.05707762390375137
1612270947.470989	18	0.03669724613428116
1612270962.8976068	19	0.03474903479218483
1612270984.226389	20	0.05089820176362991
1612271003.5400438	21	0.030831098556518555
1612271017.0628362	22	0.05238095298409462
1612271033.7280655	23	0.06681034713983536
1612271047.1515553	24	0.14765100181102753
1612271067.487707	25	0.06065573915839195
1612271086.7798743	26	0.054901961237192154
1612271108.3549268	27	0.06009615212678909
1612271128.9531713	28	0.06889352947473526
1612271144.6318307	29	0.04422604292631149
1612271160.032958	30	0.13902439177036285
1612271180.1209538	31	0.11240310221910477
1612271202.4047637	32	0.07718120515346527
1612271221.770041	33	0.19480518996715546
1612271240.7471545	34	0.16896551847457886
1612271263.404366	35	0.09564164280891418
1612271282.0832403	36	0.09444444626569748
1612271301.283425	37	0.1196388229727745
1612271324.454106	38	0.0911475419998169
1612271347.2170675	39	0.19298245012760162
1612271364.2729535	40	0.23493975400924683
1612271384.7396922	41	0.15286624431610107
1612271406.2467551	42	0.1534954458475113
1612271422.3303902	43	0.15142856538295746
1612271438.9696894	44	0.24166665971279144
1612271456.776799	45	0.208695650100708
1612271477.278103	46	0.1995820254087448
1612271489.5414813	47	0.23918575048446655
1612271508.8764656	48	0.2955465614795685
1612271523.1516786	49	0.23974762856960297
1612271538.5634816	50	0.23493975400924683
1612271553.3305957	51	0.22513088583946228
1612271572.9316132	52	0.23425692319869995
1612271589.5643826	53	0.1724550873041153
1612271604.920704	54	0.36486485600471497
1612271620.4222054	55	0.23763570189476013
1612271633.261691	56	0.16765578091144562
1612271649.5960512	57	0.16923077404499054
1612271670.3349195	58	0.38879457116127014
1612271692.3526218	59	0.29742032289505005
1612271704.644487	60	0.17577196657657623
1612271718.882873	61	0.22575756907463074
1612271736.042433	62	0.3101736903190613
1612271755.8664737	63	0.3201506733894348
1612271776.299361	64	0.1892605572938919
1612271798.550455	65	0.17118997871875763
1612271816.1281712	66	0.3571428656578064
1612271829.2004771	67	0.3008298873901367
1612271847.6796186	68	0.37832310795783997
1612271863.3011732	69	0.23197491466999054
1612271888.2287889	70	0.16868197917938232
1612271906.0123057	71	0.30215826630592346
1612271929.0978746	72	0.27272728085517883
1612271942.709217	73	0.16074766218662262
1612271966.1468272	74	0.37685951590538025
1612271989.9415734	75	0.2119741141796112
1612272010.5276976	76	0.2711656391620636
1612272031.0640826	77	0.3421874940395355
1612272046.6846905	78	0.1929260492324829
1612272063.444363	79	0.34402331709861755
1612272084.7166686	80	0.29037800431251526
1612272098.922232	81	0.2321428507566452
1612272116.8357646	82	0.2694684863090515
1612272136.3324883	83	0.1453551948070526
1612272151.9741647	84	0.18714286386966705
1612272171.9347868	85	0.18730159103870392
1612272189.12675	86	0.2702127695083618
1612272206.397272	87	0.22437971830368042
1612272228.597344	88	0.23791469633579254
1612272250.2959805	89	0.21344716846942902
1612272269.6143515	90	0.21643835306167603
1612272289.895179	91	0.1923990547657013
1612272306.7568178	92	0.27017542719841003
1612272326.6580863	93	0.27099236845970154
1612272344.9488566	94	0.2594059407711029
1612272365.1099577	95	0.38200339674949646
1612272384.0123413	96	0.35687023401260376
1612272400.4625428	97	0.3418940603733063
1612272421.5169203	98	0.2124183028936386
1612272442.558756	99	0.4266917407512665
1612272460.736687	100	0.2697142958641052
