# Supplementary material
Source: ML conference proceedings conference paper supplement (https://proceedings.mlr.press/v139/rahman21a.html)
Supplement: Supplementary file 3 [file rahman21a-supp.zip › ICMLSupportingDoc 2/Visualization/OpenShootingAccuracy/GPL/run-ebngkvwdyu-tag-Shooting_train_accuracy.csv]

Wall time	Step	Value
1612272474.7067397	0	0.0
1612272486.6049428	1	0.03780718520283699
1612272501.4170332	2	0.024311183020472527
1612272518.721597	3	0.024561403319239616
1612272531.9086967	4	0.01935146376490593
1612272547.3857853	5	0.0054054055362939835
1612272563.0088308	6	0.014537902548909187
1612272578.5253868	7	0.007647058926522732
1612272592.788322	8	0.008456659503281116
1612272611.3515975	9	0.018539976328611374
1612272623.5592644	10	0.01948627084493637
1612272637.355736	11	0.016806723549962044
1612272650.08713	12	0.037974681705236435
1612272666.5709546	13	0.027314111590385437
1612272679.9082892	14	0.03846153989434242
1612272696.0885816	15	0.05714285746216774
1612272710.224945	16	0.050193049013614655
1612272721.130149	17	0.06849315017461777
1612272734.0342574	18	0.04203539714217186
1612272749.219473	19	0.0739549845457077
1612272767.7010186	20	0.04920914024114609
1612272789.208302	21	0.10478360205888748
1612272803.1533337	22	0.1405622512102127
1612272819.6177542	23	0.0881863534450531
1612272842.101655	24	0.05329153686761856
1612272859.45588	25	0.056689340621232986
1612272877.9466448	26	0.06509695202112198
1612272892.7170384	27	0.05929487198591232
1612272912.6642144	28	0.04609665274620056
1612272929.3531146	29	0.07484662532806396
1612272942.8886864	30	0.12328767031431198
1612272961.0169413	31	0.1498127281665802
1612272978.1684937	32	0.08135861158370972
1612272998.7144034	33	0.1523076891899109
1612273018.2138538	34	0.06853146851062775
1612273033.2171433	35	0.05175292119383812
1612273052.6267104	36	0.12939958274364471
1612273072.6624048	37	0.11332312226295471
1612273091.9847565	38	0.08575581759214401
1612273107.9890182	39	0.14656144380569458
1612273126.2810693	40	0.14605262875556946
1612273146.644697	41	0.16601307690143585
1612273159.6778908	42	0.197628453373909
1612273180.9865103	43	0.10308369994163513
1612273198.7934418	44	0.15366972982883453
1612273217.8660278	45	0.2101694941520691
1612273235.8105206	46	0.18148820102214813
1612273256.0375392	47	0.1552795022726059
1612273274.5517354	48	0.15049505233764648
1612273293.1629007	49	0.22649572789669037
1612273312.192692	50	0.31228071451187134
1612273333.171038	51	0.21755725145339966
1612273351.9903686	52	0.13118278980255127
1612273367.3719642	53	0.27729883790016174
1612273385.556579	54	0.1419508308172226
1612273405.3277502	55	0.29672130942344666
1612273425.826925	56	0.22359155118465424
1612273448.1320252	57	0.17743490636348724
1612273465.1836147	58	0.21266072988510132
1612273490.285162	59	0.23429951071739197
1612273511.929462	60	0.15138022601604462
1612273532.5718663	61	0.27973198890686035
1612273551.537081	62	0.33669355511665344
1612273569.770972	63	0.2517193853855133
1612273587.5072181	64	0.1003236249089241
1612273603.3487494	65	0.17828571796417236
1612273619.7200637	66	0.17732207477092743
1612273639.8986046	67	0.163886159658432
1612273662.646965	68	0.25623583793640137
1612273681.9765537	69	0.3304794430732727
1612273702.5146933	70	0.24623115360736847
1612273721.2125647	71	0.1844484657049179
1612273738.7865877	72	0.2911111116409302
1612273757.7884784	73	0.30320701003074646
1612273772.1415477	74	0.16764132678508759
1612273793.9134552	75	0.15753424167633057
1612273812.1152673	76	0.21086262166500092
1612273830.2015915	77	0.2028254270553589
1612273852.1605144	78	0.3449692130088806
1612273874.3776753	79	0.2601536810398102
1612273897.7492642	80	0.3882544934749603
1612273921.6757495	81	0.20608440041542053
1612273937.4873579	82	0.5050100088119507
1612273957.0490334	83	0.369523823261261
1612273975.9065287	84	0.15905383229255676
1612273994.3708305	85	0.2826603353023529
1612274010.2749603	86	0.37142857909202576
1612274030.549079	87	0.4860813617706299
1612274043.2415035	88	0.16163410246372223
1612274060.3525236	89	0.40594059228897095
1612274075.4950962	90	0.4066852331161499
1612274092.1787257	91	0.1993817687034607
1612274108.066429	92	0.4184914827346802
1612274123.6653924	93	0.3529411852359772
1612274139.2990766	94	0.244935542345047
1612274161.4696357	95	0.24078623950481415
1612274182.8150415	96	0.2728842794895172
1612274204.3325467	97	0.4752252399921417
1612274222.250446	98	0.3021032512187958
1612274242.3060224	99	0.27397260069847107
1612274256.0162282	100	0.2234848439693451
