# Supplementary material
Source: ML conference proceedings conference paper supplement (https://proceedings.mlr.press/v139/rahman21a.html)
Supplement: Supplementary file 3 [file rahman21a-supp.zip › ICMLSupportingDoc 2/Visualization/OpenShootingAccuracy/GPL/run-haasdoeuvi-tag-Shooting_train_accuracy.csv]

Wall time	Step	Value
1612274269.2749283	0	0.0
1612274282.5197544	1	0.0
1612274298.168024	2	0.025974025949835777
1612274313.8209996	3	0.014671361073851585
1612274324.6828172	4	0.01984408311545849
1612274337.5930166	5	0.026283618062734604
1612274351.1983728	6	0.01955990307033062
1612274366.044754	7	0.013409961946308613
1612274378.941697	8	0.029629629105329514
1612274390.9028854	9	0.025641025975346565
1612274403.842051	10	0.0386643223464489
1612274420.69821	11	0.026771653443574905
1612274434.7226987	12	0.02631578966975212
1612274450.075028	13	0.043478261679410934
1612274462.4044106	14	0.040584415197372437
1612274475.4143174	15	0.045186638832092285
1612274489.7655792	16	0.02961275540292263
1612274505.6834183	17	0.07692307978868484
1612274522.6848013	18	0.04428044334053993
1612274534.940139	19	0.06218905374407768
1612274546.6298673	20	0.039381153881549835
1612274562.0418544	21	0.0443490706384182
1612274580.241369	22	0.09146341681480408
1612274591.5809498	23	0.2158273309469223
1612274609.4862878	24	0.05376344174146652
1612274622.509695	25	0.1225806474685669
1612274637.8238246	26	0.15447154641151428
1612274656.0684128	27	0.13461539149284363
1612274669.9560642	28	0.09017713367938995
1612274680.0875626	29	0.14912280440330505
1612274694.8041143	30	0.11278195679187775
1612274706.890346	31	0.16809116303920746
1612274722.917523	32	0.15181517601013184
1612274740.2447584	33	0.08542713522911072
1612274758.547601	34	0.20072992146015167
1612274771.4976878	35	0.24242424964904785
1612274788.1501818	36	0.19890260696411133
1612274807.7677271	37	0.11570248007774353
1612274824.2933376	38	0.08488063514232635
1612274840.0045016	39	0.16398243606090546
1612274857.144299	40	0.12380952388048172
1612274872.342142	41	0.22990654408931732
1612274890.0112321	42	0.207880437374115
1612274912.5832841	43	0.16868798434734344
1612274928.8427598	44	0.2668810188770294
1612274945.0885742	45	0.2552011013031006
1612274964.466672	46	0.15235456824302673
1612274976.6252766	47	0.19029851257801056
1612274995.1893923	48	0.22335025668144226
1612275009.364953	49	0.30510950088500977
1612275025.6854408	50	0.26110363006591797
1612275035.4497657	51	0.30588236451148987
1612275044.6906583	52	0.20212766528129578
1612275064.9438372	53	0.2943677008152008
1612275077.7474582	54	0.2306368350982666
1612275091.0661204	55	0.3460620641708374
1612275110.384312	56	0.24598930776119232
1612275127.3591166	57	0.3294573724269867
1612275142.6434968	58	0.3316062092781067
1612275159.8611016	59	0.17499999701976776
1612275173.55063	60	0.2529032230377197
1612275193.1635816	61	0.37142857909202576
1612275208.332807	62	0.3789682686328888
1612275225.5680985	63	0.20187166333198547
1612275241.804805	64	0.27478042244911194
1612275260.90199	65	0.26967930793762207
1612275273.9889417	66	0.31310343742370605
1612275288.882351	67	0.46173468232154846
1612275304.6202357	68	0.3418230414390564
1612275320.740992	69	0.42820513248443604
1612275341.37993	70	0.2624555230140686
1612275356.5054984	71	0.33392226696014404
1612275372.6629567	72	0.37386569380760193
1612275386.8605394	73	0.4137931168079376
1612275405.6114972	74	0.20663900673389435
1612275426.3261867	75	0.2620624303817749
1612275439.0509863	76	0.4222874045372009
1612275458.2117136	77	0.3744911849498749
1612275473.1795542	78	0.20055970549583435
1612275490.7447596	79	0.3333333432674408
1612275509.822864	80	0.3429878056049347
1612275527.2006369	81	0.20987653732299805
1612275545.206533	82	0.1488095223903656
1612275562.438936	83	0.3190271854400635
1612275579.9025013	84	0.14216366410255432
1612275599.1682644	85	0.4277777671813965
1612275614.2456915	86	0.22339028120040894
1612275631.2922883	87	0.3849693238735199
1612275652.5315833	88	0.2492339164018631
1612275671.5470567	89	0.3400309085845947
1612275692.5487971	90	0.39759036898612976
1612275711.161603	91	0.24074074625968933
1612275729.9914682	92	0.3173333406448364
1612275751.7981277	93	0.20301887392997742
1612275768.750639	94	0.24137930572032928
1612275785.3935988	95	0.31662869453430176
1612275804.7853782	96	0.4196891188621521
1612275820.4113522	97	0.20014825463294983
1612275836.73632	98	0.2620087265968323
1612275855.9679842	99	0.3333333432674408
1612275875.5339673	100	0.44693878293037415
