# Supplementary material
Source: ML conference proceedings conference paper supplement (https://proceedings.mlr.press/v139/rahman21a.html)
Supplement: Supplementary file 3 [file rahman21a-supp.zip › ICMLSupportingDoc 2/Visualization/OpenShootingAccuracy/GPL/run-hdtfcdcwuv-tag-Shooting_train_accuracy.csv]

Wall time	Step	Value
1612275892.1979902	0	0.01483812928199768
1612275906.6983175	1	0.022727273404598236
1612275918.0174682	2	0.02100161463022232
1612275930.9522958	3	0.013653289526700974
1612275942.9058926	4	0.01970802992582321
1612275951.2477937	5	0.026986505836248398
1612275965.0979922	6	0.026819923892617226
1612275979.9690964	7	0.02576950564980507
1612275993.753849	8	0.025380710139870644
1612276008.4713137	9	0.015184381976723671
1612276021.9218318	10	0.021463414654135704
1612276038.8042355	11	0.016621984541416168
1612276049.9677637	12	0.010452961549162865
1612276064.6425462	13	0.03066037781536579
1612276075.9689267	14	0.05263157933950424
1612276088.5388205	15	0.03454894572496414
1612276102.866025	16	0.047267355024814606
1612276117.7368727	17	0.05990016460418701
1612276133.805872	18	0.05865921825170517
1612276150.4844754	19	0.046579331159591675
1612276166.4939911	20	0.04231082275509834
1612276182.853426	21	0.05819477513432503
1612276200.140069	22	0.07987711578607559
1612276214.8046727	23	0.08163265138864517
1612276233.6572733	24	0.07983193546533585
1612276248.5641022	25	0.057724956423044205
1612276264.9559357	26	0.06735751032829285
1612276282.4493248	27	0.11044176667928696
1612276300.73844	28	0.03910950571298599
1612276316.5503802	29	0.06339143961668015
1612276333.7654448	30	0.08658009022474289
1612276345.8910394	31	0.13425925374031067
1612276363.0004547	32	0.07005494832992554
1612276375.9923174	33	0.12100456655025482
1612276392.4734323	34	0.1230769231915474
1612276411.1267858	35	0.0935334861278534
1612276428.2903857	36	0.16711589694023132
1612276445.3207502	37	0.17384105920791626
1612276462.8378928	38	0.09326425194740295
1612276481.0908306	39	0.06756756454706192
1612276495.9472358	40	0.11173184216022491
1612276512.4067035	41	0.1232394352555275
1612276529.6508536	42	0.13698630034923553
1612276544.34624	43	0.09905163198709488
1612276559.304141	44	0.08435708284378052
1612276578.5819867	45	0.12525050342082977
1612276593.4644217	46	0.14137214422225952
1612276606.984545	47	0.11861861497163773
1612276619.404272	48	0.10907003283500671
1612276635.4325051	49	0.08374792337417603
1612276649.6161368	50	0.11546391993761063
1612276665.7572975	51	0.2984496057033539
1612276679.755714	52	0.17737296223640442
1612276688.8689842	53	0.16719242930412292
1612276704.502249	54	0.347457617521286
1612276721.0676022	55	0.29807692766189575
1612276735.0418837	56	0.30730050802230835
1612276751.5164402	57	0.14751772582530975
1612276770.9971976	58	0.2605714201927185
1612276786.6580877	59	0.09656777232885361
1612276805.6097407	60	0.15859374403953552
1612276818.7693977	61	0.1442006230354309
1612276832.8958876	62	0.15202702581882477
1612276845.8734314	63	0.20242424309253693
1612276860.4219136	64	0.30463576316833496
1612276876.600157	65	0.3774193525314331
1612276893.7658243	66	0.24104683101177216
1612276906.087719	67	0.39246121048927307
1612276921.3743765	68	0.3885819613933563
1612276936.9296432	69	0.33158811926841736
1612276955.4415214	70	0.2644927501678467
1612276973.2170506	71	0.14262691140174866
1612276989.9152703	72	0.31376516819000244
1612277006.8592002	73	0.24200278520584106
1612277021.4674017	74	0.39461883902549744
1612277036.2800913	75	0.21666666865348816
1612277055.6200223	76	0.22869564592838287
1612277071.6171374	77	0.20841889083385468
1612277087.934484	78	0.27341389656066895
1612277102.7907615	79	0.2855345904827118
1612277121.141845	80	0.29339852929115295
1612277141.3173003	81	0.1731748729944229
1612277157.0053763	82	0.4871794879436493
1612277170.431792	83	0.1640271544456482
1612277191.7299862	84	0.3166869580745697
1612277205.9268272	85	0.37683823704719543
1612277220.1790822	86	0.1656314730644226
1612277232.3232803	87	0.2068965584039688
1612277241.0546136	88	0.21851852536201477
1612277259.5217922	89	0.3090638816356659
1612277275.8784132	90	0.2736196219921112
1612277290.6731124	91	0.22589927911758423
1612277305.9636586	92	0.2170686423778534
1612277323.293302	93	0.29004329442977905
1612277335.152191	94	0.2607142925262451
1612277349.3313036	95	0.20235294103622437
1612277369.0251591	96	0.5680473446846008
1612277385.2363286	97	0.42650601267814636
1612277404.3543127	98	0.22103387117385864
1612277419.6676917	99	0.5792349576950073
1612277433.840741	100	0.2530120611190796
