# Supplementary material
Source: ML conference proceedings conference paper supplement (https://proceedings.mlr.press/v139/rahman21a.html)
Supplement: Supplementary file 3 [file rahman21a-supp.zip › ICMLSupportingDoc 2/Visualization/OpenShootingAccuracy/GPL/run-rldkcmzglx-tag-Shooting_train_accuracy.csv]

Wall time	Step	Value
1612277447.1192904	0	0.0
1612277457.5391915	1	0.06451612710952759
1612277467.7796848	2	0.01682368852198124
1612277480.754393	3	0.02465023286640644
1612277493.0087678	4	0.020517395809292793
1612277504.7590475	5	0.023355577141046524
1612277516.6169615	6	0.01887979917228222
1612277530.3695374	7	0.022491348907351494
1612277543.1008081	8	0.02392604760825634
1612277558.958472	9	0.024729520082473755
1612277570.5715663	10	0.0520833320915699
1612277583.5456593	11	0.018927445635199547
1612277596.1106114	12	0.020344287157058716
1612277609.0213125	13	0.03632236272096634
1612277623.8238504	14	0.023364486172795296
1612277636.0546265	15	0.03212851285934448
1612277647.8624487	16	0.033834587782621384
1612277663.6318438	17	0.052903227508068085
1612277672.088817	18	0.0589519664645195
1612277687.1878426	19	0.07751937955617905
1612277701.6706078	20	0.060648802667856216
1612277716.8893607	21	0.06301824003458023
1612277728.4345927	22	0.0714285746216774
1612277741.6545832	23	0.04378531128168106
1612277752.197386	24	0.08219178020954132
1612277765.788651	25	0.136286199092865
1612277776.4862423	26	0.07195301353931427
1612277794.280928	27	0.051148999482393265
1612277809.9757886	28	0.1979166716337204
1612277824.6858108	29	0.06866197288036346
1612277843.7829225	30	0.08468244224786758
1612277856.524705	31	0.06655844300985336
1612277871.3021524	32	0.10480349510908127
1612277887.0061219	33	0.1349206417798996
1612277903.8287706	34	0.06785714626312256
1612277919.5098479	35	0.14566929638385773
1612277931.9299319	36	0.10526315867900848
1612277944.4549267	37	0.20338982343673706
1612277961.3398385	38	0.17906683683395386
1612277975.4823852	39	0.07097361236810684
1612277990.284897	40	0.1520978957414627
1612278007.525989	41	0.1584022045135498
1612278022.3028944	42	0.22238586843013763
1612278038.0024912	43	0.22926829755306244
1612278048.2445989	44	0.13715046644210815
1612278061.5990546	45	0.17795485258102417
1612278074.6800263	46	0.15539568662643433
1612278086.2376304	47	0.32914572954177856
1612278095.501135	48	0.2682403326034546
1612278110.4573982	49	0.16347123682498932
1612278123.7766614	50	0.22617124021053314
1612278137.8224041	51	0.23404255509376526
1612278149.474798	52	0.1837381273508072
1612278163.537135	53	0.3580034375190735
1612278176.6833544	54	0.28600406646728516
1612278193.3991506	55	0.14118564128875732
1612278207.2570887	56	0.39523810148239136
1612278219.1648386	57	0.4433962404727936
1612278236.0165107	58	0.3333333432674408
1612278247.737827	59	0.34659090638160706
1612278263.2203624	60	0.2885802388191223
1612278277.1252227	61	0.29216867685317993
1612278290.9911935	62	0.14398281276226044
1612278304.0231655	63	0.3224699795246124
1612278317.9344497	64	0.21989528834819794
1612278330.6449213	65	0.22364217042922974
1612278343.4746094	66	0.21199999749660492
1612278356.2220588	67	0.3266666531562805
1612278372.2786317	68	0.2600780129432678
1612278387.9920824	69	0.2678034007549286
1612278401.2962284	70	0.44331640005111694
1612278416.3277373	71	0.2454545497894287
1612278433.6581416	72	0.3800675570964813
1612278443.2859657	73	0.24598930776119232
1612278457.0109444	74	0.3426966369152069
1612278473.1435618	75	0.23513513803482056
1612278487.380258	76	0.31598514318466187
1612278503.8786054	77	0.23268398642539978
1612278520.868666	78	0.26353421807289124
1612278538.727797	79	0.2195121943950653
1612278552.0046878	80	0.2669983506202698
1612278570.630602	81	0.34662577509880066
1612278586.6220782	82	0.5179063081741333
1612278603.7211752	83	0.5046948194503784
1612278619.9775162	84	0.2641791105270386
1612278640.0457997	85	0.44058501720428467
1612278658.6278703	86	0.40353259444236755
1612278673.0381567	87	0.22616137564182281
1612278690.3794074	88	0.21682848036289215
1612278706.692571	89	0.36650869250297546
1612278722.5472891	90	0.23464912176132202
1612278738.5479674	91	0.20441347360610962
1612278757.3459902	92	0.2890625
1612278776.3060744	93	0.28286853432655334
1612278792.9360135	94	0.42352941632270813
1612278808.4235291	95	0.25570228695869446
1612278822.3626366	96	0.1586666703224182
1612278839.2754748	97	0.3408239781856537
1612278855.1856947	98	0.25919732451438904
1612278872.650872	99	0.28018224239349365
1612278888.7607844	100	0.2131979763507843
