# Supplementary material
Source: ML conference proceedings conference paper supplement (https://proceedings.mlr.press/v139/rahman21a.html)
Supplement: Supplementary file 3 [file rahman21a-supp.zip › ICMLSupportingDoc 2/Visualization/OpenShootingAccuracy/GPL/run-xnawgewlkx-tag-Shooting_train_accuracy.csv]

Wall time	Step	Value
1612278902.311924	0	0.0
1612278912.1958997	1	0.0
1612278923.8532205	2	0.030541012063622475
1612278935.1826062	3	0.019274376332759857
1612278946.67499	4	0.044481053948402405
1612278959.3936775	5	0.053905390202999115
1612278970.2659605	6	0.02572096697986126
1612278984.9837785	7	0.02364066243171692
1612278999.7299395	8	0.016036655753850937
1612279014.2719789	9	0.015037594363093376
1612279026.3773432	10	0.019704433158040047
1612279037.8118036	11	0.03333333507180214
1612279053.6900277	12	0.05000000074505806
1612279065.6149495	13	0.03607214614748955
1612279077.4528322	14	0.08235294371843338
1612279092.7815309	15	0.0286561269313097
1612279106.4926379	16	0.0699300691485405
1612279119.942892	17	0.05993690714240074
1612279132.1087086	18	0.03857142850756645
1612279147.46895	19	0.0863930881023407
1612279162.6270406	20	0.04313725605607033
1612279172.626803	21	0.035164836794137955
1612279187.0313532	22	0.051603905856609344
1612279203.8239129	23	0.08143322169780731
1612279218.4309337	24	0.05616224557161331
1612279235.020054	25	0.06428571790456772
1612279248.184117	26	0.05629139021039009
1612279263.715454	27	0.0670640841126442
1612279275.4334633	28	0.12602739036083221
1612279288.187735	29	0.040920715779066086
1612279302.7928855	30	0.07262103259563446
1612279320.6808207	31	0.08721625059843063
1612279338.6338627	32	0.12893082201480865
1612279354.1735356	33	0.05672268941998482
1612279369.0103755	34	0.12556053698062897
1612279384.5285368	35	0.14177215099334717
1612279399.2922428	36	0.09214501827955246
1612279410.8075843	37	0.1150442510843277
1612279427.952042	38	0.1520376205444336
1612279444.1630924	39	0.14616498351097107
1612279458.5506876	40	0.14851485192775726
1612279476.9119892	41	0.20946915447711945
1612279492.781802	42	0.16147635877132416
1612279509.069721	43	0.1606425642967224
1612279527.676824	44	0.13365735113620758
1612279542.6784124	45	0.1806722730398178
1612279559.9256916	46	0.18138986825942993
1612279574.503853	47	0.23871733248233795
1612279592.9188874	48	0.139860138297081
1612279607.669381	49	0.15841583907604218
1612279624.0029926	50	0.28780487179756165
1612279633.23562	51	0.2179836481809616
1612279646.8911972	52	0.2047477811574936
1612279663.796067	53	0.18385650217533112
1612279675.491253	54	0.24169184267520905
1612279691.9919975	55	0.29712459444999695
1612279707.2657857	56	0.41566264629364014
1612279722.7474158	57	0.23011843860149384
1612279736.1610491	58	0.31227436661720276
1612279751.809834	59	0.319029837846756
1612279764.5447888	60	0.2816092073917389
1612279781.115157	61	0.3149350583553314
1612279797.866143	62	0.45119306445121765
1612279812.275299	63	0.21764706075191498
1612279828.1199481	64	0.1875923126935959
1612279846.6230438	65	0.3384094834327698
1612279862.9246473	66	0.3374558389186859
1612279877.3989868	67	0.24137930572032928
1612279892.513714	68	0.35957446694374084
1612279907.3857746	69	0.33770015835762024
1612279922.1095302	70	0.23233532905578613
1612279933.5446699	71	0.34741783142089844
1612279947.4138446	72	0.3523077070713043
1612279965.3689666	73	0.3076923191547394
1612279978.1765394	74	0.3865979313850403
1612279995.3098512	75	0.32774388790130615
1612280009.9403243	76	0.18997107446193695
1612280024.5216014	77	0.33734938502311707
1612280040.1652045	78	0.3096774220466614
1612280056.706148	79	0.40714284777641296
1612280072.9517965	80	0.22612681984901428
1612280088.9466965	81	0.5302197933197021
1612280103.0612786	82	0.44186046719551086
1612280120.496184	83	0.2684444487094879
1612280137.0804582	84	0.3359375
1612280150.7235723	85	0.18105849623680115
1612280169.508083	86	0.4230145812034607
1612280184.5861764	87	0.4585798680782318
1612280202.456422	88	0.2431465983390808
1612280218.754137	89	0.23847925662994385
1612280233.8077693	90	0.2956521809101105
1612280248.7810104	91	0.1908091902732849
1612280263.3209162	92	0.24406331777572632
1612280279.6444404	93	0.20765472948551178
1612280295.5625055	94	0.29403409361839294
1612280314.2838154	95	0.3212735056877136
1612280329.6718693	96	0.239130437374115
1612280346.2009995	97	0.3802816867828369
1612280364.3197167	98	0.24496644735336304
1612280380.8765533	99	0.362601637840271
1612280398.4631288	100	0.30030959844589233
