# Supplementary material
Source: ML conference proceedings conference paper supplement (https://proceedings.mlr.press/v139/rahman21a.html)
Supplement: Supplementary file 3 [file rahman21a-supp.zip › ICMLSupportingDoc 2/Visualization/OpenShootingAccuracy/QL-AM/run-dhzkirtcio-tag-Shooting_train_accuracy2.csv]

Wall time	Step	Value
1612263114.0940056	0	nan
1612263122.2836628	1	0.024682652205228806
1612263130.7496743	2	0.024213075637817383
1612263138.6948	3	0.015748031437397003
1612263146.6085722	4	0.032786883413791656
1612263153.8645782	5	0.02807486616075039
1612263161.915077	6	0.02687801606953144
1612263170.8649626	7	0.02985074557363987
1612263178.968314	8	0.06185567006468773
1612263186.3419943	9	0.08396946638822556
1612263195.7898068	10	0.07116104662418365
1612263205.586781	11	0.01785714365541935
1612263214.2614996	12	0.0279720276594162
1612263224.409403	13	0.032786883413791656
1612263235.008061	14	0.03465346619486809
1612263242.9732234	15	0.016183411702513695
1612263250.5398748	16	0.022727273404598236
1612263258.217229	17	0.02469135820865631
1612263267.5572762	18	0.05009276419878006
1612263278.2159526	19	0.050632912665605545
1612263284.9903715	20	0.05045871436595917
1612263296.9363716	21	0.02651296742260456
1612263304.4773746	22	0.08469945192337036
1612263313.608814	23	0.05607476457953453
1612263322.662238	24	0.06586826592683792
1612263332.08518	25	0.0322180911898613
1612263339.868923	26	0.07392995804548264
1612263348.7011607	27	0.08101265877485275
1612263357.9916995	28	0.0694444477558136
1612263366.8242009	29	0.05947955325245857
1612263378.403349	30	0.060563381761312485
1612263390.5299745	31	0.03519999980926514
1612263399.460008	32	0.0569620244204998
1612263407.0860848	33	0.03924914821982384
1612263415.426912	34	0.0912863090634346
1612263425.868869	35	0.06542056053876877
1612263436.564324	36	0.04210526496171951
1612263444.7974272	37	0.050209205597639084
1612263452.8162181	38	0.04509283974766731
1612263463.973638	39	0.027513228356838226
1612263471.7905302	40	0.06976744532585144
1612263481.1570358	41	0.04532577842473984
1612263490.5570712	42	0.047493401914834976
1612263501.1091928	43	0.0784313753247261
1612263507.8820372	44	0.12903225421905518
1612263517.3448205	45	0.09012875705957413
1612263527.5716443	46	0.06849315017461777
1612263533.670544	47	0.0397351011633873
1612263542.6141741	48	0.0661577582359314
1612263552.0539544	49	0.0476190485060215
1612263559.0490017	50	0.0824742242693901
1612263567.6040022	51	0.0555555559694767
1612263577.0082543	52	0.07211538404226303
1612263583.7996068	53	0.03913043439388275
1612263592.96094	54	0.049450550228357315
1612263603.7342324	55	0.06666667014360428
1612263611.8853202	56	0.05246422812342644
1612263621.3716342	57	0.057591624557971954
1612263631.4957378	58	0.06930693238973618
1612263640.519031	59	0.06930693238973618
1612263651.0928996	60	0.04583333432674408
1612263659.050812	61	0.04301075264811516
1612263668.6869705	62	0.07042253762483597
1612263677.990759	63	0.09090909361839294
1612263686.731418	64	0.05645161122083664
1612263695.508492	65	0.06428571790456772
1612263703.741201	66	0.0555555559694767
1612263714.7162795	67	0.06145251542329788
1612263725.2286458	68	0.07731958478689194
1612263734.333129	69	0.07630521804094315
1612263741.536556	70	0.10928961634635925
1612263751.7759495	71	0.10509554296731949
1612263762.6900594	72	0.05517241358757019
1612263771.1330523	73	0.05714285746216774
1612263779.7250414	74	0.05384615436196327
1612263787.4744458	75	0.072727270424366
1612263796.0639942	76	0.04289940744638443
1612263804.4385023	77	0.0670391097664833
1612263813.8796773	78	0.06766917556524277
1612263824.6925185	79	0.0625
1612263833.485061	80	0.09350649267435074
1612263843.3378155	81	0.04368932172656059
1612263850.8890576	82	0.06440678238868713
1612263859.4509022	83	0.056716419756412506
1612263867.8705673	84	0.07526881992816925
1612263877.2620125	85	0.07053942233324051
1612263888.9963038	86	0.062240663915872574
1612263896.7653723	87	0.125
1612263905.6525664	88	0.03642383962869644
1612263914.341629	89	0.10132158547639847
1612263922.1106768	90	0.043478261679410934
1612263930.0826046	91	0.06395348906517029
1612263937.5480661	92	0.07203389704227448
1612263949.4650402	93	0.09310344606637955
1612263957.4384975	94	0.12738853693008423
1612263968.3639483	95	0.07281553745269775
1612263974.5892615	96	0.13333334028720856
1612263984.1888635	97	0.080924853682518
1612263994.038875	98	0.05585106462240219
1612264001.8133147	99	0.04065040498971939
1612264011.505269	100	0.10837438702583313
