# Supplementary material
Source: ML conference proceedings conference paper supplement (https://proceedings.mlr.press/v139/rahman21a.html)
Supplement: Supplementary file 3 [file rahman21a-supp.zip › ICMLSupportingDoc 2/Visualization/OpenShootingAccuracy/QL-AM/run-edaknggtca-tag-Shooting_train_accuracy2.csv]

Wall time	Step	Value
1612264020.8301	0	0.03333333507180214
1612264030.745573	1	0.018546365201473236
1612264040.2021694	2	0.01937134563922882
1612264049.2405906	3	0.024193547666072845
1612264057.536063	4	0.013513513840734959
1612264066.7379298	5	0.020708082243800163
1612264075.2410293	6	0.02631578966975212
1612264085.3327463	7	0.025641025975346565
1612264093.4737225	8	0.05797101557254791
1612264101.1996367	9	0.0714285746216774
1612264109.228753	10	0.010204081423580647
1612264118.0604613	11	0.1538461595773697
1612264124.3267987	12	0.0
1612264131.1668785	13	0.0803571417927742
1612264138.6827538	14	0.021868787705898285
1612264146.763759	15	0.006535947788506746
1612264156.52038	16	0.0385604128241539
1612264168.1708333	17	0.01785714365541935
1612264177.6527464	18	0.02769230678677559
1612264187.04029	19	0.038997214287519455
1612264197.2323132	20	0.033596839755773544
1612264205.9104493	21	0.03926701471209526
1612264215.289514	22	0.03892944008111954
1612264223.6330726	23	0.026512013748288155
1612264233.192588	24	0.030084235593676567
1612264241.0794547	25	0.043062202632427216
1612264250.5972826	26	0.04123711213469505
1612264260.5588825	27	0.043795619159936905
1612264270.605779	28	0.056680161505937576
1612264280.3347325	29	0.0535714291036129
1612264291.3901756	30	0.043656207621097565
1612264301.595244	31	0.020967742428183556
1612264309.6928465	32	0.04535637050867081
1612264317.5941346	33	0.027906976640224457
1612264326.9488807	34	0.05912596359848976
1612264336.871919	35	0.04048582911491394
1612264343.8826408	36	0.03211009129881859
1612264353.6262321	37	0.044034089893102646
1612264360.6283786	38	0.0181818176060915
1612264368.757924	39	0.04538341239094734
1612264377.8369865	40	0.03585657477378845
1612264386.0092168	41	0.0527522936463356
1612264395.047917	42	0.052272725850343704
1612264402.6056025	43	0.050147492438554764
1612264408.6672616	44	0.05921052768826485
1612264417.9112463	45	0.031938325613737106
1612264429.5016599	46	0.04414261505007744
1612264437.474681	47	0.0629139095544815
1612264447.268261	48	0.05454545468091965
1612264456.2381005	49	0.0625
1612264466.68249	50	0.08616188168525696
1612264475.2162535	51	0.04878048598766327
1612264487.5200613	52	0.052558783441782
1612264497.7751672	53	0.07648725062608719
1612264507.855991	54	0.057251907885074615
1612264517.5252917	55	0.032258063554763794
1612264528.1783602	56	0.09615384787321091
1612264535.3421683	57	0.08284023404121399
1612264545.949131	58	0.08421052992343903
1612264556.7920558	59	0.041214749217033386
1612264565.9646373	60	0.06849315017461777
1612264573.4781733	61	0.035211268812417984
1612264584.4493182	62	0.032258063554763794
1612264594.6449883	63	0.07977207750082016
1612264602.4848688	64	0.07352941483259201
1612264612.1018097	65	0.03932584449648857
1612264623.4718866	66	0.05564648285508156
1612264634.1051185	67	0.0731707289814949
1612264643.5789702	68	0.09550561755895615
1612264655.5892253	69	0.06546275317668915
1612264664.5553606	70	0.04651162773370743
1612264675.024526	71	0.09701492637395859
1612264684.8185124	72	0.0714285746216774
1612264693.0930004	73	0.07391304522752762
1612264703.6561642	74	0.0625
1612264711.8012736	75	0.04641350358724594
1612264720.0784585	76	0.0416666679084301
1612264728.4303799	77	0.1071428582072258
1612264737.208515	78	0.05352798104286194
1612264745.2040274	79	0.0939597338438034
1612264753.2219071	80	0.0651041641831398
1612264762.2320228	81	0.08368200808763504
1612264771.9060996	82	0.07692307978868484
1612264783.4031951	83	0.07808564603328705
1612264791.5530908	84	0.0714285746216774
1612264800.4763126	85	0.06432748585939407
1612264811.1514487	86	0.07894736528396606
1612264820.8441408	87	0.10619468986988068
1612264830.9323325	88	0.05281690135598183
1612264840.7633479	89	0.09240923821926117
1612264847.9180326	90	0.04907975345849991
1612264854.9990995	91	0.057692307978868484
1612264862.433772	92	0.04748603329062462
1612264872.659271	93	0.08280254900455475
1612264882.908206	94	0.09604519605636597
1612264892.9000337	95	0.07216494530439377
1612264903.621532	96	0.08163265138864517
1612264913.0641706	97	0.038288287818431854
1612264925.1482499	98	0.06909091025590897
1612264934.0398633	99	0.09803921729326248
1612264943.6424346	100	0.0827067643404007
