# Supplementary material
Source: ML conference proceedings conference paper supplement (https://proceedings.mlr.press/v139/rahman21a.html)
Supplement: Supplementary file 3 [file rahman21a-supp.zip › ICMLSupportingDoc 2/Visualization/OpenShootingAccuracy/QL-AM/run-grvsjnkfrt-tag-Shooting_train_accuracy2.csv]

Wall time	Step	Value
1612264952.4187849	0	nan
1612264959.4810944	1	0.016679301857948303
1612264966.6634324	2	0.020845070481300354
1612264975.4867215	3	0.006511627696454525
1612264985.4520378	4	0.02215508557856083
1612264994.2103202	5	0.03703703731298447
1612265001.8111746	6	0.016788320615887642
1612265009.8446562	7	0.04054053872823715
1612265017.7813754	8	0.0
1612265025.4420962	9	0.036082472652196884
1612265035.8636744	10	0.04458598792552948
1612265044.6498137	11	0.03703703731298447
1612265055.5399091	12	0.007686932105571032
1612265064.5264738	13	0.03846153989434242
1612265073.0287454	14	0.03491271659731865
1612265083.687075	15	0.03235294297337532
1612265092.183699	16	0.02545454539358616
1612265104.299291	17	0.03755868598818779
1612265112.3012211	18	0.030136985704302788
1612265121.6377132	19	0.03478260710835457
1612265130.5218258	20	0.04203539714217186
1612265141.2491817	21	0.04435483738780022
1612265151.8379872	22	0.03479853644967079
1612265162.0892713	23	0.02719406597316265
1612265171.484283	24	0.041050903499126434
1612265180.2862985	25	0.02664692886173725
1612265191.8494408	26	0.06060606241226196
1612265201.724163	27	0.08148147910833359
1612265211.7801983	28	0.05540896952152252
1612265222.1607687	29	0.03284671530127525
1612265229.6951125	30	0.06730769574642181
1612265237.5092463	31	0.042276423424482346
1612265247.044736	32	0.028865979984402657
1612265255.4051538	33	0.05098039284348488
1612265263.7955208	34	0.06201550364494324
1612265270.3332236	35	0.07467532157897949
1612265279.3077698	36	0.029565216973423958
1612265289.3556612	37	0.05775076150894165
1612265298.7992861	38	0.03729281947016716
1612265307.3910704	39	0.10404624044895172
1612265316.8156233	40	0.058394160121679306
1612265326.5370014	41	0.06321839243173599
1612265333.7017102	42	0.0486111119389534
1612265342.9067104	43	0.1071428582072258
1612265352.1454403	44	0.13812154531478882
1612265360.4057589	45	0.06666667014360428
1612265368.444662	46	0.05288461595773697
1612265378.926456	47	0.04683195427060127
1612265386.871374	48	0.14814814925193787
1612265398.2866924	49	0.07017543911933899
1612265407.9375727	50	0.09090909361839294
1612265417.5162306	51	0.16058394312858582
1612265425.5312738	52	0.02589641511440277
1612265437.5136065	53	0.07228915393352509
1612265446.2716694	54	0.1034482792019844
1612265454.712602	55	0.0859728530049324
1612265464.8377392	56	0.05000000074505806
1612265473.604497	57	0.09937888383865356
1612265483.9077888	58	0.04828973859548569
1612265492.827904	59	0.05106382817029953
1612265502.0733397	60	0.08771929889917374
1612265510.949987	61	0.10052909702062607
1612265521.0254905	62	0.059347182512283325
1612265530.36292	63	0.09090909361839294
1612265536.9072068	64	0.057416267693042755
1612265545.9277558	65	0.06285714358091354
1612265555.496336	66	0.0714285746216774
1612265564.0219395	67	0.0746268630027771
1612265572.7818818	68	0.09677419066429138
1612265580.7310755	69	0.09467455744743347
1612265589.1288617	70	0.07984790951013565
1612265598.6579092	71	0.05460750684142113
1612265606.9734862	72	0.05614035204052925
1612265617.685499	73	0.037151701748371124
1612265629.2863386	74	0.05121293663978577
1612265640.1004796	75	0.08378378301858902
1612265651.4668562	76	0.03966942057013512
1612265660.999905	77	0.06041666492819786
1612265671.1860008	78	0.0793650820851326
1612265680.7010133	79	0.11764705926179886
1612265689.900073	80	0.06648199260234833
1612265698.5256915	81	0.04725898057222366
1612265706.6308496	82	0.07536231726408005
1612265715.8934717	83	0.07526881992816925
1612265724.4814317	84	0.09392265230417252
1612265732.8813987	85	0.072727270424366
1612265741.8124416	86	0.08029197156429291
1612265750.220544	87	0.05614973232150078
1612265759.6619952	88	0.06796116381883621
1612265767.934434	89	0.08235294371843338
1612265776.5524845	90	0.07692307978868484
1612265786.2123497	91	0.0833333358168602
1612265794.864556	92	0.057220708578825
1612265802.5145483	93	0.09478673338890076
1612265813.342995	94	0.09600000083446503
1612265821.1767745	95	0.0714285746216774
1612265831.965869	96	0.12903225421905518
1612265840.7598467	97	0.08401083946228027
1612265849.4103334	98	0.06425702571868896
1612265859.1854143	99	0.08403361588716507
1612265867.9945633	100	0.08433734625577927
