# Supplementary material
Source: ML conference proceedings conference paper supplement (https://proceedings.mlr.press/v139/rahman21a.html)
Supplement: Supplementary file 3 [file rahman21a-supp.zip › ICMLSupportingDoc 2/Visualization/OpenShootingAccuracy/QL-AM/run-iodbrjkxfn-tag-Shooting_train_accuracy2.csv]

Wall time	Step	Value
1612265875.6245189	0	nan
1612265883.069502	1	0.005988024175167084
1612265890.7734725	2	0.017094017937779427
1612265901.0121882	3	0.019751952961087227
1612265908.5399327	4	0.013406939804553986
1612265917.095535	5	0.01466736476868391
1612265926.8614872	6	0.02456839382648468
1612265936.4970233	7	0.018288223072886467
1612265946.107335	8	0.0
1612265954.3700957	9	0.045296166092157364
1612265965.1846318	10	0.025641025975346565
1612265973.4471657	11	0.0555555559694767
1612265983.209454	12	0.08124999701976776
1612265993.1289315	13	0.0
1612266001.7257419	14	0.023255813866853714
1612266010.5373962	15	0.03201970458030701
1612266019.9396412	16	0.02822580561041832
1612266027.276557	17	0.038860104978084564
1612266038.263521	18	0.032967034727334976
1612266050.0348809	19	0.03963414579629898
1612266060.3327217	20	0.019138755276799202
1612266068.019759	21	0.03490759804844856
1612266076.1509461	22	0.019591836258769035
1612266083.0772617	23	0.03361344709992409
1612266094.5283933	24	0.027061045169830322
1612266102.2123146	25	0.05128205195069313
1612266113.2003014	26	0.0381355918943882
1612266122.1467686	27	0.04333333298563957
1612266130.6254134	28	0.04887983575463295
1612266142.208187	29	0.0500982329249382
1612266151.70518	30	0.05655527114868164
1612266160.7533035	31	0.0635359138250351
1612266171.1088123	32	0.034700315445661545
1612266181.99926	33	0.03404669091105461
1612266191.5948372	34	0.05840707942843437
1612266201.7755635	35	0.03787878900766373
1612266211.7359278	36	0.04287901893258095
1612266220.916721	37	0.08250000327825546
1612266231.5063078	38	0.058700211346149445
1612266241.918854	39	0.09090909361839294
1612266252.4059713	40	0.06100795790553093
1612266262.8819237	41	0.06926406919956207
1612266270.7350192	42	0.06954887509346008
1612266280.3621898	43	0.0377604179084301
1612266289.785268	44	0.07428571581840515
1612266299.058606	45	0.05679513141512871
1612266306.794341	46	0.07894736528396606
1612266316.2343183	47	0.08267716318368912
1612266326.0925097	48	0.09486165642738342
1612266332.9947898	49	0.06081081181764603
1612266343.5246897	50	0.11229946464300156
1612266353.2546756	51	0.07906977087259293
1612266359.97509	52	0.06081081181764603
1612266370.2652926	53	0.05058365687727928
1612266379.988799	54	0.08287292718887329
1612266390.816961	55	0.05804749205708504
1612266399.1486917	56	0.043062202632427216
1612266410.9085383	57	0.06537102162837982
1612266418.2257318	58	0.03619909659028053
1612266425.3096852	59	0.09467455744743347
1612266435.621048	60	0.05607476457953453
1612266444.9566145	61	0.058139536529779434
1612266454.1680927	62	0.05376344174146652
1612266463.3532643	63	0.08542713522911072
1612266473.044773	64	0.06329113990068436
1612266480.770784	65	0.07537688314914703
1612266491.313997	66	0.05907173082232475
1612266499.7316773	67	0.09311740845441818
1612266507.7493849	68	0.060465116053819656
1612266517.550376	69	0.07751937955617905
1612266527.6105676	70	0.0684647336602211
1612266537.7882986	71	0.09243697673082352
1612266545.719693	72	0.07407407462596893
1612266555.0471036	73	0.07467532157897949
1612266565.0620847	74	0.06854838877916336
1612266574.3284929	75	0.06128133833408356
1612266582.4868279	76	0.06115107983350754
1612266591.1854348	77	0.062176164239645004
1612266601.273582	78	0.04295942559838295
1612266610.4718742	79	0.050632912665605545
1612266621.2420833	80	0.06072874367237091
1612266628.2495549	81	0.06741572916507721
1612266638.6611986	82	0.09565217047929764
1612266650.4944618	83	0.08516483753919601
1612266660.4385629	84	0.07092198729515076
1612266670.8731627	85	0.07371795177459717
1612266680.3876493	86	0.09433962404727936
1612266688.864077	87	0.10835913568735123
1612266699.2472928	88	0.07407407462596893
1612266711.376298	89	0.07637231796979904
1612266719.823465	90	0.046551723033189774
1612266729.5043335	91	0.07999999821186066
1612266739.8915088	92	0.06375838816165924
1612266749.4903696	93	0.07192982733249664
1612266757.9502094	94	0.14084507524967194
1612266764.3350356	95	0.06666667014360428
1612266772.662983	96	0.07216494530439377
1612266781.7151115	97	0.07073955237865448
1612266791.64481	98	0.061181433498859406
1612266799.8252165	99	0.08399999886751175
1612266809.0648224	100	0.043478261679410934
