# Supplementary material
Source: ML conference proceedings conference paper supplement (https://proceedings.mlr.press/v139/rahman21a.html)
Supplement: Supplementary file 3 [file rahman21a-supp.zip › ICMLSupportingDoc 2/Visualization/OpenShootingAccuracy/QL-AM/run-ofhfdedubf-tag-Shooting_train_accuracy2.csv]

Wall time	Step	Value
1612266817.457435	0	nan
1612266826.7707891	1	0.015325670130550861
1612266837.4371352	2	0.01909547671675682
1612266848.3146284	3	0.01440329197794199
1612266860.4557765	4	0.028368793427944183
1612266871.1474125	5	0.010624170303344727
1612266882.2391553	6	0.014094955287873745
1612266891.7570844	7	0.011520737782120705
1612266902.4127045	8	0.005780346691608429
1612266911.9206316	9	0.0397351011633873
1612266923.62119	10	0.028776979073882103
1612266934.2637193	11	0.02283105067908764
1612266943.8332198	12	0.011272141709923744
1612266956.2157073	13	0.02351314015686512
1612266966.9076807	14	0.03269754722714424
1612266978.9198735	15	0.032608695328235626
1612266989.759573	16	0.017006803303956985
1612267001.8890674	17	0.025401068851351738
1612267014.4521587	18	0.03841536492109299
1612267027.2580955	19	0.0717821791768074
1612267039.8590367	20	0.057692307978868484
1612267048.762025	21	0.037383176386356354
1612267059.0759616	22	0.056603774428367615
1612267068.294437	23	0.04411764815449715
1612267080.0446405	24	0.057416267693042755
1612267090.3814385	25	0.052521008998155594
1612267100.273271	26	0.046692606061697006
1612267112.0444117	27	0.04958677664399147
1612267122.319707	28	0.02849740907549858
1612267131.8795066	29	0.08585858345031738
1612267143.4801202	30	0.02524038404226303
1612267154.2168138	31	0.10000000149011612
1612267165.3428035	32	0.05429864302277565
1612267176.0597224	33	0.06691449880599976
1612267187.5011466	34	0.042918454855680466
1612267197.5393496	35	0.053892213851213455
1612267207.9804342	36	0.06557376682758331
1612267220.9277186	37	0.041999999433755875
1612267232.2467003	38	0.03966005519032478
1612267242.9004781	39	0.03875968977808952
1612267251.8457546	40	0.04771784320473671
1612267264.1523843	41	0.02354145422577858
1612267278.791757	42	0.04627249389886856
1612267290.8808873	43	0.0670103058218956
1612267303.9992263	44	0.07500000298023224
1612267314.772088	45	0.072727270424366
1612267325.1638935	46	0.03999999910593033
1612267338.1456742	47	0.05436893180012703
1612267348.8448203	48	0.07329843193292618
1612267359.2373025	49	0.0703125
1612267371.0797818	50	0.10112359374761581
1612267381.195687	51	0.03781512752175331
1612267390.0832028	52	0.0330033004283905
1612267399.7562306	53	0.062745101749897
1612267411.957856	54	0.1160714253783226
1612267423.5786514	55	0.07909604161977768
1612267433.9784272	56	0.036437246948480606
1612267445.2193577	57	0.05494505539536476
1612267457.6342309	58	0.04580152779817581
1612267469.4437191	59	0.07339449226856232
1612267482.100767	60	0.0439189188182354
1612267495.4188669	61	0.044378697872161865
1612267508.5728455	62	0.058165546506643295
1612267523.0590584	63	0.06632652878761292
1612267536.701619	64	0.05804749205708504
1612267548.6274347	65	0.08962263911962509
1612267560.872525	66	0.05737704783678055
1612267569.0145257	67	0.04746835306286812
1612267579.9482415	68	0.07509881258010864
1612267591.3438826	69	0.07443365454673767
1612267601.4830225	70	0.04968944191932678
1612267614.2016828	71	0.0976744219660759
1612267625.7432485	72	0.04011461138725281
1612267634.0935256	73	0.05045871436595917
1612267643.9745407	74	0.053921569138765335
1612267653.2731059	75	0.05637982115149498
1612267662.8657718	76	0.04032257944345474
1612267673.0901718	77	0.05570291727781296
1612267683.2797675	78	0.0379146933555603
1612267692.5123713	79	0.05521472543478012
1612267702.255333	80	0.09836065769195557
1612267714.803474	81	0.039094649255275726
1612267727.7001994	82	0.05523809418082237
1612267737.956166	83	0.0677083358168602
1612267748.4671004	84	0.04990758001804352
1612267760.8654075	85	0.09677419066429138
1612267770.9551857	86	0.0560000017285347
1612267782.8762174	87	0.04335260018706322
1612267793.7171524	88	0.05291970819234848
1612267806.1057134	89	0.07423580437898636
1612267818.8750365	90	0.08355794847011566
1612267828.7184484	91	0.0416666679084301
1612267837.2304492	92	0.06756756454706192
1612267849.3003235	93	0.06769230961799622
1612267861.0160878	94	0.11637931317090988
1612267870.9409964	95	0.05286343768239021
1612267882.6690705	96	0.07090464234352112
1612267892.1668944	97	0.1090909093618393
1612267901.6194162	98	0.04597701132297516
1612267912.7194633	99	0.07430340349674225
1612267923.5076036	100	0.06009615212678909
