# Supplementary material
Source: ML conference proceedings conference paper supplement (https://proceedings.mlr.press/v139/rahman21a.html)
Supplement: Supplementary file 3 [file rahman21a-supp.zip › ICMLSupportingDoc 2/Visualization/OpenShootingAccuracy/QL-AM/run-qtldaqxlkc-tag-Shooting_train_accuracy2.csv]

Wall time	Step	Value
1612267933.0060837	0	nan
1612267942.8154795	1	0.019290123134851456
1612267952.992977	2	0.014519906602799892
1612267963.9910164	3	0.027491409331560135
1612267974.0467007	4	0.02411223202943802
1612267980.9461057	5	0.017419354990124702
1612267993.112216	6	0.018955154344439507
1612268003.1863194	7	0.02369077317416668
1612268012.060429	8	0.015537332743406296
1612268022.3084936	9	0.029787234961986542
1612268031.9458983	10	0.024570023640990257
1612268040.852987	11	0.014084506779909134
1612268050.000858	12	0.012658228166401386
1612268059.2778018	13	0.013496932573616505
1612268071.5092099	14	0.010956902988255024
1612268081.8816605	15	0.01819923333823681
1612268090.3301387	16	0.03050847537815571
1612268100.5402732	17	0.032804232090711594
1612268110.7282712	18	0.03420195356011391
1612268121.1764567	19	0.062972292304039
1612268130.5092955	20	0.03505535051226616
1612268143.1411855	21	0.03978779911994934
1612268153.8799777	22	0.03207547217607498
1612268162.6837156	23	0.03396226465702057
1612268172.2644982	24	0.047979798167943954
1612268181.5912282	25	0.06493506580591202
1612268192.7408154	26	0.04436229169368744
1612268202.1267533	27	0.04929577559232712
1612268210.965071	28	0.056603774428367615
1612268221.5393038	29	0.07225433737039566
1612268232.5918715	30	0.04562043771147728
1612268243.1182194	31	0.0889570564031601
1612268252.847008	32	0.03784860670566559
1612268261.2143393	33	0.051094889640808105
1612268271.5995476	34	0.045584045350551605
1612268281.318285	35	0.03016970492899418
1612268291.985037	36	0.05213269963860512
1612268303.3564057	37	0.05846153944730759
1612268312.1576385	38	0.024096384644508362
1612268322.358524	39	0.0874524712562561
1612268333.88003	40	0.046296294778585434
1612268344.519399	41	0.05309734493494034
1612268355.3812268	42	0.04417670518159866
1612268366.629115	43	0.05303030461072922
1612268376.353665	44	0.07718120515346527
1612268387.2495782	45	0.07339449226856232
1612268397.4221294	46	0.029045643284916878
1612268407.6660979	47	0.046966731548309326
1612268417.7256844	48	0.06896551698446274
1612268427.9398441	49	0.07949791103601456
1612268438.707951	50	0.07902735471725464
1612268447.8464494	51	0.09090909361839294
1612268458.2033014	52	0.10294117778539658
1612268471.1169946	53	0.07932011038064957
1612268482.9100552	54	0.04727272689342499
1612268494.245909	55	0.06842105090618134
1612268505.4675887	56	0.11731843650341034
1612268517.1319642	57	0.06756756454706192
1612268530.263238	58	0.07092198729515076
1612268542.2267761	59	0.04545454680919647
1612268551.9122226	60	0.06593406945466995
1612268562.6998243	61	0.04430379718542099
1612268573.237247	62	0.08201892673969269
1612268582.6178558	63	0.10691823810338974
1612268593.4346583	64	0.0477386936545372
1612268606.1200933	65	0.06198346987366676
1612268617.8208144	66	0.0791366919875145
1612268626.5490503	67	0.06930693238973618
1612268639.4281154	68	0.07166124135255814
1612268649.9961057	69	0.10982658714056015
1612268660.346953	70	0.080924853682518
1612268671.4882076	71	0.06880734115839005
1612268682.2269568	72	0.10084033757448196
1612268694.677336	73	0.10204081982374191
1612268707.5349028	74	0.12738853693008423
1612268719.2598753	75	0.04692082107067108
1612268730.477304	76	0.1090909093618393
1612268740.1778889	77	0.08280254900455475
1612268749.4219635	78	0.0793650820851326
1612268760.3186762	79	0.06367041170597076
1612268769.8791645	80	0.0793650820851326
1612268780.674932	81	0.08355794847011566
1612268789.8419647	82	0.041614122688770294
1612268800.571219	83	0.11363636702299118
1612268811.9313626	84	0.08235294371843338
1612268821.8386335	85	0.0714285746216774
1612268829.123359	86	0.14035087823867798
1612268838.8437665	87	0.13124999403953552
1612268847.3627622	88	0.10476190596818924
1612268857.7801988	89	0.059139784425497055
1612268868.4013267	90	0.07926829159259796
1612268877.5211408	91	0.048638131469488144
1612268889.6344566	92	0.09890110045671463
1612268900.1846874	93	0.07518796622753143
1612268909.40541	94	0.06685236841440201
1612268920.5678139	95	0.07707910984754562
1612268930.114009	96	0.0381944440305233
1612268938.3029082	97	0.12230215966701508
1612268949.2503598	98	0.09803921729326248
1612268962.6094475	99	0.07222222536802292
1612268971.0126848	100	0.06914893537759781
