# Supplementary material
Source: ML conference proceedings conference paper supplement (https://proceedings.mlr.press/v139/rahman21a.html)
Supplement: Supplementary file 3 [file rahman21a-supp.zip › ICMLSupportingDoc 2/Visualization/OpenShootingAccuracy/QL-AM/run-rxgenpnipo-tag-Shooting_train_accuracy2.csv]

Wall time	Step	Value
1612268978.7592006	0	nan
1612268987.9491289	1	0.01604052260518074
1612268994.9205377	2	0.016744809225201607
1612269002.066547	3	0.020017405971884727
1612269013.0429153	4	0.021621622145175934
1612269022.8445709	5	nan
1612269032.5584826	6	0.013492475263774395
1612269045.5396411	7	0.012870012782514095
1612269054.2351933	8	nan
1612269066.1451283	9	0.03399433568120003
1612269073.4271634	10	0.06521739065647125
1612269082.1534657	11	0.02097902074456215
1612269093.6601493	12	0.0714285746216774
1612269102.3446312	13	0.0
1612269112.210749	14	0.01515151560306549
1612269121.463457	15	0.029360966756939888
1612269131.0821698	16	0.02255639061331749
1612269140.5146425	17	0.04533333331346512
1612269149.438415	18	0.0451977401971817
1612269159.2872365	19	0.04399999976158142
1612269169.5648158	20	0.02652106061577797
1612269179.9169607	21	0.03692307695746422
1612269189.5155108	22	0.05864197388291359
1612269198.7065814	23	0.060737527906894684
1612269210.6147656	24	0.058974359184503555
1612269222.185236	25	0.046113308519124985
1612269232.5796516	26	0.028949545696377754
1612269244.07176	27	0.047787610441446304
1612269252.945596	28	0.04978355020284653
1612269265.9473586	29	0.053278688341379166
1612269276.4256976	30	0.05747126415371895
1612269289.5738957	31	0.05747126415371895
1612269302.4388072	32	0.03490759804844856
1612269313.5044262	33	0.047493401914834976
1612269327.1325674	34	0.04593176022171974
1612269339.226073	35	0.05621301755309105
1612269353.633873	36	0.022480620071291924
1612269363.2141917	37	0.04054053872823715
1612269375.8085353	38	0.06402438879013062
1612269387.4617245	39	0.03129074349999428
1612269400.9613066	40	0.04491018131375313
1612269413.9965158	41	0.048426151275634766
1612269428.8963535	42	0.07999999821186066
1612269441.870339	43	0.045614033937454224
1612269456.3863225	44	0.03814714029431343
1612269467.1311288	45	0.131386861205101
1612269480.96316	46	0.0625
1612269494.5617144	47	0.08375634253025055
1612269505.2315357	48	0.10160427540540695
1612269517.5484095	49	0.0855855867266655
1612269528.255337	50	0.050632912665605545
1612269537.623935	51	0.079310342669487
1612269549.2207742	52	0.05422993376851082
1612269558.833809	53	0.02504817023873329
1612269570.0344875	54	0.07216494530439377
1612269580.7572587	55	0.03999999910593033
1612269589.0604372	56	0.0359281450510025
1612269601.7588203	57	0.03863298520445824
1612269614.862422	58	0.05276381969451904
1612269625.0644505	59	0.04900181666016579
1612269636.0973244	60	0.04835589975118637
1612269649.898878	61	0.05543237179517746
1612269661.826968	62	0.04858934134244919
1612269674.159696	63	0.0554414801299572
1612269686.2991693	64	0.06666667014360428
1612269697.9548411	65	0.0714285746216774
1612269712.5882747	66	0.03231597691774368
1612269724.9885135	67	0.05054151639342308
1612269738.556527	68	0.04900181666016579
1612269751.8871496	69	0.032815199345350266
1612269765.2695954	70	0.06066536158323288
1612269775.5661392	71	0.06493506580591202
1612269788.2027416	72	0.06614785641431808
1612269799.7810004	73	0.03875968977808952
1612269812.7050707	74	0.046568628400564194
1612269823.3910072	75	0.05263157933950424
1612269832.6769555	76	0.09375
1612269842.7286086	77	0.044917259365320206
1612269854.3813863	78	0.06521739065647125
1612269862.8852782	79	0.04261363670229912
1612269873.7155418	80	0.13698630034923553
1612269884.3778727	81	0.05466970428824425
1612269893.1257377	82	0.05925925821065903
1612269903.5898354	83	0.06360424309968948
1612269912.649585	84	0.07909604161977768
1612269922.2806199	85	0.05726872384548187
1612269936.9631004	86	0.058571428060531616
1612269951.0663655	87	0.06636155396699905
1612269964.122792	88	0.08128079026937485
1612269975.8018312	89	0.06060606241226196
1612269988.8969622	90	0.06750000268220901
1612270000.3783152	91	0.07179487496614456
1612270013.687334	92	0.048469386994838715
1612270023.7065837	93	0.05678233504295349
1612270038.7991397	94	0.078125
1612270049.3392706	95	0.047413792461156845
1612270061.9827037	96	0.04406779631972313
1612270075.144496	97	0.05338078364729881
1612270086.4268432	98	0.06218905374407768
1612270099.8939888	99	0.06989247351884842
1612270113.2181778	100	0.04856512323021889
