# Supplementary material
Source: ML conference proceedings conference paper supplement (https://proceedings.mlr.press/v139/rahman21a.html)
Supplement: Supplementary file 3 [file rahman21a-supp.zip › ICMLSupportingDoc 2/Visualization/OpenShootingAccuracy/QL-AM/run-sbbrltrgix-tag-Shooting_train_accuracy2.csv]

Wall time	Step	Value
1612270123.8285956	0	0.01756536029279232
1612270136.6845827	1	0.01906614750623703
1612270145.718484	2	0.01613742858171463
1612270159.002454	3	0.018444666638970375
1612270169.7008178	4	0.015193370170891285
1612270180.4784153	5	0.018121911212801933
1612270191.0014093	6	0.028455285355448723
1612270199.6643949	7	0.0
1612270211.6053023	8	0.02003338932991028
1612270226.5029154	9	0.02247191034257412
1612270237.653154	10	0.05263157933950424
1612270250.113474	11	0.01995798386633396
1612270264.1039827	12	0.013597032986581326
1612270275.8691988	13	0.03846153989434242
1612270288.7767978	14	0.039603959769010544
1612270302.7732663	15	0.04173913225531578
1612270313.2871306	16	0.023255813866853714
1612270320.3763793	17	0.02849740907549858
1612270334.5139947	18	0.055837564170360565
1612270347.4702024	19	0.03255340829491615
1612270356.944403	20	0.03802281245589256
1612270367.446311	21	0.03291139379143715
1612270381.204664	22	0.05919661745429039
1612270391.0329702	23	0.05040322616696358
1612270404.2511475	24	0.0346083790063858
1612270415.1306298	25	0.07920791953802109
1612270427.3058708	26	0.04680851101875305
1612270441.071183	27	0.044609665870666504
1612270451.4164991	28	0.08898305147886276
1612270466.60046	29	0.058139536529779434
1612270477.1078405	30	0.04651162773370743
1612270491.07266	31	0.04520547762513161
1612270502.4017553	32	0.042394015938043594
1612270513.8283715	33	0.05128205195069313
1612270525.93535	34	0.08389262109994888
1612270535.2880943	35	0.033707864582538605
1612270550.723351	36	0.05531914904713631
1612270563.9324946	37	0.057046979665756226
1612270573.9373481	38	0.03529411926865578
1612270586.6731381	39	0.02880658395588398
1612270599.259779	40	0.04794520512223244
1612270613.311385	41	0.06872037798166275
1612270628.960634	42	0.05766312777996063
1612270641.7700076	43	0.07467532157897949
1612270652.1774454	44	0.03684210404753685
1612270662.6365113	45	0.04878048598766327
1612270672.3408914	46	0.04968944191932678
1612270685.5573287	47	0.08661417663097382
1612270694.8243237	48	0.0516853928565979
1612270707.1991303	49	0.029739776626229286
1612270718.503964	50	0.07920791953802109
1612270728.01459	51	0.10000000149011612
1612270741.4972413	52	0.05228758230805397
1612270755.0321488	53	0.030674846842885017
1612270766.837128	54	0.07052896916866302
1612270779.5862513	55	0.06666667014360428
1612270791.7092602	56	0.056716419756412506
1612270802.7649026	57	0.07088122516870499
1612270817.1669524	58	0.06508875638246536
1612270828.372833	59	0.04278074949979782
1612270839.4595425	60	0.049056604504585266
1612270852.5327775	61	0.07169811427593231
1612270866.67328	62	0.06413301825523376
1612270881.1168268	63	0.10989011079072952
1612270894.0647855	64	0.06164383515715599
1612270905.836342	65	0.052521008998155594
1612270918.0846136	66	0.06666667014360428
1612270929.0929952	67	0.06666667014360428
1612270942.8249261	68	0.05163043364882469
1612270955.5512369	69	0.05655527114868164
1612270970.5629325	70	0.1055045872926712
1612270978.852438	71	0.06716418266296387
1612270991.736535	72	0.031147541478276253
1612271003.223382	73	0.05113636329770088
1612271014.9596553	74	0.09417040646076202
1612271023.078819	75	0.05517241358757019
1612271038.765843	76	0.1111111119389534
1612271049.571112	77	0.04280155524611473
1612271059.1566606	78	0.06666667014360428
1612271071.3739707	79	0.0714285746216774
1612271082.9251955	80	0.09405940771102905
1612271096.3464928	81	0.09142857044935226
1612271107.9954743	82	0.13114753365516663
1612271120.7658875	83	0.08965517580509186
1612271132.428722	84	0.06557376682758331
1612271142.3321507	85	0.05092592537403107
1612271153.8254597	86	0.07857143133878708
1612271165.8803077	87	0.09311740845441818
1612271178.0118532	88	0.07434944063425064
1612271190.8959806	89	0.0881458967924118
1612271201.2046757	90	0.04958677664399147
1612271210.7747328	91	0.05042016878724098
1612271222.8841887	92	0.05056179687380791
1612271237.0350015	93	0.0803212821483612
1612271249.8981104	94	0.1015625
1612271264.5309372	95	0.054580897092819214
1612271278.3579726	96	0.0684523805975914
1612271289.3211033	97	0.11949685215950012
1612271300.746104	98	0.07569721341133118
1612271315.1028292	99	0.08988764137029648
1612271327.1334817	100	0.08076923340559006
