# Supplementary material
Source: ML conference proceedings conference paper supplement (https://proceedings.mlr.press/v139/rahman21a.html)
Supplement: Supplementary file 3 [file rahman21a-supp.zip › ICMLSupportingDoc 2/Visualization/OpenShootingAccuracy/QL/run-adwclsctqk-tag-Shooting_train_accuracy2.csv]

Wall time	Step	Value
1612269169.2205188	0	nan
1612269260.3145757	0	nan
1612269286.275367	0	nan
1612269295.9304926	1	0.01887810230255127
1612269304.7270536	2	0.01730310171842575
1612269315.396878	3	0.017907634377479553
1612269323.4373991	4	0.02745995484292507
1612269333.3029203	5	0.018359150737524033
1612269345.1424043	6	0.022304832935333252
1612269353.744839	7	0.023638231679797173
1612269362.4337807	8	0.02151394449174404
1612269371.1619673	9	0.0
1612269380.294358	10	0.017241379246115685
1612269390.7681441	11	0.016620498150587082
1612269398.7854383	12	0.01440329197794199
1612269406.58217	13	0.031605564057826996
1612269415.723803	14	0.007299270015209913
1612269426.6751225	15	0.028312571346759796
1612269437.1701472	16	0.04076087102293968
1612269446.3919742	17	0.038142621517181396
1612269455.8907814	18	0.0565149150788784
1612269465.3064058	19	0.08716706931591034
1612269473.1492264	20	0.04208416864275932
1612269483.8374295	21	0.07263922691345215
1612269493.150597	22	0.03807947039604187
1612269504.1642296	23	0.057575758546590805
1612269514.7556326	24	0.041420117020606995
1612269523.0751166	25	0.06557376682758331
1612269531.8264828	26	0.037974681705236435
1612269540.5048683	27	0.04152823984622955
1612269550.1446593	28	0.038303691893815994
1612269559.2885466	29	0.022140221670269966
1612269568.579041	30	0.03179190680384636
1612269577.0167224	31	0.042414356023073196
1612269585.99657	32	0.03163016960024834
1612269596.844483	33	0.04151838645339012
1612269607.0745475	34	0.04566210135817528
1612269619.2681677	35	0.07263922691345215
1612269628.0465415	36	0.056542810052633286
1612269637.3258867	37	0.050704225897789
1612269648.0364091	38	0.05253283306956291
1612269658.2580523	39	0.0742659792304039
1612269668.1938953	40	0.05470459535717964
1612269677.5591059	41	0.056367430835962296
1612269688.75184	42	0.04963235184550285
1612269701.3299882	43	0.04204993322491646
1612269711.7894013	44	0.05934065952897072
1612269720.554375	45	0.04572564736008644
1612269728.5628827	46	0.05225653201341629
1612269736.2603316	47	0.08695652335882187
1612269747.3309927	48	0.09285714477300644
1612269757.7100234	49	0.07365439087152481
1612269766.5093184	50	0.05806451663374901
1612269775.6883898	51	0.1145833358168602
1612269785.1625042	52	0.05190311372280121
1612269796.4864142	53	0.05481283366680145
1612269804.7947812	54	0.06228373572230339
1612269813.665276	55	0.03129074349999428
1612269823.0538793	56	0.05775076150894165
1612269831.716267	57	0.07096774131059647
1612269840.642335	58	0.08239700645208359
1612269850.7383873	59	0.06985294073820114
1612269858.7626214	60	0.03966597095131874
1612269871.1006305	61	0.03097345121204853
1612269879.9474869	62	0.0892857164144516
1612269888.3909228	63	0.051851850003004074
1612269897.5192478	64	0.04477611929178238
1612269906.5355968	65	0.06333333253860474
1612269916.8305106	66	0.05289672687649727
1612269928.309708	67	0.05882352963089943
1612269939.130701	68	0.09502262622117996
1612269947.9879525	69	0.07692307978868484
1612269958.5898411	70	0.06818182021379471
1612269967.2687602	71	0.05319149047136307
1612269976.1358893	72	0.050243113189935684
1612269986.0216343	73	0.037764351814985275
1612269996.563833	74	0.05222437158226967
1612270008.0008569	75	0.05421686917543411
1612270019.4005983	76	0.09225092083215714
1612270028.9693482	77	0.05118830129504204
1612270039.948615	78	0.07428571581840515
1612270051.1943638	79	0.04581673443317413
1612270061.955491	80	0.0694444477558136
1612270071.6610472	81	0.06586826592683792
1612270081.572496	82	0.06976744532585144
1612270090.282934	83	0.05870445445179939
1612270099.9615574	84	0.079632468521595
1612270111.4613602	85	0.05206463113427162
1612270120.6900814	86	0.10389610379934311
1612270131.3542187	87	0.07188160717487335
1612270140.821743	88	0.0717131495475769
1612270150.3407946	89	0.044802866876125336
1612270161.9314532	90	0.12068965286016464
1612270172.3307474	91	0.055910542607307434
1612270181.758837	92	0.08077994734048843
1612270190.6600344	93	0.06133829057216644
1612270200.0134032	94	0.07894736528396606
1612270210.1857414	95	0.05538461357355118
1612270219.0503001	96	0.10941475629806519
1612270228.0242283	97	0.06619385629892349
1612270238.224732	98	0.05936073139309883
1612270249.4273436	99	0.06564551591873169
1612270257.973658	100	0.06683804839849472
