# Supplementary material
Source: ML conference proceedings conference paper supplement (https://proceedings.mlr.press/v139/rahman21a.html)
Supplement: Supplementary file 3 [file rahman21a-supp.zip › ICMLSupportingDoc 2/Visualization/OpenShootingAccuracy/QL/run-aiviwcbbvl-tag-Shooting_train_accuracy2.csv]

Wall time	Step	Value
1612270265.5153933	0	0.029411764815449715
1612270275.8007061	1	0.014177381992340088
1612270285.038629	2	0.01760299690067768
1612270294.017896	3	0.015553522855043411
1612270299.9980705	4	0.01448040921241045
1612270307.1738212	5	0.019023986533284187
1612270314.7937965	6	0.01902291364967823
1612270322.5217178	7	0.028783658519387245
1612270332.667582	8	0.022438611835241318
1612270340.798296	9	0.0223214291036129
1612270349.3967733	10	0.03703703731298447
1612270358.7372367	11	0.023255813866853714
1612270368.3230708	12	0.021996615454554558
1612270377.0732856	13	0.01595744676887989
1612270387.1680017	14	0.01343570090830326
1612270396.842357	15	0.03030303120613098
1612270407.0474823	16	0.03351955488324165
1612270414.5997293	17	0.02946273796260357
1612270424.7524383	18	0.0577281191945076
1612270437.5723743	19	0.04648956283926964
1612270446.7554789	20	0.05299145355820656
1612270454.9001374	21	0.059278350323438644
1612270463.2411327	22	0.05013192445039749
1612270473.339406	23	0.04882459342479706
1612270483.2743304	24	0.06451612710952759
1612270492.9330704	25	0.05639614909887314
1612270501.2731066	26	0.05443548411130905
1612270508.8271046	27	0.068359375
1612270518.3233194	28	0.07407407462596893
1612270527.1501312	29	0.08156028389930725
1612270537.4789631	30	0.044742729514837265
1612270546.0803354	31	0.04655870422720909
1612270553.296472	32	0.04556354880332947
1612270562.844665	33	0.05511811003088951
1612270572.1635847	34	0.034715525805950165
1612270583.9388835	35	0.044086020439863205
1612270590.9548492	36	0.03156565502285957
1612270600.0819879	37	0.056880734860897064
1612270609.5062919	38	0.06707317382097244
1612270619.0057259	39	0.026275115087628365
1612270626.71691	40	0.05000000074505806
1612270638.1249583	41	0.07307692617177963
1612270650.3714204	42	0.054014597088098526
1612270659.5809107	43	0.060546875
1612270667.6505241	44	0.05430711433291435
1612270677.2321737	45	0.039829302579164505
1612270686.2458415	46	0.06227106228470802
1612270695.8138912	47	0.045523520559072495
1612270705.3911	48	0.08148147910833359
1612270715.7060225	49	0.10465116053819656
1612270725.1365483	50	0.034090910106897354
1612270736.8570557	51	0.06118546798825264
1612270741.1988122	52	0.0476190485060215
1612270747.7387578	53	0.08884297311306
1612270757.2800899	54	0.04695431515574455
1612270769.3273277	55	0.06190476194024086
1612270776.6945872	56	0.03747072443366051
1612270785.8154585	57	0.04779411852359772
1612270796.2511842	58	0.05891238525509834
1612270805.9140701	59	0.05523255839943886
1612270813.6769934	60	0.0704960823059082
1612270824.8081849	61	0.07709750533103943
1612270836.057248	62	0.052297938615083694
1612270843.3535874	63	0.05093833804130554
1612270852.1426826	64	0.0541401281952858
1612270863.2500644	65	0.05283018946647644
1612270872.388176	66	0.06733167171478271
1612270881.5659816	67	0.046384721994400024
1612270890.5112138	68	0.045130640268325806
1612270899.8179996	69	0.05026929825544357
1612270910.1523695	70	0.059813085943460464
1612270919.6297572	71	0.05456852912902832
1612270927.130625	72	0.0476190485060215
1612270936.437947	73	0.060301508754491806
1612270944.6952596	74	0.061403509229421616
1612270954.2654166	75	0.06332454085350037
1612270962.4942489	76	0.06197183206677437
1612270971.2474303	77	0.08219178020954132
1612270980.6356597	78	0.05427631735801697
1612270991.0097775	79	0.06211180239915848
1612270998.726367	80	0.06534090638160706
1612271008.9174485	81	0.06752411276102066
1612271017.9083555	82	0.09797297418117523
1612271028.097124	83	0.0791139230132103
1612271037.4648466	84	0.07249467074871063
1612271048.6427507	85	0.07777778059244156
1612271057.7546892	86	0.059659089893102646
1612271068.65988	87	0.09960159659385681
1612271077.308563	88	0.06199999898672104
1612271085.8885632	89	0.04373757541179657
1612271094.444968	90	0.06043956056237221
1612271103.9621282	91	0.0698254331946373
1612271115.068078	92	0.04640718549489975
1612271125.0852928	93	0.06798867136240005
1612271133.7068381	94	0.05432937294244766
1612271141.5544958	95	0.06187291070818901
1612271150.6129065	96	0.0920245423913002
1612271160.702907	97	0.04741980507969856
1612271170.4335742	98	0.052441228181123734
1612271180.9558237	99	0.04651162773370743
1612271188.812199	100	0.06267806142568588
