# Supplementary material
Source: ML conference proceedings conference paper supplement (https://proceedings.mlr.press/v139/rahman21a.html)
Supplement: Supplementary file 3 [file rahman21a-supp.zip › ICMLSupportingDoc 2/Visualization/OpenShootingAccuracy/QL/run-ewywycsjuj-tag-Shooting_train_accuracy2.csv]

Wall time	Step	Value
1612271197.5542407	0	nan
1612271206.300023	1	0.01745423674583435
1612271213.8641841	2	0.018427519127726555
1612271222.5342295	3	0.015057573094964027
1612271233.0072837	4	0.01985440030694008
1612271241.8764472	5	0.01744186133146286
1612271253.1169794	6	0.02146298810839653
1612271262.846719	7	0.01600000075995922
1612271272.37329	8	0.03161397576332092
1612271281.8255599	9	0.024875622242689133
1612271290.8416755	10	0.0
1612271300.7991695	11	0.04040404036641121
1612271311.726125	12	0.019736841320991516
1612271320.2797148	13	0.013333333656191826
1612271327.9484704	14	0.01293103490024805
1612271338.435759	15	0.02842809446156025
1612271350.0521126	16	0.041561711579561234
1612271358.735502	17	0.0458715595304966
1612271368.3841054	18	0.0516853928565979
1612271375.944198	19	0.037383176386356354
1612271382.7964568	20	0.04584527388215065
1612271389.1724627	21	0.04691357910633087
1612271399.0982537	22	0.06340579688549042
1612271408.1657972	23	0.043697480112314224
1612271417.6335173	24	0.07389162480831146
1612271425.0984888	25	0.052098408341407776
1612271435.1487138	26	0.037617553025484085
1612271444.803132	27	0.05782792717218399
1612271453.7961538	28	0.05582922697067261
1612271461.9216225	29	0.052000001072883606
1612271470.0594096	30	0.043927647173404694
1612271479.6975658	31	0.052489906549453735
1612271487.3893278	32	0.05180180072784424
1612271494.4682455	33	0.04419191926717758
1612271505.8184235	34	0.062394604086875916
1612271514.4706795	35	0.029173418879508972
1612271525.2940779	36	0.06843267381191254
1612271534.6548247	37	0.06801007688045502
1612271542.9357514	38	0.06334841996431351
1612271552.212238	39	0.0445544570684433
1612271560.4790192	40	0.059308070689439774
1612271570.176224	41	0.0595533512532711
1612271580.9600008	42	0.05820105969905853
1612271591.858058	43	0.0455729179084301
1612271600.9047763	44	0.07524752616882324
1612271612.2955647	45	0.05070994049310684
1612271621.5296094	46	0.03484848514199257
1612271632.3292987	47	0.05672268941998482
1612271641.6589315	48	0.05128205195069313
1612271649.227601	49	0.060975611209869385
1612271655.0643895	50	0.06722689419984818
1612271663.883724	51	0.07671957463026047
1612271674.6140172	52	0.06118880957365036
1612271682.0513008	53	0.07017543911933899
1612271690.1529498	54	0.058510638773441315
1612271701.2884703	55	0.0969529077410698
1612271711.5284343	56	0.050724636763334274
1612271721.4364574	57	0.0492359921336174
1612271731.4485369	58	0.04176611080765724
1612271740.786255	59	0.050259966403245926
1612271748.8417044	60	0.07384615391492844
1612271757.7219055	61	0.0433482825756073
1612271766.2691152	62	0.04444444552063942
1612271774.7606978	63	0.0569395013153553
1612271783.4343781	64	0.04580152779817581
1612271792.4827418	65	0.09090909361839294
1612271802.0518188	66	0.07012195140123367
1612271811.8923461	67	0.06743738055229187
1612271821.7180357	68	0.05702647566795349
1612271830.9517822	69	0.08306708931922913
1612271842.3322942	70	0.04315659776329994
1612271852.5193694	71	0.06172839552164078
1612271862.944351	72	0.05043227598071098
1612271873.1294577	73	0.07127882540225983
1612271880.9258687	74	0.07667731493711472
1612271890.1027257	75	0.0676470622420311
1612271897.3467293	76	0.10606060922145844
1612271906.475182	77	0.07472527772188187
1612271915.31489	78	0.06037735939025879
1612271924.5178473	79	0.06043956056237221
1612271934.819167	80	0.06326033920049667
1612271943.6746116	81	0.05255255103111267
1612271952.3702476	82	0.07666666805744171
1612271962.9459836	83	0.07333333045244217
1612271974.3231316	84	0.04691075533628464
1612271984.1107457	85	0.04893964156508446
1612271992.4137323	86	0.06228373572230339
1612272002.2974942	87	0.07296137511730194
1612272011.0855784	88	0.14438502490520477
1612272020.5607517	89	0.05766871199011803
1612272028.9348338	90	0.043795619159936905
1612272038.6791136	91	0.05284553021192551
1612272047.7987797	92	0.05981595069169998
1612272058.9003427	93	0.07573150098323822
1612272066.828887	94	0.04776579514145851
1612272075.9276	95	0.058236271142959595
1612272084.6489818	96	0.04328358173370361
1612272091.7934577	97	0.09062500298023224
1612272101.733994	98	0.0364464707672596
1612272111.0601552	99	0.050847455859184265
1612272121.9134843	100	0.061771560460329056
