# Supplementary material
Source: ML conference proceedings conference paper supplement (https://proceedings.mlr.press/v139/rahman21a.html)
Supplement: Supplementary file 3 [file rahman21a-supp.zip › ICMLSupportingDoc 2/Visualization/OpenShootingAccuracy/QL/run-gqtstkdnvc-tag-Shooting_train_accuracy2.csv]

Wall time	Step	Value
1612272130.6240244	0	0.01536688394844532
1612272139.328616	1	0.015909090638160706
1612272147.0161347	2	0.015805471688508987
1612272155.079038	3	0.015024038031697273
1612272164.2052062	4	0.01767541468143463
1612272172.902363	5	0.018018018454313278
1612272181.7893481	6	0.02250530757009983
1612272189.8915632	7	0.02278275042772293
1612272197.5815964	8	0.03141361102461815
1612272206.0219715	9	0.013071895577013493
1612272214.2747262	10	0.07017543911933899
1612272221.854796	11	0.046875
1612272229.643993	12	0.01706484705209732
1612272238.7977247	13	0.025547444820404053
1612272249.2492054	14	0.01825842633843422
1612272256.564855	15	0.02711864374577999
1612272264.7010982	16	0.02207130752503872
1612272272.9918094	17	0.07008547335863113
1612272284.1040382	18	0.05270863696932793
1612272292.959029	19	0.040345821529626846
1612272302.9831634	20	0.06697459518909454
1612272311.7072883	21	0.06148867309093475
1612272319.2802184	22	0.04545454680919647
1612272327.4682713	23	0.05090909078717232
1612272336.5704248	24	0.034285712987184525
1612272345.6926231	25	0.04599406570196152
1612272355.244087	26	0.04188481718301773
1612272364.238004	27	0.04214559495449066
1612272372.7134948	28	0.08157099783420563
1612272380.8639877	29	0.04457831382751465
1612272390.1937182	30	0.03890489786863327
1612272399.4133873	31	0.04436229169368744
1612272405.2220693	32	0.025179855525493622
1612272414.649651	33	0.032573290169239044
1612272421.8971448	34	0.03256705030798912
1612272429.0263906	35	0.03609625622630119
1612272437.7107978	36	0.04223864898085594
1612272447.4867435	37	0.03675856441259384
1612272455.4417205	38	0.037552155554294586
1612272465.4824476	39	0.03648068755865097
1612272474.9963293	40	0.036753445863723755
1612272483.3346257	41	0.08791209012269974
1612272490.7580097	42	0.05978260934352875
1612272497.4190826	43	0.04432132840156555
1612272503.7224898	44	0.04188481718301773
1612272513.919998	45	0.06192660704255104
1612272519.78266	46	0.07421875
1612272528.5780632	47	0.07051282376050949
1612272538.8965356	48	0.0591016560792923
1612272547.143316	49	0.09132420271635056
1612272554.209819	50	0.06948640197515488
1612272563.1083534	51	0.057866185903549194
1612272573.5188987	52	0.07225433737039566
1612272583.0194263	53	0.1376146823167801
1612272593.5065243	54	0.056603774428367615
1612272601.414649	55	0.05871212109923363
1612272609.2561674	56	0.09223300963640213
1612272618.5577075	57	0.04743082821369171
1612272627.8813508	58	0.05865102633833885
1612272636.955063	59	0.06164383515715599
1612272645.7522926	60	0.051948051899671555
1612272653.4654336	61	0.04608295112848282
1612272663.525675	62	0.060301508754491806
1612272671.979129	63	0.0602409653365612
1612272679.8908465	64	0.05246913433074951
1612272689.1300795	65	0.06433823704719543
1612272697.941102	66	0.04101838916540146
1612272706.2625308	67	0.05376344174146652
1612272713.8660247	68	0.030927835032343864
1612272724.074301	69	0.07288629561662674
1612272729.9797945	70	0.07027027010917664
1612272738.91952	71	0.05921052768826485
1612272750.599414	72	0.06652360409498215
1612272761.8514156	73	0.03752535581588745
1612272771.2710667	74	0.03476669639348984
1612272781.0279047	75	0.05190311372280121
1612272792.1452236	76	0.04674796760082245
1612272801.7501523	77	0.02663438208401203
1612272809.3784726	78	0.05538461357355118
1612272818.430809	79	0.06775067746639252
1612272828.9572508	80	0.06361828744411469
1612272837.3194005	81	0.05121293663978577
1612272846.9535646	82	0.07894736528396606
1612272855.8099182	83	0.0559440553188324
1612272863.7216067	84	0.08201892673969269
1612272872.2303202	85	0.05846153944730759
1612272880.2521508	86	0.048175182193517685
1612272890.3018308	87	0.05921052768826485
1612272900.041129	88	0.056716419756412506
1612272909.560808	89	0.049707602709531784
1612272918.9638212	90	0.04378283768892288
1612272927.461292	91	0.06209150329232216
1612272936.9596152	92	0.09364548325538635
1612272946.7920725	93	0.04582210257649422
1612272954.327116	94	0.049056604504585266
1612272961.9429367	95	0.06734006851911545
1612272970.1925337	96	0.06329113990068436
1612272978.2708406	97	0.07692307978868484
1612272987.1090603	98	0.04624277353286743
1612272997.2153242	99	0.07263922691345215
1612273007.4430058	100	0.0679442510008812
