# Supplementary material
Source: ML conference proceedings conference paper supplement (https://proceedings.mlr.press/v139/rahman21a.html)
Supplement: Supplementary file 3 [file rahman21a-supp.zip › ICMLSupportingDoc 2/Visualization/OpenShootingAccuracy/QL/run-hbulgxtzpv-tag-Shooting_train_accuracy2.csv]

Wall time	Step	Value
1612273017.0751567	0	0.01422265823930502
1612273025.114301	1	0.013975155539810658
1612273033.0956786	2	0.018285714089870453
1612273041.3226628	3	0.010028652846813202
1612273051.8833501	4	0.01423977967351675
1612273058.873145	5	0.0232783704996109
1612273066.7587435	6	0.03184230625629425
1612273072.9580767	7	0.02142857201397419
1612273082.1187935	8	0.04098360612988472
1612273092.8930347	9	0.026442307978868484
1612273101.409085	10	0.02463054098188877
1612273108.2450547	11	0.02005012519657612
1612273116.8392487	12	0.03616352379322052
1612273125.9787784	13	0.018041236326098442
1612273135.404699	14	0.027750248089432716
1612273145.9835331	15	0.036827195435762405
1612273155.072514	16	0.02666666731238365
1612273164.839267	17	0.04562043771147728
1612273171.6937268	18	0.04008908569812775
1612273178.8522282	19	0.045908182859420776
1612273186.770366	20	0.026178009808063507
1612273195.0678823	21	0.06798245757818222
1612273202.5678854	22	0.05025125667452812
1612273213.5738504	23	0.04935064911842346
1612273219.777305	24	0.07174888253211975
1612273227.5367203	25	0.045908182859420776
1612273237.248244	26	0.04457652196288109
1612273247.1409183	27	0.04773269593715668
1612273255.850417	28	0.06440678238868713
1612273264.417814	29	0.04942965880036354
1612273273.8400974	30	0.040618956089019775
1612273282.4053292	31	0.05714285746216774
1612273291.8507195	32	0.04814004525542259
1612273301.837366	33	0.044843047857284546
1612273308.9588237	34	0.05089820176362991
1612273318.6685116	35	0.03696857765316963
1612273327.589326	36	0.05146036297082901
1612273333.2754774	37	0.04435483738780022
1612273343.1464171	38	0.03755868598818779
1612273351.3454835	39	0.036363635212183
1612273361.6674814	40	0.05823863670229912
1612273368.9876912	41	0.06149732694029808
1612273377.1646972	42	0.05147058889269829
1612273385.5566053	43	0.045614033937454224
1612273393.2841854	44	0.06783919781446457
1612273399.962604	45	0.11666666716337204
1612273408.992184	46	0.08284023404121399
1612273418.0043051	47	0.04024145007133484
1612273425.8453882	48	0.03854389861226082
1612273435.8333654	49	0.052901022136211395
1612273443.4603486	50	0.048237476497888565
1612273453.4908545	51	0.07195571810007095
1612273462.7947276	52	0.05653710290789604
1612273471.1434634	53	0.036866359412670135
1612273478.4879968	54	0.03892944008111954
1612273488.0332413	55	0.033236995339393616
1612273497.2606883	56	0.045378152281045914
1612273505.213195	57	0.033096928149461746
1612273515.1391473	58	0.06183745712041855
1612273524.710398	59	0.07240704447031021
1612273536.2801423	60	0.050215207040309906
1612273543.8017137	61	0.05205479636788368
1612273555.5114253	62	0.07175572216510773
1612273564.0480251	63	0.07560137659311295
1612273574.1966772	64	0.03921568766236305
1612273585.5005157	65	0.0771513357758522
1612273594.4788885	66	0.04207920655608177
1612273602.403573	67	0.060693640261888504
1612273612.1561346	68	0.03664921596646309
1612273622.838007	69	0.040816325694322586
1612273632.120724	70	0.07713498920202255
1612273642.2271132	71	0.05797101557254791
1612273649.655635	72	0.03084832988679409
1612273659.185853	73	0.04143126308917999
1612273668.7450888	74	0.05882352963089943
1612273679.859588	75	0.07829977571964264
1612273687.1402922	76	0.036666665226221085
1612273697.2805722	77	0.04218362271785736
1612273704.1029563	78	0.07027027010917664
1612273714.1245353	79	0.027272727340459824
1612273721.8770967	80	0.07203389704227448
1612273731.9240267	81	0.07355865091085434
1612273742.8432348	82	0.06118880957365036
1612273751.6840663	83	0.06315789371728897
1612273759.7802732	84	0.058411214500665665
1612273769.1708913	85	0.040618956089019775
1612273776.470956	86	0.05276381969451904
1612273784.9820528	87	0.0394265241920948
1612273795.0818858	88	0.052441228181123734
1612273804.7920744	89	0.03932584449648857
1612273815.3126671	90	0.08064515888690948
1612273824.6109402	91	0.05535055324435234
1612273833.308507	92	0.05509641766548157
1612273842.1317275	93	0.057777777314186096
1612273852.4963336	94	0.04538087546825409
1612273863.542378	95	0.0791366919875145
1612273870.88227	96	0.05213269963860512
1612273879.6138804	97	0.07011070102453232
1612273889.0020127	98	0.061764705926179886
1612273899.4306006	99	0.06459330022335052
1612273908.846026	100	0.055710308253765106
