# Supplementary material
Source: ML conference proceedings conference paper supplement (https://proceedings.mlr.press/v139/rahman21a.html)
Supplement: Supplementary file 3 [file rahman21a-supp.zip › ICMLSupportingDoc 2/Visualization/OpenShootingAccuracy/QL/run-jkgwdlszub-tag-Shooting_train_accuracy2.csv]

Wall time	Step	Value
1612273914.8170981	0	nan
1612273922.989487	1	0.016299918293952942
1612273929.9099174	2	0.02247191034257412
1612273936.9699748	3	0.020522387698292732
1612273947.04542	4	0.019500000402331352
1612273954.9416475	5	0.015555555932223797
1612273963.3603084	6	0.013994910754263401
1612273970.3732069	7	0.021262886002659798
1612273977.9331565	8	0.03917301446199417
1612273984.9082518	9	0.032258063554763794
1612273992.6422505	10	0.03248259797692299
1612274000.4346304	11	0.01440329197794199
1612274008.2098134	12	0.01701093651354313
1612274016.8373594	13	0.029752066358923912
1612274023.160461	14	0.008645533584058285
1612274031.651653	15	0.03361344709992409
1612274041.313776	16	0.02828618884086609
1612274051.0969903	17	0.03438185900449753
1612274059.550816	18	0.04078947380185127
1612274067.6275158	19	0.030944624915719032
1612274073.4207633	20	0.03624382242560387
1612274083.546183	21	0.05368289723992348
1612274091.26698	22	0.07664233446121216
1612274100.3493273	23	0.03921568766236305
1612274108.86899	24	0.029914529994130135
1612274119.8652205	25	0.04843304678797722
1612274128.723972	26	0.057195570319890976
1612274136.338823	27	0.03345724940299988
1612274145.5914006	28	0.03546099364757538
1612274155.7700942	29	0.03667481616139412
1612274162.352641	30	0.04100227728486061
1612274171.204358	31	0.04441913589835167
1612274181.6555252	32	0.03846153989434242
1612274188.8499727	33	0.07017543911933899
1612274197.736409	34	0.044692736119031906
1612274207.3742466	35	0.06580829620361328
1612274216.4277487	36	0.08421052992343903
1612274227.6022773	37	0.057444315403699875
1612274233.5071664	38	0.05111820995807648
1612274241.3876376	39	0.03333333507180214
1612274253.1211848	40	0.047034766525030136
1612274264.058618	41	0.06444906443357468
1612274272.179	42	0.06994818896055222
1612274282.6140592	43	0.08152174204587936
1612274289.3082886	44	0.06012658402323723
1612274297.0394502	45	0.0602409653365612
1612274307.268319	46	0.04038461670279503
1612274314.6335127	47	0.03403756022453308
1612274322.5596697	48	0.12269938737154007
1612274330.917964	49	0.0371389277279377
1612274339.989302	50	0.09634551405906677
1612274348.4736888	51	0.03629032149910927
1612274357.245908	52	0.0659722238779068
1612274364.1980233	53	0.04749999940395355
1612274373.502331	54	0.09022556245326996
1612274381.5215518	55	0.06167401000857353
1612274390.9003835	56	0.03402366861701012
1612274399.8350275	57	0.051172707229852676
1612274409.191406	58	0.0552995391190052
1612274419.673353	59	0.055679287761449814
1612274427.7649662	60	0.02310924418270588
1612274437.9971797	61	0.03217821940779686
1612274447.1719768	62	0.04109589010477066
1612274456.3309708	63	0.03152585029602051
1612274464.6098566	64	0.04329897090792656
1612274474.167296	65	0.06272401660680771
1612274484.2066357	66	0.06068601459264755
1612274494.1478581	67	0.02881355956196785
1612274503.025274	68	0.0357142873108387
1612274512.3214705	69	0.05010019987821579
1612274522.67977	70	0.06840390712022781
1612274532.9781697	71	0.03874092176556587
1612274543.6856632	72	0.06622516363859177
1612274552.9746158	73	0.038596492260694504
1612274560.7205079	74	0.03241895139217377
1612274568.7995675	75	0.09600000083446503
1612274574.6534975	76	0.1785714328289032
1612274584.3615308	77	0.057692307978868484
1612274594.340469	78	0.032967034727334976
1612274605.8498118	79	0.09010989218950272
1612274616.4119134	80	0.08119658380746841
1612274625.882435	81	0.035772357136011124
1612274636.1864429	82	0.054901961237192154
1612274645.0861077	83	0.08387096971273422
1612274654.8492985	84	0.06873614341020584
1612274665.6082456	85	0.08554572612047195
1612274674.3928819	86	0.08547008782625198
1612274683.9098573	87	0.05751391500234604
1612274691.202334	88	0.04357798025012016
1612274699.816028	89	0.07672633975744247
1612274708.7080092	90	0.07874015718698502
1612274718.6964755	91	0.06888888776302338
1612274728.8674786	92	0.032815199345350266
1612274738.1266663	93	0.09384164214134216
1612274748.1443148	94	0.06428571790456772
1612274756.8912604	95	0.05959031730890274
1612274767.5609586	96	0.06296851485967636
1612274777.2517338	97	0.058943089097738266
1612274784.268128	98	0.0797872319817543
1612274794.3611052	99	0.05249343812465668
1612274804.5472744	100	0.06438631564378738
