# Supplementary material
Source: ML conference proceedings conference paper supplement (https://proceedings.mlr.press/v139/rahman21a.html)
Supplement: Supplementary file 3 [file rahman21a-supp.zip › ICMLSupportingDoc 2/Visualization/OpenShootingAccuracy/QL/run-qqqvkconlw-tag-Shooting_train_accuracy2.csv]

Wall time	Step	Value
1612274812.8497038	0	nan
1612274821.1728046	1	0.01746293157339096
1612274830.2199066	2	0.01654135249555111
1612274838.0571318	3	0.017841970548033714
1612274847.4492788	4	0.017296604812145233
1612274853.8292196	5	0.015706805512309074
1612274861.4628093	6	0.02378121204674244
1612274869.7109156	7	0.017425520345568657
1612274879.744937	8	0.00800000037997961
1612274886.6325228	9	0.007936508394777775
1612274893.607253	10	0.01406249962747097
1612274901.4925714	11	0.010810811072587967
1612274909.234203	12	0.020866774022579193
1612274919.3499608	13	0.031930334866046906
1612274927.3400984	14	0.02561669796705246
1612274936.8225608	15	0.0448143407702446
1612274944.1567552	16	0.05263157933950424
1612274953.023235	17	0.05118830129504204
1612274963.8230877	18	0.032858707010746
1612274970.8288112	19	0.046666666865348816
1612274979.4852488	20	0.04693877696990967
1612274987.7690425	21	0.030818277969956398
1612274995.8918014	22	0.09417040646076202
1612275005.803952	23	0.026911314576864243
1612275014.5483704	24	0.056179776787757874
1612275023.3918335	25	0.041147131472826004
1612275033.5775325	26	0.028352489694952965
1612275043.8314967	27	0.04934687912464142
1612275052.309624	28	0.03618817776441574
1612275061.1721747	29	0.03723404183983803
1612275067.704774	30	0.01515151560306549
1612275075.55872	31	0.051428571343421936
1612275086.6420069	32	0.06873977184295654
1612275097.630882	33	0.029976941645145416
1612275105.8833127	34	0.04297693818807602
1612275114.4877267	35	0.07169811427593231
1612275122.5413	36	0.05369127541780472
1612275127.7970514	37	0.0892857164144516
1612275137.0821187	38	0.05747126415371895
1612275144.503888	39	0.042062416672706604
1612275152.6046715	40	0.03751465305685997
1612275160.4614005	41	0.051689859479665756
1612275168.153569	42	0.05226480960845947
1612275177.8906794	43	0.06585365533828735
1612275187.4479334	44	0.047075606882572174
1612275195.3622808	45	0.05988023802638054
1612275204.522339	46	0.07816711813211441
1612275211.494292	47	0.06878306716680527
1612275221.4021552	48	0.07296137511730194
1612275228.340428	49	0.050724636763334274
1612275236.681157	50	0.04160688817501068
1612275248.198026	51	0.04219409450888634
1612275258.2944143	52	0.05925925821065903
1612275265.7405002	53	0.06041666492819786
1612275277.5753949	54	0.04198473319411278
1612275284.1917465	55	0.07127882540225983
1612275292.897835	56	0.04221251979470253
1612275301.610489	57	0.06235012039542198
1612275310.803271	58	0.08504398912191391
1612275319.414036	59	0.04734576866030693
1612275328.4375844	60	0.04604051634669304
1612275336.073208	61	0.04406130313873291
1612275346.1338592	62	0.0881458967924118
1612275354.8572724	63	0.03947368264198303
1612275365.9796815	64	0.06457242369651794
1612275375.394428	65	0.04663212597370148
1612275383.9261432	66	0.07534246891736984
1612275392.5729694	67	0.0480961911380291
1612275399.6001039	68	0.033734939992427826
1612275408.8743627	69	0.13793103396892548
1612275418.1153176	70	0.07619047909975052
1612275427.2162788	71	0.059065934270620346
1612275436.5740373	72	0.057208236306905746
1612275445.5997138	73	0.08383233845233917
1612275454.7902699	74	0.07648183405399323
1612275463.2716122	75	0.08403361588716507
1612275468.6220915	76	0.0731707289814949
1612275478.1325197	77	0.046043165028095245
1612275486.815265	78	0.08713693171739578
1612275494.1549125	79	0.06094808131456375
1612275504.5129342	80	0.0555555559694767
1612275512.6298492	81	0.07006369531154633
1612275520.5916643	82	0.08058608323335648
1612275530.1483276	83	0.050847455859184265
1612275539.6413023	84	0.051759835332632065
1612275548.7359483	85	0.06779661029577255
1612275558.449562	86	0.03868471831083298
1612275568.0745714	87	0.06224899739027023
1612275576.328363	88	0.06355932354927063
1612275583.4925334	89	0.05507246404886246
1612275591.5461185	90	0.061162080615758896
1612275599.6535935	91	0.0544000007212162
1612275609.8956335	92	0.06043956056237221
1612275618.4392064	93	0.05415162444114685
1612275628.5325053	94	0.046875
1612275636.093522	95	0.05263157933950424
1612275643.647645	96	0.08988764137029648
1612275653.3452296	97	0.07084468752145767
1612275660.0620542	98	0.05882352963089943
1612275668.8993263	99	0.0533333346247673
1612275677.7025468	100	0.09221901744604111
