# Supplementary material
Source: ML conference proceedings conference paper supplement (https://proceedings.mlr.press/v139/rahman21a.html)
Supplement: Supplementary file 3 [file rahman21a-supp.zip › ICMLSupportingDoc 2/Visualization/OpenShootingAccuracy/QL/run-zkxtsvlqgb-tag-Shooting_train_accuracy2.csv]

Wall time	Step	Value
1612275686.5618372	0	0.0625
1612275694.788783	1	0.01318154577165842
1612275702.916403	2	0.02304147556424141
1612275711.7429066	3	0.012406948022544384
1612275719.0957704	4	0.011578305624425411
1612275727.13485	5	0.021650878712534904
1612275734.7020197	6	0.01744186133146286
1612275741.8108013	7	0.023893805220723152
1612275748.6192446	8	0.021413275972008705
1612275755.7821555	9	0.019999999552965164
1612275763.5697954	10	0.05263157933950424
1612275772.13167	11	0.02358490601181984
1612275777.3661537	12	0.02083333395421505
1612275783.7047627	13	0.02181818149983883
1612275793.3797646	14	0.02921348251402378
1612275799.965575	15	0.013990267179906368
1612275808.6246452	16	0.031515151262283325
1612275816.6704402	17	0.046709127724170685
1612275825.4265149	18	0.03609022498130798
1612275833.1958983	19	0.05494505539536476
1612275840.3398063	20	0.06926406919956207
1612275848.3370016	21	0.03993610292673111
1612275857.7771912	22	0.05016181245446205
1612275864.304499	23	0.06306306272745132
1612275873.2228723	24	0.044733043760061264
1612275880.624576	25	0.0432276651263237
1612275888.8744323	26	0.05383022874593735
1612275898.6323185	27	0.06231454014778137
1612275907.3813903	28	0.05567451938986778
1612275917.1059718	29	0.06205250695347786
1612275926.00986	30	0.042995840311050415
1612275934.7143152	31	0.041420117020606995
1612275944.0719233	32	0.03001071885228157
1612275952.1662068	33	0.06312292069196701
1612275962.6729245	34	0.04123711213469505
1612275969.856738	35	0.05604719743132591
1612275977.517418	36	0.04831625148653984
1612275986.1482792	37	0.04174397140741348
1612275994.2711549	38	0.03461538627743721
1612276002.576487	39	0.03410230576992035
1612276010.2083478	40	0.0615384615957737
1612276017.5023134	41	0.03203342482447624
1612276026.6228838	42	0.07078039646148682
1612276035.628946	43	0.050188206136226654
1612276043.349723	44	0.09615384787321091
1612276051.5509038	45	0.048426151275634766
1612276060.9275973	46	0.03994293883442879
1612276067.7584696	47	0.038383837789297104
1612276075.1795511	48	0.056910570710897446
1612276085.7183692	49	0.05128205195069313
1612276093.7771454	50	0.06501547992229462
1612276102.3019464	51	0.07331378012895584
1612276109.4015677	52	0.04008015990257263
1612276120.4957228	53	0.048346057534217834
1612276127.7723677	54	0.08571428805589676
1612276135.5828836	55	0.05390835553407669
1612276144.309654	56	0.06882590800523758
1612276152.6255236	57	0.056367430835962296
1612276161.6014113	58	0.05221518874168396
1612276170.0555167	59	0.07048457860946655
1612276176.6846812	60	0.04332130029797554
1612276185.8923388	61	0.09195402264595032
1612276192.5269647	62	0.04680851101875305
1612276201.866389	63	0.06086956337094307
1612276209.5395162	64	0.049504950642585754
1612276217.7959585	65	0.06553911417722702
1612276226.6135075	66	0.04662379249930382
1612276236.7442913	67	0.06108597293496132
1612276244.822043	68	0.04700854793190956
1612276253.424299	69	0.04076087102293968
1612276261.1673787	70	0.057777777314186096
1612276269.0635312	71	0.03640776872634888
1612276277.938391	72	0.10162601619958878
1612276285.15593	73	0.057692307978868484
1612276294.2605352	74	0.044733043760061264
1612276302.241185	75	0.04516129195690155
1612276310.6197143	76	0.08949416130781174
1612276319.337162	77	0.0398230105638504
1612276328.1961813	78	0.03144654259085655
1612276338.3340776	79	0.056896552443504333
1612276346.0723975	80	0.050490882247686386
1612276354.4498327	81	0.08201892673969269
1612276366.0655768	82	0.060358889400959015
1612276375.398417	83	0.04626334458589554
1612276386.4790862	84	0.04642409086227417
1612276395.7321472	85	0.07485029846429825
1612276407.3339481	86	0.08759123831987381
1612276417.7513537	87	0.07941176742315292
1612276426.2502005	88	0.06295399367809296
1612276435.3764534	89	0.05461393669247627
1612276445.987668	90	0.06393442302942276
1612276456.4851077	91	0.07717569917440414
1612276467.1618927	92	0.09403254836797714
1612276475.9644969	93	0.07480916380882263
1612276484.0786276	94	0.06736841797828674
1612276492.25294	95	0.056980058550834656
1612276502.2683244	96	0.051395006477832794
1612276510.9805849	97	0.07945205271244049
1612276519.0195997	98	0.09375
1612276528.282852	99	0.05781865864992142
1612276535.4114082	100	0.05494505539536476
